# Supplementary material for: Mass defect-based carbonyl activated tags (mdCATs) for multiplex data-independent acquisition proteome quantification
Source: Royal Society of Chemistry journal article supplement (doi:10.1039/d0cc06493a), 2020-12-10
Supplement: d0cc06493a1.pdf [file d0cc06493a1.pdf]

## Supplementary Information

### Mass Defect-based Carbonyl Activated Tags (mdCATs) for Multiplex Data-independent Acquisition Proteome Quantification

Siwen Zhang,<sup>a‡</sup> Yi Di,<sup>a‡</sup> Jun Yao,<sup>a</sup> Yingjie Wang,<sup>c</sup> Hong Shu,<sup>d</sup> Guoquan Yan,<sup>a</sup> Lei Zhang,<sup>a</sup> and Haojie Lu<sup>\*a b</sup>

<sup>a</sup>Institutes of Biomedical Sciences and NHC Key Laboratory of Glycoconjugates Research, Fudan University. Shanghai 200032, China. E-mail: luhaojie@fudan.edu.cn

<sup>b</sup>Shanghai Cancer Center and Department of Chemistry, Fudan University. Shanghai 200032, China.

<sup>c</sup>State Key Laboratory of Bioorganic and Natural Products Chemistry, Center for Excellence in Molecular Synthesis, Shanghai Institute of Organic Chemistry, University of Chinese Academy of Sciences, Chinese Academy of Sciences, Shanghai, 200032, P. R. China.

<sup>d</sup>Department of Clinical Laboratory, Cancer Hospital of Guangxi Medical University, Nanning, 530021, Guangxi, China.

<sup>‡</sup>The authors contribute equally to this work.

Corresponding Authors:

\* Haojie Lu, Phone: (+) 86-21-54237618. Fax: (+) 86-21-54237961. E- mail: luhaojie@fudan.edu.cn

# CONTENTS

|                                                                                                                                        |            |
|----------------------------------------------------------------------------------------------------------------------------------------|------------|
| <b>MATERIALS AND METHODS</b> .....                                                                                                     | <b>1</b>   |
| <i>Materials and Chemicals</i> .....                                                                                                   | <i>1</i>   |
| <i>Synthesis of Mass Defect-based Carboxyl-Active Tag (mdCAT)</i> .....                                                                | <i>1</i>   |
| <i>Purification and Detection of MdCAT reagents</i> .....                                                                              | <i>1</i>   |
| <i>Sample Selection and Preparation</i> .....                                                                                          | <i>2</i>   |
| <i>Matrix-Assisted Laser Desorption Ionization Time-Of-Flight Mass Spectrometry (MALDI-TOF MS)</i>                                     |            |
| <i>Analysis</i> .....                                                                                                                  | <i>2</i>   |
| <i>Liquid Chromatography Tandem Mass Spectrometry Analysis</i> .....                                                                   | <i>2</i>   |
| <i>Data Analysis</i> .....                                                                                                             | <i>3</i>   |
| <i>Quantification</i> .....                                                                                                            | <i>4</i>   |
| <i>Supporting Figures</i> .....                                                                                                        | <i>5</i>   |
| <i>Fig. S1 <sup>1</sup>H NMR of (Ac)<sub>2</sub>-lysine <sup>13</sup>C<sub>6</sub> <sup>15</sup>N<sub>2</sub></i> .....                | <i>5</i>   |
| <i>Fig. S2 <sup>13</sup>C NMR of (Ac)<sub>2</sub>-lysine <sup>13</sup>C<sub>6</sub> <sup>13</sup>C<sub>2</sub></i> .....               | <i>6</i>   |
| <i>Fig. S3 <sup>1</sup>H NMR of (Ac)<sub>2</sub>-lysine <sup>13</sup>C<sub>6</sub> <sup>13</sup>C<sub>2</sub></i> .....                | <i>6</i>   |
| <i>Fig. S4 <sup>1</sup>H NMR of (Ac)<sub>2</sub>-lysine D<sub>8</sub></i> .....                                                        | <i>7</i>   |
| <i>Fig. S5 <sup>1</sup>H NMR of (Ac)<sub>2</sub>-lysine D<sub>4</sub> <sup>13</sup>C<sub>4</sub></i> .....                             | <i>7</i>   |
| <i>Fig. S6 <sup>1</sup>H NMR of Boc-(Me)<sub>2</sub>-lysine 2*CD<sub>3</sub></i> .....                                                 | <i>8</i>   |
| <i>Fig. S7 <sup>1</sup>H NMR of Boc-(Me)<sub>2</sub>-lysine-(<sup>13</sup>CHD<sub>2</sub>)<sub>2</sub></i> .....                       | <i>8</i>   |
| <i>Fig. S8 ESI mass spectrum of purified mdCAT</i> .....                                                                               | <i>9</i>   |
| <i>Fig. S9 MALDI-TOF mass spectra of optimized conditions</i> .....                                                                    | <i>10</i>  |
| <i>Fig. S10 MALDI-TOF mass spectra of labeling efficiency</i> .....                                                                    | <i>11</i>  |
| <i>Fig. S11 Box-plot statistical method applied in removing the outliers of the protein ratios of pooled human serum samples</i> ..... | <i>11</i>  |
| <i>Fig. S12 Up- and down-regulated boundaries obtained from statistical model with a confidence interval of 99%</i> .....              | <i>12</i>  |
| <i>Fig. S13 Homogeneity of the quantified serum samples</i> .....                                                                      | <i>12</i>  |
| <i>Fig. S14 Bioinformatic analysis of proteomic profiling from 21 human serum samples</i> .....                                        | <i>13</i>  |
| <i>Fig. S15 GO analysis of the mdCATs quantified differential expression proteins</i> .....                                            | <i>13</i>  |
| <i>Supporting Tables</i> .....                                                                                                         | <i>14</i>  |
| <i>Table S1</i> .....                                                                                                                  | <i>14</i>  |
| <i>Table S2</i> .....                                                                                                                  | <i>97</i>  |
| <i>Table S3</i> .....                                                                                                                  | <i>98</i>  |
| <i>Table S4</i> .....                                                                                                                  | <i>122</i> |
| <i>References</i> .....                                                                                                                | <i>123</i> |

## ***MATERIALS AND METHODS***

### ***Materials and Chemicals***

Formaldehyde (CH<sub>2</sub>O), formaldehyde-d<sub>2</sub> (CD<sub>2</sub>O), formaldehyde-<sup>13</sup>C, d<sub>2</sub> solution (D<sup>13</sup>CDO), 4-(4,6-Dimethoxy-1,3,5-triazin-2-yl)-4-morpholinium tetrafluoroborate (DMTMM), N-methylmorpholine (NMM), sodium cyanoborohydride (NaCNBH<sub>3</sub>), sodium cyanoborodeuteride (NaCNBD<sub>3</sub>), N-alpha-(tert-Butoxycarbonyl)-L-lysine (Boc-lysine-OH), deuterium oxide (D<sub>2</sub>O), dithiothreitol (DTT), iodoacetamide (IAA), acetonitrile (ACN), trifluoroacetic acid (TFA), formic acid (FA), and triisopropylsilane (TIS) were obtained from Sigma-Aldrich (St. Louis, MO). All isotopic reagents for the synthesis of acetylated lysine including acetic anhydrides (acetic anhydride 1,1',2,2'-<sup>13</sup>C<sub>4</sub> and acetic anhydride 1,1'-<sup>13</sup>C<sub>2</sub>) and L-lysine-2HCl (L-lysine-2HCl <sup>13</sup>C<sub>6</sub>, L-lysine-2HCl <sup>13</sup>C<sub>6</sub>, <sup>15</sup>N<sub>2</sub>, L-lysine-2HCl 4,4,5,5-D<sub>4</sub> and L-lysine-2HCl 3,3,4,4,5,5,6,6-D<sub>8</sub>) were purchased from Cambridge Isotopes (Cambridge, MA). Dichloromethane (DCM), N,N-dimethylformamide (DMF), and pyridine was bought from Shanghai Chemical Reagent Co., Ltd. (Shanghai, China). BL21 (DE3)-competent E. coli was from Merck & Co. Inc. Pierce™ BCA Protein Assay Kit was obtained from ThermoFisher Scientific (San Jose, CA). Distilled water was purified with a Milli-Q system (Waters Corp., Milford, MA). Serum samples were generously provided by Department of Clinical Laboratory, Cancer Hospital of Guangxi Medical University. Trypsin for cell culture was acquired from Beijing HuaLishi Technologies Co., Ltd. (Beijing, China). The standard peptides (ESTLHLVLR) were synthesized from TOP-peptide Co., Ltd. (Shanghai, China) with stated purities of >95%. Isotopic mdCATs were purified by one C18 column from HALO.

### ***Synthesis of Mass Defect-based Carboxyl-Active Tag (mdCAT)***

The synthesis of N,N-dimethylated lysine was inspired by previous report.<sup>1</sup> Boc-lysine-OH (246.3 mg, 1 mmol) and sodium cyanoborohydride (NaCNBD<sub>3</sub> or NaCNBH<sub>3</sub>, 4.7 mmol) was dissolved in D<sub>2</sub>O (4.7 mmol NaCNBD<sub>3</sub> in 426.8 μL D<sub>2</sub>O, 4.7 mmol NaCNBH<sub>3</sub> in 440.0 μL D<sub>2</sub>O). Formaldehyde-d<sub>2</sub> (CD<sub>2</sub>O, 1214.7 μL, 20 wt. %) or formaldehyde-<sup>13</sup>C, d<sub>2</sub> solution (D<sup>13</sup>CDO, 1252.3 μL, 20 wt. %) was then dropwisely added on ice. The mixture was stirred at 37 °C for 2 h after cooling down. The target product was purified by silica gel flash column chromatography (MeOH/H<sub>2</sub>O = 95/5) followed by lyophilization to a pale yellow solid. Boc-deprotections were carried out for 30 min at room temperature with TFA/TIS/H<sub>2</sub>O (95/2.5/2.5) and washed with DCM/H<sub>2</sub>O (vol/vol = 3/1). After removing organic layer, the N,N-dimethylated lysine was dried in a rotary evaporator and stored at -20 °C for further use.

N $\alpha$ , N $\epsilon$ -diacetyl-lysine was synthesized from L-lysine-2HCl (L-lysine-2HCl <sup>13</sup>C<sub>6</sub>, L-lysine-2HCl <sup>13</sup>C<sub>6</sub>, <sup>15</sup>N<sub>2</sub>, L-lysine-2HCl 4,4,5,5-D<sub>4</sub> or L-lysine-2HCl 3,3,4,4,5,5,6,6-D<sub>8</sub> dissolved in H<sub>2</sub>O, 1 mmol), acetic anhydride (acetic anhydride 1,1'-<sup>13</sup>C<sub>2</sub>, acetic anhydride, 1,1',2,2'-<sup>13</sup>C<sub>4</sub> or light acetic anhydride, 9.6 mmol), and pyridine (14.1 mmol). After the solution stirred at 0 °C for 20 h, the target molecular was washed with ACN ( 10 mL, 3 times) and lyophilized under reduced pressure.

The synthetic procedure leading to the peptide bond of mdCAT included formation of N-triazinylammonium tetrafluoroborate by treating N $\alpha$ , N $\epsilon$ -diacetyl-lysine (239.1 mg, 1 mmol) with appropriate DMTMM (328.1 mg, 1mmol, dissolved in 6.6 mL DMF) and NMM (328.1 μL ) 2 h at 0 °C, followed by the addition of the N,N-dimethylated lysine (217.3 mg, 1.2 mmol) at room temperature for another 8 h. After the solvent evaporating in vacuum, the residue was purified by a C18 column to give mdCATs as transparent solid. The general synthetic procedures are shown in Table 1.

### ***Purification and Detection of MdCAT reagents***

The synthesized mdCATs were purified with C18-HPLC (Buffer A: water, 0.1% TFA; gradient: 0-20 mins 100% A; flow rate: 1 mL/min). After separating, they were injected into electrospray ionization (ESI)-based LTQ Orbitrap XLTM (Thermo Fisher Scientific, San Jose, CA) with a gas flow rate of Sheath gas 10 and Aux gas 5, then detected under positive ion mode. The duration of each injection was set as 0.80 min and the analyzer was calibrated every single day using Pierce™ Reserpine Standard for LC-MS (ThermoFisher Scientific). The instrument was set to complete a full mass scan from mass-to-charge ratio (m/z) range of 100-1000 with resolution of 60 000 (m/z at 400) in the Orbitrap without setting higher energy C-trap dissociation (HCD) for further fragmentation.

### ***Sample Selection and Preparation***

Serum samples (nine healthy individuals and twelve liver cancer patients) used in this study were generously provided by Department of Clinical Laboratory, Cancer Hospital of Guangxi Medical University. All samples were selected with no bias and quantified with codes (such as 1HC, 2HC and so on) to hide the specific information of patients. The overall study was reviewed and approved by the SHAPHC Ethic Committee (approved no. 2019(KY-E-18)). Human serum samples and BL21 (DE3) were resuspended in lysis buffer containing 8 M urea, 1× Halt Protease, and inhibitor cocktail for 20 min on ice and sonicated at 4 °C (five pulses for 10 s, 35% power). The supernatant of the lysates was collected after centrifugation (14000 rcf, 20 min at 4 °C). Then the protein samples were diluted to 2 mg/mL with 50 mM ammonium bicarbonate buffer. After reducing by 10 mM DTT at 56 °C for 1h, the free thiol were alkylated by 30 mM IAA in darkness for 30 min at room temperature. Samples were then digested by trypsin with enzyme-substrate ratio of 50:1 at 37 °C for 16 h. Solvent of these tryptic peptides were evaporated by lyophilizer after desalting and stored at -20 °C.

### ***Sample Labeling***

To the reaction vessel, 24 µg mdCAT and 6.6 µg DMTMM was dissolved in 20 µL DMF, followed by addition of 1 µL NMM. After stirring the mixture at 0 °C for 2 h, the in situ N-triazinylammonium tetrafluoroborate were formed, which were then transferred to the sample vial containing 1 µg digests for another 4 h at 37 °C.

### ***Matrix-Assisted Laser Desorption Ionization Time-Of-Flight Mass Spectrometry (MALDI-TOF MS)***

#### ***Analysis***

The synthesized peptides before and after mdCATs labeling were examined by MALDI-TOF MS. CHCA matrix was dissolved in 50% ACN and 0.1% TFA at a concentration of 5 mg/mL. Samples and matrix (1 µL each) were spotted on a target plate for MS analysis. Myoglobin proteolytic peptides were used for mass calibration. All MALDI-TOF MS assays were carried out on a 5800 Proteomics Analyzer (AB SCIEX) in positive mode with a Nd: YAG laser at 355 nm, setting 400 Hz repetition rate and 20 kV acceleration voltage.

### ***Liquid Chromatography Tandem Mass Spectrometry Analysis***

Mass spectrometric acquisition of equally mixed E. coli sample set: Digested samples labeling mdCATs were mixed at equal ratio by weight and dried in vacuo. After reconstituting in buffer (98% H<sub>2</sub>O, 2% ACN and 0.1% FA), each sample was injected onto a C18 reversed-phase analytical column (Acclaim PepMap C18, 100Å 75 µm × 25 cm) in mobile phase A (0.1% FA in water) and gradient-eluted with mobile phase B (0.1% FA in ACN). Eluted peptides were analyzed by liquid chromatography tandem mass spectrometry (LC-MS/MS) detection system, which is consisted of a nanoflow high-performance liquid chromatograph (HPLC) Easy nLC System (Thermo Fisher Scientific, San Jose, CA) coupled to an Orbitrap Fusion mass spectrometer (Thermo Fisher Scientific, San Jose, CA).

A total of 120-min gradient were employed to elute the equal ratio of 8-plex experiments (started from 2% to 5% buffer B within 5 min, then linearly increased to 25% buffer B within 110 min, 25% to 45% buffer B within 110 min, followed by raising buffer B to 90% within 4 min and holding for 2 min, returned back to 2% phase B within 1 min). Before DIA quantification, a comprehensive spectral library was constructed using DDA mode. For all DDA assays, fourier-transform ion cyclotron resonance (FTICR) full-scan was performed from m/z 350 to 1250 with automatic gain control (AGC) target of  $1 \times 10^6$  and maximum injection time (IT) of 50 ms at a resolution of 15 K to identify peptides. Precursors were selected at top speed mode within cycle time of 3 s and subjected to dynamic exclusion of 20 s with a  $\pm 0.01$  m/z tolerance. The filtered precursors were triggered by high-energy collisional dissociation (HCD) MS/MS fragmentation using a 30% normalized collision energy (NCE), followed by scanning in Orbitrap with AGC target of  $1 \times 10^6$  and an IT of 80 ms at 15000-resolving power to enlarge the scale of identified peptides/proteins. In contrast, the mdCATs DIA analysis had an additional quantitative resolving power (500 K at 200 m/z) performing after the survey scan with AGC target of  $1 \times 10^6$  and maximum injection time (IT) of 100 ms. The assay used ten optimized discrete ranges in total: 350-576 m/z, 576-642 m/z, 642-693 m/z, 693-754 m/z, 754-805 m/z, 805-856 m/z, 856-907 m/z, 907-989 m/z, and 989-1250 m/z. For both DDA and DIA experiments the pre-filtration mode was enabled that only charge states from 2 to 5 could be eluted for MS/MS sampling. The data type was centroid.

Mass spectrometric acquisition of unequally mixed E. coli and human serum sample set: For the Easy nLC setup, 2  $\mu$ g of each mixed sample was reconstituted in buffer (98% H<sub>2</sub>O, 2% ACN and 0.1% FA) and separated using one column setup with an Acclaim PepMap C18 2  $\mu$ m column of 75  $\mu$ m 250 mm dimensions (Thermo Scientific) on an EASY-nLC™ 1200 system (Thermo Scientific) connected to an Orbitrap Exploris™ 480 Mass Spectrometer (Thermo Scientific). The gradient of capillary flow LC-MS was set as follows: the flow rate was kept 300 nL/min through a 120 min segmented gradient (2%-30% buffer B to 100 min, 30%-50% buffer B from 100 min to 114 min, sharply increased to 100% buffer B within 1 min and held for 5 min). The DDA method consisted of MS1 scan from 350 to 1600 m/z at 120 K resolution with AGC target of 300 and cycle time of 1.7 s. Then, precursors with charge states 2- 6 were included and fragmented at 30% HCD. And the quadrupole isolation width was set to 1.6 m/z for DDA. Correspondingly, the DIA segments were setup with MS1 scan from 350 to 1600 m/z at 120 K resolution and triggered at 33 % HCD, followed by MS2 at 480 K resolution with AGC target of 200 and custom maximum injection time. As for the quantitative proteomes of multiple human liver serum samples, the discrete ranges were adjusted as follows: 350-526 m/z, 526-594 m/z, 594-646 m/z, 646-693 m/z, 693-746 m/z, 746-796 m/z, 796-848 m/z, 848-912 m/z, 912-998 m/z, and 998-1600 m/z. Either Orbitrap (FT) detectors of Orbitrap Exploris™ 480 Mass Spectrometer or Orbitrap Fusion mass spectrometer were calibrated by Pierce™ FlexMix™ Calibration Solution (ThermoFisher Scientific (San Jose, CA)). The electrospray voltage of 2.3 kV versus the inlet of the mass spectrometer was used. All DDA and DIA assays were performed alternatively to minimize errors.

### **Data Analysis**

The acquired DDA MS raw files were processed using Proteome Discovery (PD, version 1.4.1.12, Thermo Electron Corp.) with the Mascot (version 2.3.0) nodes integrated, searching against a target-decoy database (Swissprot human database (released in January 2017; Homo sapiens, 20,129 entries) or the Swissprot E. coli database (released in June 2019; 3,607 entries, <http://www.uniprot.org/> ). Searching parameters were set as follows: the lowest isotopic mdCAT tag (A2 (+382.2884 Da), which incorporated seven <sup>13</sup>C, two <sup>2</sup>H, and two <sup>15</sup>N atoms) on peptide N-termini and lysine (K) residues, a 50 ppm precursor mass tolerance, a fragment mass tolerance of 0.5 Da, a maximum of two missing cleavages with trypsin enzyme, a validation with q-values to a false discovery rate (FDR) of 1% or less, and validation based on q-value. The comprehensive DDA spectral library was completely constructed by exporting files (.fasta) from PD. Then, Skyline (version 4.1, Seattle, WA) was used to extract targeted mass spectra from the each DIA.raw data, precursors with unknown or single charge were excluded for further search. Quantifications of b/y fragment

ions, Skyline script arguments included the following: a MS/MS filtration of predicted RT  $\pm$  3min, a MS1 resolution of 120 K (60 K for equally mixed E. coli peptides), a MS2 resolution of 480 K (500 K for equally mixed E. coli peptides), the heaviest isotopic mdCAT (B2 (+382.3302 Da)) gauged as base, and the appropriate heavy isotopic mdCATs (the specific label schemed in Table 1, A1 (+382.3127 Da), A2 (+382.2884 Da), B1 (+382.2942 Da), C1 (+382.3010 Da), C2 (+382.3069 Da), D1 (+382.3185 Da), D2 (+382.3244 Da) ). For all samples, oxidation of methionine residues (+15.9950 Da) and carbamidomethylation of cysteine residues (+57.0215 Da) were searched as variable and fixed modifications, respectively.

### ***Quantification***

After extracting fragments from the Skyline pre-established spectral library, the exported ion ratios were assigned to quantify corresponding peptides and the resolved pairs with ratio = 1 were required to drop to be eligible for peptides/protein quantification. Then, we employed an in-house programmed script to impute the missing value (< 50%) with K-Nearest Neighbors (KNN) on these peptides.<sup>2,3</sup> Two peptides belonging to one protein were averaged to give the protein quantification ratio. Otherwise, quantitative protein measurements were acquired from the median ratios of all relative peptides. To assess the batch effects in our proteomic profiling quantifications, we implement Python V 3.7.3 to figure the hierarchical clustering and principal component analyses in terms of these two variables: batch identity and sample type (healthy individuals and liver cancer patients).

For gauging protein ratio boundaries of mdCAT DIA strategy, we equally mixed the pooled serum sample and processed the whole workflow in triplicate. Kolmogorov–Smirnov test was applied to conforming the normal distribution of protein data, of which outliers had been removed by box-plot statistical method. A confidence interval of 99% was established in the statistical subsequently model to obtain the up- and down-regulated boundaries.

## Supporting Figures

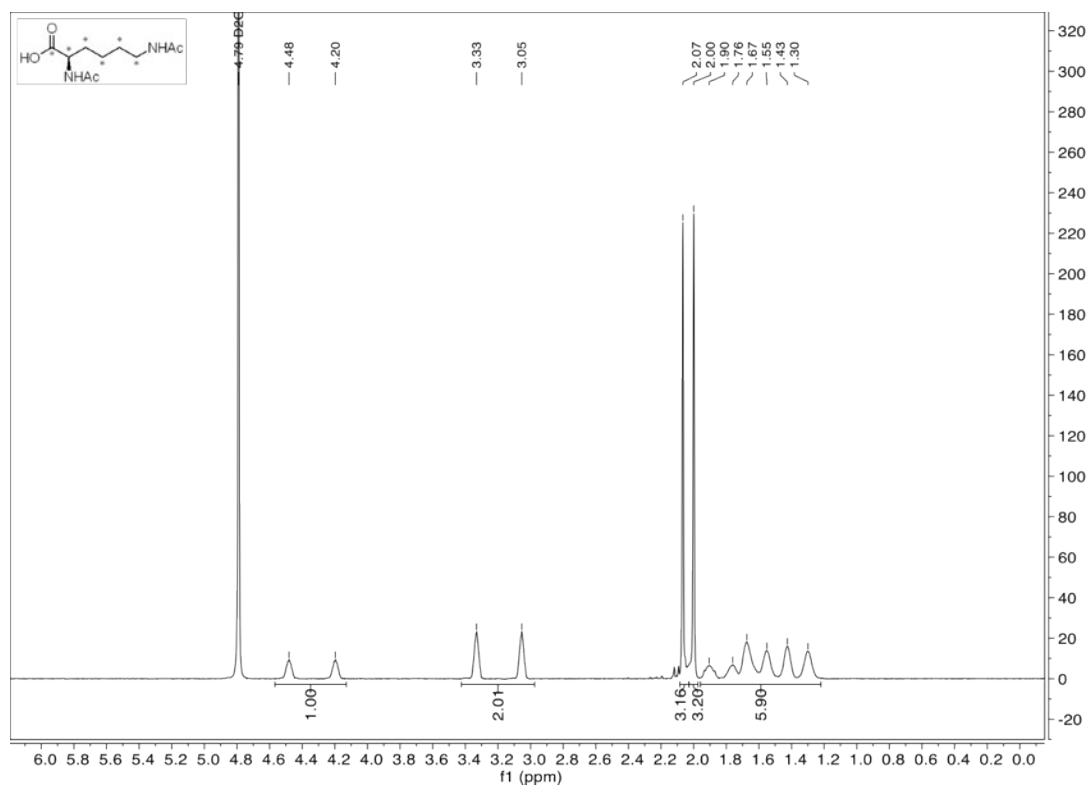

**Fig. S1**  $^1\text{H}$  NMR of  $(\text{Ac})_2\text{-lysine } ^{13}\text{C}_6 \text{ } ^{15}\text{N}_2$ .  $^1\text{H}$  NMR (500 MHz,  $\text{D}_2\text{O}$ )  $\delta$  4.34 (d,  $J = 142.3$  Hz, 1H), 3.19 (d,  $J = 138.4$  Hz, 2H), 2.07 (s, 3H), 2.00 (s, 3H), 1.23–1.95 (m, 6H).

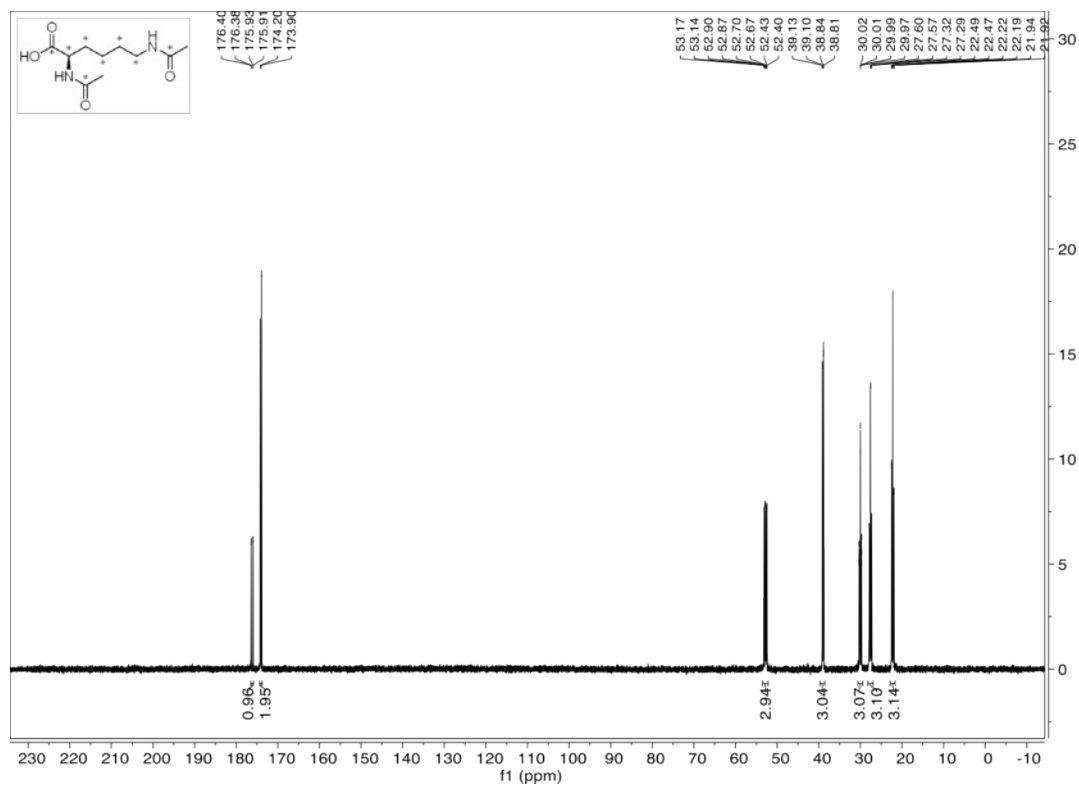

**Fig. S2**  $^{13}\text{C}$  NMR of  $(\text{Ac})_2\text{-lysine } ^{13}\text{C}_6 \text{ } ^{13}\text{C}_2$ .  $^{13}\text{C}$  NMR (126 MHz,  $\text{D}_2\text{O}$ )  $\delta$  176.2 (dd,  $J = 58.6, 2.8$  Hz), 174.2, 173.9, 52.8 (ddd,  $J = 58.4, 34.0, 3.8$  Hz), 39.0 (dd,  $J = 36.0, 4.4$  Hz), 30.0 (tdd,  $J = 34.4, 4.6, 2.0$  Hz), 27.6 (td,  $J = 35.4, 4.0$  Hz), 22.2 (td,  $J = 34.8, 2.9$  Hz).

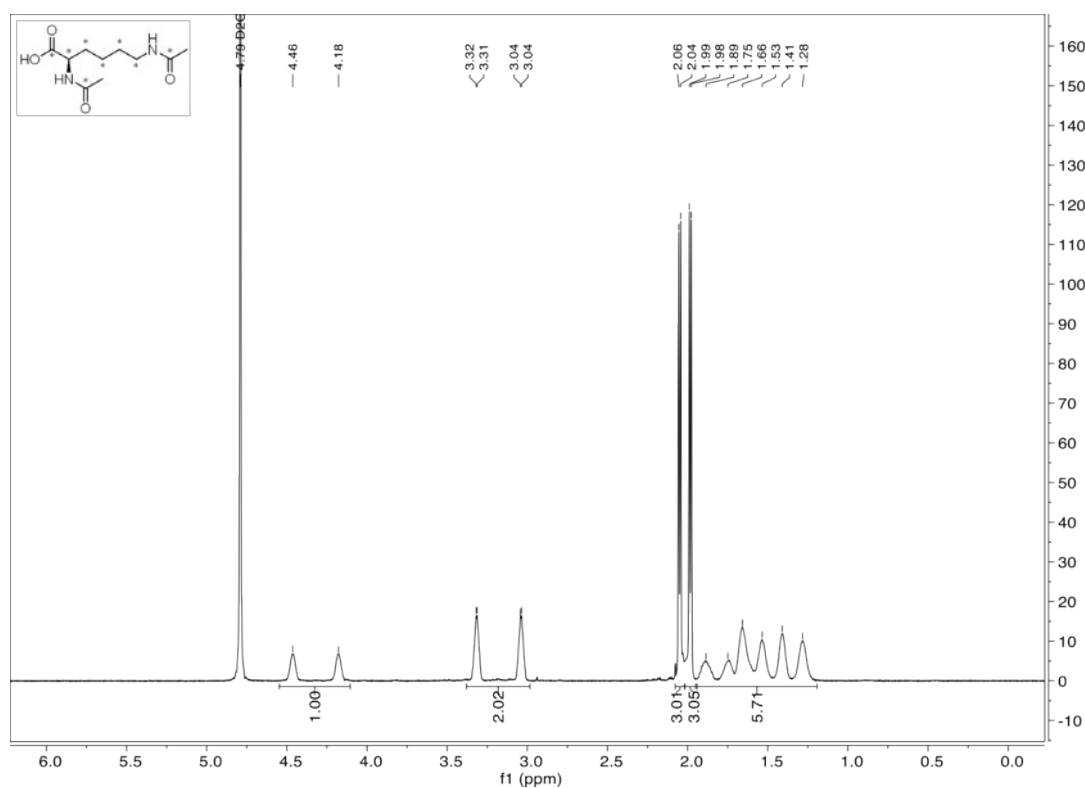

**Fig. S3**  $^1\text{H}$  NMR of  $(\text{Ac})_2\text{-lysine } ^{13}\text{C}_6 \text{ } ^{13}\text{C}_2$ .  $^1\text{H}$  NMR (500 MHz,  $\text{D}_2\text{O}$ )  $\delta$  4.32 (d,  $J = 142.3$  Hz, 1H), 3.18 (dd,  $J = 138.2, 3.4$  Hz, 2H), 2.05 (d,  $J = 6.1$  Hz, 3H), 1.98 (d,  $J = 6.0$  Hz, 3H), 1.21–1.94 (m, 6H).



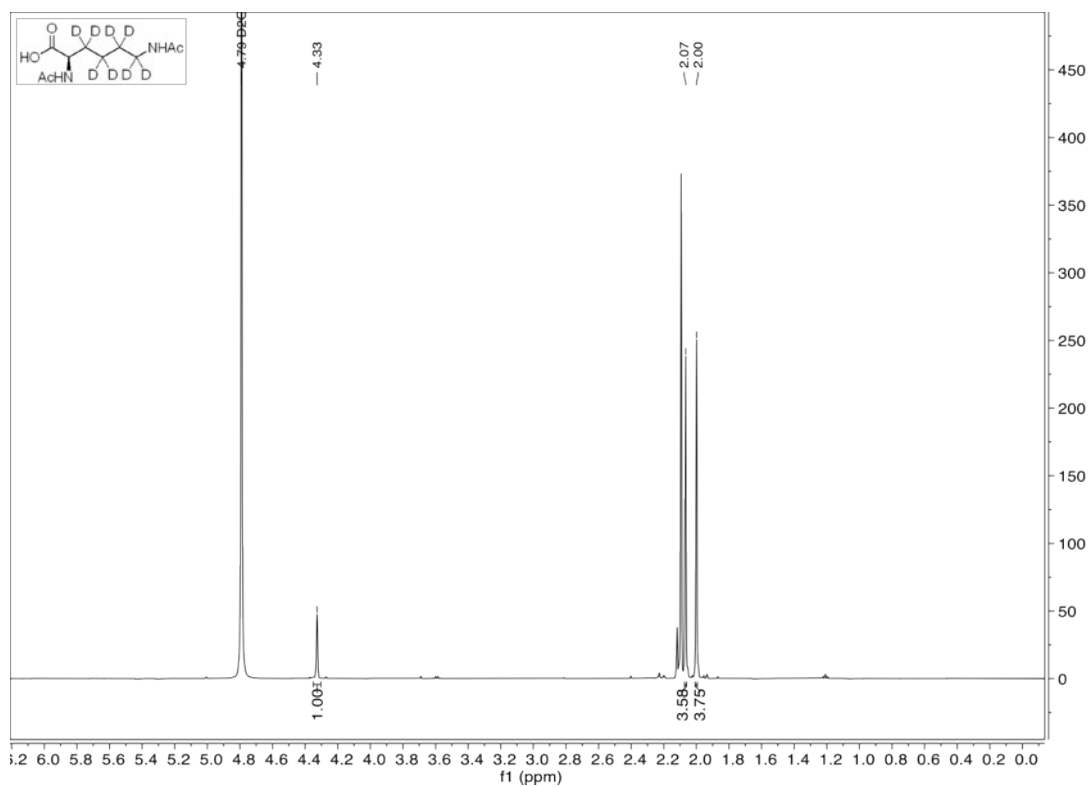

**Fig. S4**  $^1\text{H}$  NMR of  $(\text{Ac})_2$ -lysine  $\text{D}_8$ .  $^1\text{H}$  NMR (500 MHz,  $\text{D}_2\text{O}$ )  $\delta$  4.33 (s, 1H), 2.07 (s, 3H), 2.00 (s, 3H).

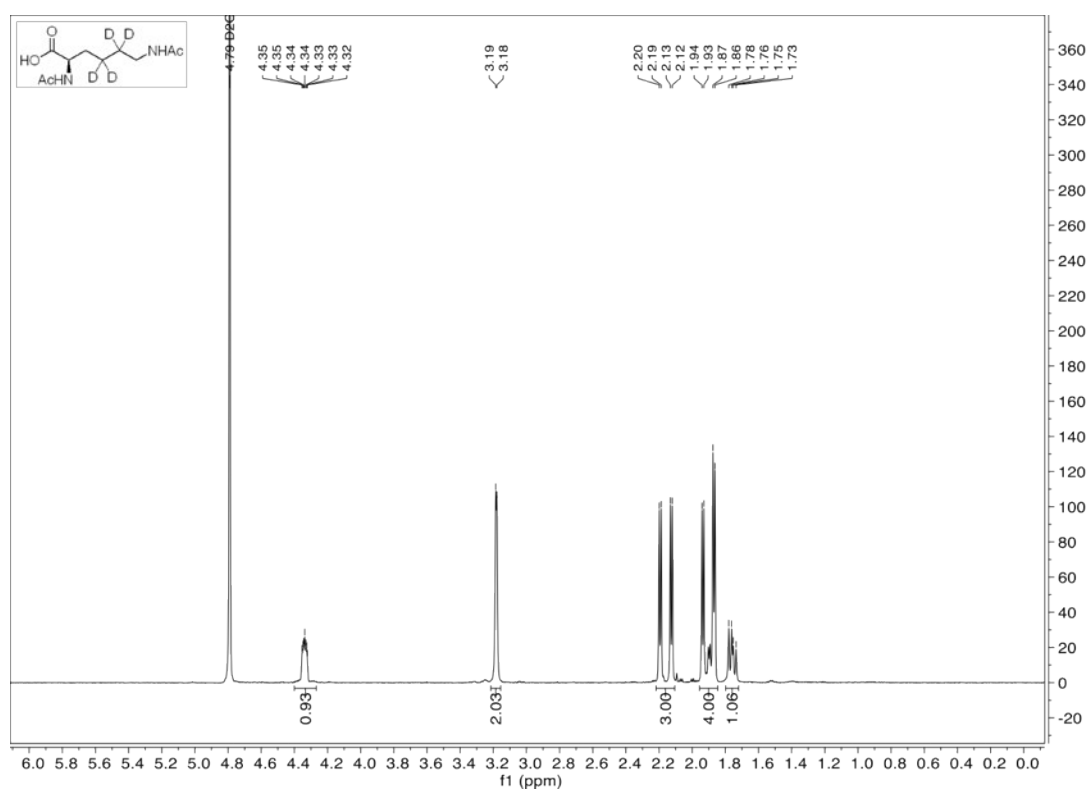

**Fig. S5**  $^1\text{H}$  NMR of  $(\text{Ac})_2$ -lysine  $\text{D}_4$   $^{13}\text{C}_4$ .  $^1\text{H}$  NMR (500 MHz,  $\text{D}_2\text{O}$ )  $\delta$  4.34 (ddd,  $J = 8.4, 5.1, 2.6$  Hz, 1H), 3.18 (d,  $J = 3.6$  Hz, 2H), 2.16 (dd,  $J = 33.7, 6.1$  Hz, 3H), 1.85–1.95 (m, 4H), 1.72–1.79 (m, 1H).

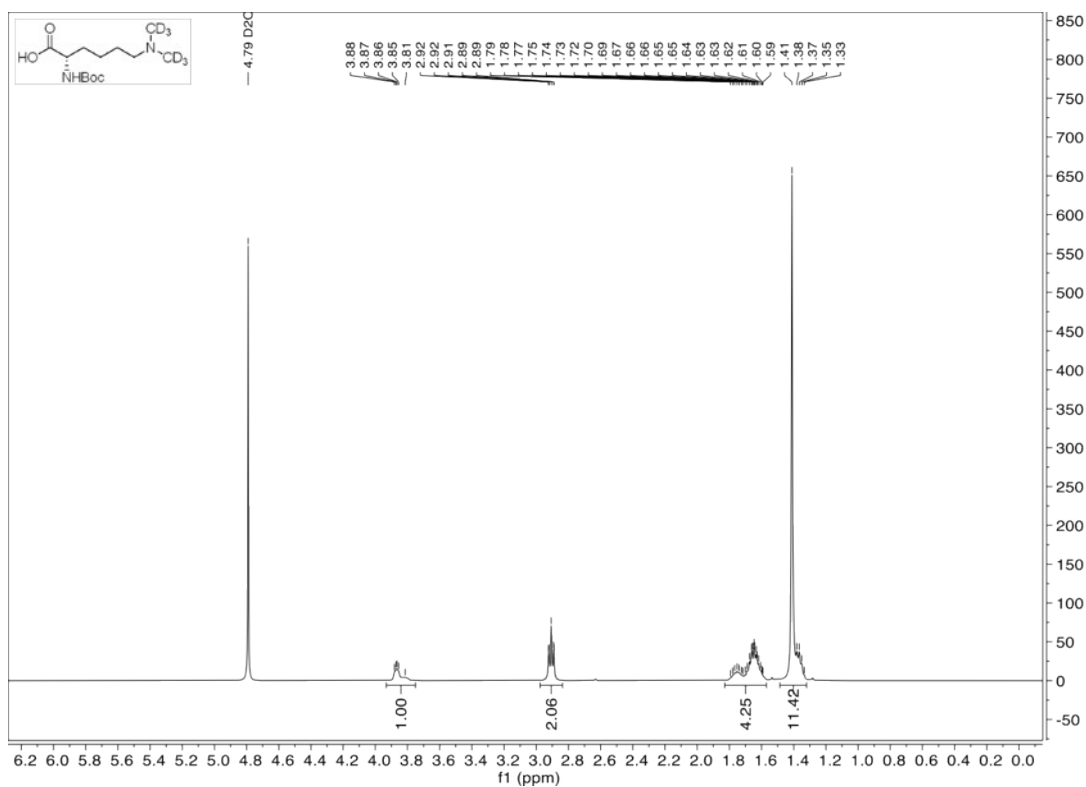

**Fig. S6**  $^1\text{H}$  NMR of Boc-(Me)<sub>2</sub>-lysine 2\*CD<sub>3</sub>.  $^1\text{H}$  NMR (500 MHz, D<sub>2</sub>O)  $\delta$  3.76–3.93 (m, 1H), 2.86–2.96 (m, 2H), 1.57–1.81 (m, 4H), 1.41 (m, 11H).

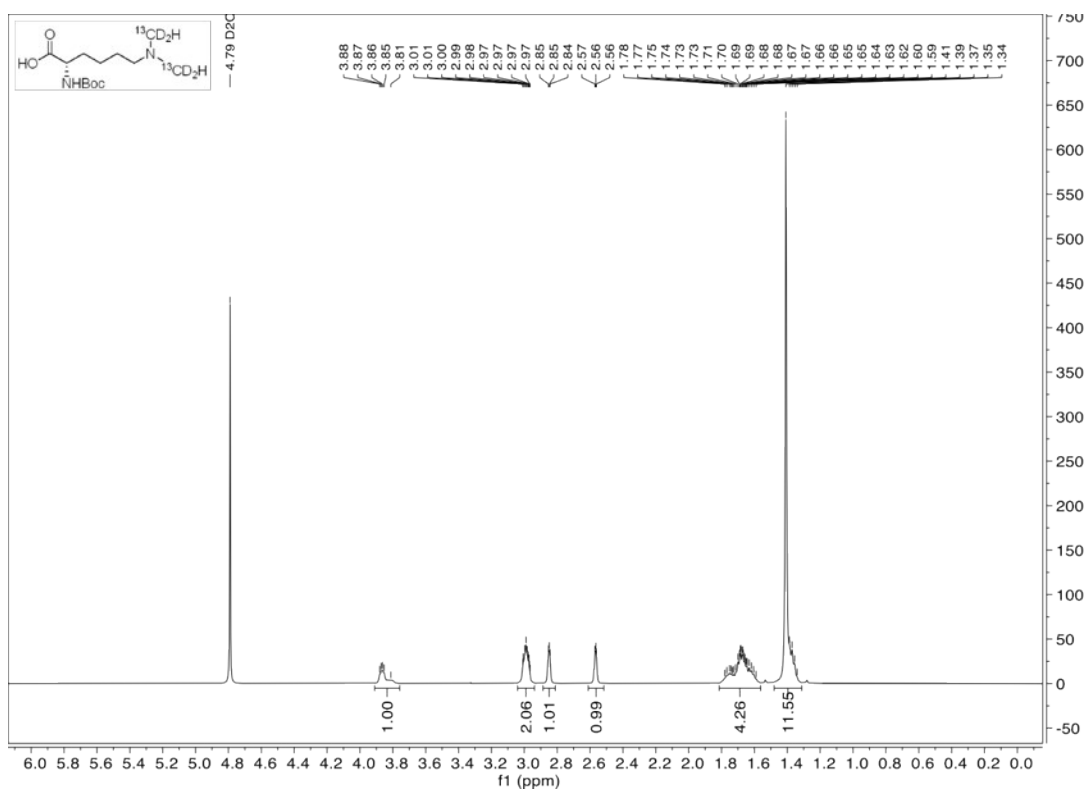

**Fig. S7**  $^1\text{H}$  NMR of Boc-(Me)<sub>2</sub>-lysine-(<sup>13</sup>CHD<sub>2</sub>)<sub>2</sub>.  $^1\text{H}$  NMR (500 MHz, D<sub>2</sub>O)  $\delta$  3.77–3.92 (m, 1H), 2.96–3.02 (m, 2H), 2.83–2.87 (m, 1H), 2.55–2.58 (m, 1H), 1.59–1.79 (m, 4H), 1.41 (m, 11H).

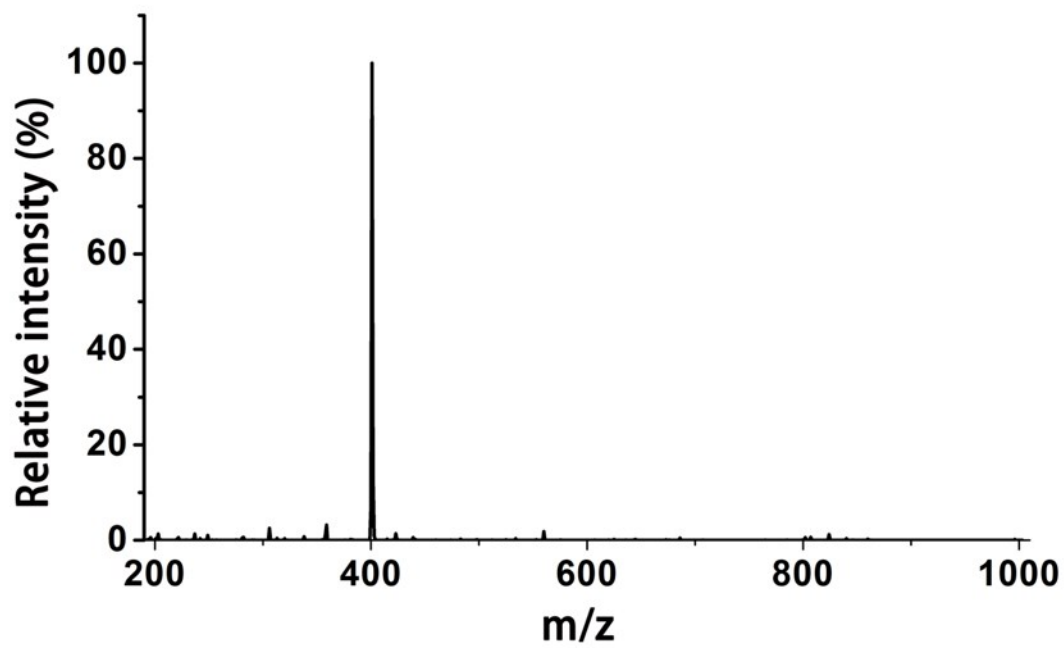

*Fig. S8* ESI mass spectrum of purified mdCAT.

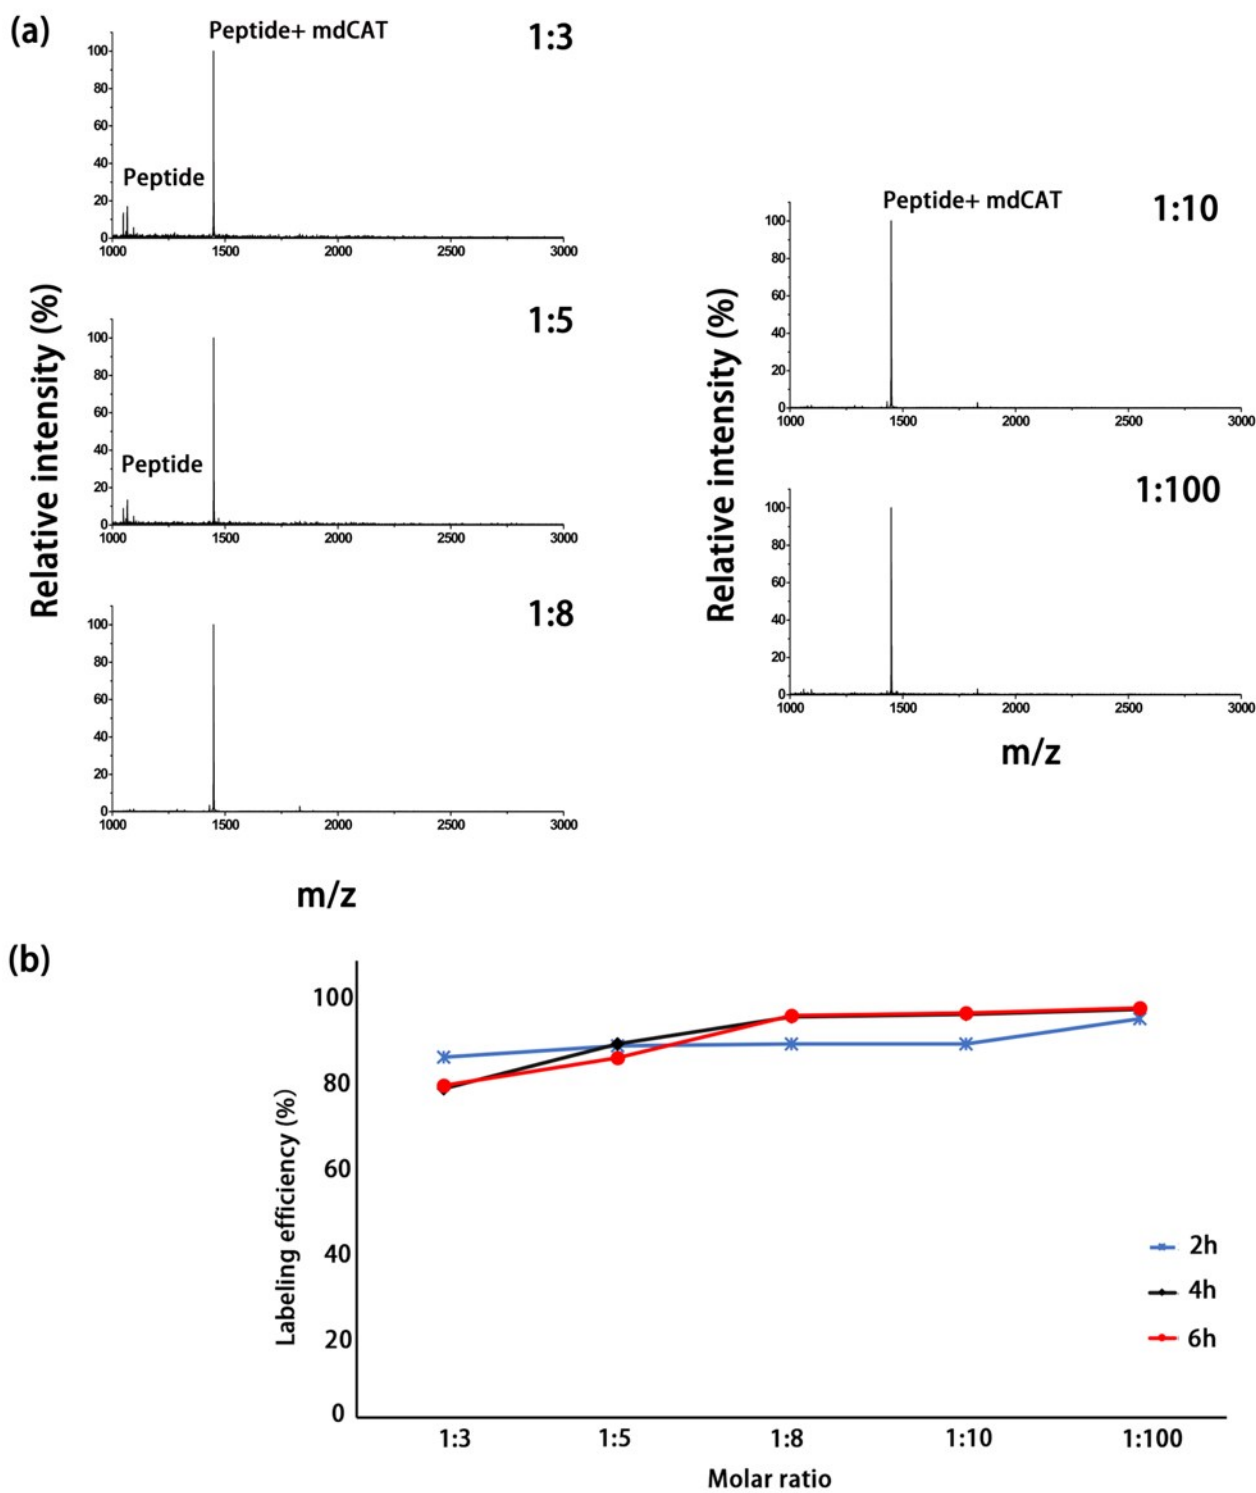

**Fig. S9** (a) MALDI mass spectra of the reaction between ESTLHLVLR and derivatized lysine with different molar ratios for 4 h. (b) The labeling efficiency of derivatized lysine with different molar ratios of ESTLHLVLR.

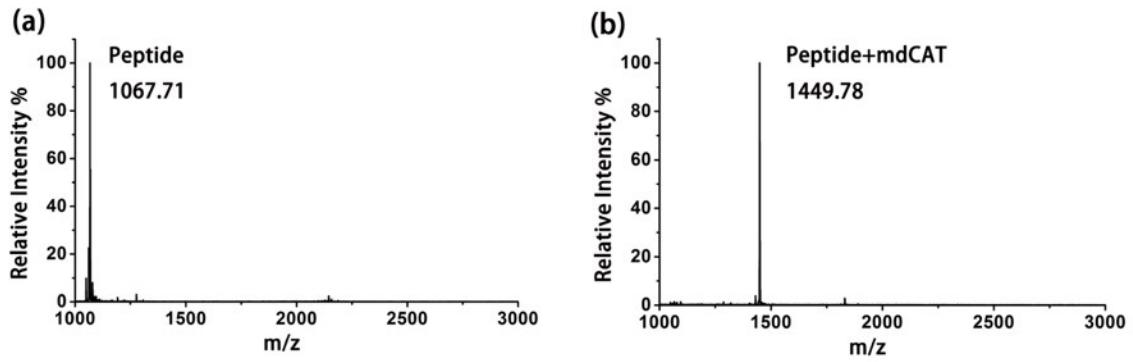

**Fig. S10** MALDI-TOF mass spectra of synthesized peptide ESTLHLVLR (a) before and (b) after mdCAT labeling.

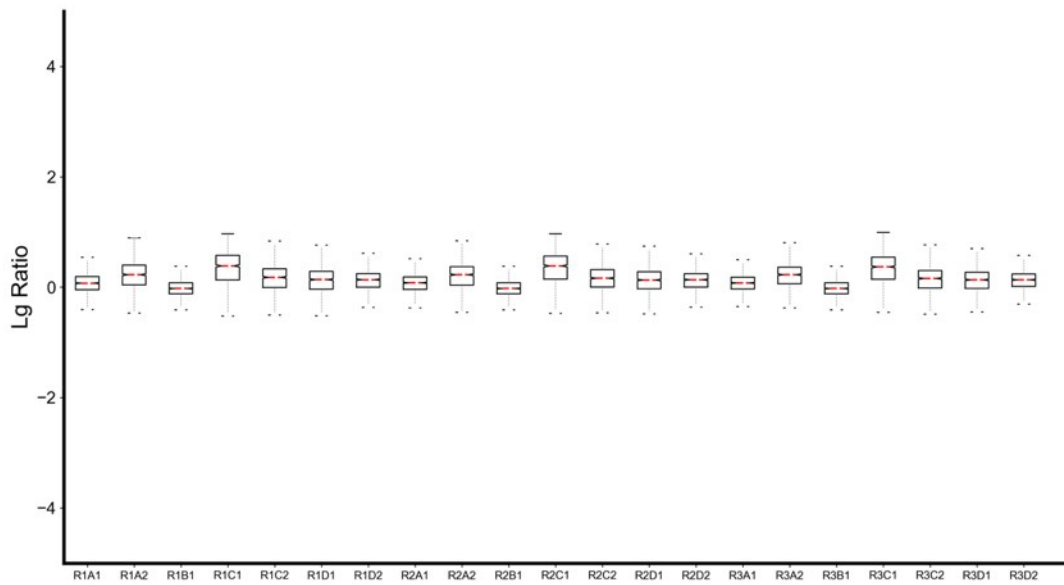

**Fig. S11** Box-plot statistical method applied in removing the outliers of the protein ratios of pooled human serum samples mixed at equal ratio across all three technical replicates.

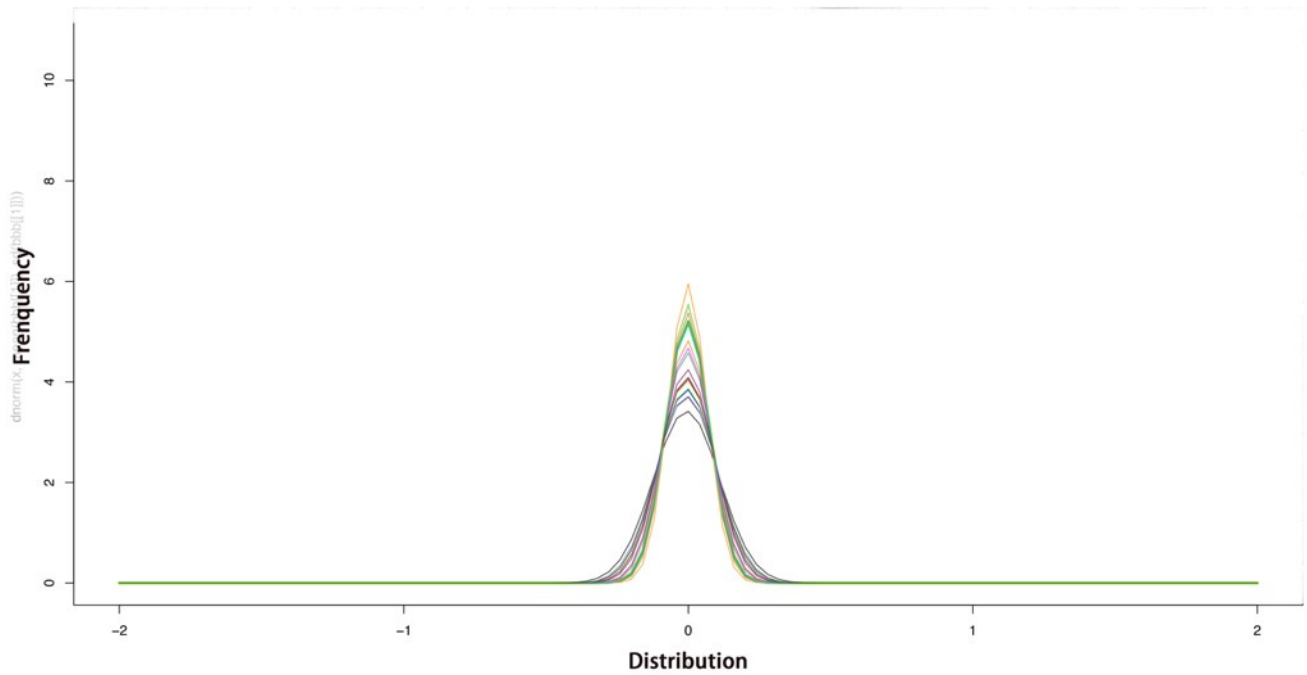

**Fig. S12** Up- and down-regulated boundaries obtained from statistical model with a confidence interval of 99%. Quantitative data were generated by pooled human serum samples mixed at equal ratio across all three technical replicates after removing the outliers of the protein ratios by the box-plot statistical method.

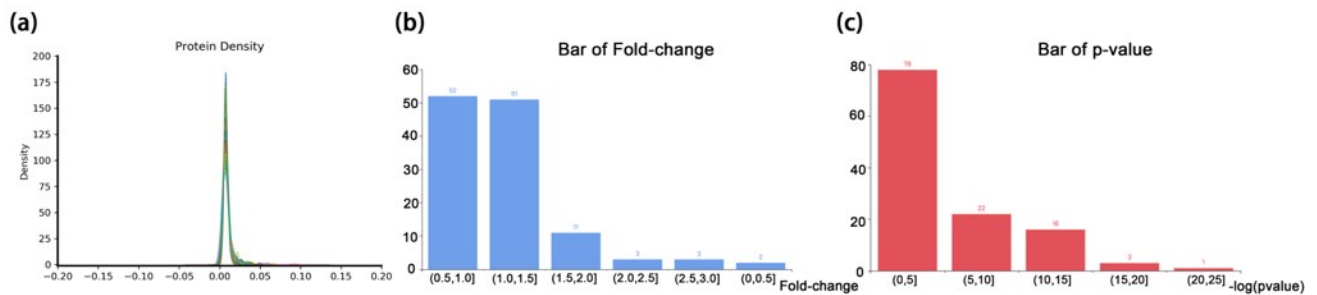

**Fig. S13** Homogeneity of the quantified serum samples. (a). Curves (n=21) show the density of normalized protein ratios. (b) (c). Histograms demonstrate the distribution of fold change and p-value (across  $-\log_2$ ) quantitative ratios. Quantitative data were generated by 21 human serum samples mixed at equal ratio across all three technical replicates.

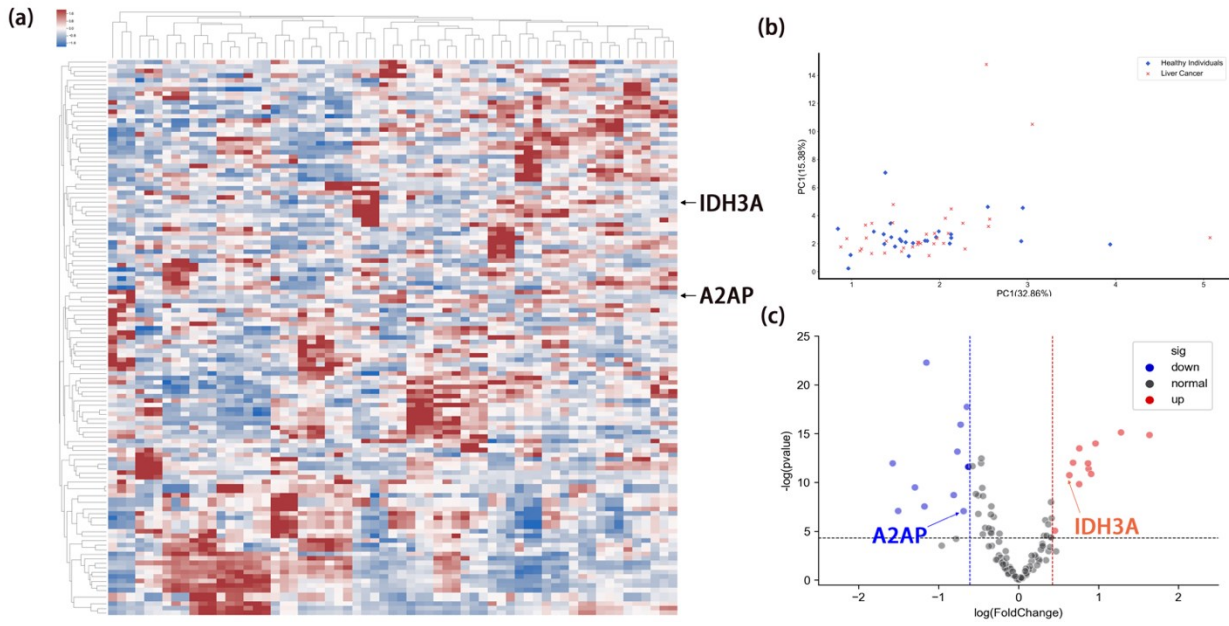

**Fig. S14** (a) Clustering analysis of proteomic profiling quantifies 21 human serum samples mixed at equal ratio: 9 healthy individuals and 12 liver cancer patients. All these serum samples were pooled and calculated as the base of quantified ratio. The heat map depicts the relative abundance of signature proteins. (b) Principal component analysis of proteomic profile according to sample types (blue, healthy individuals = 9; red, liver cancer patients = 12; n = 3). Quantitative data were generated by 21 human serum samples mixed at equal ratio across triplicates. (c) Volcano plot distribution of quantified equally mixed serum proteins (cancer serum compared against healthy serum; FDR = 0.05; n = 3). Proteins with striking difference are highlighted in red and blue (red, up-regulated proteins; blue, down-regulated proteins; arrows, proteins approved by FDA).

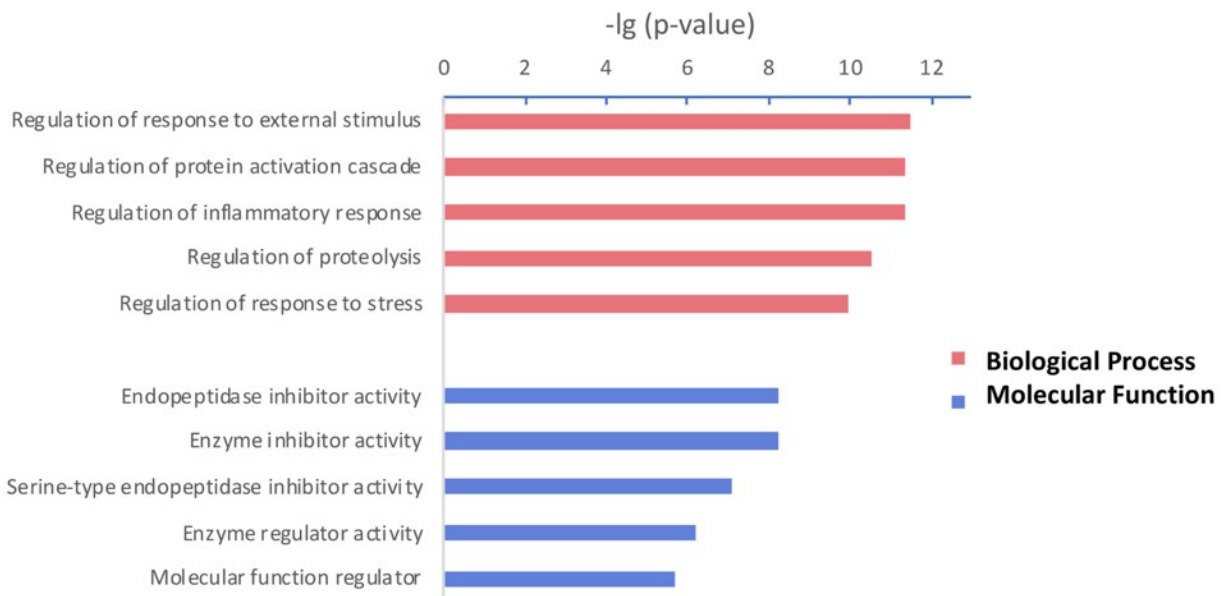

**Fig. S15** GO analysis of the mdCATs quantified differential expression proteins in terms of biological process (red), molecular function (blue).

## Supporting Tables

**Table S1** The mdCATs DIA quantification results of equally mixed *E.coli*.

| Pro_Sequence                        | R1A1/R1  | R1D2/R1  | R1C1/R1  | R1A2/R1  | R2A1/R2  | R2D2/R2 | R2C1/R2  | R2A2/R2  | R3A1/R3  | R3D2/R3 | R3C1/R3  | R3A2/R3  |
|-------------------------------------|----------|----------|----------|----------|----------|---------|----------|----------|----------|---------|----------|----------|
|                                     | D1       | B2       | C2       | B1       | D1       | B2      | C2       | B1       | D1       | B2      | C2       | B1       |
| sp P61517 CAN_ECOLI-DLDVTATNR       | 0.602757 | 1.6779   | 0.449308 | 0.346121 | 0.751655 | 1.6779  | 0.178971 | 0.433281 | 0.809753 | 1.471   | 0.199015 | 0.574026 |
| sp A7ZSL0 RS10_ECO24-TVDALMR        | 0.816311 | 0.866251 | 0.972618 | 3.968798 | 0.816311 | 1.2445  | 0.84958  | 6.098094 | 0.816311 | 1.2445  | 0.736883 | 10.88323 |
| sp A7ZV73 RS18_ECO24-YLSLLPYTDR     | 2.009617 | 1.72175  | 0.734812 | 0.276771 | 1.328801 | 1.57245 | 0.72995  | 0.252309 | 1.01653  | 1.57245 | 0.913182 | 0.155672 |
| sp A7ZJA8 SUCC_ECO24-DQSQEDPR       | 0.723224 | 5.316468 | 1.911921 | 0.548941 | 1.540292 | 8.798   | 0.72094  | 0.783806 | 15.14943 | 6.8342  | 1.761875 | 0.586684 |
| sp P27298 OPDA_ECOLI-ETGQSFLDNILSR  | 1.126187 | 0.2903   | 0.648728 | 0.835888 | 0.821757 | 0.3787  | 1.25087  | 1.751874 | 0.821757 | 0.3787  | 1.25087  | 1.704671 |
| sp P37902 GLTI_ECOLI-ESSVPFSYDNQQK  | 1.203248 | 1.24255  | 0.328474 | 1.851984 | 1.009774 | 1.24255 | 0.332982 | 0.604645 | 0.842236 | 1.1762  | 1.196733 | 1.178111 |
| sp P0ACE8 HINT_ECO57-IAEQEGIAEDGYR  | 1.063408 | 0.8218   | 0.995383 | 1.056544 | 0.741156 | 1.23855 | 1.132239 | 0.61536  | 0.918473 | 1.0861  | 1.160941 | 0.894099 |
| sp A8A6H0 TNAE_ECOHS-KYDIPVVMDSAR   | 1.051659 | 0.4745   | 1.030527 | 1.645149 | 0.668187 | 0.5386  | 0.715616 | 1.247182 | 1.336283 | 0.5386  | 0.893903 | 2.341378 |
| sp B1IUY2 SYA_ECOLC-VDEAGFEAAMEEQR  | 5.658725 | 1.1765   | 0.801069 | 0.710997 | 5.153502 | 1.1765  | 1.150311 | 0.764101 | 3.254871 | 1.1765  | 1.150311 | 0.348127 |
| sp P00968 CARB_ECOLI-GLEVGATGFDPK   | 0.373867 | 0.89005  | 1.027649 | 0.537858 | 1.222476 | 1.11    | 0.440535 | 0.497646 | 1.440344 | 1.11    | 0.48884  | 0.524481 |
| sp P23843 OPPA_ECOLI-IEGVPEsnISR    | 3.277485 | 0.92065  | 2.23434  | 0.912778 | 2.25023  | 0.98115 | 3.040223 | 0.754125 | 1.224153 | 0.7818  | 3.012211 | 0.75604  |
| sp P0A6Z5 HTPG_ECO57-ALTPFIDR       | 4.017543 | 0.1426   | 6.319167 | 2.188818 | 2.352383 | 1.659   | 4.942408 | 2.847001 | 2.352383 | 3.1754  | 4.942408 | 2.066078 |
| sp P0AC39 ASPA_ECOL6-EVPADAYYGvHTLR | 2.287717 | 0.7853   | 0.918682 | 4.42802  | 1.07988  | 1.0004  | 1.169929 | 2.897045 | 2.279601 | 0.90135 | 0.668464 | 1.633932 |



|                                        |          |          |          |          |          |          |          |          |          |          |          |          |
|----------------------------------------|----------|----------|----------|----------|----------|----------|----------|----------|----------|----------|----------|----------|
| sp P0AC39 ASPA_ECOL6-EYSPLAVK          | 2.530987 | 0.875    | 0.866103 | 0.607757 | 2.476624 | 0.875    | 0.856804 | 0.620041 | 1.816819 | 1.0961   | 0.867844 | 0.890649 |
| sp P06999 PFKB_ECOLI-FVMPGAALNEDEFR    | 25.73592 | 0.8919   | 0.78728  | 0.937402 | 16.70139 | 1.658    | 0.353667 | 1.105494 | 16.70139 | 1.658    | 0.439632 | 2.072348 |
| sp P69778 LPP_ECO57-LDNMATK            | 2.343006 | 0.6109   | 8.854937 | 1.936954 | 3.047196 | 0.8261   | 4.904566 | 1.108849 | 3.042356 | 0.8261   | 4.904566 | 1.009052 |
| sp P0A6Y9 DNAK_ECOL6-FQDEEVQR          | 0.121775 | 1.89645  | 0.986109 | 3.271861 | 0.239673 | 1.1059   | 1.295214 | 1.7737   | 0.576238 | 0.93955  | 0.82227  | 1.451345 |
| sp P63285 CLPB_ECO57-IVAVQ             | 1.747421 | 0.3801   | 7.085307 | 1.117244 | 1.747421 | 0.7239   | 2.240229 | 0.852339 | 2.521486 | 1.0665   | 1.912838 | 1.285477 |
| sp P0A863 TPX_ECOL6-AQTFTLVAK          | 0.590042 | 0.83075  | 0.885496 | 0.797592 | 0.785825 | 1.06     | 0.601531 | 0.797592 | 0.535684 | 1.0869   | 0.582638 | 0.520008 |
| sp P64583 YQJD_ECO57-LGETGDIAIK        | 0.91827  | 0.4595   | 0.291884 | 0.987943 | 2.10324  | 0.70255  | 0.387778 | 0.505741 | 1.910388 | 1.33705  | 0.632439 | 0.498767 |
| sp P08839 PT1_ECOLI-ISADQVDQEVER       | 0.753906 | 1.983011 | 0.877798 | 2.195195 | 1.31359  | 2.498635 | 1.520569 | 2.284641 | 1.272848 | 2.5819   | 0.651445 | 2.038644 |
| sp B7N6A6 NDK_ECOLU-DLLGATNPANALAGTLR  | 0.458584 | 1.0137   | 0.798291 | 2.970453 | 1.041209 | 1.13165  | 0.809822 | 2.553321 | 0.9788   | 1.0137   | 0.963974 | 0.649419 |
| sp A7ZTU4 ATPB_ECO24-TVNMELIR          | 0.25192  | 1.048208 | 2.014229 | 0.196514 | 0.25192  | 0.859994 | 2.644136 | 0.152219 | 0.25192  | 1.014221 | 1.971785 | 0.152219 |
| sp P0AC39 ASPA_ECOL6-TQLQDAVPMTLGQEFR  | 0.719291 | 2.5733   | 0.938329 | 2.990594 | 0.656361 | 1.9754   | 1.064796 | 2.680714 | 0.590587 | 1.9651   | 0.907993 | 2.366612 |
| sp P00509 AAT_ECOLI-GLEEDA EGLR        | 0.222249 | 1.310854 | 0.976645 | 0.519102 | 0.244134 | 0.746041 | 1.190394 | 0.635814 | 0.240599 | 0.4555   | 1.068628 | 1.071534 |
| sp A1A7K0 GSA_ECOK1-ELIPGGVNSPVR       | 0.564969 | 1.2732   | 0.883765 | 1.219705 | 1.200381 | 1.099    | 0.650987 | 0.938654 | 1.217912 | 1.1858   | 0.765931 | 0.89219  |
| sp B5Z0E9 EFTS_ECO5E-FEVGEGIEK         | 0.155776 | 0.884565 | 1.225778 | 1.581923 | 0.627992 | 0.5712   | 0.719482 | 0.794192 | 0.575211 | 1.40085  | 0.744179 | 0.577918 |
| sp B7LFH2 RPIA_ECO55-GADVALIGTPDGVK    | 0.23327  | 1.35915  | 1.101606 | 0.462582 | 0.23327  | 1.35915  | 0.845198 | 0.687645 | 0.867575 | 1.0129   | 0.690265 | 0.718095 |
| sp A1AGI5 RL17_ECOK1-NMAGSLVR          | 2.272188 | 1.091116 | 0.485245 | 0.498965 | 2.272188 | 0.954253 | 0.52146  | 0.647666 | 2.272188 | 1.565428 | 1.055387 | 0.647666 |
| sp B7M6B0 TOLB_ECO8A-ITWEGSQNDADVSSDGK | 0.215373 | 0.450333 | 0.207892 | 1.262293 | 1.806553 | 1.2058   | 0.421758 | 1.030156 | 1.672169 | 1.5065   | 0.42113  | 0.991851 |
| sp B7NF50 ATPA_ECOLU-VGGAAQTK          | 3.613011 | 0.736778 | 0.136073 | 1.211977 | 4.644688 | 0.8306   | 3.051769 | 0.560312 | 5.685574 | 0.8306   | 0.883293 | 0.880495 |
| sp A7ZV73 RS18_ECO24-DIATLK            | 0.38655  | 3.3566   | 1.498879 | 0.179332 | 0.254337 | 0.841    | 1.498879 | 0.745549 | 0.150561 | 0.72845  | 2.017322 | 0.732844 |

|                                         |          |          |          |          |          |          |          |          |          |          |          |          |
|-----------------------------------------|----------|----------|----------|----------|----------|----------|----------|----------|----------|----------|----------|----------|
| sp A7ZV73 RS18_ECO24-NYITESGK           | 1.237259 | 0.64305  | 1.620609 | 1.020897 | 0.943193 | 0.8042   | 1.56949  | 0.924344 | 0.85317  | 0.8042   | 1.200344 | 0.889921 |
| sp P63285 CLPB_ECO57-QYSELEEEWK         | 2.091546 | 1.7231   | 0.516526 | 1.947749 | 6.637093 | 1.0087   | 2.119997 | 1.218416 | 1.733952 | 1.3659   | 1.257998 | 4.323409 |
| sp B5Z2K8 RL9_ECO5E-RAELEAK             | 0.650741 | 0.62995  | 0.333333 | 5.385774 | 1.706705 | 0.9815   | 0.978361 | 1.359257 | 1.285479 | 0.9815   | 0.888687 | 1.139993 |
| sp P0A6G1 CH10_ECO57-ILENGEVKPLDVK      | 15.99821 | 0.2861   | 1.047508 | 1.278661 | 9.280315 | 0.2861   | 0.896184 | 1.099386 | 2.505365 | 0.36185  | 1.159348 | 0.94971  |
| sp P17169 GLMS_ECOLI-HPDTLLAAR          | 0.076765 | 2.450261 | 1.026319 | 0.557839 | 0.076765 | 2.714407 | 1.576334 | 0.555662 | 0.076765 | 2.628473 | 1.914474 | 0.896995 |
| sp P0A6G1 CH10_ECO57-EVETK              | 0.361675 | 0.3606   | 1.391335 | 0.298256 | 0.336486 | 0.2314   | 0.830763 | 6.613671 | 0.724976 | 0.3555   | 1.019627 | 0.417036 |
| sp P0AG32 RHO_ECO57-VLDLASPIGR          | 0.571051 | 1.065019 | 0.842403 | 0.521248 | 0.16437  | 0.9188   | 0.372246 | 0.521248 | 0.593233 | 0.70075  | 2.165772 | 0.996919 |
| sp P0AFF8 NUSA_ECO57-VQAVSTELGGER       | 1.771323 | 1.0941   | 0.577863 | 0.675444 | 1.778402 | 1.0941   | 0.524905 | 0.649234 | 1.213194 | 1.69315  | 0.431703 | 0.734603 |
| sp P0AFG5 ODO1_ECO57-ISTVPEAVEMQSR      | 1.14687  | 1.8886   | 1.667867 | 0.447    | 0.499942 | 2.7002   | 2.335496 | 0.47942  | 0.401592 | 3.0851   | 1.217529 | 0.541661 |
| sp A7ZV12 CH60_ECO24-FENMGAQMVK         | 1.841082 | 3.713    | 0.497005 | 0.759933 | 1.229874 | 1.1553   | 0.519894 | 1.288977 | 1.458292 | 1.1553   | 0.402558 | 1.005251 |
| sp P23843 OPPA_ECOLI-VTDEAQR            | 2.127174 | 0.2577   | 0.428214 | 1.324403 | 2.127174 | 0.2577   | 0.246206 | 0.971047 | 2.127174 | 0.2577   | 0.320554 | 0.971047 |
| sp P0ABH7 CISY_ECOLI-LMGFGHR            | 1.492604 | 1.313084 | 1.249283 | 0.13306  | 1.45237  | 1.182435 | 1.594866 | 0.144717 | 1.45237  | 1.110536 | 1.196337 | 0.129794 |
| sp P08839 PT1_ECOLI-EENPFLGWR           | 4.64371  | 1.5627   | 0.381445 | 0.702743 | 0.636139 | 1.05115  | 0.651466 | 0.440267 | 1.156693 | 1.5627   | 0.651466 | 0.263256 |
| sp P39325 YTFQ_ECOLI-QENQIK             | 0.154867 | 1.951942 | 1.211614 | 0.395123 | 0.376833 | 1.3055   | 1.211614 | 0.098574 | 0.752076 | 1.1983   | 1.204585 | 0.209496 |
| sp B7MLA1 PYRG_ECO45-DVDSIYK            | 1.569146 | 0.3061   | 0.562486 | 0.883068 | 1.856596 | 1.52295  | 0.591736 | 0.768225 | 2.171903 | 1.82145  | 0.455042 | 0.504444 |
| sp P0ACF1 DBHA_ECOL6-IAAANVPFVSGK       | 0.932812 | 0.7984   | 0.543237 | 0.529961 | 1.076267 | 0.8052   | 0.784834 | 0.449767 | 0.941133 | 0.8052   | 0.778116 | 0.407211 |
| sp P08200 IDH_ECOLI-EEMGVK              | 0.352857 | 1.045157 | 8.269457 | 0.475987 | 0.57491  | 0.930098 | 4.779863 | 1.989025 | 0.266469 | 1.0102   | 2.41413  | 1.989025 |
| sp A7ZV12 CH60_ECO24-AIAQVGTISANSDETVGK | 1.289141 | 0.5583   | 0.415783 | 0.687165 | 1.241079 | 0.81355  | 0.675655 | 0.651071 | 1.207149 | 0.8448   | 0.675655 | 0.601428 |
| sp B7MIU7 RS16_ECO45-IAHWVGQGATISDR     | 1.105578 | 1.297124 | 4.768467 | 0.198546 | 1.773914 | 1.78455  | 1.368443 | 0.487133 | 1.150768 | 1.78455  | 1.368443 | 0.715473 |

|                                        |          |          |          |          |          |          |          |          |          |          |          |          |
|----------------------------------------|----------|----------|----------|----------|----------|----------|----------|----------|----------|----------|----------|----------|
| sp A7ZTU4 ATPB_ECO24-IMNVLGEPVDMK      | 0.751144 | 0.8093   | 1.062708 | 0.67954  | 0.777121 | 0.76735  | 1.120572 | 0.682591 | 0.747853 | 0.8032   | 1.041916 | 0.749028 |
| sp P36683 ACNB_ECOLI-LWVAPPTR          | 0.91037  | 1.4369   | 1.056206 | 0.653587 | 0.653241 | 1.3084   | 0.592062 | 0.619421 | 2.443652 | 1.1799   | 0.550691 | 0.649694 |
| sp P0A9C6 GLN1B_ECOL6-GGYFPPVPVDSAQDIR | 1.638711 | 0.95415  | 1.102551 | 0.607454 | 1.256917 | 0.5185   | 1.524658 | 1.346619 | 1.256917 | 0.6938   | 1.167294 | 1.506323 |
| sp B7LA23 GLPK_ECO55-ADISSDQIAAIGITNQR | 1.20556  | 1.05525  | 1.059199 | 0.603472 | 0.787028 | 1.02065  | 0.930042 | 0.575658 | 0.830554 | 0.9122   | 0.940104 | 0.62292  |
| sp A7ZSD0 MDH_ECO24-AGGGSATLSMGQAAAR   | 0.944071 | 0.49855  | 0.912577 | 0.5532   | 0.46057  | 0.446    | 1.095852 | 0.668464 | 0.778259 | 0.446    | 0.995384 | 0.516211 |
| sp A1AGK0 RS17_ECOK1-SIVVAIER          | 1.888211 | 1.050115 | 1.4461   | 3.11555  | 2.358709 | 0.849476 | 1.182717 | 1.279281 | 0.500168 | 1.308828 | 1.481047 | 1.167955 |
| sp B1LPI9 G6PI_ECOSM-DVTIADLFAK        | 1.32179  | 0.7381   | 0.702197 | 0.686788 | 1.412608 | 0.7381   | 0.898095 | 0.669994 | 1.374406 | 0.6522   | 0.481637 | 0.594532 |
| sp P0AC70 GLRX4_ECOL6-FAYVDILQNPDIR    | 0.950203 | 1.2464   | 1.333731 | 0.623712 | 0.781807 | 1.2464   | 1.257839 | 0.623712 | 0.764436 | 1.147    | 1.05623  | 0.466186 |
| sp P0AC34 FUMA_ECOL6-EILAQLSQYPVSTR    | 1.307263 | 0.56915  | 0.874862 | 3.132106 | 0.677903 | 0.7484   | 1.160208 | 2.319693 | 1.02365  | 0.6848   | 1.265928 | 2.430565 |
| sp B7UJP9 YAJQ_ECO27-GGDLGQPFQFK       | 1.738275 | 0.3622   | 0.809123 | 0.175805 | 0.871717 | 0.3622   | 0.809123 | 0.671043 | 1.026159 | 0.3622   | 0.81502  | 0.684666 |
| sp Q1R626 RL18_ECOUT-SGFQYHGR          | 1.053074 | 4.219137 | 0.372965 | 0.586202 | 1.193168 | 4.402535 | 0.239641 | 0.586202 | 1.079136 | 4.9448   | 0.33492  | 0.586202 |
| sp A7ZTP0 IBPB_ECO24-IAISERPALNS       | 4.314497 | 1.6493   | 0.827273 | 4.288419 | 6.216653 | 1.3046   | 1.014384 | 6.653376 | 3.896434 | 1.3046   | 0.969037 | 0.789982 |
| sp P09394 GLPQ_ECOLI-NIGIYPEIK         | 0.418733 | 1.50715  | 0.876502 | 0.392459 | 0.511129 | 1.0356   | 0.961162 | 0.712621 | 0.500553 | 1.207    | 1.168107 | 1.103008 |
| sp A1A7M9 ACCA_ECOK1-GQSEAIAR          | 2.409553 | 0.4453   | 0.635909 | 1.135192 | 0.387055 | 0.4453   | 0.381699 | 1.475631 | 0.777684 | 0.4453   | 0.381699 | 1.475631 |
| sp P0A6Z5 HTPG_ECO57-SEITDEEYK         | 2.228815 | 2.2531   | 1.238349 | 0.846399 | 2.168357 | 2.1465   | 2.155895 | 0.414784 | 1.484632 | 2.1465   | 1.704878 | 0.553799 |
| sp P0ACK0 CRP_ECO57-QPDAMTHPDGMQIK     | 0.555043 | 0.6081   | 0.213214 | 0.457355 | 0.161931 | 0.6081   | 1.044734 | 0.457355 | 0.555043 | 1.66305  | 0.32265  | 0.418755 |
| sp A8A4Y4 IF2_ECOHS-LAAEEQAQR          | 1.149497 | 0.4073   | 2.736875 | 2.42099  | 0.959328 | 0.5338   | 1.304932 | 1.607566 | 0.959328 | 0.5483   | 1.304932 | 1.607566 |
| sp P0AG68 RS1_ECOL6-DVVLVLDAGLK        | 0.892333 | 0.20055  | 3.883583 | 1.712863 | 0.722589 | 0.20055  | 6.800627 | 0.402813 | 0.722589 | 0.2169   | 5.934002 | 0.427131 |
| sp P0AG32 RHO_ECO57-GTGNMELHLSR        | 0.382454 | 0.888829 | 0.557143 | 0.88573  | 0.657978 | 0.836495 | 0.557143 | 0.834569 | 0.657978 | 0.602162 | 0.557143 | 0.84244  |

|                                         |          |          |          |          |          |          |          |          |          |         |          |          |
|-----------------------------------------|----------|----------|----------|----------|----------|----------|----------|----------|----------|---------|----------|----------|
| sp B5Z2K8 RL9_ECO5E-NIEFFEAR            | 1.336016 | 1.870927 | 1.317626 | 0.641011 | 0.843732 | 2.49195  | 1.474094 | 0.460228 | 1.270425 | 1.9385  | 0.778894 | 0.460228 |
| sp P0A6Z5 HTPG_ECO57-ELISNASDAADK       | 5.419843 | 2.5506   | 1.440776 | 0.759656 | 4.380128 | 2.7367   | 1.550278 | 0.922371 | 2.932183 | 1.9825  | 0.85958  | 1.166038 |
| sp P0AGF0 SUCD_ECOL6-DSILEAIDAGIK       | 0.928623 | 0.8232   | 0.088136 | 0.237334 | 0.745108 | 1.64385  | 0.648922 | 0.32655  | 1.043481 | 1.4766  | 0.606471 | 0.331745 |
| sp P0A8N6 SYK2_ECO57-TLAQEVLTGTTK       | 0.929236 | 1.01405  | 2.90282  | 2.455426 | 2.122313 | 1.01405  | 4.24354  | 2.493624 | 0.844852 | 0.9867  | 0.775604 | 1.784618 |
| sp P33602 NUOG_ECOLI-ELVGEENFYTGIAHGQER | 4.279355 | 1.8334   | 1.024436 | 0.26238  | 2.46191  | 1.8334   | 1.671504 | 0.26238  | 1.650059 | 1.3349  | 1.539801 | 0.310287 |
| sp P0ADZ7 YAJC_ECOLI-DFVAAVLPK          | 1.789497 | 1.9546   | 2.261002 | 0.173228 | 1.657598 | 1.9546   | 2.099496 | 0.761671 | 1.657598 | 1.9546  | 2.043956 | 0.761671 |
| sp P0A969 CSPD_ECOL6-GNHASVIVPVEVEAAVA  | 1.04399  | 2.505396 | 0.23528  | 0.870421 | 0.498481 | 2.5019   | 0.458464 | 0.239165 | 0.576691 | 2.5019  | 0.93074  | 0.41356  |
| sp P0A9B3 G3P_ECOL6-GANFDK              | 0.968129 | 0.7389   | 1.301815 | 0.415135 | 1.02379  | 1.68265  | 5.329296 | 0.570578 | 0.978503 | 1.68265 | 2.813799 | 0.669009 |
| sp P0AE52 BCP_ECOLI-FSLPDQDGEQVNLDFQGQR | 2.775883 | 1.163    | 0.967294 | 0.541797 | 3.290637 | 1.1847   | 1.0857   | 0.395764 | 3.290637 | 1.1847  | 1.0857   | 0.374652 |
| sp A1AIG0 RPOC_ECOK1-AMMDNLQTETVINR     | 0.809219 | 1.259162 | 0.903322 | 0.591623 | 0.597781 | 1.230006 | 0.479356 | 0.730312 | 0.565057 | 1.1157  | 0.598742 | 0.825423 |
| sp Q0TCG3 RS13_ECOL5-FVVEGDLR           | 0.858717 | 2.4608   | 2.175225 | 1.092439 | 1.064903 | 2.2148   | 1.049602 | 1.251045 | 1.227459 | 1.6531  | 0.646672 | 1.222209 |
| sp B7NF50 ATPA_ECOLU-GLLGR              | 0.87808  | 1.301069 | 1.589545 | 4.573416 | 1.141099 | 1.31005  | 2.487171 | 4.573416 | 1.090612 | 1.31005 | 1.903888 | 3.027573 |
| sp B1X8H5 SYGB_ECODH-EPVDAFFDK          | 2.554824 | 0.5629   | 1.271207 | 1.835072 | 2.448932 | 0.1362   | 1.363501 | 1.146671 | 2.448932 | 0.1362  | 1.3955   | 1.577417 |
| sp B5Z0E9 EFTS_ECO5E-IGVLVAAK           | 0.814153 | 1.789221 | 2.664777 | 1.96659  | 1.159279 | 2.1415   | 14.28953 | 1.580486 | 0.946847 | 2.1415  | 7.573715 | 1.747383 |
| sp A8A5E7 EFG_ECOHS-AGDIAAAIGLK         | 1.034239 | 0.9255   | 2.276909 | 4.250834 | 0.432126 | 0.6451   | 0.739785 | 1.437222 | 0.388889 | 0.6451  | 0.702103 | 1.993834 |
| sp B7LE54 FABA_ECO55-VGLFQDTSAF         | 1.341559 | 1.57145  | 0.794826 | 0.13958  | 1.299034 | 1.57145  | 0.972689 | 0.12357  | 1.341559 | 1.2893  | 1.188939 | 0.152654 |
| sp B7LA23 GLPK_ECO55-GAIFGLTR           | 3.586591 | 0.8639   | 1.197469 | 0.720728 | 3.653043 | 1.22685  | 1.197469 | 0.586992 | 2.324546 | 1.1405  | 0.94134  | 1.104896 |
| sp Q19NJ4 CH602_ECOK1-AVAAGMNPMDLK      | 0.29263  | 3.6123   | 0.935553 | 0.440228 | 0.999683 | 1.1744   | 0.832934 | 0.465903 | 0.943574 | 1.1601  | 1.206288 | 0.451938 |
| sp B7MGS0 DPS_ECO45-DDDTADILTAASR       | 1.34549  | 2.3497   | 0.743188 | 1.057015 | 1.35656  | 1.461    | 0.884624 | 0.573072 | 1.434318 | 1.743   | 0.508139 | 0.624506 |

|                                           |          |          |          |          |          |          |          |          |          |          |          |          |
|-------------------------------------------|----------|----------|----------|----------|----------|----------|----------|----------|----------|----------|----------|----------|
| sp P0A6Y9 DNAK_ECOL6-DVSIMPFK             | 1.8295   | 0.6142   | 1.317781 | 2.911319 | 1.14172  | 0.8435   | 1.217465 | 0.850237 | 0.948243 | 0.7709   | 1.338635 | 0.744751 |
| sp K0BE10 TAL_ECO1E-MIGDLL                | 8.527132 | 0.1586   | 0.109952 | 1.538974 | 5.493671 | 1.9046   | 0.201937 | 0.960969 | 0.94186  | 1.1362   | 1.420372 | 1.176948 |
| sp A7ZTP1 IBPA_ECO24-SAIGFDR              | 3.639271 | 1.324916 | 0.139129 | 2.225359 | 3.312681 | 1.368261 | 0.257287 | 2.108268 | 6.410466 | 1.076615 | 1.706931 | 2.003318 |
| sp A1AIG0 RPOC_ECOK1-IALASPMIR            | 2.558969 | 1.403395 | 0.557168 | 1.866905 | 2.703836 | 1.4193   | 0.392232 | 1.866905 | 2.167107 | 1.6956   | 0.976899 | 0.680722 |
| sp P36683 ACNB_ECOLI-LPTPEEYQTYVAQVDK     | 1.373861 | 1.25645  | 1.201839 | 0.399026 | 1.430736 | 1.2858   | 1.157236 | 0.25897  | 1.456364 | 1.2895   | 1.163744 | 0.374232 |
| sp P46855 YHHZ_ECOLI-DLANLR               | 0.764887 | 0.5915   | 1.424333 | 5.056658 | 0.538822 | 0.5915   | 1.411833 | 7.022546 | 0.129428 | 0.5915   | 0.50483  | 17.59038 |
| sp P0AC34 FUMA_ECOL6-YYDELPTEGNEHGQAFR    | 0.818912 | 1.271885 | 0.721572 | 1.176135 | 0.309252 | 1.303517 | 1.233903 | 1.099944 | 0.497031 | 1.6485   | 1.128116 | 0.776395 |
| sp B11VF1 ZAPB_ECOLC-LQALLGR              | 0.665745 | 0.5081   | 1.704097 | 3.325041 | 0.957325 | 0.93325  | 1.704097 | 3.359267 | 0.794627 | 0.8411   | 1.754334 | 1.650714 |
| sp P06720 AGAL_ECOLI-DLNIDPATLR           | 1.007749 | 1.1932   | 1.040371 | 0.621592 | 0.953344 | 1.0945   | 1.20155  | 0.544974 | 0.994708 | 1.1056   | 1.272025 | 0.590039 |
| sp P39325 YTFQ_ECOLI-DAEIPVFLDR           | 0.538107 | 1.0268   | 0.6569   | 0.213196 | 1.139982 | 1.0268   | 0.472686 | 0.412383 | 1.139982 | 1.0268   | 0.472686 | 0.327496 |
| sp A8A750 KATG_ECOHS-HPEALAK              | 6.62427  | 0.47725  | 1.69159  | 0.776281 | 3.298857 | 0.47725  | 1.181157 | 0.71134  | 2.553373 | 0.47725  | 1.678833 | 0.567611 |
| sp P00968 CARB_ECOLI-VSLDDPEALTK          | 0.364245 | 2.0339   | 1.562935 | 1.645863 | 0.51604  | 1.25465  | 2.055497 | 2.464881 | 0.666936 | 1.263    | 1.222123 | 1.593038 |
| sp A7ZV12 CH60_ECO24-VGAATEVEMK           | 1.34381  | 0.6974   | 0.32982  | 1.199171 | 1.046453 | 0.6711   | 0.935802 | 1.914269 | 1.165175 | 0.6974   | 0.914323 | 1.523629 |
| sp P0AB72 ALF_ECO57-AFQELNAIDVL           | 1.877693 | 0.6836   | 1.664496 | 0.241909 | 1.815045 | 0.7309   | 1.337704 | 0.21827  | 1.102918 | 0.6836   | 1.337704 | 0.157622 |
| sp A7ZHB5 SYI_ECO24-EYAATQVDGQR           | 1.552057 | 0.6445   | 0.806745 | 0.363701 | 1.354595 | 0.45905  | 1.068268 | 0.464618 | 1.354595 | 1.0127   | 1.099695 | 0.508399 |
| sp P15288 PEPD_ECOLI-NNDTVHDFTK           | 1.473896 | 0.679    | 2.373484 | 3.91561  | 0.523677 | 0.67985  | 4.735165 | 5.267306 | 0.50811  | 0.67985  | 1.798918 | 3.518913 |
| sp B7LF91 GCST_ECO55-YLLANDVAK            | 1.455315 | 1.14355  | 2.026652 | 0.775594 | 1.565417 | 1.44065  | 1.547942 | 1.438147 | 1.305706 | 1.4628   | 0.849223 | 0.733825 |
| sp P27302 TKT1_ECOLI-AGTHDSHGAPLGDAEIALTR | 0.82792  | 1.5589   | 6.003419 | 1.082962 | 1.052118 | 1.7693   | 1.945708 | 1.079304 | 1.316573 | 1.6323   | 1.572224 | 1.032498 |
| sp P09546 PUTA_ECOLI-NTWTLLPR             | 1.590346 | 1.3175   | 1.033633 | 1.448332 | 1.481549 | 1.3175   | 1.033633 | 1.64028  | 1.839809 | 1.3175   | 1.033633 | 1.376233 |

|                                       |          |          |          |          |          |          |          |          |          |         |          |          |
|---------------------------------------|----------|----------|----------|----------|----------|----------|----------|----------|----------|---------|----------|----------|
| sp K0BE10 TAL_ECO1E-ELAESEGAIER       | 0.400672 | 2.9746   | 0.497777 | 1.925187 | 0.533229 | 2.9746   | 0.407442 | 1.925187 | 0.441188 | 3.0323  | 0.718243 | 1.797408 |
| sp A7ZSL4 EFTU1_ECO24-VGEEVEIVGIK     | 0.815761 | 0.7832   | 0.809402 | 0.163352 | 0.86561  | 0.6865   | 0.86194  | 0.173406 | 0.961176 | 1.0701  | 0.882481 | 0.203474 |
| sp B1IQV7 PNP_ECOLC-VAALAEAR          | 1.589161 | 0.497068 | 0.579368 | 1.796299 | 1.914741 | 0.55975  | 0.682547 | 2.323225 | 2.292617 | 0.55975 | 0.727397 | 1.838073 |
| sp A7ZST1 PCKA_ECO24-EDGTIDFDDGSK     | 2.731105 | 0.3902   | 1.262041 | 0.791783 | 2.932341 | 0.728    | 1.279964 | 0.72786  | 3.512004 | 0.44545 | 1.166492 | 0.679078 |
| sp B7UJ60 RS15_ECO27-IVSEFGR          | 0.780717 | 1.47925  | 0.94442  | 3.318922 | 0.998779 | 1.47925  | 1.261733 | 3.341998 | 2.043194 | 1.4675  | 1.417477 | 1.739062 |
| sp P0AEU7 SKP_ECOLI-METDLQAK          | 0.143568 | 1.258084 | 0.864264 | 0.251129 | 1.02841  | 0.976466 | 1.303439 | 0.326995 | 0.385641 | 1.17965 | 0.744828 | 0.522953 |
| sp A1A7M1 BAMA_ECOK1-ALFATGNFEDVR     | 1.224782 | 0.871327 | 0.874964 | 0.643501 | 0.814343 | 0.3357   | 0.814579 | 0.938683 | 1.154574 | 0.3357  | 0.814579 | 0.945962 |
| sp Q19NJ4 CH602_ECOK1-VGAATEVEMK      | 1.34381  | 0.6974   | 0.32982  | 1.199171 | 1.046453 | 0.6711   | 0.935802 | 1.914269 | 1.165175 | 0.6974  | 0.914323 | 1.523629 |
| sp P0A9B3 G3P_ECOL6-FDGTVEVK          | 1.638942 | 0.5198   | 1.363803 | 0.949735 | 1.316778 | 0.8648   | 0.999426 | 0.584052 | 1.274548 | 0.96845 | 0.99346  | 0.475142 |
| sp B7N1C2 RS7_ECO81-LANELSDAAENK      | 0.147428 | 1.6318   | 1.294711 | 0.212292 | 0.306624 | 1.6318   | 0.597189 | 0.567649 | 0.160178 | 1.33885 | 3.476744 | 0.717309 |
| sp P36683 ACNB_ECOLI-VPPGVDEAAYVK     | 1.196301 | 0.8986   | 4.166134 | 1.2973   | 0.995046 | 1.02155  | 0.794505 | 0.435527 | 1.988782 | 1.1165  | 0.948529 | 0.685941 |
| sp P25553 ALDA_ECOLI-ASEISALIVEEGGK   | 0.693373 | 0.5631   | 0.346647 | 0.7395   | 1.097524 | 0.48165  | 0.515045 | 1.128627 | 1.083386 | 0.5356  | 0.560905 | 0.734915 |
| sp A7ZS83 RL21_ECO24-MYAVFQSGGK       | 2.13742  | 0.6563   | 0.602589 | 4.335127 | 0.554092 | 0.82035  | 1.59573  | 0.985361 | 0.554092 | 0.82035 | 1.56311  | 0.904438 |
| sp B7MIX0 RL1_ECO45-GVYIK             | 0.616988 | 0.547278 | 5.183466 | 0.971189 | 0.301998 | 0.49585  | 2.26501  | 0.921679 | 0.199408 | 0.5245  | 1.016381 | 0.964291 |
| sp P63285 CLPB_ECO57-AIDLIDEAASSIR    | 0.720195 | 0.6382   | 0.576604 | 0.325573 | 0.696469 | 0.42485  | 1.257577 | 0.324609 | 0.696469 | 0.5126  | 0.928268 | 0.279672 |
| sp P0AFG9 ODP1_ECO57-LETIEGSK         | 0.338988 | 0.5521   | 4.85806  | 1.021317 | 0.283035 | 0.8815   | 2.499044 | 2.813131 | 0.999492 | 0.8815  | 2.502375 | 1.403638 |
| sp P09373 PFLB_ECOLI-GDVLNYDEVMER     | 0.83528  | 1.7069   | 0.745426 | 1.022701 | 0.83528  | 1.7069   | 0.69234  | 1.022701 | 1.232944 | 1.7069  | 0.968618 | 0.916671 |
| sp A7ZNR4 GATZ_ECO24-EFVFTIADK        | 1.191194 | 1.5358   | 0.979764 | 0.329633 | 0.849059 | 1.40475  | 0.692634 | 0.351972 | 0.807832 | 1.47545 | 0.686984 | 0.477177 |
| sp P0A7W3 RS5_ECO57-NMINVALNNGTLQHPVK | 1.165064 | 1.64085  | 1.696106 | 0.63744  | 1.086837 | 0.89275  | 0.44437  | 0.646773 | 0.8317   | 0.89275 | 0.608613 | 0.566714 |

|                                                    |          |          |          |          |          |          |          |          |          |          |          |          |
|----------------------------------------------------|----------|----------|----------|----------|----------|----------|----------|----------|----------|----------|----------|----------|
| sp P0AFG5 ODO1_ECO57-LDEPSSNK                      | 1.988783 | 1.071    | 1.792022 | 0.522549 | 1.889097 | 1.02815  | 2.416366 | 0.514672 | 1.783133 | 1.054    | 1.247979 | 0.408426 |
| sp P0A6Y9 DNAK_ECOL6-<br>LMEIAQQQHAQQQTAGADASANNAK | 1.523783 | 0.9653   | 1.108164 | 0.386559 | 1.4378   | 0.9653   | 1.11218  | 0.596183 | 1.538507 | 0.9653   | 1.203182 | 0.725902 |
| sp P36683 ACNB_ECOLI-LAPIAAK                       | 0.714146 | 1.539303 | 1.209489 | 0.534355 | 0.78589  | 0.8376   | 1.57489  | 0.590276 | 0.503834 | 0.5531   | 0.554672 | 0.726183 |
| sp P0AEU7 SKP_ECOLI-AQAFEQDR                       | 1.528265 | 0.1648   | 0.907784 | 0.864219 | 1.497769 | 0.2326   | 1.167683 | 1.048427 | 1.805776 | 0.1648   | 1.078278 | 2.783315 |
| sp P36683 ACNB_ECOLI-MLEEYR                        | 1.655573 | 1.004531 | 4.452005 | 1.07716  | 1.520365 | 0.89805  | 4.005461 | 2.936787 | 1.215747 | 0.89805  | 3.15444  | 2.771443 |
| sp P0ABC8 HFLK_ECO57-ENEQQYIR                      | 1.791292 | 1.8915   | 1.254764 | 2.090605 | 1.763706 | 1.8915   | 1.578085 | 2.567198 | 1.729579 | 1.3278   | 1.805984 | 1.247753 |
| sp P21513 RNE_ECOLI-QAQQQTAETR                     | 0.632532 | 2.222271 | 0.957837 | 0.582263 | 0.692536 | 2.146294 | 1.022924 | 1.31236  | 0.692536 | 1.784316 | 1.022924 | 1.304975 |
| sp B1LNK7 GLYA_ECOSM-GGLILAK                       | 6.969996 | 1.15885  | 0.349887 | 0.341187 | 7.975636 | 1.15885  | 0.451088 | 0.341187 | 7.975636 | 1.15885  | 0.653221 | 0.365964 |
| sp P0AFG9 ODP1_ECO57-LTQEQLDNFR                    | 0.604743 | 4.80025  | 0.483344 | 1.837533 | 2.171535 | 1.1949   | 0.500655 | 0.813866 | 0.934145 | 1.1949   | 0.500655 | 0.813866 |
| sp A7ZTU4 ATPB_ECO24-VALTGLTMAEK                   | 0.074024 | 0.904711 | 1.407717 | 1.678582 | 0.081916 | 0.9453   | 0.855277 | 0.887329 | 0.350282 | 1.2552   | 0.855277 | 2.122321 |
| sp A7ZST1 PCKA_ECO24-LFIDNFDK                      | 1.342965 | 0.3707   | 1.769411 | 0.613713 | 0.91165  | 0.519    | 1.356017 | 0.493331 | 0.808786 | 0.9738   | 1.769411 | 0.602957 |
| sp P0A9B0 FUR_ECOL6-VLNQFDDAGIVTR                  | 2.807214 | 0.4832   | 2.14584  | 1.340101 | 2.807214 | 0.4832   | 1.788814 | 0.276819 | 2.807214 | 0.4832   | 2.942502 | 0.651172 |
| sp A7ZPS1 PUR7_ECO24-QAELYR                        | 1.788174 | 0.873314 | 0.848417 | 8.238445 | 3.438891 | 1.2354   | 1.886461 | 8.238445 | 3.438891 | 1.2354   | 1.886461 | 8.238445 |
| sp P27302 TKT1_ECOLI-GGYVLK                        | 0.184569 | 1.325198 | 1.014407 | 0.758552 | 0.212315 | 1.664751 | 0.774407 | 0.657937 | 0.310674 | 2.2671   | 0.774407 | 0.501938 |
| sp P0AF51 YJBR_ECO57-LLVQL                         | 0.199985 | 1.199182 | 1.560327 | 0.612958 | 0.7219   | 1.2114   | 1.462797 | 0.263105 | 0.727436 | 0.7915   | 1.468567 | 0.295162 |
| sp P09373 PFLB_ECOLI-SGVLTGLPDAYGR                 | 0.186745 | 0.4709   | 0.351059 | 0.422365 | 0.284652 | 0.4709   | 0.399175 | 0.427773 | 0.952575 | 0.4709   | 0.42008  | 0.325499 |
| sp A8A4Y7 ASSY_ECOHS-GDSVFPDDR                     | 0.501863 | 1.08181  | 0.53795  | 2.227897 | 0.429874 | 0.70225  | 0.391121 | 2.627604 | 0.429874 | 0.70225  | 0.665799 | 2.158658 |
| sp A8A6H0 TNAE_ECOHS-QLPCPAELLR                    | 1.930109 | 0.7174   | 0.680644 | 0.313162 | 1.366658 | 0.73725  | 1.101938 | 0.28292  | 1.519688 | 0.77945  | 0.898041 | 0.289721 |

|                                        |          |          |          |          |          |          |          |          |          |         |          |          |
|----------------------------------------|----------|----------|----------|----------|----------|----------|----------|----------|----------|---------|----------|----------|
| sp P0A863 TPX_ECOL6-DLSDVTLGQFAGK      | 1.943873 | 0.90145  | 0.551991 | 0.599274 | 2.229434 | 0.90145  | 0.541828 | 0.74186  | 0.933062 | 0.90145 | 0.531665 | 0.989408 |
| sp P0AFG5 ODO1_ECO57-EVVLGMAHR         | 1.288046 | 0.782442 | 1.241781 | 3.658458 | 0.987139 | 0.5706   | 0.701324 | 1.561586 | 0.987139 | 0.5706  | 0.759677 | 0.486773 |
| sp P02925 RBSB_ECOLI-ILLINPTSDAVGNAVK  | 0.411118 | 3.23     | 0.458922 | 0.517113 | 0.411118 | 3.46695  | 0.291195 | 1.543225 | 1.016185 | 3.23    | 0.514443 | 1.077818 |
| sp P00490 PHSM_ECOLI-EASGTGNMK         | 0.790066 | 1.2495   | 2.056932 | 1.678195 | 0.631346 | 1.2495   | 1.788409 | 1.559962 | 0.508223 | 0.5773  | 2.192501 | 1.504605 |
| sp P0A9Y7 CSPC_ECOL6-TLAEQNVFEIQDGQK   | 2.186387 | 1.032    | 1.441807 | 0.255346 | 2.39376  | 1.4348   | 1.303873 | 0.188637 | 2.256582 | 1.6026  | 1.048269 | 0.205643 |
| sp P0A8N6 SYK2_ECO57-VFEINR            | 1.124711 | 1.068613 | 1.083106 | 0.056681 | 2.255014 | 0.5551   | 0.755737 | 0.795929 | 1.817165 | 0.5569  | 0.98864  | 0.59488  |
| sp A7ZSL4 EFTU1_ECO24-GITINTSHVEYDTPTR | 0.509802 | 0.8557   | 1.508098 | 1.740501 | 1.345404 | 0.8557   | 1.508098 | 2.182643 | 1.687879 | 0.8557  | 0.89545  | 1.823529 |
| sp P0A6Y9 DNAK_ECOL6-SLGQFNLDGINPAPR   | 1.130863 | 1.0465   | 1.117901 | 2.095439 | 1.17622  | 1.0865   | 0.718585 | 0.973674 | 0.982357 | 1.1194  | 0.746848 | 0.957402 |
| sp P00490 PHSM_ECOLI-YGLNSAAEMTPR      | 2.547726 | 0.5741   | 0.734728 | 0.415068 | 2.547726 | 0.50945  | 0.734728 | 0.509926 | 3.643297 | 0.50945 | 1.011816 | 0.373331 |
| sp B7LA23 GLPK_ECO55-YIVALDQGTSSR      | 0.504028 | 0.554    | 2.370899 | 0.8885   | 0.692793 | 0.5562   | 1.237237 | 0.414113 | 0.66576  | 0.50015 | 1.258758 | 0.415808 |
| sp P36683 ACNB_ECOLI-EALGLPHSDVFR      | 3.379164 | 0.1559   | 0.205497 | 4.075137 | 3.379164 | 0.27665  | 0.145347 | 1.073315 | 3.379164 | 0.27665 | 0.145347 | 3.018527 |
| sp P63285 CLPB_ECO57-AAGATTANITQAIEQMR | 0.362766 | 0.612732 | 0.784597 | 1.211639 | 0.362766 | 0.697379 | 0.317172 | 1.211639 | 0.395494 | 0.8861  | 0.39665  | 1.258777 |
| sp B5Z0E9 EFTS_ECO5E-IGENINIR          | 1.097877 | 0.6051   | 1.503923 | 0.661675 | 0.840541 | 0.6201   | 2.342598 | 0.848423 | 1.381556 | 0.6201  | 1.167176 | 0.341328 |
| sp A1AF92 GCSP_ECOK1-LTDILAAAGLQK      | 1.081435 | 2.68735  | 0.552772 | 0.443681 | 1.121427 | 2.8474   | 0.552772 | 0.323724 | 1.22665  | 2.8474  | 0.427785 | 0.386723 |
| sp B7UK34 RL14_ECO27-YAGVGDIIK         | 2.014729 | 0.718534 | 0.980785 | 13.6474  | 1.654641 | 1.10145  | 0.980785 | 1.831112 | 1.635934 | 1.10145 | 1.372598 | 1.831112 |
| sp C4ZPU9 RS20_ECOBW-AFNEMQPIVDR       | 0.813849 | 1.2434   | 3.323035 | 2.597572 | 0.89109  | 1.4225   | 1.355698 | 1.524455 | 0.978565 | 1.7774  | 1.449193 | 1.407145 |
| sp P0AG32 RHO_ECO57-VFPAIDYNR          | 0.77497  | 0.620685 | 1.502286 | 0.462929 | 0.732063 | 0.5153   | 2.266776 | 0.220921 | 0.415238 | 0.4151  | 0.480407 | 0.234122 |
| sp P06959 ODP2_ECOLI-QEAAPAAAPAPAAGVK  | 0.764889 | 0.809    | 3.152429 | 0.347691 | 0.950701 | 0.809    | 6.245199 | 0.229493 | 1.015422 | 0.6711  | 0.84089  | 0.366357 |
| sp P63285 CLPB_ECO57-GELHCVGATTLDEYR   | 0.971494 | 0.596    | 0.846569 | 3.333709 | 0.58135  | 0.7893   | 0.658026 | 2.647881 | 0.870445 | 0.596   | 0.711312 | 4.66759  |



|                                          |          |          |          |          |          |         |          |          |          |         |          |          |
|------------------------------------------|----------|----------|----------|----------|----------|---------|----------|----------|----------|---------|----------|----------|
| sp P0A6Z5 HTPG_ECO57-TLTISDNGVGMTR       | 1.124047 | 0.9147   | 0.409303 | 0.908574 | 1.005117 | 1.2316  | 0.324832 | 2.825606 | 0.950933 | 1.2316  | 0.324832 | 1.208594 |
| sp P63285 CLPB_ECO57-DEEIR               | 1.166605 | 0.7092   | 0.863589 | 1.727899 | 1.06364  | 0.7092  | 1.139004 | 1.758718 | 0.77234  | 0.92025 | 1.332339 | 1.758718 |
| sp B7MDM6 HSLO_ECO45-VQGEIPENADLK        | 1.390643 | 1.1416   | 0.246365 | 1.672174 | 1.137558 | 0.9281  | 1.096221 | 1.05285  | 1.100011 | 0.94915 | 1.189372 | 0.921224 |
| sp P33602 NUOG_ECOLI-QYQNAEDTR           | 2.437814 | 3.7308   | 0.70726  | 2.536138 | 5.750545 | 3.7308  | 0.635098 | 1.672162 | 2.406134 | 3.7308  | 0.635098 | 1.567495 |
| sp A8A6H0 TNAA_ECOHS-AMYSIAK             | 0.580772 | 1.4556   | 0.114122 | 0.432913 | 0.879894 | 0.9822  | 0.114122 | 0.372297 | 0.623418 | 0.857   | 0.176424 | 0.370699 |
| sp P08200 IDH_ECOLI-SLNVALR              | 2.589297 | 0.388912 | 1.60326  | 0.358014 | 1.210903 | 0.6995  | 1.336141 | 2.242916 | 0.829168 | 0.6995  | 0.601724 | 1.563939 |
| sp P0AFG9 ODP1_ECO57-VLGTDFGR            | 0.370664 | 1.4755   | 0.825667 | 0.923942 | 1.016308 | 1.5885  | 0.528981 | 0.640684 | 0.640238 | 1.5885  | 0.988227 | 0.543232 |
| sp A8A5E7 EFG_ECOHS-GGVIPGEYIPAVDK       | 0.988571 | 0.61535  | 1.561134 | 2.207643 | 1.204691 | 0.7863  | 1.085573 | 1.277421 | 1.15751  | 0.7863  | 1.10086  | 1.269853 |
| sp A1AGK1 RL16_ECOK1-GNVEYVVALIQPGK      | 1.465416 | 1.13215  | 1.309304 | 0.527941 | 1.989614 | 1.7709  | 1.716538 | 0.428692 | 2.032143 | 2.33715 | 1.716538 | 0.432109 |
| sp A7ZIN4 KAD_ECO24-GTQAQFIMEK           | 1.015868 | 1.323925 | 0.35206  | 2.129518 | 1.513152 | 0.998   | 0.596412 | 2.248793 | 1.630791 | 1.3513  | 0.44276  | 1.417743 |
| sp P58578 GSHB_ECO57-EGDPNLGVIAETLTHEGTR | 1.909573 | 0.6391   | 1.227776 | 0.740735 | 1.131525 | 0.7384  | 0.808822 | 1.051194 | 1.083217 | 0.6391  | 0.641875 | 1.408352 |
| sp P06959 ODP2_ECOLI-EAAPAAAPAAAAAK      | 3.429589 | 0.744913 | 0.444084 | 0.546563 | 3.429589 | 0.73115 | 0.452592 | 0.472031 | 1.40784  | 0.7492  | 0.492994 | 0.968216 |
| sp P0AFG9 ODP1_ECO57-VVADAIK             | 1.211541 | 0.2117   | 0.540748 | 1.900702 | 0.866011 | 0.3385  | 1.403921 | 1.551446 | 1.255137 | 0.5752  | 1.933647 | 1.312693 |
| sp P36683 ACNB_ECOLI-QIEALQK             | 0.283831 | 0.752814 | 4.945932 | 3.309541 | 0.962072 | 0.6908  | 1.041258 | 0.251853 | 1.623279 | 0.5263  | 1.039918 | 0.251853 |
| sp P0AC41 SDHA_ECOLI-AAGLHLQESIAEQGALR   | 1.444007 | 0.5641   | 0.80024  | 1.687773 | 2.389124 | 0.5641  | 0.31198  | 1.677229 | 2.389124 | 0.5641  | 0.31198  | 1.677229 |
| sp B7MLA1 PYRG_ECO45-LIDSQDVETR          | 0.267859 | 0.435233 | 0.760162 | 1.294001 | 0.245998 | 0.3006  | 0.344764 | 0.79908  | 0.167444 | 0.3006  | 0.456275 | 1.128632 |
| sp B7NF50 ATPA_ECOLU-ASTISNVVR           | 0.853265 | 1.5587   | 0.222811 | 3.630696 | 0.901647 | 0.8662  | 0.75213  | 2.819858 | 1.058378 | 0.8662  | 0.75213  | 2.819858 |
| sp P0AC41 SDHA_ECOLI-VTGQALTVNEK         | 2.11361  | 0.8166   | 0.559776 | 1.200018 | 2.172968 | 0.8166  | 0.804941 | 0.987538 | 1.559042 | 1.01535 | 0.978896 | 1.53389  |
| sp A7ZS83 RL21_ECO24-QWFTDVK             | 0.977821 | 1.2973   | 1.420786 | 0.413841 | 0.800874 | 0.944   | 0.723785 | 0.730699 | 1.998206 | 1.0053  | 0.723785 | 0.725381 |

|                                     |          |          |          |          |          |         |          |          |          |         |          |          |
|-------------------------------------|----------|----------|----------|----------|----------|---------|----------|----------|----------|---------|----------|----------|
| sp P0AFG9 ODP1_ECO57-FPNDVDPIETR    | 1.409374 | 2.793127 | 1.174363 | 1.066797 | 1.004465 | 3.801   | 1.440609 | 0.957404 | 0.923248 | 3.4509  | 1.322263 | 1.15557  |
| sp B7LA23 GLPK_ECO55-GVNANHIIR      | 1.767278 | 0.773583 | 4.317153 | 2.007449 | 0.501992 | 0.7282  | 3.025228 | 2.481166 | 0.457912 | 0.7282  | 3.025228 | 2.525883 |
| sp P0AG61 RS14_ECO57-EAAMR          | 9.757576 | 0.58655  | 1.45049  | 1.783137 | 10.35592 | 0.58655 | 0.923633 | 1.703206 | 6.565609 | 0.58655 | 0.50571  | 1.598958 |
| sp A7ZST1 PCKA_ECO24-EAEPEIYNAIR    | 0.882138 | 0.5969   | 0.658825 | 1.451733 | 1.02035  | 0.5969  | 1.08792  | 0.939799 | 1.431658 | 1.7791  | 1.001692 | 1.359585 |
| sp P0A9X5 MREB_ECOL6-GMVLTTGGGALLR  | 7.108497 | 2.3944   | 0.342328 | 1.436287 | 6.488557 | 2.3944  | 0.302238 | 1.153028 | 1.887936 | 1.954   | 0.375835 | 1.153028 |
| sp P0A6Z5 HTPG_ECO57-GIEVLLLSDR     | 2.055056 | 2.2057   | 1.848017 | 1.883246 | 2.669676 | 0.9073  | 1.564537 | 2.201695 | 2.669676 | 0.9073  | 1.564537 | 2.031078 |
| sp B7UIL4 RS2_ECO27-TVPMFNEALAELENK | 1.020301 | 1.3643   | 0.689165 | 0.892817 | 0.982538 | 1.76665 | 0.485793 | 0.300377 | 0.877072 | 1.8717  | 0.560629 | 0.348503 |
| sp B1IX65 SYE_ECOLC-SASAFNTDK       | 0.18089  | 2.2027   | 1.48321  | 0.855584 | 0.551301 | 1.57005 | 0.951499 | 1.500688 | 1.378059 | 2.6244  | 2.634323 | 1.243897 |
| sp A7ZUK1 RPOB_ECO24-GGVVQYVDASR    | 12.50681 | 0.6211   | 0.814003 | 0.351729 | 10.52689 | 0.6211  | 0.814003 | 0.351729 | 10.52689 | 0.6211  | 0.371297 | 0.533765 |
| sp P63285 CLPB_ECO57-TDINQALNR      | 1.515705 | 1.83455  | 0.450738 | 0.498661 | 1.515705 | 1.83455 | 0.450738 | 0.498661 | 1.515705 | 1.83455 | 0.450738 | 0.498661 |
| sp P0AFH9 OSMY_ECOL6-GYAGDTATTSEIK  | 1.719193 | 0.9071   | 0.67028  | 1.139509 | 2.057231 | 0.9071  | 0.719307 | 1.818081 | 2.186876 | 1.0211  | 0.964909 | 1.64961  |
| sp P0AC34 FUMA_ECOL6-DPEASENDK      | 3.987841 | 1.5474   | 1.197111 | 0.355474 | 3.255834 | 0.2164  | 0.953268 | 0.407068 | 4.545782 | 0.4134  | 0.953268 | 0.473002 |
| sp P62593 BLAT_ECOLX-SALPAGWFIADK   | 0.9076   | 0.768    | 0.937514 | 0.732396 | 1.186356 | 0.76625 | 0.742377 | 0.69552  | 1.137849 | 0.768   | 0.737287 | 0.534231 |
| sp P0A9S3 GATD_ECOLI-GSFESFAQAVR    | 1.376353 | 0.7772   | 1.352763 | 0.466021 | 1.421776 | 0.8667  | 1.323151 | 0.529609 | 1.332259 | 0.9562  | 1.448825 | 1.274422 |
| sp B7MLA1 PYRG_ECO45-GLDAILVPGGFGYR | 0.985076 | 0.86585  | 1.1159   | 0.103044 | 1.441614 | 1.1089  | 1.320425 | 0.164358 | 1.557194 | 1.2099  | 1.866053 | 0.134515 |
| sp A7ZPA8 YFBU_ECO24-MMTMLDPANAER   | 2.455005 | 0.3583   | 0.96098  | 1.681971 | 0.821984 | 0.69485 | 0.842777 | 1.71681  | 1.124265 | 1.0314  | 0.990773 | 1.982187 |
| sp P63285 CLPB_ECO57-IAIEQAR        | 1.876809 | 0.3248   | 0.636739 | 0.929738 | 1.361707 | 0.3248  | 0.451032 | 0.602012 | 0.942796 | 0.3248  | 0.405915 | 0.403778 |
| sp P08200 IDH_ECOLI-YYQGTPSPVK      | 4.50747  | 0.7486   | 7.422673 | 0.659945 | 1.094043 | 0.7486  | 6.765766 | 2.275898 | 1.430389 | 0.5844  | 2.232904 | 0.850414 |
| sp P23869 PPIB_ECOLI-SGMHQDVPK      | 1.240917 | 0.533293 | 1.414606 | 1.790786 | 1.851587 | 0.3124  | 0.978928 | 1.753844 | 1.851587 | 0.3124  | 0.927406 | 1.753844 |

|                                          |          |          |          |          |          |         |          |          |          |         |          |          |
|------------------------------------------|----------|----------|----------|----------|----------|---------|----------|----------|----------|---------|----------|----------|
| sp B1IQV7 PNP_ECOLC-EATEQSQPAAAEAPAAEQGE | 1.524237 | 1.597    | 0.659498 | 2.531682 | 1.817163 | 1.6654  | 0.545879 | 3.147698 | 2.011422 | 2.5089  | 0.71225  | 3.102547 |
| sp B1IUUY2 SYA_ECOLC-VGDAVQADVDEAR       | 1.664854 | 4.5365   | 1.341169 | 2.908505 | 2.362413 | 2.7615  | 1.094001 | 3.988513 | 2.089259 | 2.7615  | 1.136088 | 1.581007 |
| sp A7ZSD0 MDH_ECO24-FGLSLVR              | 1.40176  | 1.21985  | 1.593107 | 1.844282 | 3.071367 | 1.5017  | 5.277362 | 1.024209 | 0.85929  | 1.59885 | 4.435069 | 1.827955 |
| sp P0AG32 RHO_ECO57-GLIVAPPK             | 1.951061 | 3.5044   | 0.450199 | 1.583019 | 1.892252 | 2.54125 | 0.886419 | 1.247568 | 1.832844 | 2.2424  | 0.996942 | 0.829568 |
| sp P63285 CLPB_ECO57-VTDAEIAEVLAR        | 0.247631 | 1.2334   | 0.447928 | 0.882977 | 0.387594 | 1.41675 | 0.375201 | 0.803732 | 0.53471  | 1.5561  | 1.114551 | 0.822898 |
| sp B1LL63 ATPF_ECOSM-EIADGLASAER         | 0.587762 | 0.97605  | 0.583565 | 0.80668  | 2.094929 | 0.97605 | 0.59505  | 0.757245 | 2.094929 | 0.97605 | 0.755156 | 0.757245 |
| sp P36683 ACNB_ECOLI-DLVHAIPLYAIK        | 1.230996 | 0.3531   | 0.976741 | 0.373269 | 1.174283 | 0.513   | 0.762089 | 0.274552 | 1.020901 | 0.4802  | 1.449886 | 0.340977 |
| sp A8A6H0 TNAE_ECOHS-AVEIGSFLGR          | 1.661344 | 1.211    | 1.390713 | 0.07706  | 1.328201 | 0.74385 | 1.591403 | 0.082798 | 1.157985 | 0.8145  | 1.332133 | 0.077691 |
| sp P0ABH7 CISY_ECOLI-GVFTFDPGFTSTASCESK  | 1.460287 | 0.8144   | 0.518398 | 1.052994 | 1.675477 | 0.8949  | 0.612938 | 0.810769 | 1.52283  | 0.99135 | 0.642194 | 0.909583 |
| sp B1XB97 HSLU_ECODH-DLTDAAVK            | 1.145861 | 2.542    | 0.757223 | 0.412523 | 0.645046 | 1.6178  | 0.71963  | 0.513934 | 1.341283 | 1.6178  | 0.597296 | 0.236335 |
| sp P0A6F2 CARA_ECO57-SLFDGTLQGIHR        | 4.801584 | 1.508224 | 0.938304 | 3.509754 | 2.747853 | 1.6163  | 1.163492 | 4.453899 | 3.931684 | 3.0917  | 1.344345 | 4.199833 |
| sp A7ZTP0 IBPB_ECO24-NFDLSPLMR           | 0.529701 | 1.02995  | 1.154382 | 1.146583 | 0.542212 | 1.02915 | 1.052127 | 1.119226 | 0.646475 | 1.02915 | 1.097538 | 0.960439 |
| sp B5YTN8 RL2_ECO5E-YILAPK               | 4.762839 | 1.13195  | 0.987514 | 0.439503 | 11.7851  | 0.6912  | 0.987514 | 0.328398 | 13.02295 | 0.2974  | 0.677609 | 0.877424 |
| sp A1AF92 GCSP_ECOK1-MMGAEGLK            | 4.030058 | 0.3067   | 1.180179 | 1.081623 | 4.35206  | 0.3067  | 1.206635 | 0.272092 | 3.438622 | 0.226   | 0.542614 | 4.665968 |
| sp A7ZPD1 ACCD_ECO24-LMNLPAPEAPR         | 3.82499  | 0.7799   | 0.063749 | 10.91964 | 1.724287 | 0.74085 | 0.117379 | 10.91964 | 2.124784 | 0.7799  | 0.117379 | 4.361931 |
| sp B5Z2K8 RL9_ECO5E-VANLGS LGDQVNVK      | 0.629752 | 0.8835   | 0.774394 | 0.360595 | 0.693812 | 1.08575 | 1.278143 | 0.625099 | 0.728815 | 1.2328  | 1.154327 | 0.486025 |
| sp P0AC41 SDHA_ECOLI-ATVLATGGAGR         | 0.303543 | 4.3157   | 2.927278 | 0.912089 | 0.287033 | 4.3157  | 2.666    | 0.976223 | 0.280029 | 4.3157  | 3.092228 | 0.937568 |
| sp P0A7W9 RS8_ECO57-AVVESIQR             | 0.47106  | 1.0717   | 0.90434  | 2.068526 | 2.115927 | 1.0717  | 0.520125 | 2.125957 | 2.115927 | 1.0717  | 0.520125 | 1.227381 |
| sp B1X9G2 OPGG_ECODH-GLAIDTALPSGEEFPR    | 2.336871 | 1.41245  | 0.979503 | 0.395641 | 0.918117 | 2.0798  | 1.062622 | 0.526149 | 2.447304 | 0.8129  | 0.906556 | 0.2945   |

|                                       |          |          |          |          |          |         |          |          |          |         |          |          |
|---------------------------------------|----------|----------|----------|----------|----------|---------|----------|----------|----------|---------|----------|----------|
| sp P0A9P2 DLDH_ECO57-AGVEVDDR         | 0.918575 | 0.579734 | 3.212094 | 2.268691 | 0.73931  | 0.52515 | 3.266768 | 1.710398 | 0.73931  | 0.4797  | 2.641463 | 2.75623  |
| sp A7ZJA8 SUCC_ECO24-DLALIEINPLVITK   | 1.438961 | 0.617958 | 0.358417 | 0.578045 | 0.755129 | 0.3907  | 0.984531 | 0.336014 | 0.740226 | 0.46485 | 1.466834 | 0.177241 |
| sp P0A6Z5 HTPG_ECO57-ALLGER           | 0.885564 | 0.621848 | 1.085533 | 0.859838 | 1.220691 | 0.60005 | 0.979814 | 1.735848 | 1.220691 | 0.60005 | 0.979814 | 1.986323 |
| sp B7MTW7 DADA_ECO81-GIVDIPVYPLK      | 2.058913 | 2.5676   | 1.078228 | 3.901885 | 0.953039 | 1.71235 | 0.662087 | 3.901885 | 1.360415 | 1.69685 | 0.662087 | 2.770803 |
| sp P0A6Z5 HTPG_ECO57-AADETEDEAK       | 1.643361 | 0.6604   | 1.928916 | 0.471998 | 1.587251 | 0.8276  | 1.86732  | 0.46684  | 1.675576 | 0.8276  | 1.919784 | 0.477876 |
| sp P23869 PPIB_ECOLI-NEANGLK          | 0.559846 | 2.45335  | 2.036636 | 4.513824 | 1.197629 | 1.18905 | 2.034104 | 2.270001 | 2.457277 | 1.18905 | 1.704859 | 0.654121 |
| sp P08200 IDH_ECOLI-AAIEYAIANDR       | 0.901924 | 0.79755  | 1.257744 | 0.472064 | 0.835565 | 0.6247  | 1.070169 | 2.184944 | 1.015262 | 0.79755 | 1.054452 | 2.184944 |
| sp B7NF50 ATPA_ECOLU-QSVDQPVTGYK      | 1.027097 | 1.6568   | 1.318471 | 0.789964 | 0.857529 | 0.48525 | 0.88613  | 1.187059 | 0.615385 | 0.5074  | 0.794948 | 1.575098 |
| sp B7MTW7 DADA_ECO81-TPAIPYEDLSVAR    | 0.866401 | 0.9611   | 0.51815  | 0.610177 | 1.352512 | 0.9945  | 0.821039 | 0.603588 | 1.003091 | 0.99    | 0.59895  | 0.749379 |
| sp A7ZSD0 MDH_ECO24-LFGVTTLDIIR       | 2.41872  | 0.8792   | 0.475263 | 0.601087 | 1.963868 | 0.9299  | 0.328939 | 0.58683  | 1.855655 | 1.23165 | 0.804694 | 0.313331 |
| sp P37330 MASZ_ECOLI-VAFINTGFLDR      | 5.018121 | 0.519    | 0.349874 | 0.201695 | 3.127245 | 1.7941  | 0.96241  | 0.382096 | 1.572672 | 1.1693  | 1.136085 | 0.382096 |
| sp P36683 ACNB_ECOLI-MTSVGSQDTTGPMTTR | 0.997306 | 2.3365   | 1.029882 | 0.771384 | 0.702495 | 1.50835 | 1.089894 | 1.529974 | 0.852334 | 0.8799  | 1.029246 | 0.818728 |
| sp P0AFG7 ODO2_ECO57-LLAEHNLDASAIK    | 0.202888 | 2.589    | 0.961972 | 0.492608 | 0.785786 | 1.015   | 0.868979 | 0.650453 | 0.716441 | 0.84215 | 0.830913 | 2.000191 |
| sp P0ABK6 CYSK_ECO57-NIVVILPSSGER     | 1.847171 | 1.8745   | 1.534366 | 0.60735  | 1.847171 | 1.3227  | 1.329026 | 0.663071 | 1.677104 | 1.0532  | 1.534366 | 0.718793 |
| sp B7MYP6 RL19_ECO81-QLEQEQMK         | 1.296063 | 1.35405  | 2.075581 | 1.020086 | 1.840846 | 1.438   | 1.006801 | 0.801948 | 1.840846 | 1.459   | 0.988005 | 1.367684 |
| sp P39325 YTFQ_ECOLI-LIGDWLVK         | 3.243104 | 0.6832   | 0.261689 | 0.15066  | 1.632162 | 0.848   | 1.38557  | 0.212083 | 1.632162 | 0.88815 | 3.746998 | 0.141742 |
| sp B7NER6 SECB_ECOLU-DWQPEVK          | 35.76896 | 1.6079   | 0.151621 | 1.759407 | 2.923568 | 1.0522  | 0.675071 | 1.721056 | 2.545381 | 1.3831  | 0.748144 | 0.365137 |
| sp A8A466 PGK_ECOHS-VATEFSETAPATLK    | 0.770529 | 1.6283   | 1.00972  | 0.781618 | 0.933028 | 1.0459  | 1.35026  | 0.452295 | 1.087995 | 1.0816  | 1.242333 | 0.705126 |
| sp B7L4J7 RL5_ECO55-MWEFFER           | 0.272289 | 0.2968   | 0.455575 | 0.287939 | 0.179183 | 3.16495 | 1.125452 | 0.277866 | 0.246493 | 1.5772  | 0.897714 | 0.26323  |

|                                      |          |          |          |          |          |          |          |          |          |         |          |          |
|--------------------------------------|----------|----------|----------|----------|----------|----------|----------|----------|----------|---------|----------|----------|
| sp A7ZTP1 IBPA_ECO24-KFQLAENIHVR     | 1.86157  | 1.08555  | 0.421409 | 0.863756 | 1.35929  | 1.08555  | 0.653377 | 0.509072 | 1.165229 | 0.8687  | 0.657387 | 0.780203 |
| sp B5Z0E9 EFTS_ECO5E-DAGFQAFADK      | 1.149035 | 1.2557   | 0.143913 | 5.161262 | 1.364124 | 0.5703   | 0.498108 | 1.463548 | 1.133169 | 1.1083  | 0.526624 | 1.786082 |
| sp A7ZPS1 PUR7_ECO24-LAEAGIPTQMER    | 0.614218 | 0.504275 | 0.88341  | 0.965391 | 0.778001 | 0.146    | 2.098078 | 0.145524 | 0.711307 | 0.146   | 1.536838 | 0.545295 |
| sp P25553 ALDA_ECOLI-GETVGQELAGNPK   | 2.057525 | 2.355    | 0.696298 | 0.69759  | 1.750822 | 2.4884   | 0.769929 | 0.600276 | 2.276811 | 2.355   | 0.690653 | 0.651274 |
| sp P0A435 PTKB_ECOL6-ILTILQG         | 0.365674 | 0.3024   | 0.753592 | 1.213017 | 0.415381 | 0.32145  | 0.762446 | 1.557249 | 0.415381 | 0.3024  | 0.753592 | 2.607244 |
| sp P0AEQ3 GLNH_ECOLI-SGLLMVK         | 1.736238 | 0.9229   | 5.875608 | 1.510525 | 1.736238 | 0.581    | 5.356627 | 1.825497 | 1.736238 | 0.58555 | 4.915361 | 0.66937  |
| sp B7LA23 GLPK_ECO55-SNTGLVIDPYFSGTK | 1.239882 | 0.41725  | 0.677031 | 0.422705 | 1.239882 | 0.4461   | 0.954428 | 0.54043  | 1.31089  | 0.4461  | 0.954428 | 0.586353 |
| sp A7ZV12 CH60_ECO24-EIELEDK         | 6.985686 | 1.19485  | 1.319935 | 3.505534 | 1.596892 | 2.0131   | 1.040258 | 2.000965 | 1.862164 | 1.9788  | 1.223679 | 0.728629 |
| sp A7ZTH0 TDH_ECO24-EMFETWYK         | 1.875947 | 3.25155  | 1.773974 | 0.248428 | 1.984564 | 3.25155  | 2.131893 | 0.228851 | 2.739646 | 2.08915 | 2.131893 | 0.554136 |
| sp B1X8H5 SYGB_ECODH-LQTVLFQQQLGTLR  | 4.158085 | 1.4632   | 0.216936 | 0.796586 | 4.158085 | 1.4632   | 0.216936 | 0.796586 | 2.556201 | 1.1932  | 0.379804 | 0.853714 |
| sp P0AE52 BCP_ECOLI-AGDIAPK          | 11.01121 | 0.3926   | 2.115701 | 1.049205 | 11.99604 | 0.8086   | 1.058352 | 0.991646 | 12.96381 | 0.8086  | 1.09908  | 0.941638 |
| sp P62593 BLAT_ECOLX-ILESFRPEER      | 1.020834 | 1.554323 | 1.935743 | 0.067507 | 1.014635 | 1.205138 | 1.777924 | 0.067507 | 0.678687 | 1.6744  | 1.609845 | 0.767176 |
| sp P0AE52 BCP_ECOLI-AGVDVLGISTDKPEK  | 0.242048 | 1.349561 | 2.234915 | 0.594214 | 0.270783 | 1.7219   | 2.184198 | 0.672903 | 0.632463 | 1.77625 | 0.934861 | 0.54668  |
| sp B7M107 RL30_ECO8A-EDTPAIR         | 3.419895 | 2.1026   | 0.802216 | 3.566987 | 2.333007 | 1.91415  | 0.825024 | 3.10293  | 1.525127 | 1.91415 | 0.794705 | 3.021826 |
| sp P0AGD5 SODF_ECO57-GTAFEGK         | 1.361916 | 0.27235  | 2.029773 | 1.883565 | 2.338462 | 0.2893   | 1.217224 | 1.623935 | 3.088451 | 0.56095 | 1.217224 | 1.508797 |
| sp A7ZTP1 IBPA_ECO24-UIPEAK          | 0.319213 | 0.7775   | 4.001493 | 1.461964 | 0.407656 | 0.7775   | 0.884138 | 0.775388 | 0.384303 | 0.7557  | 0.932275 | 1.076755 |
| sp A7ZJZ6 SERC_ECO24-GQFAAVPLNILGDK  | 0.537798 | 0.82035  | 0.63643  | 1.061186 | 0.618902 | 0.6571   | 0.755206 | 1.297355 | 0.720152 | 0.6481  | 0.918529 | 1.471732 |
| sp P0ABH7 CISY_ECOLI-MLEEISSVK       | 0.64444  | 0.725    | 0.04721  | 1.861629 | 0.756912 | 0.7023   | 0.107637 | 1.715244 | 0.717165 | 0.7023  | 0.392637 | 1.514563 |
| sp A1AIG0 RPOC_ECOK1-LLDLAAPDIHVR    | 0.716815 | 0.585861 | 1.858929 | 1.064616 | 0.241412 | 0.42     | 2.627731 | 0.926908 | 0.657121 | 0.42    | 1.833449 | 0.401505 |

|                                                   |          |          |          |          |          |          |          |          |          |         |          |          |
|---------------------------------------------------|----------|----------|----------|----------|----------|----------|----------|----------|----------|---------|----------|----------|
| sp A8A466 PGK_ECOHS-ADLNVPVK                      | 0.211093 | 1.1822   | 0.229315 | 0.286688 | 0.348752 | 1.1822   | 0.438591 | 0.639276 | 0.688518 | 0.8029  | 1.050467 | 0.679856 |
| sp P0A6Y9 DNAK_ECOL6-<br>HSQVFSTAEDNQSAVTIHVLQGER | 1.12326  | 1.0693   | 2.625117 | 1.488339 | 2.587556 | 1.0693   | 2.625117 | 2.135325 | 2.587556 | 0.86215 | 2.625117 | 1.737839 |
| sp B1IQV7 PNP_ECOLC-GDISEFAPR                     | 1.118204 | 0.923302 | 2.729468 | 0.736017 | 1.392409 | 0.82094  | 0.874028 | 0.747592 | 1.006951 | 0.5869  | 1.124046 | 0.649123 |
| sp P0ADU3 YGIN_ECO57-ILQPGI                       | 1.117494 | 1.307471 | 1.133066 | 1.244445 | 1.740015 | 2.0167   | 1.179732 | 0.950932 | 1.739785 | 1.11215 | 2.170893 | 0.646585 |
| sp A7ZSJ0 RL15_ECO24-VEGGVVDLNTLK                 | 0.052362 | 0.578821 | 1.287057 | 1.294167 | 0.784447 | 0.912    | 0.67861  | 0.708583 | 0.644825 | 0.912   | 0.657654 | 0.656872 |
| sp B7MLA1 PYRG_ECO45-QLYNAPTIVER                  | 0.108889 | 0.58285  | 0.820749 | 0.7094   | 0.108889 | 0.58285  | 0.820749 | 0.7094   | 0.497759 | 0.8907  | 0.692965 | 0.7094   |
| sp A1AGK1 RL16_ECOK1-VLYEMDGVPEELAR               | 1.014957 | 1.0175   | 0.990742 | 0.651709 | 1.064431 | 1.01305  | 0.990742 | 0.63266  | 0.944599 | 1.2455  | 1.026444 | 0.606167 |
| sp P36683 ACNB_ECOLI-AGFLAAIAK                    | 0.290554 | 0.291    | 1.895321 | 0.553377 | 0.227413 | 0.4422   | 2.515639 | 0.73074  | 0.217435 | 0.5934  | 1.005165 | 1.168823 |
| sp B7UIL4 RS2_ECO27-AGVHFGHQTR                    | 1.085126 | 0.556725 | 0.73603  | 1.157075 | 1.37078  | 0.539    | 1.030077 | 1.323619 | 1.37078  | 0.539   | 1.022481 | 1.340346 |
| sp P27302 TKT1_ECOLI-SGHPGAPMGADIAEVLWR           | 2.343027 | 1.16385  | 0.83246  | 0.162916 | 3.913463 | 1.78605  | 2.370208 | 0.375932 | 2.875946 | 1.60835 | 1.20562  | 0.261455 |
| sp B7M2A7 PROQ_ECO8A-IGIFQDLVDR                   | 1.822453 | 1.1784   | 1.285841 | 0.189209 | 0.895075 | 1.1784   | 1.681764 | 0.254196 | 0.895075 | 1.1784  | 2.85447  | 0.254196 |
| sp B1XAH2 HEM3_ECODH-ALVGAPDGSQHIR                | 0.726427 | 0.8622   | 0.267261 | 0.67108  | 1.20986  | 1.002    | 0.24477  | 0.473809 | 1.086606 | 1.1418  | 0.348653 | 0.489574 |
| sp B7UK21 RS11_ECO27-ALNAAGFR                     | 1.694004 | 0.2847   | 0.440648 | 0.913868 | 1.156058 | 1.23     | 1.204177 | 0.731702 | 1.543088 | 1.23    | 1.226351 | 1.749812 |
| sp A1AIA7 HSLV_ECOK1-ALLENTESAR                   | 0.701886 | 0.4077   | 2.349091 | 1.312909 | 0.370254 | 0.4077   | 1.488329 | 0.230007 | 0.545164 | 0.4077  | 0.846725 | 0.201924 |
| sp A7ZUK1 RPOB_ECO24-AYDLGADVR                    | 1.010762 | 1.6765   | 1.558519 | 1.330988 | 1.205807 | 1.6583   | 1.121974 | 0.72532  | 1.263624 | 1.33425 | 1.081614 | 0.510116 |
| sp A8A5E7 EFG_ECOHS-GQYGHVVIDMYPLEPGSNPK          | 1.264017 | 1.424872 | 0.297706 | 1.389567 | 1.131325 | 1.769599 | 0.500955 | 1.916153 | 1.151455 | 3.26885 | 0.223983 | 1.916153 |
| sp B5Z3U4 TIG_ECO5E-ELFEEQAK                      | 1.139051 | 1.0918   | 0.396999 | 2.73285  | 1.652811 | 1.3672   | 1.691207 | 1.304337 | 0.997618 | 1.5256  | 2.467427 | 1.060784 |
| sp P0AB72 ALF_ECO57-GEDQPNK                       | 1.875508 | 2.837    | 1.298542 | 0.978948 | 2.150048 | 2.69705  | 1.184804 | 0.86907  | 2.170988 | 2.837   | 1.160164 | 0.977499 |

|                                      |          |          |          |          |          |          |          |          |          |         |          |          |
|--------------------------------------|----------|----------|----------|----------|----------|----------|----------|----------|----------|---------|----------|----------|
| sp P0ADZ2 RL23_ECO57-APHVSEK         | 0.662449 | 1.013888 | 0.725082 | 0.126164 | 0.666186 | 1.28215  | 0.662912 | 0.248464 | 0.515621 | 1.28215 | 1.056511 | 0.27047  |
| sp P08200 IDH_ECOLI-EEFGGELIDGGPWLK  | 2.9559   | 3.0014   | 2.154517 | 0.225489 | 2.763461 | 3.0743   | 1.284929 | 0.486016 | 3.142265 | 3.1353  | 1.37869  | 0.679177 |
| sp A7ZTP0 IBPB_ECO24-NEPEPIAAQR      | 1.001151 | 0.7907   | 0.889255 | 0.658291 | 1.368608 | 0.7654   | 0.983319 | 1.664802 | 1.297047 | 0.7257  | 0.910807 | 0.922762 |
| sp P0A6Z5 HTPG_ECO57-VLQMLEK         | 0.865821 | 0.3232   | 0.550613 | 0.744264 | 1.242172 | 0.3232   | 0.550613 | 0.715937 | 2.625517 | 0.47165 | 0.804247 | 0.680248 |
| sp Q46834 YGHF_ECOLI-AMIALMR         | 3.364812 | 0.758747 | 0.760112 | 0.296527 | 1.852225 | 0.751845 | 0.721535 | 0.272463 | 1.980635 | 0.7984  | 0.721535 | 0.272463 |
| sp P0AG32 RHO_ECO57-VNEVNFDPENAR     | 3.533504 | 0.623555 | 0.306367 | 1.927202 | 1.208092 | 0.4977   | 0.878604 | 0.704051 | 1.213247 | 0.4196  | 0.767191 | 0.803897 |
| sp P0A7W0 RS4_ECO57-EKPTWLEVDAGK     | 8.468877 | 1.39225  | 1.287074 | 0.985969 | 3.484377 | 1.39225  | 1.443408 | 0.878806 | 2.187837 | 2.45865 | 1.178437 | 0.988072 |
| sp A1AF92 GCSP_ECOK1-EVAVFPAGVADK    | 1.915179 | 0.7721   | 0.529574 | 0.909699 | 1.192582 | 0.7721   | 0.49508  | 0.852572 | 1.119167 | 0.74575 | 0.563734 | 0.523608 |
| sp P0AEH6 ELAB_ECOL6-SSGDPADQK       | 4.117835 | 3.6716   | 1.488376 | 0.329692 | 4.198797 | 3.6716   | 1.477614 | 0.58585  | 5.180392 | 2.8597  | 1.423274 | 0.476392 |
| sp A7ZKD6 YCDX_ECO24-GMAPIAEFADL     | 1.755914 | 1.51705  | 1.104888 | 0.093966 | 1.865478 | 1.2869   | 1.055935 | 0.15297  | 1.738505 | 1.2915  | 1.106836 | 0.150063 |
| sp P69778 LPP_ECO57-IDQLSSDVQTLNAK   | 2.477561 | 1.27065  | 1.45159  | 0.330908 | 1.657005 | 0.9875   | 1.271476 | 0.281388 | 1.41471  | 0.9875  | 1.719644 | 0.327808 |
| sp A7ZV12 CH60_ECO24-FGNDAR          | 1.697506 | 0.3568   | 0.453146 | 0.961928 | 1.93307  | 0.3568   | 0.569318 | 1.484093 | 1.84392  | 0.3568  | 0.502209 | 0.262025 |
| sp A1AGC3 RS9_ECOK1-AGFVTR           | 0.277386 | 3.046508 | 0.437522 | 4.057294 | 0.934173 | 4.375474 | 0.965035 | 4.057294 | 1.402673 | 6.946   | 2.036422 | 1.68028  |
| sp B1X8H5 SYGB_ECODH-GEWLLYR         | 4.148953 | 2.2647   | 1.077421 | 1.626461 | 5.303615 | 1.5997   | 0.640825 | 1.626461 | 2.024462 | 1.5997  | 0.958479 | 1.626461 |
| sp P00968 CARB_ECOLI-TPASFEPSIDYVVTK | 2.28991  | 0.3468   | 1.301614 | 0.538387 | 1.892481 | 1.0571   | 1.462617 | 0.506807 | 1.728772 | 1.0571  | 0.996517 | 0.274553 |
| sp P0A6Y9 DNAK_ECOL6-DQGIDLR         | 0.942438 | 0.5737   | 1.36053  | 1.24641  | 0.451392 | 0.5508   | 0.922992 | 8.153209 | 0.589698 | 0.5737  | 1.316102 | 5.320423 |
| sp B7MYP6 RL19_ECO81-VWVVEGSK        | 0.562618 | 1.8615   | 1.878087 | 1.960912 | 0.536094 | 1.8615   | 1.372816 | 1.500822 | 0.665197 | 2.10205 | 1.081383 | 1.492542 |
| sp P0A6Y9 DNAK_ECOL6-LPADDK          | 0.568899 | 1.69585  | 0.258324 | 1.061319 | 2.760854 | 1.2558   | 0.714487 | 0.940216 | 2.013618 | 1.66705 | 0.814788 | 0.807785 |
| sp P0A9A7 FTSZ_ECOL6-NAADED          | 1.017501 | 3.246323 | 0.332353 | 0.79741  | 1.406438 | 3.4812   | 0.723075 | 0.827012 | 1.259985 | 3.03815 | 0.723075 | 1.745442 |

|                                         |          |         |          |          |          |         |          |          |          |         |          |          |
|-----------------------------------------|----------|---------|----------|----------|----------|---------|----------|----------|----------|---------|----------|----------|
| sp A8A4Y4 IF2_ECOHS-GDIVLCGFHEYGR       | 1.07277  | 1.1046  | 1.094135 | 1.867715 | 2.972537 | 1.1046  | 0.647805 | 2.999845 | 2.17819  | 0.6721  | 0.622252 | 1.256726 |
| sp P0AFF8 NUSA_ECO57-EITLEAAR           | 1.342133 | 5.0986  | 2.000671 | 0.555502 | 2.918015 | 5.0986  | 1.491122 | 0.871071 | 0.93459  | 3.72815 | 1.495875 | 1.685595 |
| sp A7ZTU4 ATPB_ECO24-DLEHPIEVPVGK       | 0.169936 | 0.33705 | 0.730628 | 2.173924 | 0.424255 | 0.33705 | 0.805882 | 2.104403 | 0.80376  | 0.3648  | 0.95912  | 1.050811 |
| sp P0A9P2 DLDH_ECO57-ALLHVAK            | 1.312032 | 1.2204  | 9.496209 | 0.373467 | 0.567939 | 0.7746  | 2.997532 | 0.386101 | 0.552104 | 0.59485 | 2.997532 | 0.711183 |
| sp P13035 GLPD_ECOLI-YLVDHEWVR          | 0.165698 | 2.1176  | 0.585712 | 8.646629 | 0.165698 | 0.8946  | 0.511698 | 3.625201 | 0.165698 | 0.8946  | 0.420149 | 3.65749  |
| sp P0AEQ3 GLNH_ECOLI-SGTGSVDYAK         | 9.919679 | 0.4217  | 0.976334 | 3.414855 | 1.507817 | 0.5934  | 0.818706 | 0.359247 | 1.330983 | 0.8831  | 0.650426 | 0.435774 |
| sp A7ZIN4 KAD_ECO24-IILGAPGAGK          | 0.288484 | 0.3647  | 1.756831 | 0.407747 | 0.543065 | 0.4444  | 1.36655  | 0.884956 | 0.648191 | 0.4476  | 1.01184  | 0.311891 |
| sp A8A5E7 EFG_ECOHS-AGPLAGYPVDMGIR      | 0.60905  | 0.75575 | 1.317099 | 0.283333 | 0.60905  | 0.75905 | 0.918884 | 1.304132 | 0.549047 | 0.5501  | 0.858454 | 1.043057 |
| sp A1AIG0 RPOC_ECOK1-VTAEDVLKPGTADILVPR | 0.596767 | 0.822   | 0.782131 | 0.997945 | 1.009077 | 0.4813  | 0.799936 | 1.191943 | 0.902659 | 0.4409  | 1.097563 | 1.077206 |
| sp P39325 YTFQ_ECOLI-STLYLPDTAK         | 1.321432 | 0.3189  | 2.981775 | 0.407961 | 0.809543 | 1.6398  | 1.157318 | 0.424887 | 0.633116 | 1.6398  | 1.477499 | 0.547501 |
| sp A7ZQP6 FUCI_ECO24-TYWSPEAIER         | 0.618905 | 1.64745 | 0.782613 | 0.678937 | 2.858133 | 1.3477  | 0.683009 | 0.476019 | 1.660849 | 1.3477  | 0.641139 | 1.003498 |
| sp A1A7M9 ACCA_ECOK1-NFGMPAPEGYR        | 1.245465 | 8.9616  | 0.467157 | 1.530612 | 0.94026  | 8.9616  | 0.51862  | 1.020734 | 1.339198 | 4.5324  | 1.326082 | 1.8803   |
| sp P25553 ALDA_ECOLI-AQPEWEALPAIER      | 1.09156  | 0.71555 | 3.355032 | 1.279447 | 1.2459   | 1.0096  | 3.355032 | 0.951479 | 1.392349 | 1.0096  | 3.156522 | 1.279447 |
| sp P0A8C6 YGFB_ECO57-VTGETGEAIDDLR      | 1.160988 | 1.9109  | 0.501418 | 1.747265 | 1.98684  | 1.9794  | 0.436986 | 0.830772 | 1.542347 | 1.9794  | 0.436986 | 1.739447 |
| sp P76558 MAO2_ECOLI-LTEFVYK            | 2.143877 | 1.255   | 1.731704 | 3.563873 | 10.84281 | 0.6809  | 2.201238 | 1.06564  | 1.027085 | 0.96795 | 2.236659 | 1.182807 |
| sp P36683 ACNB_ECOLI-GGGLCLGGK          | 3.965241 | 1.30665 | 0.149232 | 3.237958 | 0.66044  | 2.0408  | 0.564618 | 2.289152 | 0.477563 | 2.1176  | 0.626836 | 3.625907 |
| sp P0A6Y9 DNAK_ECOL6-IAGLEVK            | 0.327028 | 0.39585 | 0.78837  | 1.270197 | 0.416237 | 0.9073  | 1.036159 | 1.064876 | 0.67923  | 1.09385 | 1.490179 | 1.029377 |
| sp B7UIL4 RS2_ECO27-AASEAVK             | 1.895486 | 0.84845 | 1.81661  | 0.821895 | 1.200913 | 0.84845 | 2.105813 | 0.88244  | 1.286868 | 0.84845 | 1.755859 | 0.88244  |
| sp B7UK34 RL14_ECO27-MIQEQTMLNVADNSGAR  | 2.176285 | 0.57345 | 2.231725 | 0.949169 | 1.112799 | 0.7571  | 1.088845 | 1.195783 | 1.28354  | 0.7571  | 1.088845 | 0.87135  |



|                                        |          |          |          |          |          |          |          |          |          |          |          |          |
|----------------------------------------|----------|----------|----------|----------|----------|----------|----------|----------|----------|----------|----------|----------|
| sp P09546 PUTA_ECOLI-GVDMAMR           | 3.989285 | 1.49653  | 0.789033 | 4.571658 | 5.9709   | 0.865398 | 1.793611 | 4.641869 | 4.70659  | 0.796155 | 0.789033 | 2.248866 |
| sp B1IT06 RS6_ECOLC-LEDWGR             | 3.634837 | 1.274879 | 2.25567  | 2.603205 | 5.985505 | 1.3428   | 2.036307 | 1.140415 | 4.975011 | 1.3428   | 8.453106 | 1.140415 |
| sp P08839 PT1_ECOLI-NTNFEDAK           | 0.363686 | 1.8159   | 1.248092 | 1.043976 | 0.342104 | 2.47405  | 0.139791 | 0.102452 | 1.746928 | 2.0131   | 0.494596 | 0.474626 |
| sp P0A9P2 DLDH_ECO57-YDAVLVAIGR        | 0.555719 | 0.8862   | 3.693074 | 1.577619 | 0.645188 | 0.8854   | 2.091267 | 2.0688   | 0.542661 | 0.8846   | 0.779058 | 1.406516 |
| sp A7ZTH0 TDH_ECO24-NVVITDVNEYR        | 1.574725 | 0.8962   | 1.111768 | 0.2928   | 1.237586 | 0.4428   | 1.222349 | 0.168353 | 0.652502 | 0.5227   | 1.079616 | 0.222904 |
| sp B1IX65 SYE_ECOLC-ALDFIAER           | 2.706256 | 1.422618 | 0.322173 | 1.763413 | 1.783952 | 1.4225   | 0.480548 | 1.348187 | 2.516004 | 2.3796   | 0.480548 | 1.212868 |
| sp B6I586 SYH_ECOSE-NVLGSYGYSEIR       | 0.83205  | 0.3962   | 1.212029 | 0.174811 | 0.332166 | 0.705    | 2.265457 | 0.38967  | 0.962296 | 0.5406   | 1.783984 | 0.444481 |
| sp P63285 CLPB_ECO57-ESDEASK           | 5.824845 | 4.49835  | 1.84469  | 0.76956  | 7.71744  | 3.7415   | 1.008611 | 1.739099 | 8.308794 | 3.7415   | 1.204368 | 1.410045 |
| sp A1A7K0 GSA_ECOK1-IIGGGMPVGAFGGR     | 0.914536 | 0.937229 | 0.735733 | 0.416743 | 1.178633 | 0.4507   | 1.01723  | 0.177038 | 1.698925 | 0.5161   | 0.821927 | 0.471242 |
| sp A8A6H0 TNAA_ECOHS-DWTIEQITR         | 1.513855 | 2.73465  | 1.060112 | 1.027808 | 1.492592 | 2.38875  | 0.872968 | 1.456078 | 1.678058 | 1.8514   | 1.519762 | 1.373465 |
| sp B7MTW7 DADA_ECO81-AETNIQYEGR        | 2.230422 | 1.6777   | 0.804181 | 0.633906 | 2.182492 | 1.6777   | 0.804181 | 0.382832 | 0.299414 | 1.2145   | 0.556438 | 0.130339 |
| sp P00968 CARB_ECOLI-QPANATVTAIEMAVEK  | 2.570488 | 1.7412   | 1.028113 | 0.056836 | 1.429761 | 1.1039   | 1.210663 | 0.06856  | 3.687489 | 1.1039   | 1.691453 | 0.096192 |
| sp P0A6Z5 HTPG_ECO57-YIFELNPDHVLVK     | 1.851514 | 1.2997   | 0.531627 | 0.153582 | 4.840038 | 2.0399   | 0.945031 | 0.182543 | 2.483531 | 1.40345  | 0.610349 | 0.182543 |
| sp B7MLA1 PYRG_ECO45-SVIEALK           | 0.148075 | 1.034968 | 1.098176 | 1.039948 | 0.170004 | 0.976396 | 2.257597 | 1.177378 | 0.62354  | 1.140706 | 2.257597 | 0.816257 |
| sp C4ZZ44 ILVC_ECOBW-GFGVPTLIAVHPENDPK | 2.027945 | 1.03575  | 1.089563 | 1.143841 | 1.282837 | 0.9096   | 1.251941 | 0.597005 | 1.341676 | 0.9163   | 1.455046 | 0.658982 |
| sp B1LNK7 GLYA_ECOSM-SPFVTS GIR        | 4.246019 | 1.3693   | 0.863375 | 0.228936 | 3.120283 | 1.17755  | 0.863375 | 0.236691 | 2.782273 | 0.9858   | 0.762321 | 0.228936 |
| sp A7ZV12 CH60_ECO24-EMLPVLEAVAK       | 1.066749 | 1.4017   | 1.52727  | 0.257269 | 0.837546 | 1.8673   | 1.140292 | 0.362442 | 0.84268  | 1.40075  | 1.13686  | 0.33003  |
| sp A7ZS83 RL21_ECO24-ITGISA            | 0.060811 | 0.46365  | 0.708197 | 0.256593 | 0.153839 | 0.5449   | 1.073764 | 0.347945 | 0.153839 | 0.4704   | 0.718805 | 0.472919 |
| sp B5Z3U4 TIG_ECO5E-ELPELTAEFIK        | 1.034425 | 1.0583   | 1.396358 | 0.120101 | 1.217645 | 1.01635  | 1.237383 | 0.123697 | 1.226699 | 0.9765   | 1.059594 | 0.12146  |

|                                       |          |          |          |          |          |          |          |          |          |          |          |          |
|---------------------------------------|----------|----------|----------|----------|----------|----------|----------|----------|----------|----------|----------|----------|
| sp A7ZSD0 MDH_ECO24-NLVQQVAK          | 1.535545 | 0.5929   | 1.315781 | 0.812325 | 1.003937 | 0.5573   | 1.113603 | 1.186601 | 1.309181 | 0.6285   | 1.436726 | 0.963622 |
| sp P0AAI9 FABD_ECOLI-ITFNAPTVPVNNVDVK | 0.043653 | 2.8355   | 1.390024 | 0.124669 | 0.119701 | 3.8673   | 1.390024 | 0.086126 | 0.133557 | 3.8673   | 0.678605 | 0.113742 |
| sp P0A6Y9 DNAK_ECOL6-VAEFFGK          | 0.724329 | 0.95065  | 1.651428 | 0.170224 | 0.819531 | 0.8818   | 1.095317 | 0.463703 | 0.95203  | 1.6555   | 0.882408 | 0.42339  |
| sp P0A7W0 RS4_ECO57-GNTGENLLALLEGR    | 0.845133 | 1.39255  | 1.478646 | 0.33824  | 1.070803 | 1.5265   | 1.480062 | 1.395979 | 0.748842 | 1.4012   | 1.359906 | 1.408336 |
| sp A1A7K0 GSA_ECOK1-NAVIEAAER         | 0.827324 | 0.4514   | 0.344048 | 1.602873 | 0.839091 | 0.39045  | 0.235398 | 2.38456  | 0.937178 | 0.4514   | 0.235398 | 1.901427 |
| sp Q19NJ4 CH602_ECOK1-AMEAPLR         | 0.890598 | 1.178748 | 1.36816  | 1.514474 | 0.890598 | 1.342847 | 1.452059 | 1.43155  | 0.590703 | 1.7033   | 0.542708 | 1.863168 |
| sp P26648 FTSP_ECOLI-GSIGQLLVNPVP     | 0.763603 | 0.945645 | 9.383966 | 1.959376 | 0.508349 | 0.6923   | 9.383966 | 1.871176 | 0.547431 | 0.6923   | 8.097046 | 1.883522 |
| sp B1IQV7 PNP_ECOLC-DAQVLDELMGER      | 0.696183 | 1.588942 | 0.883787 | 0.438101 | 0.696183 | 1.470609 | 1.031487 | 0.508417 | 0.780085 | 1.368874 | 1.238266 | 0.331874 |
| sp B7M1N3 RL4_ECO8A-SILSELVR          | 5.326308 | 1.553861 | 0.841625 | 1.660344 | 2.833271 | 1.8812   | 0.823496 | 2.839624 | 2.833271 | 1.8812   | 0.800191 | 2.839624 |
| sp P0A9Y7 CSPC_ECOL6-GFGFITPADGSK     | 1.135313 | 0.6991   | 0.9535   | 0.302636 | 1.102707 | 0.6721   | 1.041861 | 0.420631 | 1.091683 | 0.71665  | 1.120014 | 0.396121 |
| sp P36683 ACNB_ECOLI-SPLLTPEK         | 1.800953 | 0.38895  | 1.250673 | 3.969913 | 1.285338 | 0.554    | 3.000254 | 0.814942 | 1.151956 | 0.4836   | 1.908386 | 1.412156 |
| sp P0A9Y0 CSPA_ECOL6-SLDEGQK          | 1.851492 | 0.3602   | 0.64242  | 0.437057 | 0.89988  | 1.38485  | 2.821216 | 0.382924 | 1.771409 | 1.7614   | 1.692928 | 0.51715  |
| sp B7UIL4 RS2_ECO27-DLETQSQDGTFDK     | 1.12636  | 0.3316   | 2.239557 | 3.56233  | 0.814953 | 0.3316   | 0.935727 | 2.678438 | 1.938146 | 0.67285  | 0.935727 | 1.124391 |
| sp P09394 GLPQ_ECOLI-DDNLVVLHDHYLDR   | 2.312451 | 1.465953 | 2.113946 | 6.616033 | 1.898763 | 0.8877   | 2.113946 | 8.785334 | 2.428479 | 0.8877   | 0.519141 | 3.002799 |
| sp A7ZUK1 RPOB_ECO24-LNHLVDDK         | 1.043779 | 1.49735  | 0.727843 | 0.788248 | 1.206191 | 1.1361   | 0.727843 | 0.484743 | 1.282258 | 1.1361   | 0.558729 | 0.953493 |
| sp P0AB53 YCHN_ECO57-EQESNLDLR        | 1.49617  | 1.4989   | 8.062332 | 0.667942 | 0.993282 | 1.4989   | 13.15202 | 1.349071 | 1.197727 | 1.4989   | 10.90804 | 0.999323 |
| sp A7ZSJ4 RL6_ECO24-YADEVVR           | 0.840736 | 0.771    | 2.150929 | 1.075057 | 1.352413 | 0.771    | 2.4254   | 1.39074  | 2.115373 | 0.771    | 3.20907  | 1.806918 |
| sp A7ZUJ6 RL11_ECO24-SMGLVVED         | 1.053781 | 1.124665 | 0.941111 | 1.384848 | 0.929669 | 1.2256   | 1.029687 | 2.600313 | 0.809802 | 1.2686   | 0.951625 | 1.707551 |
| sp B7M1N4 RL3_ECO8A-MIGLVGK           | 0.769093 | 0.5841   | 0.69281  | 0.32738  | 1.112878 | 0.5841   | 0.637547 | 0.20581  | 1.12537  | 0.5841   | 0.504831 | 0.18571  |

|                                        |          |          |          |          |          |          |          |          |          |          |          |          |
|----------------------------------------|----------|----------|----------|----------|----------|----------|----------|----------|----------|----------|----------|----------|
| sp A1AIG0 RPOC_ECOK1-FATSDLNDLYR       | 0.731611 | 1.2205   | 0.316    | 2.254762 | 1.75236  | 1.2205   | 0.241408 | 1.427447 | 1.75236  | 1.2205   | 0.241408 | 1.427447 |
| sp A8A750 KATG_ECOHS-ALPVLEK           | 1.086089 | 0.3655   | 0.696547 | 0.39931  | 1.01274  | 0.3655   | 0.619436 | 0.430641 | 1.076939 | 0.3655   | 0.320088 | 0.359636 |
| sp P0A7W0 RS4_ECO57-VVNIASYQVSPNDVVSIR | 2.720381 | 1.4529   | 0.717242 | 0.450517 | 1.638122 | 1.4484   | 1.162062 | 0.445712 | 1.638122 | 1.4484   | 1.162062 | 0.445712 |
| sp P0A6Y9 DNAK_ECOL6-ASSGLNEDEIQK      | 0.852569 | 1.933    | 0.758895 | 1.012357 | 1.313784 | 1.6149   | 0.913508 | 0.896373 | 1.752274 | 2.0001   | 0.94521  | 0.910503 |
| sp P36683 ACNB_ECOLI-ADGVIFQTAV        | 0.800819 | 1.323    | 1.211107 | 1.781247 | 0.939726 | 0.9992   | 1.149595 | 1.684136 | 0.91623  | 0.9542   | 1.088421 | 1.555257 |
| sp P00954 SYW_ECOLI-AVTDSDEPPVVR       | 2.559738 | 1.882    | 0.882353 | 1.005999 | 1.853692 | 1.9801   | 1.01874  | 0.996769 | 1.710031 | 1.882    | 0.976347 | 0.960918 |
| sp B5YQG1 FETP_ECO5E-EAEGQDFQLYPGELGK  | 0.890417 | 1.3902   | 0.943331 | 0.200057 | 0.68254  | 2.9018   | 1.613008 | 0.292769 | 0.745452 | 1.8056   | 2.250578 | 0.288154 |
| sp B7MIX0 RL1_ECO45-VAVFTQGANAEAAK     | 0.295126 | 1.9817   | 0.286475 | 2.274506 | 1.315789 | 1.8107   | 0.286998 | 1.464892 | 1.315789 | 1.8107   | 0.286998 | 2.030565 |
| sp B7N1C2 RS7_ECO81-ILPDPK             | 0.726584 | 0.3575   | 0.298473 | 0.628316 | 1.065734 | 0.3954   | 1.822596 | 0.44995  | 0.994465 | 0.6071   | 2.061913 | 1.038384 |
| sp P0AAI6 FABF_ECOL6-AEAQAVK           | 3.601412 | 3.0601   | 3.49051  | 1.272543 | 2.382259 | 1.2686   | 1.05198  | 0.598962 | 0.278818 | 1.1215   | 1.05198  | 0.829676 |
| sp A7ZV12 CH60_ECO24-ALSVPSCDSK        | 1.020169 | 0.7023   | 0.978077 | 0.765212 | 1.405766 | 0.7023   | 0.995254 | 0.646902 | 1.112819 | 0.7181   | 0.951359 | 0.562611 |
| sp P60624 RL24_ECOLI-SNSETIK           | 1.361251 | 1.099211 | 0.557814 | 0.948173 | 0.952335 | 0.72485  | 0.798572 | 1.036159 | 0.901434 | 0.72485  | 1.117566 | 0.729098 |
| sp A7ZS83 RL21_ECO24-IGVFPVDGGVIK      | 2.981202 | 1.2097   | 3.189668 | 0.521224 | 0.652412 | 0.45395  | 0.93266  | 0.251542 | 0.462884 | 1.0664   | 3.34954  | 0.414739 |
| sp A7ZJA8 SUCC_ECO24-QPDLR             | 2.884171 | 0.6405   | 0.122211 | 1.735635 | 0.170538 | 0.6405   | 0.096753 | 1.303481 | 0.193572 | 0.6405   | 0.150226 | 1.294721 |
| sp P37665 YIAD_ECOLI-ADSVASALITQGVDASR | 5.971648 | 1.09678  | 1.289785 | 1.439012 | 5.586424 | 1.082063 | 1.047707 | 1.135202 | 5.586424 | 1.294409 | 1.020119 | 1.035662 |
| sp P0AFG5 ODO1_ECO57-LSGEDSGR          | 2.821437 | 0.5828   | 0.746389 | 0.460886 | 2.821437 | 0.55585  | 0.556637 | 0.591784 | 2.821437 | 0.5828   | 0.742057 | 0.525761 |
| sp P08200 IDH_ECOLI-DSVTLVHK           | 0.593811 | 1.0718   | 0.731126 | 0.628032 | 0.741928 | 0.86115  | 0.700248 | 0.462719 | 0.760427 | 0.86115  | 1.293478 | 0.882275 |
| sp P23857 PSPE_ECOLI-VPEQYQEHVQAINIPLK | 0.303386 | 0.641621 | 0.727502 | 3.60842  | 1.436435 | 0.758117 | 1.022245 | 0.866693 | 1.079039 | 0.72355  | 0.833247 | 1.211226 |
| sp B7LD85 SYS_ECO55-GEDIEPLR           | 1.78522  | 1.63095  | 1.865609 | 0.727836 | 1.482692 | 1.6165   | 1.061496 | 0.575387 | 1.925049 | 1.81575  | 1.479266 | 1.467654 |

|                                        |          |          |          |          |          |          |          |          |          |         |          |          |
|----------------------------------------|----------|----------|----------|----------|----------|----------|----------|----------|----------|---------|----------|----------|
| sp P07014 SDHB_ECOLI-FLIDSR            | 0.478807 | 1.7465   | 1.032315 | 0.352941 | 0.689873 | 1.97505  | 1.256681 | 0.301362 | 0.905144 | 1.97505 | 1.256681 | 0.391879 |
| sp P45523 FKBA_ECOLI-EFDNSYTR          | 1.390491 | 1.7245   | 1.356215 | 1.630518 | 1.261581 | 0.93275  | 1.356215 | 0.834734 | 1.261581 | 0.93275 | 1.356215 | 0.834734 |
| sp P0ABK6 CYSK_ECO57-LQEDESFTNK        | 1.122803 | 1.2154   | 1.658112 | 0.516897 | 1.433912 | 0.77445  | 1.035481 | 0.516561 | 1.865156 | 0.6798  | 0.991403 | 0.542705 |
| sp P27302 TKT1_ECOLI-ALSMDAVQK         | 1.590826 | 1.062328 | 1.026078 | 0.777239 | 1.030073 | 2.7254   | 1.457303 | 0.69974  | 1.294873 | 1.3578  | 0.782259 | 1.773475 |
| sp P0AA18 OMPR_ECO57-YLTEQGFQVR        | 8.867328 | 1.125    | 0.615136 | 0.945121 | 2.710898 | 1.1002   | 1.145901 | 0.444464 | 3.810918 | 1.1002  | 1.145901 | 0.444464 |
| sp P04825 AMPN_ECOLI-GLLQHR            | 0.713718 | 3.685664 | 3.28728  | 1.605402 | 0.902465 | 6.0301   | 5.423963 | 1.755733 | 1.205057 | 6.0301  | 4.225323 | 1.755733 |
| sp P0A9A0 FTNA_ECO57-LSLAGK            | 0.593955 | 1.2253   | 0.806559 | 0.683274 | 1.124192 | 1.2253   | 1.79278  | 1.071339 | 0.656924 | 1.1642  | 2.782723 | 0.758426 |
| sp A7ZTU4 ATPB_ECO24-VYDALEVQNGNER     | 1.42545  | 1.0638   | 0.432847 | 0.149341 | 1.42545  | 1.0638   | 0.71922  | 0.278234 | 1.269235 | 0.7308  | 1.054461 | 0.568786 |
| sp B7LA23 GLPK_ECO55-TMLFNIHTLDWDDK    | 0.316147 | 5.5134   | 6.07175  | 0.671721 | 0.358321 | 5.5134   | 7.107727 | 1.029077 | 0.234984 | 3.7653  | 4.395821 | 0.983474 |
| sp P0AEY0 MALE_ECO57-GYNGLAIEVGK       | 0.892577 | 2.72365  | 1.662903 | 0.414543 | 2.326751 | 2.6294   | 2.29956  | 0.211781 | 2.326751 | 2.6294  | 2.130794 | 0.211781 |
| sp A7ZNR4 GATZ_ECO24-VGPALTFALR        | 0.80152  | 1.036159 | 0.85601  | 0.482984 | 0.912817 | 1.020048 | 1.034183 | 0.741156 | 0.804265 | 0.56765 | 4.460702 | 0.682468 |
| sp P09546 PUTA_ECOLI-EVFGPVLHVVR       | 0.803527 | 0.411072 | 1.207548 | 1.172605 | 2.235822 | 0.4473   | 0.818309 | 1.34279  | 0.789444 | 0.4473  | 1.209397 | 1.34279  |
| sp P0AEQ3 GLNH_ECOLI-AVGDSLEAQQYGIAPFK | 0.691603 | 0.663509 | 0.428925 | 0.768945 | 1.497467 | 0.5644   | 0.633483 | 0.8858   | 0.890489 | 0.5644  | 0.633483 | 0.819296 |
| sp P04825 AMPN_ECOLI-GLENLSGDLYEK      | 0.229843 | 1.152524 | 1.664421 | 10.21953 | 0.229843 | 0.945668 | 1.664421 | 1.310876 | 0.406577 | 0.9598  | 1.380857 | 1.846062 |
| sp P0A9S3 GATD_ECOLI-YDFIGSR           | 1.162926 | 0.7513   | 0.894115 | 1.059033 | 1.532914 | 0.7513   | 0.869267 | 1.157866 | 1.578532 | 0.7513  | 0.880321 | 1.004877 |
| sp P06959 ODP2_ECOLI-AEAPAAAPAAK       | 1.393763 | 1.0523   | 1.161692 | 0.281406 | 1.781594 | 1.4      | 1.457741 | 0.236881 | 1.428232 | 1.4     | 1.313163 | 0.258605 |
| sp P08200 IDH_ECOLI-ISWMEIYTGEK        | 2.393818 | 0.9289   | 3.369506 | 0.798798 | 1.880101 | 0.2958   | 0.683285 | 0.669068 | 1.412654 | 0.5198  | 0.749619 | 1.718354 |
| sp B7MRB2 RL7_ECO81-VAVIK              | 2.636321 | 0.2514   | 8.409584 | 1.232011 | 2.636321 | 0.9235   | 6.359597 | 1.03583  | 2.919347 | 0.9532  | 1.034403 | 0.976538 |
| sp C4ZZ44 ILVC_ECOBW-EIMAPLFQK         | 1.055521 | 2.01605  | 4.854118 | 1.13399  | 2.084197 | 0.6835   | 0.973719 | 1.070884 | 2.845178 | 0.6258  | 1.048118 | 0.835934 |

|                                            |          |          |          |          |          |         |          |          |          |         |          |          |
|--------------------------------------------|----------|----------|----------|----------|----------|---------|----------|----------|----------|---------|----------|----------|
| sp P63285 CLPB_ECO57-ASLSGTQTIK            | 0.950616 | 1.0322   | 0.50974  | 0.725318 | 0.724213 | 1.0322  | 0.500971 | 0.978911 | 0.619088 | 2.3064  | 0.563202 | 1.048392 |
| sp A7ZPS1 PUR7_ECO24-NDTSAGDGAR            | 8.886979 | 2.523481 | 0.592453 | 0.765841 | 3.041385 | 2.9663  | 0.694074 | 0.643453 | 3.041634 | 2.08965 | 0.694074 | 0.63885  |
| sp B1IVF1 ZAPB_ECOLC-NNSLSQEVQNAQHQR       | 2.308035 | 0.478    | 1.369122 | 3.821659 | 3.723469 | 0.5676  | 1.070354 | 1.06774  | 1.696088 | 0.5228  | 0.878173 | 1.432088 |
| sp B1XFM6 CLPX_ECODH-FGLIPEFIGR            | 2.417085 | 0.7109   | 1.085008 | 0.05524  | 1.992828 | 0.7109  | 0.977482 | 0.067184 | 1.684216 | 0.8199  | 1.05414  | 0.081604 |
| sp A8A6H0 TNAE_ECOHS-EEAIK                 | 0.716759 | 0.64145  | 0.82615  | 4.445296 | 0.767399 | 0.5991  | 1.1578   | 0.714772 | 0.825372 | 0.755   | 1.196297 | 0.589597 |
| sp P0AG68 RS1_ECOL6-GATVELADGVEGYLR        | 1.811424 | 1.297661 | 0.451938 | 1.072059 | 2.658504 | 1.4101  | 0.451938 | 0.159834 | 5.209308 | 1.4101  | 1.884843 | 0.72844  |
| sp P12758 UDP_ECOLI-NDLQGATLAIVPGDPDR      | 3.089306 | 1.2068   | 1.07335  | 0.520769 | 1.682178 | 1.2332  | 0.533452 | 0.425908 | 1.111479 | 1.2068  | 0.481957 | 0.323317 |
| sp P0AGD5 SODF_ECO57-AQFTDAIK              | 0.727451 | 1.0578   | 1.160231 | 0.790787 | 0.82863  | 1.0823  | 1.299777 | 0.840959 | 1.436971 | 1.10925 | 1.303216 | 0.815383 |
| sp A7ZPW6 PEPB_ECO24-ITLSTQPADAR           | 0.43899  | 1.1742   | 0.798009 | 1.137258 | 0.409042 | 1.1742  | 0.634783 | 1.070218 | 0.7348   | 1.56135 | 1.011951 | 1.103702 |
| sp P75694 YAH0_ECOLI-GADVVLVTSGQTDNK       | 1.331982 | 1.8682   | 0.989442 | 0.420048 | 1.407501 | 1.5216  | 0.909788 | 0.39838  | 1.312585 | 1.5216  | 0.871814 | 0.382016 |
| sp A7ZSD0 MDH_ECO24-DIALGEEFVNK            | 1.399869 | 0.9429   | 0.772216 | 0.868053 | 1.032979 | 1.02735 | 0.884079 | 0.480389 | 1.020332 | 1.21925 | 0.871238 | 0.39619  |
| sp P0A9B3 G3P_ECOL6-VGINGFGR               | 4.457468 | 1.39645  | 0.641973 | 0.135863 | 5.203624 | 1.39645 | 0.846961 | 0.661483 | 4.579526 | 1.3477  | 0.839452 | 0.661483 |
| sp B7UIL4 RS2_ECO27-VHIINLEK               | 0.441541 | 1.0048   | 0.85036  | 0.195965 | 0.441541 | 1.0228  | 1.20656  | 0.679833 | 0.488708 | 1.0228  | 1.20656  | 0.693255 |
| sp A7ZUK1 RPOB_ECO24-SVGEMAENQFR           | 4.463689 | 1.1146   | 0.86843  | 1.608344 | 1.692422 | 1.1146  | 0.761092 | 0.712858 | 2.177885 | 1.1146  | 0.702773 | 0.712858 |
| sp A7ZHT6 SYP_ECO24-TGDIVEYLVK             | 1.928818 | 0.89265  | 1.403767 | 1.405588 | 1.740516 | 0.38765 | 0.985281 | 1.405588 | 1.03945  | 0.54105 | 0.459445 | 1.254189 |
| sp P21513 RNE_ECOLI-VPLPVVAQTAPEQQEENNADNR | 0.573538 | 0.885838 | 0.958928 | 6.112598 | 1.4947   | 0.83155 | 1.02538  | 5.789991 | 0.692446 | 0.9677  | 0.872055 | 5.590849 |
| sp A7ZSD0 MDH_ECO24-SDLFVNAGIVK            | 1.694451 | 1.0623   | 0.383123 | 0.210344 | 4.305922 | 1.38095 | 0.293255 | 0.175274 | 3.968683 | 1.2647  | 0.674718 | 0.180804 |
| sp P0A7W3 RS5_ECO57-AYGSTNPINVVR           | 2.023837 | 0.8392   | 0.992631 | 0.457663 | 1.998074 | 0.8392  | 0.958001 | 0.422537 | 1.783473 | 1.2193  | 0.958001 | 0.454522 |
| sp P09394 GLPQ_ECOLI-GASGYLPEHTLPAK        | 0.878486 | 0.8921   | 0.904973 | 1.201624 | 0.802161 | 0.8921  | 0.988959 | 1.188982 | 0.702209 | 0.90255 | 0.941547 | 0.986873 |

|                                         |          |          |          |          |          |          |          |          |          |          |          |          |
|-----------------------------------------|----------|----------|----------|----------|----------|----------|----------|----------|----------|----------|----------|----------|
| sp B7UIL4 RS2_ECO27-LENSLGGIK           | 1.862259 | 2.3497   | 0.770584 | 0.868355 | 0.405791 | 2.21005  | 0.770584 | 1.047331 | 1.55436  | 2.0704   | 1.554774 | 1.047331 |
| sp P0AEY0 MALE_ECO57-DLLPNPPK           | 0.766386 | 1.42465  | 0.861759 | 1.005942 | 1.430135 | 1.4877   | 0.921093 | 0.955782 | 1.527873 | 1.3616   | 1.091254 | 0.62565  |
| sp B7MZ75 ENO_ECO81-YVLAGEGNK           | 0.456541 | 1.1449   | 1.435488 | 0.727828 | 0.34911  | 1.20675  | 1.39977  | 0.724587 | 1.137532 | 1.3347   | 0.99218  | 0.688765 |
| sp P0A9Q7 ADHE_ECOLI-QILLDTYYGR         | 1.398201 | 1.8247   | 1.68816  | 11.74953 | 1.695137 | 1.8247   | 1.188647 | 11.74953 | 2.364971 | 1.8247   | 1.084079 | 4.143506 |
| sp B5Z3U4 TIG_ECO5E-ETTFNELMNQQA        | 1.09488  | 1.4891   | 1.859559 | 1.67508  | 1.317704 | 1.7075   | 1.703954 | 1.67508  | 1.079619 | 1.40655  | 1.20465  | 1.635692 |
| sp A7ZP63 GLPB_ECO24-EPILGLDVLQTATR     | 0.462284 | 1.00095  | 1.48738  | 0.393245 | 0.914973 | 1.00095  | 0.508398 | 0.560167 | 1.249288 | 1.3093   | 0.667295 | 1.931113 |
| sp P23843 OPPA_ECOLI-LGMDR              | 1.526146 | 0.2116   | 7.671032 | 10.36882 | 0.480383 | 0.2116   | 7.671032 | 4.173293 | 0.719557 | 0.6071   | 7.671032 | 1.052452 |
| sp P0AGF0 SUCD_ECOL6-VGIVSR             | 0.954415 | 0.690411 | 0.80848  | 3.347036 | 0.542734 | 0.751428 | 0.521039 | 19.5316  | 0.738822 | 0.749676 | 0.521039 | 19.5316  |
| sp P19926 AGP_ECOLI-WPEWDVPGGQLTTK      | 0.880948 | 1.2719   | 1.053394 | 0.250364 | 0.773368 | 1.2693   | 1.471826 | 0.262231 | 0.773368 | 1.2568   | 1.089293 | 0.439772 |
| sp P0A9B3 G3P_ECOL6-DPANLK              | 0.721039 | 2.97     | 1.510204 | 4.139456 | 0.875904 | 1.3352   | 2.555718 | 4.139456 | 0.841407 | 1.3352   | 0.812723 | 2.072328 |
| sp P0A8M1 SYN_ECOL6-VSTLDLENLPR         | 1.257255 | 1.1763   | 2.679815 | 0.761487 | 0.778814 | 0.64315  | 0.847233 | 0.464415 | 0.778814 | 1.1763   | 1.326981 | 0.234694 |
| sp P0A8N6 SYK2_ECO57-ASFVTLQDVGGR       | 0.640279 | 2.0133   | 1.141178 | 1.022934 | 0.738294 | 1.3971   | 0.907505 | 0.883836 | 0.670604 | 1.2109   | 0.933842 | 0.838566 |
| sp C4ZRQ8 DAPD_ECOBW-VGINELLR           | 0.317931 | 2.7337   | 0.693463 | 0.287718 | 0.273099 | 1.8714   | 0.384863 | 0.271518 | 0.316269 | 1.63615  | 0.310418 | 0.415294 |
| sp B7LA23 GLPK_ECO55-AMAWEEHDE          | 0.653777 | 1.3262   | 0.467869 | 2.440068 | 0.818504 | 1.096    | 0.530574 | 1.701001 | 0.698906 | 1.41985  | 0.422301 | 1.480022 |
| sp P0A6Y9 DNAK_ECOL6-DDDVVDAAEFEEVK     | 1.330101 | 1.5964   | 1.089096 | 0.268586 | 2.161622 | 1.50755  | 0.941466 | 0.339849 | 1.460129 | 1.5055   | 0.777393 | 0.420033 |
| sp B7LA23 GLPK_ECO55-ETTIVWEK           | 0.589432 | 0.8653   | 0.67022  | 0.763901 | 1.138554 | 0.758    | 0.662364 | 0.736826 | 1.27014  | 0.807    | 0.736735 | 0.727964 |
| sp A1AIG0 RPOC_ECOK1-AAAESSIQVK         | 0.622589 | 1.3841   | 0.914665 | 0.476334 | 1.877839 | 0.8885   | 0.406474 | 0.36642  | 1.877839 | 0.8885   | 0.186412 | 0.458828 |
| sp B7ULJ1 RL33_ECO27-LVSSAGTGHFYTTTK    | 0.789604 | 1.20725  | 0.401835 | 2.299812 | 1.209012 | 1.20725  | 0.597216 | 2.299812 | 1.024058 | 1.20725  | 0.914833 | 2.299812 |
| sp B1X8W6 ARNB_ECODH-AIIPVHYAGAPADIDAIR | 0.944276 | 3.0873   | 0.704205 | 1.585338 | 1.144107 | 1.47505  | 0.639822 | 1.136549 | 1.053004 | 1.0747   | 0.758061 | 1.111162 |

|                                           |          |          |          |          |          |          |          |          |          |          |          |          |
|-------------------------------------------|----------|----------|----------|----------|----------|----------|----------|----------|----------|----------|----------|----------|
| sp P0AFG9 ODP1_ECO57-LPYITFPEGSEEHTYLHAQR | 2.499435 | 0.6198   | 0.965263 | 0.292752 | 2.836775 | 0.7318   | 1.268475 | 0.362855 | 2.968719 | 0.6672   | 0.965263 | 0.530505 |
| sp A1AGI6 RPOA_ECOK1-DVLASR               | 1.742055 | 0.952021 | 1.027909 | 0.22613  | 1.854978 | 1.0066   | 0.971892 | 0.22499  | 2.132814 | 1.4053   | 0.6652   | 0.14844  |
| sp P0A9A0 FTNA_ECO57-ELSTLDTQN            | 0.180454 | 2.5399   | 3.136851 | 2.01273  | 0.586893 | 1.04195  | 1.909531 | 1.655999 | 0.897507 | 1.1427   | 1.573776 | 1.874341 |
| sp P33602 NUOG_ECOLI-ASVESNFALR           | 0.607434 | 3.2402   | 0.624488 | 0.787858 | 0.465191 | 3.2402   | 0.860096 | 0.747735 | 0.638399 | 3.2402   | 0.836753 | 0.530701 |
| sp P0A9X5 MREB_ECOL6-NYGSLIGEATAER        | 1.02105  | 1.031963 | 0.449874 | 0.635482 | 1.826379 | 1.006159 | 0.290417 | 0.134357 | 2.130572 | 0.4488   | 0.702962 | 0.635482 |
| sp P00968 CARB_ECOLI-GLDLSPTK             | 0.945059 | 0.8837   | 1.095223 | 0.325138 | 0.774349 | 0.9843   | 1.317858 | 1.045385 | 0.424886 | 0.934    | 1.431785 | 1.047295 |
| sp A8A0Q4 IHFA_ECOHS-TGEDIPITAR           | 0.84842  | 1.4585   | 1.243886 | 0.462432 | 1.01142  | 1.4585   | 0.748256 | 0.655074 | 1.01142  | 1.4585   | 0.748256 | 0.808886 |
| sp B7MGS0 DPS_ECO45-ATNLLYTR              | 0.682185 | 0.750864 | 1.371164 | 0.32965  | 1.335133 | 0.879991 | 2.00756  | 0.308457 | 1.335133 | 1.01343  | 0.494921 | 0.362811 |
| sp P0A6Y9 DNAK_ECOL6-VLENAEGDR            | 1.348822 | 0.81     | 0.778448 | 4.434171 | 1.662429 | 0.81     | 0.778448 | 2.912495 | 1.246821 | 1.1658   | 0.399249 | 4.168412 |
| sp A7ZSL0 RS10_ECO24-DQYEIR               | 2.324799 | 1.2219   | 0.94146  | 3.981431 | 2.34938  | 1.2219   | 1.006645 | 3.981431 | 2.076206 | 1.6646   | 0.990604 | 2.881569 |
| sp P33602 NUOG_ECOLI-APVEDQAR             | 0.836257 | 1.401528 | 6.748936 | 2.890955 | 1.203997 | 1.266204 | 7.718493 | 4.387108 | 4.582278 | 0.7968   | 3.758863 | 2.719796 |
| sp P0AC34 FUMA_ECOL6-TYLYQETK             | 0.255256 | 2.183553 | 2.26192  | 1.11747  | 0.202823 | 2.508885 | 1.952186 | 1.03397  | 0.74435  | 3.308    | 6.354541 | 0.587765 |
| sp P0ABC8 HFLK_ECO57-AQTILEAQGEVAR        | 3.919445 | 1.14462  | 1.021189 | 0.536494 | 1.46061  | 1.108232 | 1.183054 | 0.486829 | 1.46061  | 1.074484 | 0.570867 | 0.475749 |
| sp P0ABH7 CISY_ECOLI-HTMIHEQITR           | 0.371082 | 0.93325  | 1.711854 | 0.166995 | 0.998372 | 0.93325  | 1.711854 | 0.163724 | 0.998372 | 0.93325  | 1.300764 | 0.554231 |
| sp P0A6Z5 HTPG_ECO57-GTLEDPNLFIR          | 0.727348 | 1.1288   | 0.951361 | 1.840465 | 1.531126 | 1.1288   | 0.612081 | 1.2736   | 1.566078 | 1.1742   | 0.724632 | 1.658595 |
| sp P0AB82 ILVE_ECO57-AGGNYSLLVGSEAR       | 0.618104 | 0.66985  | 0.681748 | 0.465534 | 0.898198 | 0.6597   | 0.872965 | 0.461068 | 1.125492 | 0.6597   | 1.21542  | 0.461068 |
| sp A7ZTP1 IBPA_ECO24-FQLAENIHVR           | 0.360413 | 1.185021 | 0.419211 | 4.871498 | 0.360413 | 0.65263  | 0.419211 | 4.871498 | 0.360413 | 0.512888 | 0.31645  | 3.396226 |
| sp A7ZRU7 RS21_ECO24-AGVLAEVR             | 1.272418 | 1.130476 | 1.605616 | 2.050828 | 1.758417 | 0.8519   | 1.040027 | 2.15762  | 1.37045  | 0.8519   | 0.474437 | 2.189627 |
| sp A7ZST1 PCKA_ECO24-MQLIGGTWYGEMK        | 0.590143 | 0.8916   | 0.836475 | 1.918333 | 0.454449 | 0.932    | 0.744215 | 0.704454 | 0.464656 | 0.96215  | 0.815337 | 0.653149 |

|                                            |          |          |          |          |          |          |          |          |          |         |          |          |
|--------------------------------------------|----------|----------|----------|----------|----------|----------|----------|----------|----------|---------|----------|----------|
| sp B7UK21 RS11_ECO27-QGNALGWATAGGSGFR      | 1.384161 | 0.731969 | 0.664061 | 1.647416 | 0.944505 | 0.6667   | 1.046548 | 2.019993 | 0.944505 | 0.6667  | 0.811924 | 1.957452 |
| sp P36683 ACNB_ECOLI-VADGATVVSTSTR         | 4.002651 | 1.39605  | 0.839992 | 2.116212 | 5.424594 | 1.39905  | 1.313143 | 0.829871 | 4.46885  | 1.30735 | 1.184719 | 0.662039 |
| sp P08200 IDH_ECOLI-GPLTTPVGGGIR           | 3.749533 | 1.01065  | 2.905815 | 0.854867 | 0.884179 | 1.1814   | 1.28919  | 0.933498 | 1.837696 | 1.1814  | 1.065047 | 1.06926  |
| sp A7ZHT6 SYP_ECO24-AGPGSLGPVNMPIPVIDR     | 1.185632 | 0.80595  | 0.69372  | 0.740846 | 1.184509 | 0.80595  | 0.796116 | 0.690998 | 1.185632 | 0.80595 | 0.917907 | 0.604806 |
| sp P03852 YPB1_ECOLX-NIMVQGADFR            | 0.800427 | 0.4699   | 0.596143 | 1.124914 | 0.549549 | 0.605    | 0.659866 | 1.003743 | 0.800427 | 0.53745 | 0.67197  | 0.527558 |
| sp B7MGS0 DPS_ECO45-ATVELLNR               | 0.736876 | 1.661238 | 1.49056  | 1.455814 | 1.093099 | 2.2236   | 1.838941 | 1.455814 | 1.093099 | 1.3426  | 2.082529 | 2.462578 |
| sp P62593 BLAT_ECOLX-QIAEIGASLIK           | 5.540439 | 1.6313   | 1.27693  | 2.545485 | 0.808249 | 1.6016   | 1.27693  | 1.032966 | 0.962282 | 1.2271  | 0.769289 | 2.216326 |
| sp A1AGI5 RL17_ECOK1-AGDNAPMAYIELVDR       | 1.448336 | 1.0891   | 0.206844 | 0.173505 | 2.533569 | 0.6944   | 0.265299 | 0.261592 | 2.179257 | 0.6944  | 0.409413 | 0.185858 |
| sp A7ZUJ6 RL11_ECO24-SFTFVTK               | 0.824346 | 1.17725  | 0.456788 | 0.344397 | 0.824346 | 1.17725  | 0.520013 | 0.54581  | 3.010984 | 0.9234  | 0.589754 | 0.683727 |
| sp P0A9P2 DLDH_ECO57-GVHEGHVAAEVIAGK       | 0.308568 | 0.837575 | 4.41957  | 0.465967 | 0.178279 | 0.827544 | 13.32347 | 0.452004 | 0.513725 | 0.5604  | 3.930218 | 1.060473 |
| sp Q0TF64 SYE_ECOL5-SASAFNTDK              | 0.18089  | 2.2027   | 1.48321  | 0.855584 | 0.551301 | 1.57005  | 0.951499 | 1.500688 | 1.378059 | 2.6244  | 2.634323 | 1.243897 |
| sp A1AGI6 RPOA_ECOK1-IAYNVEAAR             | 0.931741 | 0.714503 | 1.12652  | 0.958366 | 0.743016 | 0.184    | 1.685059 | 0.575964 | 0.743016 | 0.184   | 2.802345 | 1.529077 |
| sp P0A8A0 YEBC_ECOLI-LGGGDPDANPR           | 0.609856 | 0.4296   | 1.923997 | 0.936625 | 0.676304 | 0.4763   | 1.59144  | 0.966949 | 1.329631 | 0.66775 | 1.014328 | 1.885423 |
| sp P0AA18 OMPR_ECO57-SVANAEQMDR            | 4.297232 | 2.9037   | 0.377307 | 0.768109 | 2.724043 | 2.9443   | 0.480243 | 0.519069 | 2.433232 | 1.8929  | 0.480243 | 0.521405 |
| sp B7MZ75 ENO_ECO81-AAAAAK                 | 2.443606 | 3.2428   | 1.02396  | 5.142367 | 1.453348 | 3.2428   | 0.627043 | 0.307369 | 2.70514  | 2.4625  | 0.588604 | 0.929252 |
| sp P0A9B3 G3P_ECOL6-LVSWYDNETGYSNK         | 0.832377 | 0.9442   | 0.673542 | 1.339053 | 0.586555 | 0.9998   | 0.680486 | 1.206666 | 1.141662 | 0.972   | 0.816272 | 1.21208  |
| sp P00968 CARB_ECOLI-SLAEQGVTK             | 0.261386 | 1.8488   | 1.805437 | 5.799871 | 0.88724  | 1.34655  | 2.187135 | 7.749433 | 1.568543 | 0.8443  | 1.477477 | 3.052831 |
| sp P0ABS3 DKSA_ECO57-TVTHMQDEAANFPDPVDR    | 1.64308  | 0.6325   | 0.953892 | 3.5529   | 1.040973 | 0.9349   | 0.837574 | 2.762052 | 1.780511 | 0.9349  | 0.654709 | 2.095218 |
| sp P03852 YPB1_ECOLX-FVNTDVGVPQGSQQHPAMQIR | 0.499731 | 0.710892 | 2.329001 | 0.45584  | 0.740333 | 0.5212   | 1.600199 | 0.36505  | 0.808535 | 0.5212  | 0.590782 | 0.460599 |



|                                        |          |          |          |          |          |          |          |          |          |         |          |          |
|----------------------------------------|----------|----------|----------|----------|----------|----------|----------|----------|----------|---------|----------|----------|
| sp P0A3B2 TYPA_ECO27-LDYVIPSR          | 0.142399 | 3.295443 | 0.746485 | 0.668901 | 1.208994 | 3.6518   | 0.404596 | 0.787435 | 1.417901 | 3.6518  | 0.881477 | 1.426272 |
| sp P0A9S3 GATD_ECOLI-DGGFAEYIVVK       | 1.13572  | 0.69505  | 0.443457 | 0.418939 | 1.206958 | 0.4552   | 0.437602 | 0.787639 | 1.288054 | 0.9349  | 0.482278 | 0.736366 |
| sp B7MLA1 PYRG_ECO45-IPGLLK            | 1.24003  | 0.392391 | 1.010314 | 1.245478 | 3.611034 | 0.423759 | 1.311745 | 1.04795  | 3.611034 | 0.365   | 0.552991 | 1.878673 |
| sp P09546 PUTA_ECOLI-GESNILLER         | 0.858085 | 1.31781  | 1.884343 | 0.851307 | 0.478435 | 1.47585  | 1.321172 | 1.611042 | 0.621655 | 1.47585 | 1.047344 | 1.373624 |
| sp P0A910 OMPA_ECOLI-GMGESNPVTGNTCDNVK | 1.365628 | 1.5377   | 1.088138 | 0.283083 | 1.277562 | 1.18625  | 1.214862 | 0.833995 | 1.213153 | 0.8955  | 1.429314 | 0.716476 |
| sp A8A5E7 EFG_ECOHS-GQESEVTGVK         | 1.06556  | 0.7367   | 0.941883 | 0.877105 | 1.116842 | 0.5331   | 0.943727 | 0.926394 | 1.116842 | 0.5331  | 0.943727 | 1.41873  |
| sp P0A9G6 ACEA_ECOLI-TQQIEELQK         | 1.838393 | 1.975039 | 0.641346 | 3.80958  | 2.744649 | 4.8146   | 0.426551 | 7.305246 | 6.137589 | 2.84555 | 0.052071 | 1.844763 |
| sp P0A910 OMPA_ECOLI-LGGMVWR           | 1.201901 | 3.2006   | 1.516681 | 2.166943 | 1.2171   | 3.2006   | 1.757748 | 3.316259 | 1.572046 | 2.5445  | 0.273963 | 1.650332 |
| sp B7M1N4 RL3_ECO8A-NLLLVK             | 0.229374 | 0.9238   | 2.952666 | 3.143091 | 2.529901 | 1.2107   | 3.191156 | 1.182273 | 2.529901 | 1.0187  | 2.269691 | 1.317088 |
| sp P0A9A7 FTSZ_ECOL6-LDEFETVGNTIR      | 1.106218 | 0.7778   | 0.522035 | 2.950097 | 2.203236 | 2.82435  | 0.550637 | 1.945878 | 3.01379  | 2.82435 | 0.330198 | 0.509754 |
| sp P0AEH6 ELAB_ECOL6-VSQASDSYYYR       | 4.000123 | 1.052    | 1.435515 | 0.637852 | 1.180086 | 1.09255  | 1.114059 | 0.76793  | 0.96157  | 1.052   | 1.36788  | 0.41646  |
| sp P00968 CARB_ECOLI-EYQIMR            | 0.778187 | 0.562295 | 1.156364 | 2.671378 | 1.404122 | 0.6877   | 0.4692   | 3.452982 | 1.404122 | 0.6877  | 0.4692   | 3.171626 |
| sp A1AGC3 RS9_ECOK1-GGGISGQAGAIR       | 1.627154 | 1.35785  | 1.272727 | 1.764429 | 1.564118 | 1.8675   | 1.405983 | 1.878594 | 1.43764  | 1.7211  | 1.240428 | 1.556756 |
| sp A1AGC3 RS9_ECOK1-QPLELVDMVEK        | 0.263523 | 1.7061   | 1.755998 | 1.366558 | 0.694954 | 2.6282   | 1.376813 | 1.420604 | 0.718992 | 3.71825 | 3.216763 | 1.420604 |
| sp P0A9B3 G3P_ECOL6-KVVMTPGSK          | 0.920048 | 0.5077   | 0.634211 | 1.580854 | 0.920048 | 0.5077   | 1.12473  | 1.478085 | 1.228971 | 0.6829  | 0.852936 | 0.608238 |
| sp P0A807 RRF_ECO57-EAELMQF            | 1.672812 | 1.23585  | 0.954722 | 1.819744 | 2.338776 | 0.6347   | 1.007685 | 1.658597 | 2.338776 | 0.6347  | 1.007685 | 2.110582 |
| sp P00490 PHSM_ECOLI-YSDGDK            | 2.842885 | 1.8089   | 0.631386 | 0.772877 | 3.719228 | 0.6316   | 0.69655  | 1.064557 | 3.719228 | 0.76055 | 0.904263 | 1.354692 |
| sp P77774 BAMB_ECOLI-ISQATGSTEIDR      | 0.759454 | 0.434    | 0.631065 | 0.225727 | 0.219255 | 0.5303   | 0.601188 | 0.193306 | 0.804033 | 0.5303  | 0.847981 | 0.193306 |
| sp P0AFG9 ODP1_ECO57-MNMDGVR           | 0.261873 | 0.6645   | 0.662799 | 1.25672  | 0.375223 | 0.9144   | 0.338263 | 1.382217 | 0.375223 | 2.0063  | 0.338263 | 1.382217 |

|                                    |          |          |          |          |          |          |          |          |          |         |          |          |
|------------------------------------|----------|----------|----------|----------|----------|----------|----------|----------|----------|---------|----------|----------|
| sp B7M1N4 RL3_ECO8A-DLANDGYR       | 0.662956 | 1.1192   | 1.732202 | 1.209363 | 3.115153 | 1.2505   | 0.573777 | 2.257617 | 3.834898 | 1.1117  | 0.72185  | 2.305469 |
| sp P0ABH7 CISY_ECOLI-QLYTGYEK      | 1.094374 | 1.0564   | 0.852279 | 1.872633 | 0.832055 | 1.1008   | 0.90914  | 0.801854 | 0.941167 | 1.1304  | 0.975006 | 0.642853 |
| sp P0AFG9 ODP1_ECO57-LFAEQVR       | 13.04435 | 4.7485   | 3.657845 | 1.494475 | 9.440567 | 2.94585  | 2.841273 | 1.2192   | 6.777921 | 0.98975 | 3.68021  | 1.916784 |
| sp P0ABC8 HFLK_ECO57-DQGPPDLDIFR   | 5.349275 | 0.90535  | 0.413969 | 0.863537 | 4.619886 | 0.668    | 0.519261 | 0.862147 | 3.292596 | 1.2132  | 1.137928 | 1.23946  |
| sp P0A7D6 PURA_ECO57-GIGPAYEDK     | 2.347577 | 1.12745  | 1.835047 | 0.729347 | 3.274733 | 0.7561   | 1.38533  | 0.56543  | 2.550801 | 1.028   | 1.552298 | 0.744062 |
| sp P09546 PUTA_ECOLI-AQMDGLEGYVYTR | 1.211121 | 0.81042  | 0.58448  | 1.230605 | 0.575673 | 0.8298   | 0.673808 | 1.662453 | 0.572768 | 0.8298  | 0.673808 | 1.685956 |
| sp B7LE54 FABA_ECO55-GELFGAK       | 0.638256 | 0.9314   | 0.238327 | 2.335967 | 0.629007 | 0.63865  | 0.375281 | 2.226167 | 0.47397  | 0.9314  | 0.145077 | 1.607045 |
| sp P77395 CNOX_ECOLI-NEEALELLFGHLR | 0.641301 | 1.319743 | 1.121129 | 0.414809 | 1.055568 | 1.607    | 1.324971 | 0.386532 | 1.29535  | 0.7208  | 1.429538 | 0.346886 |
| sp P02925 RBSB_ECOLI-ELANVQDLTVR   | 1.678931 | 1.8776   | 0.910355 | 2.332258 | 1.048866 | 1.4238   | 0.822282 | 1.203807 | 0.983396 | 1.6507  | 1.065326 | 0.732431 |
| sp A7ZHB5 SYI_ECO24-AAQEDILK       | 2.106927 | 2.85335  | 2.817483 | 0.870594 | 2.106927 | 1.24065  | 2.817483 | 0.482018 | 1.669588 | 1.2692  | 2.817483 | 0.725696 |
| sp P0AC34 FUMA_ECOL6-ALLTPGK       | 0.414142 | 3.8674   | 0.069511 | 6.828461 | 1.216276 | 0.432    | 0.189872 | 6.426917 | 1.216276 | 1.2897  | 0.630587 | 5.869453 |
| sp P15288 PEPD_ECOLI-AALIAK        | 2.039747 | 3.2761   | 36.74016 | 2.957836 | 0.653794 | 1.74355  | 10.74005 | 1.48817  | 0.336008 | 0.56615 | 5.129032 | 1.28974  |
| sp P0A819 METK_ECO57-NIVAAGLADR    | 12.39802 | 2.4723   | 0.469554 | 1.103463 | 6.638273 | 2.3164   | 0.643453 | 0.661579 | 6.638273 | 2.3164  | 1.024203 | 1.264005 |
| sp P0AGF0 SUCD_ECOL6-FAALEAAGVK    | 0.868535 | 0.5597   | 0.874757 | 1.24234  | 0.720797 | 0.6777   | 1.224018 | 1.159145 | 0.805518 | 0.6777  | 1.440576 | 0.814436 |
| sp P0AC41 SDHA_ECOLI-EVLESR        | 0.885675 | 0.572448 | 12.83736 | 2.075791 | 0.901347 | 0.450619 | 7.053011 | 3.233007 | 0.347858 | 0.701   | 7.053011 | 2.538194 |
| sp A7ZSL4 EFTU1_ECO24-ALEGDAEWEAK  | 1.585899 | 2.0276   | 0.670546 | 0.879579 | 1.083643 | 1.2467   | 0.626387 | 1.510108 | 1.567818 | 1.4219  | 0.725397 | 1.091599 |
| sp B7MRB2 RL7_ECO81-GATGLGLK       | 0.836379 | 2.1704   | 0.415004 | 0.834008 | 0.710337 | 0.6362   | 0.698473 | 0.659744 | 1.090768 | 0.6427  | 0.977878 | 0.704073 |
| sp B6I5E3 LEPA_ECOSE-VDALALITHR    | 0.395562 | 0.5889   | 1.255205 | 1.123155 | 0.41128  | 0.432    | 0.957325 | 1.345992 | 0.440179 | 0.432   | 1.13346  | 1.103783 |
| sp A8A6H0 TNAE_ECOHS-GAEQIYIPVLIK  | 1.064332 | 0.8577   | 0.610033 | 0.562727 | 1.076065 | 0.70505  | 0.51574  | 0.60059  | 0.97922  | 0.8808  | 0.725799 | 0.577062 |

|                                          |          |          |          |          |          |          |          |          |          |          |          |          |
|------------------------------------------|----------|----------|----------|----------|----------|----------|----------|----------|----------|----------|----------|----------|
| sp A8A5E7 EFG_ECOHS-VEVETPEENTGDVIGDLSR  | 1.102127 | 1.46825  | 0.486351 | 1.466738 | 0.791463 | 1.034    | 1.441322 | 0.922533 | 0.935003 | 1.2308   | 1.110521 | 0.695191 |
| sp A7ZTP0 IBPB_ECO24-LANALQNAGESQSFPYNIK | 0.898681 | 0.476    | 0.700808 | 0.788753 | 0.399683 | 0.9057   | 1.752899 | 0.57719  | 0.404866 | 0.9057   | 1.249816 | 0.574756 |
| sp P36683 ACNB_ECOLI-WMIAEGYGDR          | 0.788059 | 1.057313 | 0.278934 | 1.045993 | 0.109486 | 1.2248   | 0.284561 | 0.628008 | 0.109486 | 1.2248   | 0.284561 | 0.489016 |
| sp Q1R626 RL18_ECOUT-EAGLQF              | 2.978822 | 0.1841   | 1.078575 | 2.55004  | 0.589557 | 0.7713   | 0.675722 | 2.76866  | 0.611952 | 0.7713   | 0.678973 | 1.426643 |
| sp A7ZQ54 GRPE_ECO24-SMLDVVR             | 0.621846 | 0.998238 | 1.839748 | 0.330805 | 0.700658 | 0.873296 | 2.181972 | 0.314506 | 1.433348 | 1.116269 | 1.684002 | 0.290603 |
| sp B7N6A6 NDK_ECOLU-MLHLTVEQAR           | 1.77478  | 0.1962   | 2.977822 | 1.424417 | 2.650216 | 0.1962   | 2.857668 | 1.282194 | 3.200512 | 0.3572   | 1.737209 | 4.201431 |
| sp A7ZPD1 ACCD_ECO24-EGVVVPPVPDQEPEA     | 0.972213 | 1.1614   | 0.674653 | 2.182543 | 1.085914 | 1.1154   | 0.924871 | 2.070039 | 1.362843 | 1.1614   | 1.174761 | 1.994773 |
| sp A1A7K0 GSA_ECOK1-ADGAYLYDVDGK         | 1.342769 | 1.4385   | 1.636127 | 0.662265 | 1.873196 | 1.8865   | 1.294048 | 0.917787 | 1.838896 | 1.8865   | 1.255925 | 1.538162 |
| sp A1AGK0 RS17_ECOK1-HPIY GK             | 0.776455 | 1.49585  | 0.866898 | 0.426836 | 0.976889 | 2.8377   | 1.192088 | 0.483043 | 0.666311 | 2.8377   | 0.766291 | 0.652952 |
| sp P00968 CARB_ECOLI-FPGVDPLLGPEMR       | 2.426233 | 0.93615  | 0.701604 | 0.773364 | 2.144583 | 0.8623   | 0.761425 | 0.694769 | 2.890902 | 0.7882   | 0.761425 | 0.834781 |
| sp P0A6Z5 HTPG_ECO57-DGETVISWEK          | 1.081424 | 1.3699   | 0.763997 | 0.357302 | 1.246486 | 1.3699   | 0.954471 | 0.466684 | 1.449262 | 1.3699   | 1.025262 | 0.447449 |
| sp B5Z2K8 RL9_ECO5E-MQVILLDK             | 0.506609 | 0.99595  | 1.883825 | 0.288658 | 3.047786 | 0.91     | 1.5614   | 0.293884 | 0.635667 | 0.5898   | 1.539354 | 0.269929 |
| sp B5Z2K8 RL9_ECO5E-AGDEGK               | 3.408986 | 1.48645  | 0.679959 | 0.434844 | 3.189986 | 1.73185  | 0.711465 | 0.675184 | 2.42472  | 1.6308   | 0.694146 | 0.690672 |
| sp B5YXD9 ATPD_ECO5E-AGDMVIDGSVR         | 1.346115 | 2.23135  | 0.554587 | 0.979409 | 1.391423 | 2.23135  | 0.566639 | 0.802018 | 0.987714 | 1.0209   | 0.577528 | 0.633974 |
| sp P63285 CLPB_ECO57-GTLADILK            | 0.117615 | 0.3405   | 0.345861 | 0.289293 | 0.299442 | 0.5086   | 2.151994 | 0.289293 | 0.299442 | 0.5253   | 2.133808 | 0.289293 |
| sp Q8FB69 PUR2_ECOL6-LADDEQVVTSGGR       | 1.141737 | 1.163    | 0.278662 | 0.289931 | 1.177484 | 1.2545   | 0.407617 | 0.266168 | 1.017664 | 2.2106   | 1.095764 | 0.874923 |
| sp P0A7W3 RS5_ECO57-VFMQPASEGTGHIAGGAMR  | 1.004404 | 0.61485  | 0.203225 | 0.280377 | 1.168553 | 0.9467   | 0.315953 | 0.280377 | 0.61123  | 1.14005  | 0.379593 | 0.302887 |
| sp P39325 YTFQ_ECOLI-GFAEAIK             | 0.78783  | 0.1862   | 0.470142 | 3.800833 | 0.431205 | 0.3358   | 0.390094 | 1.184845 | 0.484928 | 0.3358   | 0.249057 | 1.184845 |
| sp A7ZUK1 RPOB_ECO24-DDIIDVMK            | 1.399735 | 1.675192 | 0.781562 | 0.988412 | 1.012457 | 2.93905  | 1.044561 | 0.74882  | 1.012457 | 1.7251   | 1.620133 | 0.866687 |

|                                           |          |          |          |          |          |          |          |          |          |          |          |          |
|-------------------------------------------|----------|----------|----------|----------|----------|----------|----------|----------|----------|----------|----------|----------|
| sp P0A7V4 RS3_ECOL6-EFADNLDSDFK           | 2.572825 | 1.5594   | 0.942349 | 0.36243  | 2.286229 | 2.5175   | 2.665151 | 1.484114 | 2.552031 | 2.5175   | 3.047962 | 1.715581 |
| sp P0A9A7 FTSZ_ECOL6-VIGVGGGGGNAVEHMVR    | 1.115432 | 1.631    | 0.400791 | 0.852753 | 1.115432 | 1.631    | 0.400791 | 0.852753 | 1.115432 | 1.631    | 0.749085 | 0.852753 |
| sp A8A6H0 TNAE_ECOHS-ENAANIK              | 0.743829 | 0.9135   | 0.885653 | 0.686729 | 0.743829 | 0.714    | 0.885653 | 0.668442 | 0.946418 | 0.714    | 1.006763 | 0.484296 |
| sp P0A3B2 TYPA_ECO27-VEETEDADAFR          | 1.4022   | 1.80215  | 1.92406  | 2.369525 | 0.967193 | 1.3191   | 0.995086 | 2.59687  | 1.074309 | 1.3191   | 1.113522 | 1.83631  |
| sp P0A7V4 RS3_ECOL6-ADIDYNTSEAHTTYGVIGVK  | 0.475611 | 0.3303   | 0.130578 | 1.088688 | 0.48219  | 0.5108   | 0.153679 | 1.020268 | 0.92     | 0.5859   | 0.246623 | 0.53852  |
| sp B7M1N4 RL3_ECO8A-KVDVTGTSK             | 1.247085 | 2.985727 | 0.390944 | 0.979985 | 0.552779 | 3.6776   | 0.390944 | 1.2251   | 1.204457 | 0.8423   | 0.61518  | 0.917329 |
| sp A7ZUJ6 RL11_ECO24-AQLQEIAQTK           | 1.121604 | 0.92355  | 0.485222 | 2.870453 | 0.810385 | 1.09945  | 0.533957 | 0.660944 | 1.034469 | 0.9354   | 0.645296 | 1.045058 |
| sp P0AFF8 NUSA_ECO57-AMVVDQFR             | 5.048738 | 1.214167 | 1.195554 | 0.391124 | 5.048738 | 1.200338 | 1.195554 | 0.357802 | 3.940701 | 1.4584   | 0.60366  | 0.560891 |
| sp P06720 AGAL_ECOLI-NILGDVFHR            | 1.29764  | 1.93535  | 25.73748 | 0.297264 | 1.08892  | 1.758461 | 2.550183 | 0.776961 | 1.08892  | 1.544713 | 2.550183 | 0.776961 |
| sp P0AG32 RHO_ECO57-GNGSTEDLTAR           | 1.690082 | 2.3188   | 1.314865 | 1.494096 | 2.748647 | 2.14045  | 1.050138 | 1.875162 | 3.448864 | 2.3188   | 1.092402 | 0.99706  |
| sp P0A910 OMPA_ECOLI-AALIDCLAPDR          | 0.962165 | 1.063876 | 1.039578 | 0.55187  | 1.207312 | 0.969914 | 1.191884 | 0.385394 | 1.052462 | 0.9005   | 1.001033 | 0.479798 |
| sp B7M2A7 PROQ_ECO8A-AEQQAK               | 2.963892 | 0.59685  | 0.42204  | 0.264623 | 1.844953 | 0.8614   | 0.299693 | 0.265847 | 1.437762 | 0.8614   | 1.031087 | 0.466628 |
| sp P61517 CAN_ECOLI-LTGLEPGELFVHR         | 0.789987 | 0.9729   | 1.041891 | 1.123935 | 1.028226 | 0.73225  | 0.910246 | 0.933885 | 0.690991 | 0.81     | 0.910246 | 1.807336 |
| sp P00490 PHSM_ECOLI-VFLFGAK              | 1.200502 | 1.0029   | 1.75     | 0.210946 | 0.685218 | 0.83105  | 0.918033 | 0.177726 | 0.472074 | 0.6592   | 0.789646 | 0.134835 |
| sp P23847 DPPA_ECOLI-GYVVDPLGK            | 0.249764 | 0.966094 | 0.269912 | 0.936441 | 0.078403 | 0.811431 | 2.186984 | 0.943372 | 0.344907 | 0.833913 | 0.084333 | 0.752249 |
| sp Q1R626 RL18_ECOOUT-VQALADAAR           | 0.758549 | 1.446691 | 1.056089 | 0.967338 | 1.844592 | 1.41753  | 0.429834 | 1.622793 | 1.414835 | 1.4682   | 0.257333 | 1.510925 |
| sp P00968 CARB_ECOLI-EYEMEVVR             | 0.717868 | 0.732207 | 0.502095 | 0.765508 | 0.765906 | 0.7465   | 0.442821 | 0.949681 | 0.443116 | 0.6275   | 0.424964 | 0.814866 |
| sp A1AJD7 F16PA_ECOK1-VTPVGTPTVEEDFLQPGNK | 0.882186 | 2.5433   | 14.09682 | 1.267814 | 0.755264 | 2.15015  | 14.09682 | 1.267814 | 0.450613 | 1.7956   | 4.068341 | 0.958469 |
| sp P0AFG7 ODO2_ECO57-GLVTPVLR             | 1.952892 | 1.226303 | 0.363826 | 0.533793 | 1.037522 | 0.846015 | 0.412761 | 1.266619 | 0.900182 | 0.8684   | 0.296224 | 1.266619 |

|                                                  |          |          |          |          |          |         |          |          |          |         |          |          |
|--------------------------------------------------|----------|----------|----------|----------|----------|---------|----------|----------|----------|---------|----------|----------|
| sp A8A6H0 TNAE_ECOHS-NIFGYQYTIPTHQGR             | 0.321591 | 1.1862   | 3.34491  | 0.810258 | 1.01063  | 1.1862  | 1.51238  | 2.676453 | 0.980545 | 0.8043  | 1.382304 | 1.243165 |
| sp A7ZST1 PCKA_ECO24-YTDTPAGAALVAAGPK            | 0.502605 | 1.69655  | 0.413281 | 0.986217 | 1.242595 | 1.35915 | 0.22602  | 0.380737 | 1.924071 | 1.35915 | 0.856183 | 0.288744 |
| sp P0AA06 PHTP_ECO57-LMAELE                      | 0.707157 | 0.119    | 0.50139  | 0.285766 | 0.600592 | 0.8329  | 1.020632 | 0.310357 | 0.688652 | 0.3406  | 1.117181 | 0.453247 |
| sp A1AGI6 RPOA_ECOK1-VTLEPLER                    | 1.445899 | 0.90985  | 0.758148 | 0.538759 | 1.061048 | 0.6994  | 0.72091  | 0.543868 | 0.652503 | 0.89025 | 1.081282 | 0.837252 |
| sp B5Z3U4 TIG_ECO5E-EVIEFYSK                     | 0.573925 | 0.7383   | 0.351362 | 0.388641 | 1.033827 | 0.7383  | 0.26873  | 0.500072 | 1.044284 | 0.7383  | 0.329655 | 0.420075 |
| sp A1AC10 PURT_ECOK1-AFLGLPVGIR                  | 2.126189 | 1.8215   | 1.476424 | 0.793319 | 2.309998 | 1.8215  | 2.408548 | 1.673434 | 2.309998 | 1.8215  | 2.408548 | 1.673434 |
| sp A7ZNH9 YEEX_ECO24-EIQDVEK                     | 0.413098 | 2.14135  | 1.632585 | 1.243414 | 0.705839 | 1.0001  | 0.189302 | 1.009536 | 0.799635 | 1.0001  | 0.92845  | 0.617188 |
| sp A7ZUK1 RPOB_ECO24-SPGVFFDSK                   | 0.097053 | 1.155    | 0.244433 | 0.744934 | 0.037547 | 1.155   | 0.31101  | 1.671803 | 0.22471  | 0.99445 | 0.905129 | 1.355805 |
| sp P0AEQ3 GLNH_ECOLI-QFPNIDNAYMELGTNR            | 2.735823 | 0.817147 | 0.555233 | 0.826533 | 6.866581 | 0.8472  | 0.912038 | 1.093515 | 1.441985 | 0.60765 | 1.276305 | 0.76014  |
| sp P00509 AAT_ECOLI-GSALINDK                     | 2.508881 | 1.0766   | 0.554424 | 0.828127 | 1.49704  | 1.05485 | 0.729703 | 0.837797 | 1.104779 | 0.8735  | 0.706466 | 0.78056  |
| sp B7UJP9 YAJQ_ECO27-VQAQIQGDEIR                 | 2.267298 | 0.740396 | 0.230686 | 0.488613 | 2.187503 | 1.0024  | 0.213736 | 0.193841 | 2.026235 | 1.0596  | 0.185566 | 0.212866 |
| sp B7MZ75 ENO_ECO81-GMPLYEHIAELNGTPGK            | 0.859386 | 1.3648   | 0.88269  | 0.753226 | 0.836209 | 1.5868  | 1.030342 | 0.517131 | 0.896361 | 1.3648  | 1.012991 | 0.553087 |
| sp B5Z3U4 TIG_ECO5E-GLIEEMASAYEDPK               | 1.530538 | 1.402559 | 0.192494 | 0.799905 | 0.951471 | 1.66775 | 1.672019 | 1.044555 | 1.20074  | 2.2005  | 1.722165 | 0.645791 |
| sp P0AEY0 MALE_ECO57-QTVDEALK                    | 1.191255 | 0.501    | 0.525671 | 9.879285 | 1.397192 | 1.14935 | 0.570874 | 1.862451 | 1.19404  | 1.1946  | 0.556352 | 0.729071 |
| sp P27550 ACSA_ECOLI-<br>IAAGDTSNLGDTSTLADPGVVEK | 0.158398 | 0.7099   | 0.573845 | 8.42744  | 0.398061 | 0.7099  | 0.416955 | 1.643107 | 0.514657 | 0.7099  | 0.324212 | 1.631082 |
| sp P22188 MURE_ECOLI-DLLAPWVPDAPSR               | 1.100774 | 1.0326   | 2.596391 | 0.253464 | 1.064679 | 1.0326  | 2.125807 | 0.340865 | 0.90917  | 1.0326  | 1.84781  | 0.253464 |
| sp P09546 PUTA_ECOLI-GAYWDSEIK                   | 1.815457 | 0.4796   | 0.082252 | 1.621484 | 3.982487 | 0.46255 | 0.050375 | 2.121225 | 1.029152 | 0.5098  | 0.488726 | 1.921956 |
| sp P0A802 RPOZ_ECO57-VTVQDAVEK                   | 0.341079 | 1.0525   | 1.480987 | 0.338323 | 0.578856 | 1.1597  | 1.093735 | 0.538007 | 0.69172  | 1.0525  | 0.912895 | 0.447904 |

|                                     |          |          |          |          |          |          |          |          |          |         |          |          |
|-------------------------------------|----------|----------|----------|----------|----------|----------|----------|----------|----------|---------|----------|----------|
| sp B7MZ75 ENO_ECO81-DAGYTAVISHR     | 1.022354 | 0.786625 | 0.707475 | 1.422174 | 2.393588 | 1.3079   | 0.840009 | 0.901026 | 1.768365 | 0.3245  | 0.606827 | 3.561459 |
| sp P0AG68 RS1_ECOL6-DAIATVNK        | 1.56004  | 0.7762   | 0.622357 | 0.617218 | 2.029855 | 4.1464   | 2.037294 | 0.73628  | 1.940349 | 0.7762  | 3.332119 | 0.647428 |
| sp P0A7B0 IPYR_ECO57-MTDEAGEDAK     | 4.179837 | 2.80015  | 1.494869 | 0.999576 | 5.325177 | 2.7263   | 1.146503 | 0.975202 | 1.755212 | 2.2032  | 1.157704 | 0.870337 |
| sp B7MDM6 HSLO_ECO45-NNASPADPQVH    | 2.537157 | 3.71     | 0.617199 | 9.21534  | 2.537157 | 2.6008   | 0.970419 | 4.249607 | 0.920974 | 2.6008  | 0.633895 | 4.282824 |
| sp B7M1N4 RL3_ECO8A-GFAGTVK         | 3.53238  | 1.80575  | 2.925465 | 1.656087 | 2.535873 | 0.7977   | 9.689033 | 1.203097 | 2.954655 | 0.76155 | 4.14782  | 1.487299 |
| sp A7ZSJ0 RL15_ECO24-GFEGGQMPLYR    | 0.938263 | 1.1221   | 0.385361 | 1.860583 | 0.570615 | 1.3088   | 0.629508 | 1.860583 | 1.084053 | 1.21545 | 0.729798 | 1.351427 |
| sp A7ZV12 CH60_ECO24-AVTAAVEELK     | 5.417853 | 0.1897   | 1.009259 | 1.578947 | 2.349196 | 0.5834   | 2.006861 | 1.005624 | 0.854311 | 0.4434  | 2.046984 | 0.945448 |
| sp P0AG68 RS1_ECOL6-AVIESENSAER     | 4.477701 | 0.9522   | 1.003233 | 2.376475 | 1.990419 | 1.3721   | 1.059952 | 1.574357 | 2.619547 | 1.3721  | 1.257368 | 2.212604 |
| sp P37330 MASZ_ECOLI-GEQVIAWVR      | 0.820258 | 1.8191   | 4.148786 | 0.728278 | 0.992991 | 2.27095  | 2.985997 | 1.168732 | 0.940975 | 1.0655  | 1.642092 | 0.859933 |
| sp P07014 SDHB_ECOLI-FIGPAGLLAAYR   | 1.288124 | 1.037002 | 1.299285 | 0.146054 | 1.167425 | 0.868465 | 1.299285 | 0.146054 | 1.547938 | 1.12355 | 1.337539 | 0.093752 |
| sp P33602 NUOG_ECOLI-EGGIYTPALR     | 0.158988 | 1.0958   | 0.922446 | 1.81921  | 0.156559 | 1.0958   | 0.91482  | 2.018361 | 0.361758 | 0.7582  | 2.507289 | 3.604086 |
| sp P69828 PTKA_ECOLI-SEVLTHIGNEMLAK | 0.592906 | 0.8076   | 0.442433 | 0.611977 | 1.200122 | 0.8076   | 1.218335 | 0.820982 | 1.100518 | 0.8076  | 1.218335 | 1.727912 |
| sp A7ZSJ0 RL15_ECO24-GIGSGLGK       | 1.574929 | 0.59325  | 7.460589 | 2.521969 | 2.871904 | 0.2187   | 9.617402 | 1.638544 | 1.41128  | 0.7617  | 5.188611 | 1.585477 |
| sp P0AF93 RIDA_ECOLI-VGDIVK         | 1.68994  | 0.92725  | 2.16849  | 0.39805  | 1.006279 | 0.8987   | 1.548439 | 2.136293 | 1.000759 | 0.92725 | 0.593289 | 2.136293 |
| sp P36683 ACNB_ECOLI-MQPGITLR       | 0.735198 | 0.7291   | 1.081464 | 1.058931 | 1.006151 | 0.7616   | 1.10621  | 1.426355 | 1.006151 | 0.7042  | 1.061439 | 0.298414 |
| sp P0ADZ7 YAJC_ECOLI-GDEVLTNGGLVGR  | 0.988841 | 1.104776 | 0.497968 | 2.749767 | 1.030961 | 0.851319 | 0.411089 | 2.678652 | 0.390572 | 1.1526  | 0.724419 | 2.678652 |
| sp P0AEQ3 GLNH_ECOLI-AIDFSDGYK      | 0.477147 | 0.65665  | 3.488465 | 1.382962 | 1.633961 | 1.12095  | 0.845497 | 2.650804 | 2.611719 | 0.78405 | 1.12977  | 1.854056 |
| sp A7ZPA8 YFBU_ECO24-LQTIIR         | 0.997637 | 1.93395  | 0.988787 | 0.665451 | 0.767254 | 1.9219   | 0.918244 | 0.50044  | 0.627436 | 1.9219  | 0.903994 | 0.166852 |
| sp A7ZSL4 EFTU1_ECO24-AGENVGVLLR    | 0.915184 | 1.624353 | 0.657417 | 1.686541 | 0.762557 | 1.4431   | 0.561945 | 2.285303 | 0.456495 | 1.0603  | 0.450732 | 2.868497 |

|                                                 |          |          |          |          |          |         |          |          |          |          |          |          |
|-------------------------------------------------|----------|----------|----------|----------|----------|---------|----------|----------|----------|----------|----------|----------|
| sp A8A5E7 EFG_ECOHS-GYEFINDIK                   | 0.320091 | 1.3507   | 1.466098 | 0.574547 | 0.669093 | 1.3507  | 1.413409 | 0.49431  | 0.795317 | 0.721    | 1.409084 | 0.644162 |
| sp P0A913 PAL_ECO57-GTPEYNISLGER                | 0.660586 | 0.6741   | 26.41056 | 1.112831 | 1.134228 | 0.3027  | 26.41056 | 1.249738 | 0.906797 | 0.71375  | 2.113118 | 1.128654 |
| sp A7ZV73 RS18_ECO24-FTAEGVQEIDYK               | 0.424039 | 0.3825   | 1.688316 | 0.314004 | 0.516401 | 0.3842  | 1.293801 | 0.314004 | 0.527756 | 0.7188   | 1.580248 | 0.201332 |
| sp P0C0L2 OSMC_ECOLI-SEVAVPGIDASTFDGIIQK        | 1.895223 | 2.91315  | 0.876758 | 0.56708  | 0.776319 | 2.8422  | 0.877896 | 0.576705 | 1.060746 | 2.35935  | 0.829617 | 0.441411 |
| sp A8A6H0 TNAA_ECOHS-FAENAYFIK                  | 0.231897 | 0.7192   | 0.599283 | 1.043699 | 0.267366 | 0.6431  | 1.243339 | 1.043699 | 0.57927  | 0.53095  | 0.518534 | 1.2664   |
| sp B1IU2 SYA_ECOLC-LSGDTLDGETAFR                | 1.30991  | 1.599311 | 1.612877 | 1.482775 | 1.713684 | 1.097   | 2.27348  | 1.590782 | 1.376793 | 0.8105   | 0.784254 | 1.761088 |
| sp A7ZNR4 GATZ_ECO24-SVELVK                     | 1.726453 | 0.7865   | 0.035155 | 0.992271 | 2.031924 | 0.7865  | 0.226103 | 0.248425 | 2.052198 | 0.7865   | 0.570664 | 0.405502 |
| sp P0ABU5 ELBB_ECOLI-VLVLAE                     | 0.445245 | 1.1786   | 0.938699 | 0.366112 | 0.546754 | 0.38035 | 1.309528 | 0.247145 | 0.405828 | 0.38035  | 0.938699 | 0.200939 |
| sp A1A7M1 BAMA_ECOK1-VNVDAGNR                   | 0.741466 | 0.761011 | 1.133291 | 2.438249 | 0.755048 | 0.68069 | 1.0305   | 1.858017 | 0.719158 | 0.821033 | 1.244719 | 1.453032 |
| sp P0AEZ3 MIND_ECOLI-ILGILASK                   | 1.439664 | 0.5277   | 0.88288  | 0.32163  | 2.059421 | 0.5277  | 0.851584 | 0.32163  | 1.800543 | 0.5235   | 1.066738 | 0.439993 |
| sp B7LA23 GLPK_ECO55-EMLPEVR                    | 0.731445 | 1.81995  | 0.687826 | 2.307368 | 0.759958 | 0.82925 | 0.790357 | 1.655403 | 1.103489 | 0.82925  | 0.854837 | 1.931251 |
| sp P76251 DMLA_ECOLI-ENTEGEYSSLGGR              | 1.320912 | 0.8222   | 1.310892 | 0.627119 | 2.039024 | 0.7728  | 0.981217 | 0.923789 | 1.865112 | 0.956    | 0.939962 | 0.796937 |
| sp A1AGI5 RL17_ECOK1-LFNELGPR                   | 0.745728 | 2.3022   | 0.631086 | 1.165415 | 1.010159 | 2.1336  | 0.864665 | 1.271407 | 0.730375 | 0.9681   | 0.930781 | 1.269007 |
| sp P62593 BLAT_ECOLX-DTTMPAAMATTLR              | 1.331245 | 1.5293   | 0.353257 | 0.340006 | 1.293088 | 1.37415 | 0.902099 | 0.727416 | 1.761085 | 1.4586   | 1.201141 | 0.732316 |
| sp A7ZV12 CH60_ECO24-<br>NDAADLGAAGGMGGMGGMGGMM | 1.453004 | 1.8102   | 0.930435 | 1.263269 | 1.410216 | 1.76195 | 0.877883 | 1.333908 | 1.445463 | 1.6137   | 0.869015 | 1.203002 |
| sp P0AE10 AHPC_ECO57-DASDLLR                    | 0.355329 | 1.38315  | 2.115054 | 2.360692 | 0.857821 | 1.1039  | 3.304    | 1.994511 | 1.675442 | 0.7035   | 3.52     | 1.015684 |
| sp B7NF50 ATPA_ECOLU-GILDSFK                    | 1.331725 | 0.5088   | 0.689755 | 1.362772 | 1.235294 | 0.4544  | 0.432474 | 1.418142 | 1.041157 | 0.5088   | 0.592668 | 2.555754 |
| sp P0A7W0 RS4_ECO57-LDNVVYR                     | 0.255672 | 0.66185  | 0.716705 | 2.452682 | 0.201657 | 0.9996  | 1.104786 | 3.720117 | 0.210684 | 0.9996   | 1.015864 | 2.102414 |

|                                            |          |          |          |          |          |          |          |          |          |         |          |          |
|--------------------------------------------|----------|----------|----------|----------|----------|----------|----------|----------|----------|---------|----------|----------|
| sp P0ACF1 DBHA_ECOL6-TQLIDVIAEK            | 0.04929  | 0.2859   | 0.646118 | 1.900477 | 1.141649 | 1.0627   | 0.867125 | 0.753262 | 1.191756 | 1.00495 | 0.687093 | 1.200603 |
| sp P0A9L3 FKBB_ECOLI-HPAVPVDVVHR           | 0.209468 | 0.712536 | 8.52163  | 0.511567 | 0.252607 | 0.7611   | 9.845859 | 0.82537  | 0.238783 | 0.7611  | 1.964588 | 0.644111 |
| sp B1LL63 ATPF_ECOSM-LVAEL                 | 3.896611 | 0.3846   | 0.496031 | 4.061508 | 4.443448 | 0.213    | 1.33302  | 3.006114 | 3.896611 | 0.213   | 0.095291 | 2.738001 |
| sp P63285 CLPB_ECO57-AELEQAK               | 1.423552 | 1.09105  | 3.085021 | 1.800354 | 0.295519 | 0.3351   | 2.677765 | 1.933489 | 0.30728  | 0.55495 | 1.277126 | 1.194666 |
| sp P33599 NUOCD_ECOLI-EQLLEVGDFLK          | 1.754424 | 0.7642   | 1.86478  | 1.87035  | 1.74715  | 0.7714   | 1.692854 | 1.663295 | 1.130131 | 0.7278  | 1.69923  | 1.618334 |
| sp P25553 ALDA_ECOLI-IVDEIGLPR             | 0.402479 | 3.493693 | 1.563659 | 0.934624 | 0.243884 | 4.4297   | 8.439752 | 1.215943 | 0.386359 | 3.39255 | 8.439752 | 2.358408 |
| sp P06959 ODP2_ECOLI-AVAAALEQMPR           | 1.860369 | 2.4593   | 0.504875 | 3.733092 | 1.860369 | 2.4593   | 0.421995 | 3.677371 | 3.438551 | 1.70615 | 0.627941 | 1.699912 |
| sp P0AFG9 ODP1_ECO57-LVPIIADEAR            | 4.024331 | 0.91395  | 1.117016 | 0.189505 | 3.273726 | 0.8887   | 0.766933 | 0.26237  | 2.784289 | 0.8887  | 0.910922 | 0.26237  |
| sp P0AFG7 ODO2_ECO57-LLLDV                 | 1.208319 | 0.5072   | 1.772232 | 0.292461 | 0.893768 | 0.5072   | 1.422091 | 0.170398 | 0.541797 | 0.6399  | 0.701384 | 0.619203 |
| sp P0AFG7 ODO2_ECO57-ESAPAAAAPAAQPALAAR    | 1.783362 | 0.9421   | 0.88718  | 1.320694 | 1.85647  | 1.07155  | 1.050225 | 1.433326 | 1.81737  | 1.0842  | 1.108033 | 1.361288 |
| sp P63285 CLPB_ECO57-LEVNEDR               | 1.845355 | 0.2002   | 0.231319 | 2.053834 | 1.38179  | 0.2078   | 0.231319 | 2.549571 | 1.339026 | 0.2154  | 0.651157 | 2.174795 |
| sp P0AG68 RS1_ECOL6-FTGVDR                 | 1.597948 | 0.947916 | 0.396022 | 0.369026 | 1.426868 | 0.725992 | 0.521462 | 0.37727  | 1.426868 | 1.25478 | 0.519479 | 0.37727  |
| sp A7ZSD0 MDH_ECO24-AGVYDK                 | 0.197517 | 1.1445   | 8.959847 | 0.879613 | 0.515354 | 1.1445   | 17.67328 | 0.837818 | 0.520505 | 0.6218  | 4.169199 | 0.5142   |
| sp B7M1N3 RL4_ECO8A-VVMTADAVK              | 0.558732 | 0.8391   | 0.783478 | 0.753917 | 2.001962 | 0.9469   | 3.125978 | 0.866613 | 1.674657 | 1.3395  | 2.9375   | 0.798583 |
| sp P15254 PUR4_ECOLI-GNNALGATALAQVYR       | 5.169847 | 1.583482 | 1.19341  | 0.69661  | 7.40592  | 2.1144   | 1.845867 | 0.757538 | 7.40592  | 2.1144  | 1.126537 | 0.770874 |
| sp B1IQV7 PNP_ECOLC-IAATDGEK               | 1.876768 | 1.05325  | 2.643476 | 1.719808 | 1.08439  | 1.05325  | 1.485376 | 0.52698  | 1.08439  | 1.1846  | 0.91173  | 1.17262  |
| sp P0A6Z5 HTPG_ECO57-FASTHTDSSAQTVSLEDYVSR | 1.123795 | 0.8469   | 1.689398 | 0.867388 | 0.842063 | 0.9343   | 2.188073 | 0.76915  | 0.842063 | 0.9343  | 2.188073 | 0.845968 |
| sp P0AE10 AHPC_ECO57-EGEATLAPSLDLVGK       | 1.585187 | 1.00315  | 0.709849 | 1.479726 | 1.61092  | 1.1177   | 0.850946 | 0.717527 | 1.61636  | 1.0299  | 0.900037 | 0.755328 |
| sp P0A6Z5 HTPG_ECO57-SFLESLSGSDQAK         | 0.747371 | 2.64315  | 0.600321 | 0.309593 | 1.257611 | 2.5504   | 0.760632 | 0.172296 | 1.453348 | 2.4969  | 0.788283 | 0.148157 |



|                                      |          |          |          |          |          |          |          |          |          |         |          |          |
|--------------------------------------|----------|----------|----------|----------|----------|----------|----------|----------|----------|---------|----------|----------|
| sp A7ZUM3 PUR9_ECO24-GSSMASDAFFPFR   | 0.792532 | 2.278    | 0.888751 | 2.544926 | 0.741795 | 2.278    | 0.585326 | 0.387659 | 0.831861 | 3.8199  | 0.863568 | 0.387659 |
| sp P0A3B2 TYPA_ECO27-VMDSNDLEK       | 0.756927 | 1.24135  | 1.120349 | 1.041002 | 0.625629 | 1.24135  | 1.120349 | 1.041002 | 0.434171 | 1.1719  | 1.120349 | 1.041002 |
| sp A8A6H0 TNAE_ECOHS-DDSFFDVYTECR    | 1.58625  | 0.685    | 0.758285 | 1.349223 | 1.47396  | 0.8843   | 0.223388 | 0.829524 | 1.515136 | 0.93685 | 0.223388 | 0.829524 |
| sp P23843 OPPA_ECOLI-DWVVNER         | 0.775985 | 0.852887 | 2.570978 | 35.36735 | 0.995894 | 1.1381   | 6.337162 | 8.394702 | 1.163375 | 0.91545 | 3.572832 | 6.620015 |
| sp A8A439 YGFZ_ECOHS-EGATTLLWFEHPAER | 1.113473 | 1.421303 | 1.440268 | 2.832602 | 0.831551 | 0.9547   | 1.021372 | 2.351307 | 0.817481 | 1.4232  | 0.674513 | 3.061181 |
| sp P02925 RBSB_ECOLI-FNVLASQPADFDR   | 0.382709 | 0.42615  | 2.034258 | 2.110568 | 0.382709 | 0.42615  | 1.40428  | 2.862696 | 0.654021 | 0.65435 | 1.40428  | 2.043757 |
| sp P0AFG7 ODO2_ECO57-AVVEALK         | 2.44328  | 1.325186 | 0.550852 | 9.993421 | 1.200749 | 0.87795  | 0.355532 | 0.913533 | 0.436104 | 0.87795 | 0.371017 | 0.981774 |
| sp B7M1N4 RL3_ECO8A-GLWEFR           | 0.965443 | 2.5143   | 1.561988 | 1.24013  | 1.757146 | 2.5143   | 0.757698 | 1.043304 | 0.986639 | 0.70625 | 0.757698 | 1.218063 |
| sp A8A4Y4 IF2_ECOHS-TSLLDYIR         | 1.657787 | 3.656969 | 0.468726 | 5.20031  | 2.942619 | 5.16585  | 0.13684  | 6.064133 | 1.385754 | 5.16585 | 0.13684  | 4.112812 |
| sp P15288 PEPD_ECOLI-FLAGHAEELDLR    | 0.720314 | 2.6646   | 0.974976 | 5.786626 | 2.196934 | 1.59165  | 0.953944 | 0.915431 | 2.448801 | 0.98585 | 1.180253 | 1.166012 |
| sp A7ZJA8 SUCC_ECO24-LEGNNAELGAK     | 1.438208 | 1.3815   | 0.5      | 1.294747 | 2.137827 | 1.3815   | 0.616376 | 1.162036 | 1.931629 | 1.3815  | 1.289043 | 0.711209 |
| sp P0A8N4 SYK1_ECOL6-EQGIAFPNDFR     | 2.085229 | 0.7997   | 1.10592  | 1.527032 | 1.944608 | 0.7997   | 1.32801  | 1.55566  | 1.74773  | 0.7997  | 1.991623 | 1.615693 |
| sp A7ZJ31 SYL_ECO24-GEGDIDNAPWPVADEK | 2.061599 | 0.4965   | 0.925974 | 1.474165 | 2.312555 | 1.1772   | 1.138511 | 0.995582 | 1.952818 | 1.8579  | 1.138511 | 1.173669 |
| sp B7MGS0 DPS_ECO45-YAIVANDVR        | 2.041906 | 0.709376 | 1.437295 | 0.196734 | 6.112652 | 0.928    | 1.411338 | 0.212556 | 4.441941 | 0.928   | 0.978292 | 0.212556 |
| sp P27302 TKT1_ECOLI-AYPQEADEFTR     | 1.856872 | 0.88875  | 1.109076 | 0.462162 | 1.803241 | 0.85795  | 1.085505 | 0.403616 | 1.6777   | 0.85795 | 1.07107  | 0.403616 |
| sp A7ZV12 CH60_ECO24-VAQIR           | 1.334382 | 3.3907   | 0.802129 | 1.195968 | 0.74065  | 3.3907   | 0.695742 | 1.195968 | 1.557548 | 0.5501  | 0.343782 | 0.642693 |
| sp B5Z3U4 TIG_ECO5E-EKDGAVEAEDR      | 2.720464 | 1.443694 | 1.034943 | 0.850855 | 3.146017 | 0.940796 | 0.552981 | 1.198196 | 6.491188 | 1.0379  | 0.763196 | 2.493795 |
| sp P0A9C6 GLN1B_ECOL6-IPVVSSPK       | 0.63261  | 0.583981 | 0.411736 | 0.824345 | 0.59673  | 0.4689   | 1.084318 | 0.515546 | 0.739243 | 0.4689  | 0.539283 | 0.747158 |
| sp B7M1N3 RL4_ECO8A-FSVEAPK          | 0.724686 | 0.496063 | 0.266069 | 0.381893 | 0.898137 | 0.636638 | 0.321769 | 1.077768 | 1.355264 | 0.1741  | 0.324919 | 1.331337 |

|                                      |          |          |          |          |          |          |          |          |          |         |          |          |
|--------------------------------------|----------|----------|----------|----------|----------|----------|----------|----------|----------|---------|----------|----------|
| sp Q1R615 RL29_ECOOUT-MQAASGQLQSHLLK | 0.912426 | 1.216    | 1.300337 | 0.432675 | 1.490707 | 0.9029   | 1.184521 | 0.627456 | 1.569563 | 0.7823  | 1.506243 | 0.481319 |
| sp P27550 ACSA_ECOLI-LVITSDEGVR      | 1.578825 | 0.86535  | 1.209493 | 0.535931 | 2.757804 | 0.86535  | 1.076807 | 0.897221 | 2.757804 | 0.86535 | 1.258757 | 0.766322 |
| sp P0AC70 GLRX4_ECOL6-GELQQLIK       | 5.114059 | 0.6086   | 31.56733 | 1.063986 | 7.222541 | 0.6086   | 31.56733 | 1.063986 | 6.368941 | 0.6086  | 0.349209 | 1.386545 |
| sp P0ADX2 YHFA_ECOL6-AVNITHSYEVVAA   | 1.98151  | 1.310233 | 1.069524 | 3.678485 | 2.084324 | 1.09265  | 1.781913 | 1.370046 | 0.730374 | 1.1922  | 1.547074 | 1.370046 |
| sp A1A7M9 ACCA_ECOK1-APLAAEAMGIIAPR  | 2.612527 | 0.57     | 0.589506 | 0.13849  | 1.959501 | 0.7505   | 0.940299 | 0.113541 | 1.049159 | 0.7505  | 0.630978 | 0.113541 |
| sp B7MZ75 ENO_ECO81-GIANSILIK        | 0.844634 | 0.2413   | 0.253435 | 0.246608 | 0.855682 | 0.2413   | 0.216047 | 0.255392 | 1.89373  | 0.26215 | 0.167086 | 0.432375 |
| sp A7ZPU2 PUR5_ECO24-DAGVDIDAGNALVGR | 0.593854 | 0.699392 | 0.18512  | 17.44209 | 1.835165 | 0.7566   | 0.475426 | 14.96837 | 1.21875  | 0.74075 | 0.755141 | 8.229385 |
| sp P63285 CLPB_ECO57-LDPVIGR         | 0.722404 | 1.39835  | 2.151756 | 0.422527 | 1.139146 | 1.5982   | 2.236802 | 0.422527 | 1.227926 | 1.5982  | 1.05809  | 0.587425 |
| sp A7ZSJ0 RL15_ECO24-AAITAIEVR       | 0.362511 | 1.199414 | 0.914247 | 1.308185 | 0.684317 | 0.53655  | 0.712701 | 1.442977 | 0.7722   | 0.6341  | 0.572485 | 1.520097 |
| sp B1LL63 ATPF_ECOSM-SQILDEAK        | 0.526784 | 1.0393   | 2.433905 | 0.858057 | 0.396921 | 1.1641   | 1.815862 | 0.736567 | 1.028551 | 1.2983  | 1.415161 | 0.453401 |
| sp P77395 CNOX_ECOLI-TIPLQDQDTR      | 3.08038  | 1.6543   | 0.655055 | 1.708742 | 2.46455  | 1.6208   | 0.820878 | 1.833606 | 2.529116 | 1.6035  | 0.940323 | 1.697979 |
| sp Q0TCG3 RS13_ECOL5-AILAAAGIAEDVK   | 0.313722 | 0.457209 | 6.045341 | 0.289157 | 0.315459 | 0.57945  | 12.03392 | 0.090406 | 0.301053 | 0.3822  | 1.93293  | 0.356363 |
| sp A7ZUH8 ARLY_ECO24-NPDALELIR       | 1.221567 | 0.4031   | 5.426805 | 0.127112 | 1.14266  | 0.4031   | 5.426805 | 0.158094 | 1.696721 | 0.5318  | 3.702023 | 0.255604 |
| sp P0ABH7 CISY_ECOLI-GTLGQDVIDIR     | 1.887025 | 3.02965  | 1.374396 | 1.359557 | 1.420267 | 1.5513   | 2.532627 | 1.810412 | 1.628784 | 1.5513  | 2.004012 | 1.76366  |
| sp A7ZUJ6 RL11_ECO24-AADMTGADIEAMTR  | 1.226922 | 1.4558   | 2.79349  | 1.568591 | 1.653571 | 1.0205   | 2.79349  | 1.546874 | 1.412759 | 0.9455  | 1.518309 | 1.034285 |
| sp Q0TCG3 RS13_ECOL5-ISELSEGQIDTLR   | 1.378165 | 0.8266   | 0.558031 | 1.213646 | 1.209403 | 1.6102   | 0.434027 | 0.295297 | 1.090718 | 1.6102  | 0.434027 | 0.855794 |
| sp B1IT06 RS6_ECOLC-YTAAITGAEGK      | 0.387382 | 1.4535   | 1.770075 | 0.766568 | 0.637236 | 1.4033   | 1.770075 | 0.797601 | 0.733518 | 1.5023  | 1.775939 | 0.604507 |
| sp P25553 ALDA_ECOLI-AIDAAER         | 0.964294 | 1.48395  | 0.707085 | 2.344117 | 1.232062 | 1.407216 | 0.836117 | 1.958784 | 3.278726 | 1.8822  | 1.080723 | 1.958784 |
| sp C4ZPU9 RS20_ECOBW-GLIHK           | 0.949583 | 0.37015  | 0.527637 | 7.561563 | 1.386078 | 0.5161   | 0.26583  | 6.914546 | 1.384189 | 0.5161  | 0.475246 | 3.455181 |

|                                          |          |          |          |          |          |          |          |          |          |          |          |          |
|------------------------------------------|----------|----------|----------|----------|----------|----------|----------|----------|----------|----------|----------|----------|
| sp K0BE10 TAL_ECO1E-LSYTGEVK             | 0.246266 | 1.061205 | 1.990943 | 1.067775 | 0.331238 | 0.90797  | 2.356114 | 0.782129 | 0.268281 | 0.955401 | 0.948616 | 0.972595 |
| sp P0AFG7 ODO2_ECO57-QYGAEFEK            | 1.069933 | 1.5967   | 4.247405 | 0.743153 | 1.145354 | 1.1304   | 3.610171 | 0.696959 | 2.033631 | 1.10495  | 3.139199 | 0.770015 |
| sp A7ZJZ6 SERC_ECO24-VTVDGLR             | 0.912178 | 0.514526 | 1.856295 | 0.380986 | 0.923662 | 0.1616   | 1.30943  | 0.410186 | 1.070971 | 0.6352   | 1.554745 | 0.372338 |
| sp B7NF50 ATPA_ECOLU-TALAIIDAIINQR       | 2.082428 | 3.2971   | 1.734078 | 15.57228 | 1.376744 | 3.0509   | 1.514    | 3.528728 | 1.144732 | 2.9793   | 3.587868 | 3.64916  |
| sp A7ZUD3 TPIS_ECO24-ADAFVIVK            | 1.511746 | 0.27425  | 3.688343 | 4.136967 | 1.511746 | 0.2824   | 0.591604 | 3.141764 | 3.95775  | 0.2824   | 0.543447 | 1.696979 |
| sp A7ZTU5 ATPG_ECO24-VMLQAYDEGR          | 0.784834 | 0.2349   | 2.164054 | 0.125093 | 1.272275 | 0.8036   | 2.057648 | 0.355028 | 0.907577 | 1.0977   | 1.608612 | 0.659527 |
| sp P08200 IDH_ECOLI-VVDAAVEK             | 0.539652 | 0.5674   | 2.372255 | 0.647866 | 1.752334 | 0.43645  | 3.832305 | 1.187119 | 1.402353 | 0.50715  | 4.971329 | 1.286136 |
| sp A7ZUD3 TPIS_ECO24-SATPAQAQAVHK        | 0.633905 | 0.3804   | 0.953438 | 0.582957 | 0.966992 | 0.63495  | 0.869802 | 0.61658  | 0.656905 | 0.8046   | 0.700336 | 0.599769 |
| sp B7M1N3 RL4_ECO8A-QVEEMLA              | 2.621032 | 1.1222   | 3.864462 | 1.790433 | 1.386014 | 1.1222   | 1.300149 | 1.790433 | 0.704376 | 0.8714   | 1.380111 | 1.350413 |
| sp P04825 AMPN_ECOLI-GLNIFNSK            | 1.019133 | 1.3647   | 0.795755 | 0.115695 | 1.028274 | 1.4109   | 0.657268 | 0.115695 | 0.868778 | 1.46295  | 1.054039 | 0.434504 |
| sp P0AEQ3 GLNH_ECOLI-WFGTEPK             | 2.001295 | 0.71095  | 12.1467  | 0.607568 | 1.591524 | 0.9484   | 1.154329 | 0.758322 | 1.355888 | 1.2407   | 1.372673 | 0.783974 |
| sp P0AAI6 FABF_ECOL6-ASTPLGVGGFGAAR      | 1.32841  | 1.5792   | 0.056673 | 2.059613 | 1.469128 | 1.5792   | 0.056673 | 1.779492 | 1.392844 | 1.18825  | 1.99184  | 1.408767 |
| sp P0A9R0 DHAS_ECO57-GQAETNK             | 2.614543 | 0.6378   | 0.146222 | 5.480703 | 2.636595 | 0.65625  | 0.339971 | 1.518908 | 3.825927 | 0.6378   | 0.489012 | 1.747472 |
| sp P68206 YJBJ_ECOLI-EVVDWETR            | 1.706338 | 0.8577   | 0.208053 | 4.636827 | 0.854233 | 0.8608   | 0.290174 | 2.021334 | 0.955042 | 0.8639   | 0.290174 | 3.102208 |
| sp P63285 CLPB_ECO57-MMESER              | 0.630935 | 1.146651 | 0.788271 | 1.761023 | 0.551282 | 1.170327 | 1.004241 | 3.012591 | 0.887485 | 1.2892   | 1.473874 | 1.095888 |
| sp P0A6Y9 DNAK_ECOL6-FEELVQTR            | 0.688413 | 1.48085  | 1.477304 | 0.210233 | 0.704161 | 2.2544   | 1.181728 | 4.481823 | 0.704161 | 2.2544   | 1.181728 | 4.649434 |
| sp B7NF50 ATPA_ECOLU-AVDSMPIGR           | 0.419311 | 2.113129 | 1.127995 | 2.745342 | 0.682249 | 2.4919   | 0.878258 | 2.895341 | 0.962167 | 2.41515  | 0.836686 | 1.745045 |
| sp Q1R6A9 RL13_ECOOUT-VYAGNEHNHAAQPPQLDI | 1.485529 | 0.9605   | 0.879989 | 0.784016 | 0.917443 | 0.9308   | 0.803697 | 0.822573 | 0.826754 | 0.9308   | 1.000332 | 0.932961 |
| sp P0A9A0 FTNA_ECO57-SGEGLYFIDK          | 1.104006 | 1.118996 | 1.136679 | 1.089377 | 0.839914 | 0.881684 | 1.136679 | 0.179306 | 0.964504 | 0.8788   | 0.95574  | 0.764903 |

|                                        |          |          |          |          |          |          |          |          |          |          |          |          |
|----------------------------------------|----------|----------|----------|----------|----------|----------|----------|----------|----------|----------|----------|----------|
| sp B7UIL4 RS2_ECO27-ILFVGTK            | 0.057067 | 0.5874   | 1.711879 | 1.131247 | 0.548373 | 0.6895   | 1.228779 | 0.557455 | 0.36176  | 0.6895   | 0.806712 | 0.55085  |
| sp B7NF50 ATPA_ECOLU-EAFPGDVFYLHSR     | 0.299732 | 0.3791   | 0.219106 | 0.729444 | 0.314585 | 0.39965  | 0.574418 | 0.550248 | 0.267738 | 0.39965  | 0.577334 | 0.871325 |
| sp P10384 FADL_ECOLI-AYSGEGAIADDAGNVSR | 0.344487 | 0.934    | 0.46887  | 1.379125 | 0.344487 | 0.934    | 0.613071 | 3.628054 | 0.714851 | 0.934    | 0.693266 | 1.208044 |
| sp P00968 CARB_ECOLI-IGLETAR           | 1.234202 | 0.749875 | 12.87325 | 3.093226 | 1.855522 | 0.935173 | 13.18962 | 2.07535  | 0.691571 | 1.068889 | 13.18962 | 2.189855 |
| sp A7ZTU4 ATPB_ECO24-VSLVYQMNPPGNR     | 1.815311 | 2.539104 | 0.877246 | 1.681552 | 1.179536 | 4.9409   | 0.512972 | 1.261388 | 0.549418 | 1.9272   | 1.582272 | 1.118985 |
| sp B7NF50 ATPA_ECOLU-MQLNSTEISELIK     | 1.91229  | 0.9617   | 4.368895 | 0.536154 | 2.857283 | 1.8247   | 3.413197 | 0.428029 | 2.058478 | 1.8247   | 1.379273 | 0.612095 |
| sp B5Z0E9 EFTS_ECO5E-ITDVEVLK          | 1.015204 | 0.6758   | 1.380501 | 0.673029 | 0.933073 | 0.8634   | 1.263093 | 0.673288 | 0.866458 | 0.83295  | 1.545128 | 0.685339 |
| sp P0A9S3 GATD_ECOLI-VAESVIPEIK        | 2.455262 | 0.63585  | 0.65956  | 0.253859 | 3.592081 | 0.5734   | 0.65956  | 0.286782 | 3.711945 | 1.0201   | 0.694807 | 1.431452 |
| sp P0AA06 PTHP_ECO57-AVEHLVK           | 1.026693 | 0.4664   | 10.93086 | 2.401888 | 7.953136 | 0.4664   | 6.158249 | 1.208191 | 1.05833  | 0.5955   | 2.052452 | 1.013156 |
| sp P0AE10 AHPC_ECO57-AWHSSETIAK        | 2.402305 | 1.1007   | 0.5844   | 0.628794 | 1.746581 | 1.31045  | 0.497821 | 0.919002 | 1.704076 | 1.1007   | 0.565535 | 0.722284 |
| sp B7MGS0 DPS_ECO45-TALIDHLDTMAER      | 1.303987 | 1.27465  | 1.165137 | 9.505668 | 1.265532 | 1.27465  | 1.059419 | 1.957849 | 1.342443 | 1.3109   | 1.143355 | 2.063433 |
| sp P0A3B2 TYPA_ECO27-ELVHNVALR         | 1.434744 | 1.343521 | 0.860397 | 0.279867 | 1.29857  | 0.879443 | 1.617733 | 0.265951 | 1.256394 | 0.906986 | 1.200846 | 0.229196 |
| sp B7MIX0 RL1_ECO45-ELATAK             | 2.311461 | 0.60225  | 0.984365 | 1.46778  | 1.534933 | 0.60225  | 1.186464 | 2.494046 | 0.555093 | 0.4619   | 0.850616 | 2.809073 |
| sp B1LNK7 GLYA_ECOSM-TYQQQVAK          | 0.506162 | 1.0979   | 1.376137 | 0.190428 | 0.556994 | 1.01895  | 0.989422 | 0.179317 | 0.319497 | 1.01895  | 3.059562 | 0.454829 |
| sp P15288 PEPD_ECOLI-DPIQPYIDGEWVK     | 0.937577 | 0.6989   | 6.043105 | 0.398012 | 1.108378 | 0.8296   | 8.893487 | 0.606883 | 1.138114 | 0.95625  | 5.034209 | 0.648701 |
| sp B7MIU7 RS16_ECO45-MVTIR             | 0.401977 | 1.380101 | 0.567225 | 0.222455 | 0.401977 | 1.23355  | 0.592752 | 0.223326 | 0.469694 | 1.8775   | 0.36006  | 0.367152 |
| sp P0A956 ALKH_ECOL6-EAVEGAK           | 2.761077 | 3.5823   | 0.495074 | 2.066221 | 1.571128 | 1.3595   | 0.745056 | 0.644744 | 1.779564 | 0.9894   | 0.577456 | 0.6842   |
| sp P37330 MASZ_ECOLI-VPDIHNVALMEDR     | 0.669841 | 0.76383  | 0.457475 | 3.007561 | 0.6783   | 0.9368   | 0.634841 | 2.221352 | 0.832575 | 0.9368   | 0.759367 | 3.221588 |
| sp B7MIX0 RL1_ECO45-VVQQLGQVLGPR       | 0.462315 | 1.31805  | 0.767479 | 1.327969 | 0.486826 | 1.6485   | 0.438184 | 0.621132 | 0.388314 | 1.31805  | 0.447186 | 0.730647 |

|                                         |          |          |          |          |          |          |          |          |          |          |          |          |
|-----------------------------------------|----------|----------|----------|----------|----------|----------|----------|----------|----------|----------|----------|----------|
| sp B5Z3U4 TIG_ECO5E-MIPGFEDGIK          | 5.026076 | 1.0106   | 0.632756 | 2.636516 | 0.339605 | 1.0106   | 1.385399 | 2.500822 | 0.370522 | 0.86535  | 0.9269   | 1.922956 |
| sp B7UK34 RL14_ECO27-IFGPVTR            | 1.371797 | 0.950232 | 0.352289 | 0.426098 | 2.981643 | 0.9138   | 0.263091 | 0.350876 | 2.981643 | 0.9138   | 0.247876 | 0.455662 |
| sp B5Z0E9 EFTS_ECO5E-VAALEGDVLGSIYQHGAR | 6.459084 | 1.3348   | 0.33583  | 1.519364 | 5.673577 | 1.3428   | 0.385672 | 1.519364 | 3.217105 | 1.3348   | 0.454478 | 0.983776 |
| sp P0ABH7 CISY_ECOLI-EIAAFR             | 0.457347 | 0.522563 | 0.60931  | 6.140919 | 0.351354 | 0.609691 | 0.290913 | 4.017976 | 0.464021 | 0.4447   | 0.725494 | 2.806498 |
| sp B7UIL4 RS2_ECO27-DAALSCDQFFVNHR      | 0.921294 | 0.7133   | 0.780887 | 0.245526 | 0.979592 | 2.3594   | 0.841895 | 0.208696 | 0.69234  | 3.0162   | 0.814295 | 0.288563 |
| sp P0A7L8 RL27_ECOLI-FISIEAE            | 1.099093 | 1.415734 | 0.559292 | 1.377351 | 1.166769 | 1.228712 | 0.558452 | 1.319608 | 0.817597 | 1.4684   | 0.393712 | 1.377351 |
| sp P0A9A7 FTSZ_ECOL6-GLGAGANPEVGR       | 0.611561 | 0.718516 | 0.686301 | 1.575122 | 0.841074 | 0.724065 | 0.686301 | 1.575122 | 1.066118 | 0.707811 | 0.686301 | 1.575122 |
| sp P0A8N6 SYK2_ECO57-GANEAIDFNDEL       | 1.415854 | 3.57755  | 1.557711 | 1.087502 | 1.252073 | 1.0704   | 1.164903 | 0.53876  | 0.765454 | 1.0704   | 1.380255 | 1.373992 |
| sp P0A9L3 FKBB_ECOLI-EGVNSTESGLQFR      | 0.955062 | 1.5783   | 1.13172  | 0.587579 | 0.566623 | 1.5783   | 1.13172  | 0.587579 | 0.82257  | 1.82265  | 1.134482 | 0.894204 |
| sp P0ACF4 DBHB_ECOLI-SQLIDK             | 1.153608 | 0.6402   | 2.96423  | 1.712981 | 1.734866 | 0.6402   | 1.213518 | 1.400308 | 1.738878 | 0.64915  | 1.795574 | 0.769942 |
| sp P0A6G1 CH10_ECO57-VGDIVIFNDGYGVK     | 0.874682 | 0.46225  | 0.71043  | 0.548118 | 0.761008 | 0.514    | 0.706162 | 0.294994 | 0.880012 | 0.6072   | 0.846954 | 0.211851 |
| sp A1AGI6 RPOA_ECOK1-LVDIEQVSSTHAK      | 0.626213 | 0.962149 | 1.192947 | 2.544965 | 1.70173  | 0.7033   | 0.96382  | 0.648371 | 1.317877 | 0.7546   | 0.96382  | 0.974182 |
| sp B1IQV7 PNP_ECOLC-VGYINDQYVLNPTQDELK  | 3.558824 | 1.8671   | 1.727145 | 1.050722 | 2.458534 | 1.0544   | 1.88203  | 0.365953 | 1.747473 | 1.58075  | 1.562386 | 0.50957  |
| sp P06959 ODP2_ECOLI-VNVGDK             | 0.248174 | 0.1995   | 0.700141 | 1.038932 | 0.292605 | 1.04885  | 0.630872 | 1.038932 | 0.709045 | 0.24965  | 0.752202 | 1.038932 |
| sp B7LA23 GLPK_ECO55-LINDAYDSEYFATK     | 3.150395 | 0.6262   | 1.026068 | 0.877606 | 1.859166 | 0.53365  | 0.857132 | 0.672657 | 1.730985 | 0.5225   | 0.799021 | 0.562627 |
| sp P0AFH9 OSMY_ECOL6-AALVDHDNIK         | 0.754    | 0.8308   | 2.081798 | 1.302172 | 1.856889 | 0.3947   | 2.368249 | 1.163781 | 1.488586 | 0.6621   | 1.146782 | 1.916584 |
| sp B7M1N4 RL3_ECO8A-GAVPGATGSDLIVKPAVK  | 0.508584 | 1.1302   | 0.97358  | 4.03516  | 0.715306 | 0.84525  | 2.908955 | 0.705887 | 0.952906 | 0.8038   | 1.984643 | 0.842065 |
| sp B7UHB4 CSRA_ECO27-EEIYQR             | 1.154269 | 0.4247   | 0.656148 | 1.74047  | 1.186044 | 0.4247   | 1.624513 | 0.789185 | 1.151608 | 0.41855  | 1.315739 | 2.439117 |
| sp B7MRB2 RL7_ECO81-AAGANK              | 1.495303 | 2.0537   | 1.140624 | 0.282028 | 2.050347 | 1.2481   | 1.595309 | 0.175163 | 1.526681 | 1.2481   | 1.776953 | 0.268006 |

|                                          |          |          |          |          |          |         |          |          |          |         |          |          |
|------------------------------------------|----------|----------|----------|----------|----------|---------|----------|----------|----------|---------|----------|----------|
| sp A7ZV12 CH60_ECO24-NVVLDK              | 0.363693 | 1.1279   | 0.509339 | 1.52596  | 0.495976 | 0.59885 | 0.624519 | 1.52596  | 0.359058 | 0.5686  | 0.642486 | 1.667977 |
| sp P0ACA3 SSPA_ECOLI-FPHPLMPVYPVAR       | 0.784726 | 1.1296   | 0.702122 | 4.769697 | 0.772858 | 1.09    | 0.796605 | 5.168171 | 0.802854 | 1.0035  | 0.791785 | 5.211292 |
| sp A7ZSL4 EFTU1_ECO24-MVVTLIHPIAMDDGLR   | 0.997616 | 0.89885  | 0.790049 | 1.331913 | 0.604707 | 1.0035  | 0.8601   | 1.129005 | 0.66783  | 0.6441  | 0.821982 | 0.977689 |
| sp P0A7D6 PURA_ECO57-LDVLDGLK            | 0.155063 | 4.5948   | 0.4063   | 2.575964 | 0.418825 | 2.58505 | 0.9199   | 1.378781 | 0.419519 | 0.57375 | 1.118401 | 1.489549 |
| sp B1XFM6 CLPX_ECODH-GIVYIDEIDK          | 0.5436   | 5.5498   | 1.687127 | 1.128627 | 0.53367  | 5.5498  | 2.859232 | 0.820716 | 1.242897 | 3.1226  | 0.773977 | 0.973761 |
| sp A1A7M1 BAMA_ECOK1-LAGDLETLR           | 0.728599 | 0.775674 | 0.422779 | 0.904871 | 0.798966 | 0.3885  | 0.504839 | 2.055528 | 0.228542 | 1.0271  | 0.587716 | 0.980631 |
| sp A7ZNR4 GATZ_ECO24-GLTEALTR            | 13.42261 | 0.932341 | 0.876369 | 0.972632 | 2.865232 | 0.8646  | 0.668923 | 0.918916 | 0.579008 | 0.8646  | 1.891011 | 0.918916 |
| sp B7N1C2 RS7_ECO81-FGSELLAK             | 1.430065 | 0.4363   | 2.526912 | 0.748025 | 0.829984 | 1.86695 | 2.132271 | 0.921121 | 1.235094 | 1.83595 | 1.631474 | 0.884467 |
| sp A7ZIN4 KAD_ECO24-DIMDAGK              | 0.336106 | 0.724    | 0.215883 | 0.232998 | 0.716739 | 0.71835 | 0.320774 | 0.712114 | 1.181182 | 1.1793  | 0.618033 | 0.846706 |
| sp A1AF92 GCSP_ECOK1-QGADIVFGSAQR        | 3.401616 | 0.8037   | 1.131414 | 0.267302 | 4.745328 | 0.8037  | 0.855309 | 0.267302 | 3.228139 | 0.8037  | 0.740993 | 0.120058 |
| sp P60624 RL24_ECOLI-VIVEGINLVK          | 1.514382 | 0.8933   | 13.83185 | 0.262257 | 1.514382 | 0.8286  | 0.816581 | 0.839827 | 1.74082  | 0.9721  | 0.489564 | 0.499567 |
| sp A7ZSL4 EFTU1_ECO24-FESEVYILSK         | 1.098223 | 3.5114   | 0.564862 | 0.814107 | 1.240227 | 2.0483  | 0.299639 | 0.750099 | 1.123441 | 2.4835  | 0.710719 | 0.752483 |
| sp B5Z3U4 TIG_ECO5E-DGAVEAEDR            | 1.919666 | 1.012977 | 1.667309 | 0.928009 | 2.682688 | 1.0005  | 1.222298 | 0.928009 | 2.458087 | 1.0005  | 1.373533 | 3.330229 |
| sp A7ZSJ0 RL15_ECO24-LNTLSPAEGSK         | 0.51394  | 1.2236   | 0.801233 | 1.847336 | 0.569426 | 1.3625  | 0.601439 | 1.449551 | 0.834362 | 1.3625  | 0.823672 | 1.130321 |
| sp P0A807 RRF_ECO57-QLASVTVEDSR          | 1.954881 | 0.58915  | 3.66054  | 2.037527 | 1.511173 | 0.8611  | 8.337093 | 2.545288 | 1.596132 | 0.8445  | 3.218052 | 1.558243 |
| sp P62593 BLAT_ECOLX-WEPELNEAIPNDER      | 0.565422 | 1.1663   | 0.335349 | 0.719477 | 2.899459 | 1.1842  | 0.796278 | 0.794801 | 1.951156 | 1.17525 | 0.955633 | 1.312392 |
| sp A8A466 PGK_ECOHS-VLPAVAMLEER          | 0.883202 | 0.7949   | 0.211339 | 0.237812 | 0.908162 | 0.8017  | 0.225596 | 0.160942 | 1.098147 | 0.8182  | 0.655233 | 0.160942 |
| sp P00968 CARB_ECOLI-ALEAAGVPVIGTSPDAIDR | 0.881051 | 2.6497   | 3.629086 | 1.115677 | 0.71929  | 1.1063  | 2.577699 | 1.288576 | 0.736792 | 1.3874  | 2.501186 | 1.278836 |
| sp A7ZV12 CH60_ECO24-VAAVK               | 5.705206 | 1.00375  | 0.099659 | 7.183613 | 4.877303 | 0.2999  | 0.348214 | 5.939508 | 1.175936 | 0.39255 | 0.663208 | 6.177568 |

|                                             |          |          |          |          |          |          |          |          |          |         |          |          |
|---------------------------------------------|----------|----------|----------|----------|----------|----------|----------|----------|----------|---------|----------|----------|
| sp P0A9C6 GLN1B_ECOL6-EQHV TIPAHQVNAEFFEEGK | 1.002035 | 0.8163   | 0.597672 | 0.815465 | 0.732757 | 0.8509   | 0.626583 | 2.353509 | 1.411556 | 0.8163  | 0.700137 | 3.201759 |
| sp Q1R626 RL18_ECOOUT-LQELGATR              | 0.677669 | 0.6886   | 0.272155 | 1.416808 | 0.839253 | 0.6886   | 0.64771  | 1.101634 | 2.768281 | 0.83405 | 1.133409 | 1.101634 |
| sp P62593 BLAT_ECOLX-GIIAALGPDGKPSR         | 0.614111 | 0.59875  | 0.702833 | 0.529    | 1.166176 | 0.5422   | 0.592946 | 0.427758 | 1.172434 | 0.68765 | 0.920497 | 0.480452 |
| sp P0ADZ2 RL23_ECO57-ASTAMEK                | 1.971007 | 1.749978 | 2.229107 | 2.048553 | 1.862523 | 2.366123 | 0.409983 | 1.295297 | 2.187688 | 2.29485 | 0.982874 | 1.867102 |
| sp A1A9S2 EFEO_ECOK1-GVLGLD                 | 1.031813 | 0.593207 | 5.04088  | 10.6913  | 2.641926 | 0.1184   | 3.905788 | 12.34069 | 1.918537 | 0.1184  | 3.610202 | 12.34069 |
| sp A1AID4 CAPP_ECOK1-DGNPNVTADITR           | 0.529322 | 2.0949   | 0.382494 | 1.02119  | 1.135982 | 1.5925   | 0.35801  | 0.838597 | 1.003922 | 1.4106  | 0.570394 | 0.995209 |
| sp A7ZUM3 PUR9_ECO24-ELDAETAQAISR           | 0.744171 | 1.78645  | 1.782461 | 1.900984 | 1.803827 | 1.5229   | 0.719637 | 0.490725 | 1.534276 | 1.4288  | 0.753299 | 0.37203  |
| sp A7ZTP1 IBPA_ECO24-GAHADEQK               | 2.555934 | 0.9093   | 1.118928 | 0.593242 | 2.891914 | 0.9093   | 1.326809 | 0.692405 | 2.792282 | 1.3529  | 1.255199 | 0.767161 |
| sp A8A439 YGFZ_ECOHS-DGDGFAWIER             | 4.59567  | 0.65665  | 1.63885  | 1.607437 | 4.974156 | 0.8057   | 1.63885  | 2.199564 | 3.016023 | 0.8057  | 1.155434 | 1.715313 |
| sp B1IQV7 PNP_ECOLC-DGISALQMDIK             | 0.491108 | 0.98805  | 0.192201 | 1.038673 | 0.658691 | 0.99855  | 0.206726 | 0.30336  | 1.349618 | 0.99855 | 0.122496 | 0.274259 |
| sp P0ADZ7 YAJC_ECOLI-LMDSIAK                | 0.571012 | 1.015691 | 4.798165 | 1.457346 | 0.431624 | 1.34185  | 8.014934 | 1.804122 | 0.460031 | 1.1644  | 1.604646 | 0.853249 |
| sp P0ABQ2 GARR_ECOLI-GGLAGSTVLDAK           | 1.878487 | 3.11685  | 5.236904 | 0.115677 | 3.190047 | 2.5444   | 2.889601 | 2.718395 | 1.987926 | 2.5444  | 2.889601 | 4.710359 |
| sp A7ZIN4 KAD_ECO24-EAEAGNTK                | 3.855743 | 0.6618   | 1.375271 | 1.655814 | 4.49146  | 0.69455  | 1.386533 | 1.332049 | 2.956888 | 0.8698  | 1.569574 | 1.123138 |
| sp P33602 NUOG_ECOLI-FQDEVGK                | 1.133315 | 5.65745  | 1.463348 | 0.726158 | 2.277544 | 1.21835  | 1.980255 | 0.9051   | 1.657004 | 1.21835 | 2.295416 | 0.644437 |
| sp P0AA27 THIO_ECO57-EFLDANLA               | 1.958174 | 1.5687   | 0.565726 | 3.419483 | 1.348631 | 1.4354   | 0.631511 | 2.665782 | 1.863422 | 1.1614  | 0.589404 | 1.959264 |
| sp P0AFG9 ODP1_ECO57-GFLIGGTSGR             | 1.313066 | 0.8624   | 0.599376 | 3.153555 | 1.152908 | 2.158    | 0.589207 | 3.192871 | 0.961721 | 1.7653  | 0.750098 | 0.927012 |
| sp P0A910 OMPA_ECOLI-GSVENGAYK              | 3.368398 | 1.72825  | 1.338911 | 0.879429 | 1.664255 | 1.72825  | 1.367415 | 0.842399 | 1.582947 | 1.8038  | 1.411083 | 0.998781 |
| sp P23843 OPPA_ECOLI-SPAFDSIMAETLK          | 1.605    | 0.6767   | 0.788923 | 1.071205 | 1.4993   | 0.8632   | 0.894074 | 0.655874 | 1.191068 | 0.8632  | 1.071241 | 0.731614 |
| sp B5Z3U4 TIG_ECO5E-IDGFR                   | 0.306752 | 0.616943 | 0.264136 | 1.445849 | 0.388748 | 0.5066   | 0.203032 | 0.864119 | 0.130012 | 0.5066  | 0.203032 | 1.123111 |

|                                            |          |          |          |          |          |          |          |          |          |         |          |          |
|--------------------------------------------|----------|----------|----------|----------|----------|----------|----------|----------|----------|---------|----------|----------|
| sp A7ZNT3 SYM_ECO24-SAYPDPQALIGR           | 0.924031 | 0.3288   | 0.962863 | 0.779622 | 0.788505 | 1.2887   | 0.30077  | 0.840958 | 0.660658 | 1.2887  | 0.359915 | 0.861302 |
| sp P0AGG9 TLDD_ECOL6-DGSYNIDQGVGVR         | 0.638523 | 1.012702 | 1        | 3.070836 | 0.474733 | 0.889749 | 0.565353 | 3.070836 | 0.906963 | 0.4902  | 0.565353 | 3.070836 |
| sp A7ZJZ6 SERC_ECO24-EFIQVAEEAEK           | 0.990483 | 0.7376   | 1.727633 | 1.577105 | 1.237748 | 1.1243   | 1.580299 | 3.208901 | 1.46291  | 0.9453  | 1.580299 | 1.400391 |
| sp B5Z2K8 RL9_ECO5E-LFGSIGTR               | 0.178109 | 1.7195   | 0.4444   | 3.177561 | 0.600075 | 1.7195   | 0.767309 | 2.065284 | 1.066174 | 1.16395 | 0.49076  | 1.887981 |
| sp P0AGD5 SODF_ECO57-SLEEIIR               | 0.618028 | 1.499708 | 1.216056 | 1.106947 | 0.60711  | 1.4711   | 1.1667   | 1.032125 | 0.48212  | 1.4563  | 0.935605 | 1.801043 |
| sp P69778 LPP_ECO57-SDVQAAK                | 1.506934 | 0.80705  | 0.406019 | 2.770759 | 2.233608 | 0.93855  | 0.767254 | 3.255492 | 2.189497 | 0.8154  | 0.767254 | 2.855489 |
| sp P69784 PTGA_ECOL6-LSGSVTVGETPVIR        | 4.195414 | 1.1592   | 0.661693 | 1.178944 | 3.447839 | 1.1626   | 0.416559 | 0.598899 | 2.795105 | 0.91805 | 0.419625 | 0.615858 |
| sp P0A6Y9 DNAK_ECOL6-AAIEAK                | 3.854582 | 0.8853   | 0.539654 | 0.279475 | 2.063778 | 0.1662   | 0.419567 | 0.29403  | 1.840667 | 0.52575 | 0.571297 | 0.195506 |
| sp B5Z3U4 TIG_ECO5E-FGVEDGSVEGLR           | 2.036618 | 1.8623   | 0.843106 | 1.402248 | 1.331673 | 1.3102   | 1.626991 | 1.328549 | 1.266296 | 1.3102  | 0.884226 | 1.339869 |
| sp A8A439 YGFZ_ECOHS-VTIAPDDER             | 1.853974 | 1.01835  | 0.528797 | 0.710582 | 2.563482 | 1.5827   | 0.601954 | 0.652384 | 2.563482 | 1.376   | 0.741864 | 0.652043 |
| sp B7LA26 RRAA_ECO55-VLVVDGGGSVR           | 2.529225 | 0.4431   | 1.239055 | 0.180994 | 1.777795 | 0.58105  | 2.397727 | 0.41954  | 1.87318  | 0.60515 | 1.878497 | 1.357245 |
| sp C4ZZ44 ILVC_ECOBW-DEFADGASYLQGK         | 1.159446 | 1.302163 | 0.111989 | 0.969811 | 1.094394 | 2.0546   | 0.095715 | 0.926139 | 0.822659 | 2.0546  | 0.244041 | 0.68392  |
| sp P00509 AAT_ECOLI-VAADFLAK               | 1.113202 | 0.4561   | 0.337535 | 1.40705  | 1.292011 | 0.4046   | 0.179471 | 1.348451 | 1.220405 | 0.4046  | 0.722286 | 1.634849 |
| sp P0AGF0 SUCD_ECOL6-SGTLTYEAVK            | 1.085804 | 1.5873   | 1.032264 | 0.59132  | 1.457802 | 0.64     | 1.130943 | 0.958554 | 1.496472 | 0.76235 | 0.823558 | 1.989551 |
| sp B7L6J2 SYT_ECO55-EYQYQEVK               | 0.707384 | 0.4125   | 0.3642   | 1.623996 | 0.915741 | 1.038    | 1.03339  | 2.074357 | 1.001952 | 0.9592  | 1.227739 | 1.531132 |
| sp B7MRB2 RL7_ECO81-TEFDVILK               | 3.459048 | 0.3088   | 1.431254 | 0.993905 | 3.459048 | 0.5564   | 2.111915 | 0.925218 | 1.129268 | 0.5675  | 1.875276 | 0.855036 |
| sp P0AC41 SDHA_ECOLI-IYQSTTNAHINTGDGVGMAIR | 0.814246 | 0.598001 | 0.576896 | 0.612528 | 1.030056 | 0.705263 | 0.66564  | 0.850121 | 0.792402 | 0.5827  | 1.075348 | 0.762653 |
| sp A7ZJD0 GPMA_ECO24-AAAVANQGK             | 1.658376 | 1.8809   | 0.755806 | 1.724954 | 1.17195  | 1.18605  | 1.470599 | 2.080114 | 1.146633 | 0.8662  | 1.034235 | 0.896513 |
| sp P0A6Y9 DNAK_ECOL6-MAPPQISAEVLK          | 0.350957 | 0.6763   | 6.520517 | 4.180004 | 0.540576 | 0.7342   | 5.613483 | 2.013324 | 0.870511 | 0.7376  | 1.464078 | 1.136036 |



|                                     |          |          |          |          |          |          |          |          |          |         |          |          |
|-------------------------------------|----------|----------|----------|----------|----------|----------|----------|----------|----------|---------|----------|----------|
| sp P0ACF4 DBHB_ECOLI-EITIAAAK       | 4.916655 | 0.4283   | 1.000501 | 1.051319 | 2.828321 | 1.1194   | 0.916654 | 1.070422 | 2.03623  | 0.88615 | 1.253599 | 1.552136 |
| sp P0AE10 AHPC_ECO57-EDEGLADR       | 2.541194 | 1.6855   | 1.078194 | 5.030723 | 2.389499 | 1.5655   | 0.795232 | 2.85251  | 2.378381 | 1.978   | 0.675123 | 2.472281 |
| sp A7ZTP1 IBPA_ECO24-NFDLSPLYR      | 0.836668 | 1.1469   | 0.879927 | 0.983079 | 0.753076 | 1.1153   | 1.103927 | 0.645612 | 0.811208 | 1.1035  | 1.11173  | 0.573101 |
| sp P0A8N4 SYK1_ECOL6-ASFVTLQDVGGR   | 0.640279 | 2.0133   | 1.141178 | 1.022934 | 0.738294 | 1.3971   | 0.907505 | 0.883836 | 0.670604 | 1.2109  | 0.933842 | 0.838566 |
| sp A1A7K0 GSA_ECOK1-AFTGVGGTPLFIEK  | 1.170737 | 1.2233   | 0.732819 | 1.78814  | 0.832288 | 1.1247   | 0.462769 | 0.716527 | 1.017836 | 1.1247  | 0.390361 | 1.402964 |
| sp A8A750 KATG_ECOHS-LALMPQR        | 1.666609 | 3.1952   | 1.239387 | 2.161329 | 3.439928 | 1.0782   | 1.603579 | 1.672853 | 4.035552 | 1.0872  | 2.268663 | 1.519933 |
| sp P0ACF4 DBHB_ECOLI-NPQTGK         | 2.260256 | 0.6398   | 1.729743 | 0.582428 | 3.360532 | 0.70665  | 1.127366 | 1.018394 | 2.169399 | 0.7735  | 0.95624  | 1.838352 |
| sp P38489 NFSB_ECOLI-FFADMHR        | 1.030136 | 0.803519 | 0.900146 | 0.61882  | 0.500328 | 0.861697 | 1.062031 | 0.31503  | 0.666878 | 0.79154 | 1.263354 | 0.446931 |
| sp P0A6Z5 HTPG_ECO57-GLIDSSDLPLNVS  | 1.124912 | 3.039    | 0.729056 | 2.339445 | 1.366252 | 0.7401   | 0.914888 | 2.350724 | 1.24256  | 0.8671  | 0.805595 | 2.350724 |
| sp P00490 PHSM_ECOLI-FNDGDFLR       | 0.803024 | 1.3283   | 0.542648 | 1.658394 | 0.869213 | 1.3283   | 0.542648 | 0.899912 | 0.900881 | 1.3283  | 0.782305 | 1.350234 |
| sp P0A7W3 RS5_ECO57-QAGELQEK        | 0.884014 | 0.9964   | 1.411683 | 0.860249 | 1.237507 | 0.9964   | 1.564626 | 0.790137 | 1.062428 | 0.6926  | 2.0181   | 0.617268 |
| sp P0A6Y9 DNAK_ECOL6-MQELAQVSQK     | 0.296163 | 0.5935   | 1.668925 | 0.841328 | 0.357712 | 0.8391   | 1.184069 | 0.766244 | 0.290311 | 1.1709  | 0.996156 | 0.766313 |
| sp A7ZJA8 SUCC_ECO24-IILSDDK        | 1.007123 | 2.0729   | 0.614341 | 1.035448 | 0.599738 | 1.5148   | 0.728877 | 0.860679 | 0.743689 | 1.5678  | 1.019962 | 0.778473 |
| sp P0AD62 KPYK1_ECO57-EITSTDDFYR    | 3.788606 | 0.3845   | 0.622524 | 2.232894 | 3.193509 | 0.3845   | 0.767526 | 2.780801 | 2.069209 | 0.69    | 0.532631 | 1.900125 |
| sp A7ZJA8 SUCC_ECO24-LADSGLNIIAAK   | 0.535646 | 2.7355   | 1.120768 | 0.496772 | 0.573585 | 0.777    | 0.816423 | 0.496772 | 0.629338 | 0.5597  | 0.683001 | 0.435803 |
| sp P76558 MAO2_ECOLI-GVTQEQAQR      | 0.616797 | 3.9073   | 0.68386  | 0.241812 | 0.820733 | 3.9073   | 0.68386  | 0.271132 | 1.111165 | 3.9073  | 0.373262 | 0.322043 |
| sp A1A9S2 EFEO_ECOK1-GVMVVEER       | 0.871949 | 2.4506   | 1.482782 | 1.007401 | 0.691885 | 1.82975  | 1.431285 | 3.439599 | 1.269716 | 1.59465 | 1.371697 | 0.693797 |
| sp P0A7D6 PURA_ECO57-AEAVDYQK       | 1.619926 | 1.37404  | 0.266226 | 8.076039 | 1.619926 | 2.3658   | 0.142347 | 8.577674 | 1.082169 | 1.37525 | 0.239766 | 3.102871 |
| sp P0A6Y9 DNAK_ECOL6-QAVTNPQNTLFAIK | 0.962756 | 0.774    | 0.951542 | 0.457977 | 1.278717 | 0.774    | 0.415892 | 0.295214 | 1.37716  | 0.868   | 0.504405 | 0.356641 |

|                                      |          |          |          |          |          |          |          |          |          |          |          |          |
|--------------------------------------|----------|----------|----------|----------|----------|----------|----------|----------|----------|----------|----------|----------|
| sp P0AFG9 ODP1_ECO57-WNMLHPLETPR     | 0.619852 | 1.064893 | 1.454736 | 1.356308 | 0.685736 | 0.88355  | 0.93882  | 2.368582 | 1.005241 | 0.8435   | 0.977668 | 1.618169 |
| sp C4ZRQ8 DAPD_ECOBW-ETGEIHYGR       | 1.722619 | 1.2894   | 0.472446 | 1.066969 | 1.169484 | 1.2894   | 0.404323 | 0.845887 | 1.169484 | 1.2894   | 0.404323 | 0.845887 |
| sp A8A750 KATG_ECOHS-VMNLDR          | 0.418326 | 0.749243 | 1.350704 | 1.597543 | 0.752798 | 0.731651 | 1.350704 | 1.140349 | 0.84427  | 0.852    | 1.346154 | 0.842532 |
| sp B5Z0E9 EFTS_ECO5E-VLDAAVAGK       | 0.928607 | 1.2282   | 1.651421 | 1.734175 | 0.784343 | 1.2282   | 0.543471 | 1.458953 | 0.795155 | 1.2021   | 1.195225 | 1.302831 |
| sp P17169 GLMS_ECOLI-GTDVDQPR        | 1.645611 | 1.025678 | 0.779943 | 2.788246 | 1.836204 | 0.877895 | 0.586449 | 3.664512 | 1.836204 | 0.902894 | 0.586449 | 3.664512 |
| sp A7ZUM3 PUR9_ECO24-EMDDNEGSLTLATR  | 0.644482 | 0.7822   | 1.326719 | 1.289361 | 0.644482 | 0.9405   | 1.37509  | 0.796632 | 0.806664 | 0.7822   | 1.37509  | 1.142924 |
| sp B7LA23 GLPK_ECO55-WILDHVEGSR      | 3.285414 | 0.2273   | 3.385495 | 4.110486 | 5.495556 | 0.2316   | 2.984214 | 1.006108 | 5.495556 | 0.2316   | 2.669641 | 1.09398  |
| sp B5Z2K8 RL9_ECO5E-INALETVTIASK     | 0.814439 | 1.7392   | 0.344587 | 0.471369 | 0.257562 | 2.4156   | 1.197906 | 0.433758 | 0.673032 | 0.9308   | 0.914878 | 0.170764 |
| sp P07014 SDHB_ECOLI-YNPDVDDAPR      | 1.091852 | 1.3785   | 0.491443 | 2.248394 | 1.356036 | 1.3785   | 0.625546 | 2.138723 | 1.8398   | 2.29645  | 0.662799 | 1.950897 |
| sp P0A6Y9 DNAK_ECOL6-LESLVEDLVNR     | 1.819046 | 0.775706 | 1.007636 | 0.147401 | 1.878236 | 0.197    | 0.573194 | 0.107761 | 0.704639 | 0.197    | 1.128057 | 0.107761 |
| sp P0A9P2 DLDH_ECO57-FTGANTLEVEGENGK | 2.027985 | 1.7526   | 0.41779  | 0.081307 | 2.274683 | 1.2955   | 0.41779  | 0.328885 | 3.092785 | 1.2955   | 0.41779  | 0.328885 |
| sp A7ZUM3 PUR9_ECO24-AADEGLEVK       | 4.681531 | 1.11815  | 1.340801 | 1.835511 | 6.881058 | 1.11815  | 1.340801 | 1.842172 | 2.100153 | 1.2904   | 2.048767 | 2.474168 |
| sp P09546 PUTA_ECOLI-AAITAAAYR       | 0.817738 | 2.0169   | 2.584139 | 12.36236 | 0.60082  | 2.0169   | 2.573344 | 12.36236 | 0.524948 | 2.0169   | 4.029965 | 3.383734 |
| sp A7ZV12 CH60_ECO24-AVAAGMNPMDLK    | 0.29263  | 3.6123   | 0.935553 | 0.440228 | 0.999683 | 1.1744   | 0.832934 | 0.465903 | 0.943574 | 1.1601   | 1.206288 | 0.451938 |
| sp P0A7V4 RS3_ECOL6-LVADSITSQLER     | 1.598045 | 0.668    | 1.936741 | 0.688859 | 1.715533 | 0.668    | 1.936741 | 1.119227 | 2.533442 | 0.5143   | 0.507452 | 0.566959 |
| sp P0A910 OMPA_ECOLI-RVEIEVK         | 0.413585 | 1.343432 | 2.255431 | 1.163684 | 0.608861 | 0.8919   | 3.409537 | 1.163684 | 0.680809 | 0.84295  | 2.064138 | 1.679791 |
| sp P0ACG0 HNS_ECO57-REEESAAAEEVEER   | 0.60881  | 0.3445   | 0.741893 | 4.97434  | 0.876508 | 0.613    | 1.295079 | 2.278174 | 0.768407 | 0.62555  | 1.177635 | 3.026933 |
| sp A7ZHT6 SYP_ECO24-VVAAAIEQNYDER    | 0.377567 | 0.5892   | 2.199725 | 0.364732 | 0.339207 | 0.71465  | 1.333394 | 0.536533 | 0.752599 | 0.8453   | 1.283119 | 0.528122 |
| sp B7NH52 DEOD_ECOLU-YIAETFLEDAR     | 1.344032 | 1.379279 | 0.550059 | 0.06499  | 0.356959 | 1.193351 | 0.526663 | 0.096516 | 0.356959 | 0.849388 | 0.622525 | 0.096516 |

|                                       |          |          |          |          |          |         |          |          |          |         |          |          |
|---------------------------------------|----------|----------|----------|----------|----------|---------|----------|----------|----------|---------|----------|----------|
| sp P27302 TKT1_ECOLI-AINEDAAGNYIHYGVR | 0.239155 | 1.4061   | 0.461678 | 0.94839  | 0.895023 | 1.0778  | 0.892549 | 0.619749 | 0.813689 | 1.24195 | 0.892549 | 1.648602 |
| sp A8A5E7 EFG_ECOHS-ASYTMEFLK         | 0.452641 | 0.96865  | 0.472104 | 0.336863 | 0.438536 | 0.7393  | 0.903628 | 1.737109 | 0.814524 | 0.6608  | 0.799801 | 1.412805 |
| sp A7ZSK4 RL22_ECO24-LVADLR           | 0.490059 | 0.6265   | 1.96371  | 3.353698 | 0.490059 | 0.6265  | 1.96371  | 3.353698 | 0.843599 | 0.7848  | 1.642709 | 2.011322 |
| sp P0ADY2 PPID_ECOL6-AEQQAK           | 2.963892 | 0.59685  | 0.42204  | 0.264623 | 1.844953 | 0.8614  | 0.299693 | 0.265847 | 1.437762 | 0.8614  | 1.031087 | 0.466628 |
| sp P52643 LDHD_ECOLI-GALIDSQAAIEALK   | 2.077789 | 0.93405  | 1.318017 | 0.384637 | 4.045292 | 0.7417  | 1.318017 | 3.136121 | 5.776557 | 0.8544  | 1.287866 | 0.12993  |
| sp P0A6F2 CARA_ECO57-DLPLIASNFR       | 1.54652  | 3.7415   | 7.103416 | 0.458925 | 2.088759 | 1.07    | 5.547361 | 0.32621  | 1.026928 | 1.36455 | 2.968364 | 0.559067 |
| sp P0AFG9 ODP1_ECO57-WDELLR           | 5.954953 | 0.3967   | 0.461066 | 2.3725   | 0.848668 | 0.3967  | 0.368081 | 2.449119 | 2.211815 | 0.6478  | 0.337187 | 2.613939 |
| sp P0AFG9 ODP1_ECO57-EISTTIAFVR       | 0.440444 | 1.508121 | 1.246801 | 1.615399 | 0.551888 | 2.3878  | 1.049597 | 2.678489 | 1.438539 | 1.44655 | 1.611068 | 1.760216 |
| sp P0A7W0 RS4_ECO57-AALELAEQR         | 0.54787  | 1.6393   | 1.341627 | 1.000887 | 0.54787  | 1.6393  | 1.782525 | 1.422184 | 0.728689 | 1.6393  | 1.530965 | 1.691398 |
| sp A7ZSJ4 RL6_ECO24-APVVVPAGVDVK      | 9.928332 | 0.4133   | 0.439009 | 1.331654 | 8.186928 | 0.4133  | 1.916072 | 1.331654 | 2.306085 | 0.6168  | 0.732667 | 1.658226 |
| sp P31979 NUOF_ECOLI-EEFEAGIK         | 4.907829 | 2.845314 | 0.506696 | 4.693952 | 25.7476  | 4.6528  | 1.34429  | 2.691748 | 2.572618 | 4.2857  | 0.967479 | 1.326743 |
| sp B7M1N3 RL4_ECO8A-LIVVEK            | 0.9261   | 0.5849   | 1.352547 | 2.539513 | 0.748019 | 0.5849  | 1.021118 | 3.319583 | 1.907599 | 0.5849  | 0.825349 | 2.155559 |
| sp P0A6Y9 DNAK_ECOL6-SIEPLK           | 1.530069 | 1.6159   | 0.900253 | 0.512181 | 0.774389 | 0.848   | 1.021195 | 0.429149 | 0.974598 | 0.848   | 0.961211 | 0.442591 |
| sp A8A750 KATG_ECOHS-LDYGLK           | 1.539786 | 0.9825   | 12.75966 | 1.260946 | 0.54601  | 0.3703  | 17.96355 | 0.843641 | 0.319412 | 0.3703  | 20.17837 | 0.655925 |
| sp A1A9Q9 NQOR_ECOK1-QPSQEELSIAR      | 1.51239  | 0.7235   | 0.134984 | 0.335223 | 1.170427 | 0.72415 | 0.322861 | 0.576582 | 1.116259 | 0.70405 | 0.778927 | 0.39825  |
| sp P08200 IDH_ECOLI-GMEGAINAK         | 0.679932 | 1.3122   | 1.612057 | 0.655701 | 1.014253 | 1.1879  | 1.467231 | 1.150846 | 1.189825 | 1.1293  | 1.704672 | 1.228075 |
| sp B5Z0E9 EFTS_ECO5E-VALVAK           | 0.530831 | 0.81305  | 1.007764 | 0.952883 | 1.070686 | 0.5028  | 0.663354 | 0.631121 | 1.237237 | 0.8324  | 0.650495 | 0.534179 |
| sp A7ZUM3 PUR9_ECO24-DLGMVGAEEELR     | 0.910248 | 1.3244   | 0.290735 | 1.676899 | 1.179563 | 1.16745 | 0.749666 | 1.030151 | 1.032775 | 1.3244  | 0.865449 | 1.196075 |
| sp B5Z0E9 EFTS_ECO5E-TGAGMMDCK        | 0.811433 | 1.312063 | 1.13339  | 9.97835  | 0.895865 | 2.1961  | 0.952703 | 4.655538 | 0.999909 | 2.1961  | 2.013174 | 0.53524  |

|                                       |          |          |          |          |          |          |          |          |          |         |          |          |
|---------------------------------------|----------|----------|----------|----------|----------|----------|----------|----------|----------|---------|----------|----------|
| sp A7ZPS1 PUR7_ECO24-GEVVLGDEFSPDGSR  | 2.82405  | 1.0872   | 0.643307 | 1.265227 | 3.253746 | 0.4609   | 1.055009 | 0.8383   | 1.469701 | 0.4047  | 0.772671 | 1.046667 |
| sp A1AGC3 RS9_ECOK1-ALMEYDESLR        | 0.983895 | 0.95815  | 0.878858 | 2.378633 | 1.424007 | 0.95815  | 1.968947 | 1.152573 | 0.935372 | 0.95815 | 1.434616 | 0.979    |
| sp P0AFG5 ODO1_ECO57-EHLGTGDVK        | 1.438693 | 1.157614 | 0.869769 | 1.237684 | 10.11692 | 0.3037   | 0.298357 | 1.379034 | 1.890786 | 1.2497  | 4.632019 | 0.913666 |
| sp B7UPE0 RL10_ECO27-GALSAVVADSR      | 2.298433 | 0.7945   | 0.992833 | 1.630427 | 1.620264 | 0.8538   | 0.626494 | 1.832803 | 1.337563 | 0.883   | 0.604277 | 1.706429 |
| sp P0AER1 GLPF_ECOL6-ETTPSEQK         | 2.826928 | 2.3427   | 0.560861 | 1.110388 | 2.687699 | 1.9066   | 0.191605 | 0.753058 | 2.656641 | 1.9066  | 0.572622 | 0.725182 |
| sp P00968 CARB_ECOLI-GVIVQYGGQTPK     | 0.737702 | 0.8355   | 1.443102 | 1.446746 | 2.25156  | 0.7064   | 1.870433 | 1.446746 | 2.553234 | 0.7064  | 1.443102 | 0.712597 |
| sp P0AFG7 ODO2_ECO57-DVDTLGMADIEK     | 0.274598 | 1.7391   | 1.209928 | 0.952802 | 1.343554 | 1.7391   | 0.869851 | 0.66533  | 1.062533 | 1.7391  | 0.755521 | 0.751341 |
| sp P0A9M2 HPRT_ECOLI-DSGSDMVLVGLLR    | 0.288463 | 1.080382 | 1.261891 | 0.4451   | 0.362013 | 1.0523   | 1.193674 | 0.255967 | 0.378449 | 1.083   | 1.323372 | 1.338525 |
| sp B5Z3U4 TIG_ECO5E-QDVLGDLMSR        | 0.793115 | 1.02035  | 1.779762 | 0.858599 | 0.964461 | 1.4764   | 1.619074 | 0.884125 | 0.969904 | 1.4764  | 1.316023 | 0.707183 |
| sp P0A9R0 DHAS_ECO57-ELTPAAVTGTLTPVGR | 0.830077 | 0.99415  | 1.724452 | 0.922945 | 0.850992 | 1.1175   | 1.205145 | 1.316819 | 0.951629 | 1.1175  | 0.922637 | 2.435296 |
| sp B7MIU7 RS16_ECO45-VAALIK           | 2.204423 | 0.2135   | 2.14304  | 2.53244  | 2.519081 | 0.2135   | 2.047024 | 1.832132 | 1.067453 | 0.2048  | 1.90102  | 3.542416 |
| sp P0AC41 SDHA_ECOLI-SVNMEPK          | 0.541879 | 1.5437   | 0.345098 | 0.70098  | 2.04692  | 0.8104   | 0.241654 | 0.398505 | 1.534387 | 0.7661  | 0.724976 | 1.056125 |
| sp P0A9P2 DLDH_ECO57-HYFDPK           | 3.860613 | 0.47965  | 2.758431 | 0.120968 | 2.924687 | 0.5039   | 3.871655 | 0.378745 | 2.924687 | 0.5039  | 2.755219 | 0.247302 |
| sp P0A7D6 PURA_ECO57-IVDLLTER         | 4.250031 | 1.230574 | 0.584124 | 2.813635 | 5.491471 | 0.979321 | 0.584124 | 2.778456 | 3.846203 | 0.2806  | 0.372487 | 1.821611 |
| sp B1IQV7 PNP_ECOLC-WDQPEPVNEALNAR    | 2.06247  | 1.797617 | 4.950399 | 3.433082 | 1.926289 | 2.1874   | 6.266751 | 1.634393 | 1.926289 | 2.40095 | 5.021627 | 2.964575 |
| sp P0A717 KPRS_ECOLI-LYTSLGDAAVGR     | 0.233807 | 0.8517   | 1.271868 | 1.286193 | 1.001113 | 0.95915  | 1.667718 | 1.453618 | 1.18511  | 0.95915 | 1.603886 | 1.11033  |
| sp A7ZSL0 RS10_ECO24-LVDIVPEK         | 0.590301 | 0.6183   | 1.057989 | 0.717065 | 0.854812 | 0.89225  | 0.905508 | 0.838792 | 0.900759 | 0.7936  | 0.759413 | 0.837254 |
| sp P0ACG2 STPA_ECO57-SLDDFLI          | 1.104238 | 1.6257   | 1.548267 | 0.177157 | 1.072115 | 1.6257   | 1.20048  | 0.50037  | 1.136607 | 1.4343  | 1.269515 | 0.574557 |
| sp A7ZKD6 YCDX_ECO24-VVDGVGILR        | 0.855572 | 0.961107 | 0.468712 | 0.720749 | 0.855572 | 1.135195 | 0.468712 | 0.616952 | 3.463336 | 1.1597  | 0.802362 | 0.545445 |

|                                      |          |          |          |          |          |          |          |          |          |         |          |          |
|--------------------------------------|----------|----------|----------|----------|----------|----------|----------|----------|----------|---------|----------|----------|
| sp B1X8H5 SYGB_ECODH-VANLAEAQPDR     | 2.078943 | 1.198555 | 0.925214 | 1.435707 | 1.831431 | 0.44425  | 1.937081 | 0.64182  | 1.466536 | 0.44425 | 1.833565 | 0.751994 |
| sp P08200 IDH_ECOLI-VVVAQGK          | 0.578327 | 0.434    | 2.990524 | 0.967753 | 0.981915 | 0.434    | 1.110726 | 0.970294 | 0.847679 | 0.434   | 0.986492 | 0.691018 |
| sp K0BE10 TAL_ECO1E-LYNDAGISNDR      | 1.06567  | 1.1749   | 1.730387 | 0.589617 | 0.631032 | 0.94505  | 1.108397 | 0.43991  | 0.559541 | 1.1749  | 1.188282 | 0.362683 |
| sp P62593 BLAT_ECOLX-VDAGQEQLGR      | 2.014259 | 0.51495  | 2.299505 | 1.567428 | 1.900864 | 0.5481   | 1.070825 | 0.957363 | 1.508155 | 0.70765 | 0.945029 | 0.957363 |
| sp B5Z0E9 EFTS_ECO5E-AGNVAADGVK      | 1.277763 | 0.53865  | 0.558314 | 1.358985 | 1.277763 | 0.5391   | 0.617668 | 1.802519 | 1.329405 | 0.50825 | 0.596295 | 0.733129 |
| sp P0AFG9 ODP1_ECO57-NIAHQVK         | 11.51471 | 1.3041   | 0.544992 | 0.324788 | 11.51471 | 1.3041   | 0.721107 | 1.185266 | 7.880882 | 1.3041  | 1.027137 | 0.370021 |
| sp A7ZTU5 ATPG_ECO24-ALLDTLLR        | 0.541347 | 0.4472   | 0.132368 | 0.180995 | 1.911226 | 0.8547   | 0.230435 | 0.065772 | 1.911226 | 0.8276  | 0.230435 | 0.065772 |
| sp P0A7W0 RS4_ECO57-QLVSHK           | 0.618029 | 1.763    | 2.432674 | 2.352857 | 0.744149 | 1.08955  | 4.094361 | 1.430767 | 0.708333 | 0.4161  | 4.094361 | 1.835011 |
| sp B1IU2 SYA_ECOLC-GDSNNLADK         | 0.799494 | 2.0867   | 0.876115 | 0.661797 | 3.907289 | 2.0867   | 0.972085 | 1.102009 | 3.049379 | 2.0867  | 1.201597 | 1.184649 |
| sp B7L4J7 RL5_ECO55-LITIAVPR         | 0.885592 | 1.66475  | 1.656143 | 0.594399 | 0.885592 | 0.93805  | 1.333694 | 0.622735 | 0.86443  | 1.085   | 1.333694 | 0.521227 |
| sp P15254 PUR4_ECOLI-LLAYHDR         | 2.135145 | 0.627061 | 3.185881 | 2.482915 | 2.377493 | 0.8452   | 2.437961 | 1.618395 | 1.601192 | 0.6364  | 0.848232 | 0.650538 |
| sp P0A7M2 RL28_ECOLI-GIDTVLAELR      | 0.629981 | 1.19335  | 6.255296 | 0.361291 | 2.540268 | 1.19335  | 6.48779  | 0.586691 | 1.019772 | 0.7406  | 7.403224 | 1.245738 |
| sp P09373 PFLB_ECOLI-VDDLAVDLVER     | 2.545999 | 0.83475  | 1.072168 | 2.749842 | 0.979102 | 1.1406   | 0.709178 | 1.51095  | 1.100252 | 1.1406  | 0.938696 | 1.153583 |
| sp P27302 TKT1_ECOLI-DIDGHDAASIK     | 5.895006 | 2.184374 | 0.578273 | 14.84325 | 11.61118 | 2.392618 | 0.225582 | 4.241596 | 9.043055 | 3.066   | 0.225582 | 3.029972 |
| sp A7ZV12 CH60_ECO24-ATLEDLGQAK      | 0.453352 | 0.33285  | 0.565772 | 3.73166  | 0.278683 | 0.4733   | 0.708745 | 1.111872 | 0.296006 | 0.6364  | 0.697475 | 1.170228 |
| sp P52643 LDHD_ECOLI-SNDVIQDDVFR     | 1.563909 | 1.09295  | 4.415746 | 1.006019 | 0.356046 | 1.0457   | 7.169096 | 0.844608 | 0.523633 | 1.0457  | 11.46619 | 0.930938 |
| sp P0AB72 ALF_ECO57-DSQEYVSK         | 3.204106 | 0.8705   | 1.162638 | 0.872668 | 2.704704 | 1.65235  | 1.257632 | 0.744883 | 2.392182 | 2.1909  | 1.321219 | 0.763675 |
| sp P17169 GLMS_ECOLI-RQDIESNLQYDAGDK | 1.373596 | 2.55515  | 0.886482 | 1.395094 | 1.541958 | 2.7963   | 1.15639  | 1.090655 | 1.80172  | 2.55515 | 0.927343 | 0.871929 |
| sp B7NF50 ATPA_ECOLU-ELIIGDR         | 1.893292 | 2.9618   | 1.892986 | 0.207454 | 0.848702 | 1.60495  | 3.310225 | 0.497158 | 0.406811 | 1.72275 | 2.101496 | 0.645606 |

|                                         |          |          |          |          |          |          |          |          |          |          |          |          |
|-----------------------------------------|----------|----------|----------|----------|----------|----------|----------|----------|----------|----------|----------|----------|
| sp P0AB72 ALF_ECO57-IFDFVKPGVITGDDVQK   | 0.82353  | 1.6574   | 0.13857  | 0.656466 | 0.899211 | 0.4748   | 0.13857  | 0.910888 | 1.205724 | 0.71515  | 0.13857  | 0.855821 |
| sp A8A5E7 EFG_ECOHS-YLGGEELEAEIK        | 0.292509 | 1.23415  | 2.148232 | 0.57212  | 0.319228 | 1.2183   | 1.166617 | 1.435513 | 0.595189 | 1.11045  | 1.145454 | 0.887412 |
| sp P33602 NUOG_ECOLI-LDDIAAWTYR         | 1.33217  | 1.1253   | 1.215301 | 0.671147 | 1.621377 | 0.8512   | 1.757658 | 0.779707 | 1.257129 | 0.6758   | 2.223315 | 0.779707 |
| sp A8A5E7 EFG_ECOHS-EFNVEANVGKPVAYR     | 8.221128 | 1.0301   | 1.142507 | 1.023972 | 14.65158 | 0.3318   | 2.698592 | 0.997844 | 6.883386 | 0.30585  | 1.20192  | 0.967012 |
| sp A1A9Q9 NQOR_ECOK1-AVAEGASK           | 1.110048 | 0.6396   | 0.897289 | 0.822588 | 1.725103 | 0.6407   | 0.913091 | 0.684941 | 1.411831 | 0.71665  | 0.975399 | 0.646446 |
| sp P0AFG7 ODO2_ECO57-ELLEDPTR           | 0.695604 | 1.1164   | 0.89513  | 0.579527 | 0.745942 | 1.7381   | 1.105608 | 0.923465 | 1.222715 | 1.38815  | 1.537391 | 0.713587 |
| sp B7LA23 GLPK_ECO55-AVVMHDANIISVSQR    | 1.842542 | 1.13775  | 0.946348 | 2.842325 | 1.855307 | 0.898    | 1.224338 | 2.849886 | 1.897131 | 0.8786   | 1.064564 | 3.329754 |
| sp P25553 ALDA_ECOLI-NDIAMGPLINAAALER   | 0.110213 | 0.98885  | 1.220762 | 1.295146 | 0.138783 | 0.98885  | 1.784818 | 0.909982 | 0.204778 | 1.17325  | 2.220903 | 0.820972 |
| sp P0A7W0 RS4_ECO57-IYGVLER             | 0.533463 | 1.0567   | 1.078897 | 1.836499 | 0.533463 | 1.0567   | 1.078897 | 1.884069 | 1.034517 | 1.4767   | 0.713898 | 2.656001 |
| sp A7ZJA8 SUCC_ECO24-LHGGEPANFLDVGGGATK | 0.199964 | 0.2858   | 0.90035  | 1.597757 | 0.257672 | 0.49175  | 0.891417 | 0.778161 | 0.244827 | 0.49175  | 0.927643 | 0.668875 |
| sp A7ZPA8 YFBU_ECO24-MEMTNAQR           | 3.516155 | 0.92     | 0.55905  | 0.296007 | 7.031801 | 0.92     | 0.625196 | 0.311924 | 7.031801 | 0.92     | 0.595425 | 0.311924 |
| sp B5YXN3 KDSA_ECO5E-DPFGAASGGR         | 8.613032 | 0.679044 | 1.773178 | 0.205058 | 10.70411 | 0.547349 | 1.639151 | 0.312135 | 8.983144 | 0.4868   | 2.014708 | 0.692183 |
| sp A7ZUK1 RPOB_ECO24-VDLSTFSDEEVMR      | 5.900209 | 0.607762 | 36.83231 | 0.767593 | 5.900209 | 0.828064 | 36.83231 | 0.743765 | 6.262387 | 0.962145 | 7.558186 | 0.960489 |
| sp P0ACA3 SSPA_ECOLI-DSFLASLAEER        | 0.320128 | 1.9858   | 1.40873  | 0.160358 | 2.136509 | 1.369    | 0.845852 | 0.860973 | 2.757296 | 1.06855  | 0.995468 | 0.648765 |
| sp P17169 GLMS_ECOLI-GAYGTVIMDSR        | 1.591232 | 1.6676   | 1.355632 | 0.835487 | 1.533711 | 1.6676   | 1.602393 | 0.857168 | 1.533711 | 1.8575   | 1.226637 | 1.652528 |
| sp A1AF92 GCSP_ECOK1-YMHSLER            | 1.063457 | 1.640548 | 0.830168 | 0.291814 | 0.858976 | 1.487    | 0.851136 | 0.104866 | 0.855164 | 1.487    | 0.773508 | 0.104866 |
| sp P0A9B3 G3P_ECOL6-AGIALNDNFVK         | 0.540367 | 1.33455  | 0.598728 | 1.583793 | 0.849796 | 1.0224   | 0.847591 | 0.78964  | 1.067234 | 0.8136   | 0.768693 | 0.97785  |
| sp B7MRB2 RL7_ECO81-DDAEALK             | 4.321708 | 2.140951 | 0.264205 | 1.719148 | 8.339617 | 2.278849 | 0.103317 | 1.918258 | 0.791858 | 1.753491 | 0.673141 | 1.918258 |
| sp P0AB82 ILVE_ECO57-SVDGIQVGEGR        | 0.41469  | 0.6895   | 3.101795 | 6.583554 | 0.724747 | 0.2409   | 5.570799 | 5.933908 | 0.638763 | 0.2409   | 5.567203 | 3.085278 |

|                                        |          |          |          |          |          |          |          |          |          |          |          |          |
|----------------------------------------|----------|----------|----------|----------|----------|----------|----------|----------|----------|----------|----------|----------|
| sp P0AG68 RS1_ECOL6-QLGEDPWVAIAK       | 1.34174  | 0.82015  | 0.371472 | 1.663756 | 1.084076 | 0.6519   | 0.388837 | 0.787292 | 0.933216 | 0.6994   | 0.42598  | 0.361442 |
| sp A7ZUK1 RPOB_ECO24-DNLFVR            | 0.17515  | 0.704577 | 0.11782  | 1.463436 | 0.210335 | 0.630313 | 0.134818 | 1.66261  | 2.664745 | 0.690103 | 0.081255 | 1.985866 |
| sp P0AEY0 MALE_ECO57-TWEEIPALDK        | 10.95812 | 0.8376   | 1.456853 | 0.784368 | 5.271311 | 1.0723   | 1.105613 | 0.401329 | 5.271311 | 1.153    | 0.993271 | 3.089776 |
| sp A8A750 KATG_ECOHS-AWLTHR            | 1.861211 | 0.1956   | 0.515881 | 0.223659 | 2.085428 | 0.1956   | 0.445815 | 0.232585 | 0.311789 | 1.1285   | 0.374174 | 0.227323 |
| sp P0A910 OMPA_ECOLI-IGSDAYNQGLSER     | 0.465699 | 0.3203   | 0.872202 | 0.848648 | 0.721451 | 0.7813   | 0.885128 | 0.984915 | 0.878568 | 1.0449   | 0.896108 | 0.840508 |
| sp A7ZPU1 UPP_ECO24-AGLGMMDGVLENVPSAR  | 0.918519 | 1.541705 | 1.00869  | 0.560039 | 0.632673 | 1.32     | 0.740675 | 0.556692 | 0.729695 | 1.8884   | 1.205405 | 0.501027 |
| sp B7MTW7 DADA_ECO81-TEQQYENATR        | 2.203063 | 3.217058 | 0.282537 | 0.942899 | 2.855764 | 4.8626   | 0.265393 | 1.446925 | 3.369883 | 2.8103   | 0.326241 | 0.549972 |
| sp P0A7W3 RS5_ECO57-VGFGYGK            | 12.56197 | 0.8989   | 3.145132 | 0.60737  | 0.906142 | 0.9522   | 1.876454 | 1.189398 | 0.711114 | 0.9522   | 0.898155 | 0.337496 |
| sp B7L6J2 SYT_ECO55-LSASYVGEDNER       | 0.2804   | 1.21205  | 2.013509 | 1.003643 | 0.533293 | 1.3865   | 1.274246 | 0.805101 | 0.533293 | 1.3865   | 2.648038 | 0.805101 |
| sp P0AEY0 MALE_ECO57-TAVINAASGR        | 1.91082  | 1.3037   | 1.375165 | 2.817891 | 2.126513 | 1.3037   | 1.003877 | 2.817891 | 2.029021 | 0.6488   | 1.003877 | 2.817891 |
| sp B5YXD9 ATPD_ECO5E-LADVLQS           | 0.757143 | 1.0279   | 4.421642 | 0.826248 | 2.854039 | 0.4509   | 2.708388 | 0.438698 | 2.179047 | 0.4509   | 2.708388 | 0.438698 |
| sp P27550 ACSA_ECOLI-TAIIWEGDDASQSK    | 0.285569 | 2.1649   | 0.317201 | 4.07299  | 5.996162 | 2.31215  | 1.330529 | 4.034778 | 2.63875  | 2.60105  | 1.142217 | 1.373152 |
| sp P0AFH9 OSMY_ECOL6-GVEGVTSVSDK       | 1.206843 | 1.4188   | 0.851418 | 0.447228 | 1.42656  | 1.49985  | 1.223193 | 0.680714 | 1.289712 | 1.53915  | 0.763452 | 0.95     |
| sp P63285 CLPB_ECO57-GGESVNDQGAEDQR    | 4.281982 | 1.9758   | 0.914131 | 0.687004 | 3.216684 | 1.5364   | 1.191034 | 0.750989 | 3.154628 | 1.097    | 1.257103 | 0.879735 |
| sp P0AEK2 FABG_ECOLI-AIAETLAAR         | 0.907442 | 0.1818   | 4.761945 | 0.684815 | 1.034081 | 0.1818   | 6.471374 | 1.195132 | 1.066322 | 0.44625  | 4.395115 | 0.476394 |
| sp P0AE10 AHPC_ECO57-LGVDVYAVSTDTHFTHK | 0.836951 | 0.3941   | 0.71341  | 0.280777 | 1.158381 | 0.4342   | 0.949564 | 0.562766 | 0.957629 | 0.349    | 0.876556 | 0.387838 |
| sp P0A9A7 FTSZ_ECOL6-MAFAEQGITELSK     | 0.907227 | 0.6692   | 0.468415 | 1.224668 | 0.398405 | 1.74705  | 0.366082 | 1.844419 | 1.18916  | 1.9587   | 0.501683 | 1.844419 |
| sp P77395 CNOX_ECOLI-QLYALLY           | 0.295595 | 0.83555  | 1.624003 | 0.273304 | 0.340828 | 1.5057   | 1.486413 | 0.392663 | 0.302838 | 1.5057   | 1.486413 | 0.392663 |
| sp P0A6Z5 HTPG_ECO57-LFAAAGQK          | 0.39655  | 0.921434 | 1.234315 | 1.115913 | 0.39655  | 0.3413   | 0.448873 | 0.217462 | 0.455463 | 0.3413   | 0.496074 | 0.319453 |

|                                       |          |          |          |          |          |          |          |          |          |         |          |          |
|---------------------------------------|----------|----------|----------|----------|----------|----------|----------|----------|----------|---------|----------|----------|
| sp P69778 LPP_ECO57-VDQLSNDVNAMR      | 3.561361 | 1.5911   | 1.720416 | 1.084044 | 2.232048 | 1.5911   | 1.257716 | 1.690288 | 1.517777 | 1.1631  | 1.238405 | 1.28277  |
| sp B7NER6 SECB_ECOLU-DISFEAPNAPHVFQK  | 0.600572 | 2.6906   | 2.410168 | 0.504532 | 0.605408 | 1.3236   | 2.045837 | 0.359983 | 0.952969 | 1.3236  | 1.765864 | 0.342899 |
| sp P0AC41 SDHA_ECOLI-LDHLGK           | 0.17601  | 0.682669 | 0.66647  | 0.793397 | 4.011663 | 1.0226   | 0.28055  | 1.167328 | 1.593542 | 0.90845 | 0.484319 | 0.866848 |
| sp B7UPB0 ACP_ECO27-ITTVQAAIDYINGHQA  | 0.85999  | 1.227481 | 0.697727 | 0.81239  | 0.623285 | 1.4864   | 0.493619 | 0.989602 | 0.625522 | 0.5881  | 1.0104   | 1.179953 |
| sp P36683 ACNB_ECOLI-QGLLTVEK         | 0.881863 | 2.4768   | 1.810681 | 0.280553 | 1.830766 | 2.3075   | 1.625873 | 0.460109 | 1.519185 | 2.13395 | 1.498558 | 0.646909 |
| sp A7ZNR4 GATZ_ECO24-IYDVLR           | 0.847549 | 0.8406   | 0.645092 | 0.616267 | 0.670783 | 0.676    | 0.752692 | 0.839079 | 0.568193 | 0.8406  | 0.946991 | 0.673271 |
| sp K0BE10 TAL_ECO1E-ISTEVDAR          | 0.849773 | 0.812    | 2.360755 | 0.126641 | 0.954325 | 0.812    | 2.334273 | 0.118156 | 0.811537 | 0.9563  | 2.334273 | 0.172496 |
| sp A7ZSL4 EFTU1_ECO24-HYAHVDCPGHADYVK | 0.986544 | 1.18315  | 0.832878 | 0.303166 | 1.275007 | 0.90595  | 0.67183  | 0.419209 | 1.198589 | 1.0163  | 0.930213 | 0.932333 |
| sp K0BE10 TAL_ECO1E-LTIAPTLK          | 0.49575  | 0.7291   | 0.526848 | 2.188975 | 0.991762 | 0.63285  | 1.305542 | 1.155267 | 1.084211 | 0.7291  | 0.91197  | 1.243775 |
| sp A7ZST1 PCKA_ECO24-DTFWWADK         | 1.009682 | 0.6047   | 0.704494 | 0.537886 | 0.648917 | 0.6047   | 1.150611 | 0.656449 | 0.606042 | 0.6173  | 1.299536 | 0.605622 |
| sp A7ZMI4 RL20_ECO24-AGQYAYR          | 3.749614 | 1.563573 | 0.320147 | 1.320651 | 6.441496 | 0.872172 | 0.662233 | 1.320651 | 3.28125  | 0.58035 | 0.662233 | 1.320651 |
| sp A7ZTU4 ATPB_ECO24-TIAMGSSDGLR      | 2.772151 | 1.1172   | 1.459152 | 0.575202 | 2.479624 | 1.2177   | 1.241592 | 0.459102 | 2.008139 | 1.3182  | 1.472664 | 0.753931 |
| sp B7MZ75 ENO_ECO81-DQAGIDK           | 2.182236 | 0.2156   | 8.227498 | 1.379658 | 2.804667 | 0.5619   | 1.910347 | 0.915831 | 2.444432 | 0.9082  | 1.224216 | 0.553469 |
| sp P0A6G1 CH10_ECO57-GEVLAVGNR        | 0.870932 | 0.44385  | 0.384225 | 1.497628 | 0.282678 | 0.33795  | 0.551212 | 1.877708 | 0.28304  | 0.33795 | 1.257845 | 1.496987 |
| sp K0BE10 TAL_ECO1E-FAIDQEK           | 0.567927 | 1.3802   | 0.473763 | 0.477192 | 0.827236 | 0.7539   | 0.473763 | 0.510472 | 0.961968 | 1.06705 | 0.790923 | 0.537045 |
| sp A7ZTU5 ATPG_ECO24-SWDYLYEPDPK      | 0.305805 | 1.6409   | 0.60383  | 1.569236 | 0.710801 | 1.6409   | 0.700974 | 1.569236 | 1.025021 | 2.01035 | 1.036643 | 1.569236 |
| sp A8A6H0 TNAE_ECOHS-GNFDLEGLER       | 1.188703 | 1.8067   | 1.535642 | 1.638847 | 1.179901 | 1.5853   | 1.833567 | 1.808495 | 1.179901 | 1.3626  | 1.293579 | 1.857512 |
| sp P07014 SDHB_ECOLI-LDGLSDAFSVFR     | 1.133928 | 0.9559   | 0.969716 | 0.064231 | 1.170262 | 0.9559   | 0.957212 | 0.051976 | 1.151808 | 0.9559  | 0.989932 | 0.051976 |
| sp A7ZSJ0 RL15_ECO24-VILAGEVTPVTVR    | 0.512312 | 0.775114 | 0.084642 | 0.309239 | 0.348196 | 1.1421   | 0.084642 | 0.203183 | 0.355144 | 1.1421  | 0.15425  | 0.346089 |



|                                          |          |         |          |          |          |         |          |          |          |         |          |          |
|------------------------------------------|----------|---------|----------|----------|----------|---------|----------|----------|----------|---------|----------|----------|
| sp P27302 TKT1_ECOLI-GEMPSDFDAK          | 3.364613 | 1.202   | 0.77259  | 0.489962 | 1.370875 | 1.202   | 0.700418 | 0.637597 | 0.803931 | 1.63545 | 0.71871  | 0.614312 |
| sp A8A750 KATG_ECOHS-DFVAAWVK            | 1.744499 | 0.86    | 0.385556 | 2.124109 | 6.997974 | 0.3209  | 0.560209 | 2.52911  | 0.521079 | 0.8534  | 0.345231 | 3.129451 |
| sp B1XB97 HSLU_ECODH-MQLNEELR            | 3.67133  | 2.30035 | 1.871235 | 0.532508 | 3.67133  | 2.30035 | 1.871235 | 0.532529 | 3.186381 | 2.6269  | 0.945173 | 0.804739 |
| sp P0A6F2 CARA_ECO57-LTIVPAQTS AEDVLK    | 0.928161 | 2.1739  | 1.000776 | 0.404072 | 1.273397 | 1.1672  | 0.727775 | 1.096097 | 1.10731  | 1.1463  | 0.834259 | 0.403913 |
| sp P0AGE1 SSB_ECOL6-LAEVASEYLR           | 0.531238 | 0.3982  | 0.882815 | 0.202715 | 0.555627 | 0.3982  | 0.975131 | 0.202715 | 0.673182 | 0.3982  | 1.086546 | 0.202715 |
| sp P63285 CLPB_ECO57-TIQVLQR             | 1.03561  | 2.0854  | 1.055065 | 2.299772 | 0.689061 | 1.5907  | 0.673987 | 2.155542 | 0.655223 | 1.4777  | 0.673987 | 1.634938 |
| sp P0A6Z5 HTPG_ECO57-DEVIDHLGTIAK        | 0.4571   | 0.9638  | 0.772591 | 6.897912 | 0.744452 | 0.97635 | 0.86002  | 2.18643  | 0.862251 | 0.89965 | 0.973041 | 3.366785 |
| sp P63285 CLPB_ECO57-LPQVEGTGGDVQPSQDLVR | 1.550827 | 0.9417  | 0.966714 | 0.663615 | 1.495835 | 1.0327  | 1.142306 | 0.479734 | 1.486883 | 1.0327  | 1.170827 | 0.418936 |
| sp P0AF93 RIDA_ECOLI-AIVEAAGLK           | 0.602549 | 0.9886  | 0.32991  | 0.854781 | 0.88765  | 0.9886  | 1.064988 | 0.855229 | 1.658434 | 0.88385 | 0.520129 | 0.665599 |
| sp P25516 ACNA_ECOLI-NEMVPGVEGGMTR       | 2.135735 | 0.7122  | 0.859698 | 0.141471 | 2.474049 | 0.7122  | 1.04329  | 0.098681 | 3.152702 | 0.7122  | 0.671292 | 0.09635  |
| sp P00509 AAT_ECOLI-TAQTGGTGALR          | 1.268063 | 3.1471  | 1.498247 | 0.484558 | 0.88859  | 3.1471  | 2.466652 | 0.502417 | 0.654931 | 2.0986  | 1.886549 | 0.279351 |
| sp B7UK34 RL14_ECO27-AVVVR               | 2.64818  | 0.7068  | 3.999268 | 1.078515 | 0.417237 | 0.7068  | 3.434593 | 1.301926 | 0.394888 | 0.7068  | 3.434593 | 1.299055 |
| sp P0A9G6 ACEA_ECOLI-LAADVTGVPTLLVAR     | 0.977099 | 0.83715 | 0.670164 | 0.249437 | 0.83488  | 0.9392  | 0.457953 | 0.322344 | 0.83488  | 0.8935  | 0.622798 | 0.295305 |
| sp P0ACF4 DBHB_ECOLI-IAAGADISK           | 0.804354 | 1.4357  | 1.092028 | 2.032588 | 0.737372 | 1.2679  | 1.092028 | 0.453766 | 0.902734 | 1.2945  | 0.992487 | 0.601515 |
| sp A7ZQP6 FUCI_ECO24-VQAVDMTEL R         | 0.692983 | 1.1062  | 1.155379 | 0.933976 | 0.629129 | 1.42255 | 1.029876 | 1.016609 | 0.528591 | 1.7104  | 1.263091 | 1.041521 |
| sp P00968 CARB_ECOLI-LIVIEMNPR           | 3.248588 | 1.5758  | 0.492245 | 1.316494 | 5.303115 | 1.5758  | 1.100917 | 0.628232 | 4.787898 | 1.5758  | 1.409633 | 0.628232 |
| sp A7ZTP1 IBPA_ECO24-TYLYQGIAER          | 1.260539 | 1.1874  | 1.080237 | 0.185735 | 0.926614 | 1.1874  | 1.047589 | 0.353777 | 0.823384 | 1.1874  | 0.884137 | 0.353777 |
| sp P0ABH7 CISY_ECOLI-ILILHADHEQNASTSTVR  | 1.416647 | 0.53375 | 0.403698 | 2.395251 | 1.062013 | 0.6811  | 0.403698 | 0.945848 | 0.763877 | 0.6811  | 0.343653 | 1.446807 |
| sp P0A8M1 SYN_ECOL6-LDVLDER              | 0.631897 | 1.1155  | 4.076542 | 1.019656 | 0.765848 | 1.1155  | 2.576439 | 1.912757 | 0.858329 | 1.29265 | 3.068852 | 1.902493 |

|                                        |          |          |          |          |          |          |          |          |          |          |          |          |
|----------------------------------------|----------|----------|----------|----------|----------|----------|----------|----------|----------|----------|----------|----------|
| sp B6I586 SYH_ECOSE-AIGEVTDVVEK        | 1.07364  | 0.6154   | 1.871909 | 0.225436 | 1.275126 | 0.6826   | 1.581652 | 0.224783 | 1.109017 | 0.6739   | 1.819793 | 0.250991 |
| sp B7LA26 RRAA_ECO55-ASFGGQIITVK       | 3.145454 | 0.87785  | 0.494576 | 4.39401  | 4.506934 | 0.87785  | 0.438999 | 6.888092 | 1.275971 | 0.87785  | 0.364417 | 4.39401  |
| sp A7ZST1 PCKA_ECO24-TTLSTDPK          | 0.263569 | 1.0149   | 0.342506 | 1.80824  | 0.430833 | 1.26095  | 0.729443 | 2.286026 | 1.097191 | 1.2452   | 1.071103 | 1.312291 |
| sp B5YTN8 RL2_ECO5E-ATLGEVGNAEHMLR     | 0.338858 | 1.7451   | 1.616152 | 1.930006 | 0.184248 | 0.7515   | 1.642948 | 1.930006 | 0.184248 | 0.9333   | 1.312911 | 1.917019 |
| sp A7ZJD0 GPMA_ECO24-HYGALQGLNK        | 0.147126 | 0.93998  | 0.888816 | 0.561615 | 0.076921 | 0.705046 | 0.815401 | 0.337522 | 0.076921 | 0.823124 | 1.199208 | 0.15119  |
| sp A7ZV12 CH60_ECO24-QIVLNCGEPSVVANTVK | 0.686751 | 0.8397   | 0.989042 | 0.564984 | 0.479504 | 0.7524   | 1.225227 | 1.628376 | 1.718733 | 0.6651   | 1.041037 | 1.494382 |
| sp P0AG68 RS1_ECOL6-GVVVAIDK           | 1.099533 | 0.71725  | 8.242933 | 0.73434  | 0.272098 | 0.7949   | 1.961995 | 1.035146 | 0.524267 | 0.902    | 0.623219 | 0.979617 |
| sp P0A9G6 ACEA_ECOLI-LLHGESK           | 1.60609  | 1.04404  | 0.659656 | 0.939995 | 5.621867 | 0.960888 | 0.961982 | 0.444346 | 3.753561 | 0.7547   | 1.264307 | 0.671846 |
| sp P08200 IDH_ECOLI-ADSADA EK          | 1.572222 | 1.43735  | 0.551605 | 1.245918 | 1.779698 | 1.1902   | 0.595163 | 0.769861 | 2.384761 | 1.1299   | 0.742447 | 0.837693 |
| sp Q1R626 RL18_ECOU-DVSFDR             | 3.082622 | 0.873072 | 2.70399  | 2.238526 | 3.512458 | 0.960847 | 3.147271 | 2.218487 | 5.16248  | 0.5674   | 4.881852 | 1.230543 |
| sp A7ZSJ4 RL6_ECO24-QVIGQVAADLR        | 6.142667 | 1.37625  | 1.319786 | 1.420685 | 3.632931 | 0.9451   | 1.60096  | 0.572102 | 2.199239 | 0.8943   | 1.24206  | 0.534199 |
| sp P23839 YICC_ECOLI-MQSDEGEINPVDILR   | 1.537702 | 1.586159 | 2.00035  | 4.986835 | 1.423363 | 1.703255 | 2.302544 | 3.049215 | 1.341617 | 1.653172 | 1.496184 | 2.097405 |
| sp B5Z2K8 RL9_ECO5E-DIADAVTAAGVEVAK    | 1.003834 | 1.4795   | 1.589527 | 0.92127  | 0.747401 | 1.4795   | 1.640169 | 0.47564  | 0.757931 | 1.0929   | 1.355851 | 0.751314 |
| sp P62593 BLAT_ECOLX-DAEDQLGAR         | 0.921837 | 0.6622   | 1.038978 | 0.586345 | 1.1727   | 0.4812   | 0.22731  | 0.484566 | 0.753205 | 0.4812   | 1.390109 | 0.710993 |
| sp P0ABK0 CYDA_ECOL6-DLGYGLLLK         | 0.426366 | 0.790315 | 0.923708 | 1.295554 | 0.227183 | 0.4997   | 1.411732 | 17.39821 | 0.162814 | 0.47535  | 0.56208  | 17.39821 |
| sp A1AGI6 RPOA_ECOK1-GYVPASTR          | 0.140736 | 0.843754 | 0.959044 | 0.448776 | 0.140736 | 0.855891 | 1.125866 | 0.458912 | 0.23626  | 1.067954 | 0.649489 | 0.370082 |
| sp P0A8N6 SYK2_ECO57-DSLPEGVYNDQFK     | 1.658839 | 0.8111   | 0.872202 | 0.543019 | 2.345225 | 1.27     | 0.79273  | 0.872694 | 1.241393 | 1.27     | 0.911116 | 1.093432 |
| sp A7ZSL4 EFTU1_ECO24-LLDEGR           | 0.468249 | 0.2107   | 0.775616 | 2.275822 | 0.464958 | 0.19165  | 0.192774 | 2.847374 | 0.415972 | 0.19165  | 0.775616 | 2.847374 |
| sp A7ZQ54 GRPE_ECO24-ALEVADK           | 1.360536 | 1.2579   | 0.906435 | 0.415878 | 2.001279 | 0.5331   | 1.151999 | 0.606123 | 1.664322 | 0.7681   | 1.851616 | 0.606123 |

|                                         |          |          |          |          |          |         |          |          |          |         |          |          |
|-----------------------------------------|----------|----------|----------|----------|----------|---------|----------|----------|----------|---------|----------|----------|
| sp P0AC39 ASPA_ECOL6-LVDAINQLR          | 0.839344 | 0.809862 | 0.407372 | 0.518975 | 0.870033 | 0.7054  | 0.655956 | 0.274956 | 0.563926 | 0.7054  | 0.685467 | 0.284918 |
| sp P0A9P2 DLDH_ECO57-EDGIYVTMEGK        | 2.430482 | 1.5803   | 0.968333 | 0.281526 | 1.055759 | 1.5611  | 0.606779 | 0.316979 | 0.855167 | 1.49855 | 0.806495 | 0.331198 |
| sp P0A7D6 PURA_ECO57-DPFDA              | 0.327414 | 0.659739 | 0.958262 | 0.128415 | 1.080021 | 0.25515 | 0.979454 | 0.264582 | 1.246472 | 0.6222  | 0.944956 | 0.267266 |
| sp A8A5E7 EFG_ECOHS-IGEVHDGAATMDWMEQEQR | 0.336774 | 0.5854   | 0.94245  | 1.094922 | 0.336774 | 0.5854  | 0.664728 | 1.715083 | 0.506688 | 0.5854  | 0.76517  | 1.219931 |
| sp B7UHB4 CSRA_ECO27-MLILTR             | 0.738001 | 0.623903 | 1.657997 | 0.380617 | 0.264174 | 0.4018  | 1.543276 | 1.385591 | 0.284139 | 0.86995 | 1.26658  | 2.390566 |
| sp A7ZSJ4 RL6_ECO24-LQLVGVGYR           | 0.745117 | 0.7537   | 0.341941 | 0.169964 | 0.569578 | 0.7537  | 0.402433 | 0.180611 | 1.042095 | 0.7537  | 0.094138 | 0.180611 |
| sp A1AGI6 RPOA_ECOK1-DEVILTLNK          | 1.387035 | 1.28605  | 0.846495 | 1.277732 | 1.700174 | 1.3696  | 0.868343 | 1.355678 | 1.943758 | 1.28605 | 0.956766 | 0.837433 |
| sp P04825 AMPN_ECOLI-DQEFSSDLGSR        | 1.944862 | 0.9508   | 0.472016 | 0.745583 | 1.926478 | 0.9272  | 0.577232 | 0.591233 | 1.53301  | 1.0528  | 0.605341 | 0.506019 |
| sp A7ZJA8 SUCC_ECO24-ELYLGAVVDR         | 0.680451 | 0.7782   | 1.745238 | 0.89254  | 1.072498 | 0.7782  | 1.745238 | 1.529323 | 0.949127 | 0.7782  | 1.385289 | 1.218868 |
| sp P0AGE1 SSB_ECOL6-VILVGNLQDPEVR       | 1.080782 | 0.534287 | 0.68235  | 1.642239 | 1.198778 | 0.3286  | 1.672772 | 1.435985 | 1.198778 | 0.28955 | 0.937612 | 1.69683  |
| sp B7UPB0 ACP_ECO27-IIGEQLGVK           | 0.793078 | 1.82925  | 0.054983 | 0.185859 | 0.534057 | 0.6289  | 0.345783 | 0.47765  | 0.814858 | 0.90555 | 0.557753 | 0.436404 |
| sp P63285 CLPB_ECO57-MSELQYGK           | 0.205754 | 0.6655   | 0.90103  | 1.04508  | 0.378158 | 1.2529  | 1.225589 | 1.116175 | 0.400931 | 1.32825 | 1.315124 | 1.128484 |
| sp A1AF92 GCSP_ECOK1-EETGISELDIAK       | 0.125812 | 0.8194   | 1.469883 | 2.248204 | 0.40294  | 1.8631  | 1.025703 | 1.417178 | 0.557733 | 1.8568  | 1.430627 | 1.021831 |
| sp P0A9B3 G3P_ECOL6-DGHLIVNGK           | 0.625856 | 0.4036   | 0.069163 | 0.852583 | 0.482935 | 0.2547  | 0.145298 | 0.857075 | 2.128477 | 0.2547  | 0.186758 | 0.915268 |
| sp A7ZV12 CH60_ECO24-VTLGPK             | 4.265007 | 0.891517 | 0.551787 | 1.036829 | 1.585664 | 0.75055 | 0.920982 | 1.917186 | 1.585664 | 0.8166  | 0.784928 | 2.861621 |
| sp P0A9M8 PTA_ECOLI-YQLTELAR            | 2.30979  | 1.253294 | 0.321263 | 0.598275 | 2.269325 | 1.159   | 0.557216 | 0.355931 | 1.071247 | 1.159   | 0.382998 | 0.365232 |
| sp P62593 BLAT_ECOLX-QQLIDWMEADK        | 0.926674 | 0.824    | 0.908106 | 0.506975 | 0.935942 | 0.8483  | 0.832598 | 0.585818 | 0.944593 | 0.83615 | 0.729805 | 1.276591 |
| sp P0AE10 AHPC_ECO57-NFDNMR             | 7.3537   | 0.590427 | 1.508829 | 0.558543 | 3.822571 | 0.2266  | 1.837134 | 0.533874 | 4.533504 | 0.2266  | 1.644739 | 0.533874 |
| sp B5Z2K8 RL9_ECO5E-NFLVPQGK            | 0.832491 | 0.7489   | 1.401401 | 1.589375 | 0.548195 | 0.56835 | 1.546494 | 1.625534 | 0.539341 | 0.5483  | 0.985541 | 0.796884 |

|                                           |          |          |          |          |          |         |          |          |          |         |          |          |
|-------------------------------------------|----------|----------|----------|----------|----------|---------|----------|----------|----------|---------|----------|----------|
| sp P0AEY0 MALE_ECO57-DVGVDNAGAK           | 0.591346 | 0.6971   | 2.039654 | 0.331731 | 1.292756 | 1.2549  | 1.857843 | 0.373351 | 1.519409 | 2.04175 | 1.681077 | 0.422536 |
| sp B7MYP6 RL19_ECO81-GLHSAFTVR            | 0.755253 | 1.491263 | 1.445888 | 0.400026 | 0.693489 | 1.6126  | 0.330444 | 0.385056 | 0.423245 | 1.6126  | 0.849441 | 0.286212 |
| sp P0A9G6 ACEA_ECOLI-EWTQPR               | 0.505571 | 0.4403   | 0.653952 | 0.598338 | 0.467625 | 0.4403  | 1.036296 | 0.598338 | 0.663745 | 0.4403  | 0.923601 | 0.639361 |
| sp P36683 ACNB_ECOLI-GGVSLRPGDGVHLSWLR    | 0.387062 | 1.5876   | 2.513592 | 2.214727 | 0.373739 | 1.1615  | 1.243441 | 1.608163 | 1.118931 | 1.397   | 1.043129 | 0.836569 |
| sp P37330 MASZ_ECOLI-NFDEIVHDLAPENR       | 0.581345 | 1.5493   | 0.217587 | 0.734623 | 0.870297 | 0.9203  | 0.611269 | 1.565449 | 0.870297 | 0.9203  | 1.959868 | 1.565449 |
| sp A8A5E7 EFG_ECOHS-YDEAPSNVAQAVIEAR      | 0.760661 | 0.3334   | 0.578323 | 4.112604 | 1.120634 | 0.81025 | 0.786482 | 1.420587 | 1.04596  | 0.7415  | 0.813282 | 1.362574 |
| sp A8A5E7 EFG_ECOHS-VTDVEGK               | 0.677604 | 0.73895  | 1.040021 | 0.799781 | 0.908402 | 0.91235 | 1.36863  | 0.820524 | 1.173325 | 0.91235 | 1.175809 | 0.618361 |
| sp A1AGI6 RPOA_ECOK1-GLAVR                | 0.49882  | 0.5797   | 3.566714 | 1.522098 | 0.44635  | 0.5797  | 3.183883 | 1.42345  | 0.307492 | 0.5771  | 2.488105 | 1.504357 |
| sp P0AG32 RHO_ECO57-GEVVASTFDEPAR         | 0.739066 | 1.2842   | 1.17663  | 1.552672 | 1.295357 | 1.2842  | 1.245226 | 1.552672 | 1.442114 | 1.407   | 1.082841 | 0.697373 |
| sp A7ZJA8 SUCC_ECO24-VALDPLTGMPYQGR       | 0.685357 | 0.8436   | 0.765876 | 0.555567 | 0.720461 | 1.00325 | 3.869144 | 0.446624 | 0.699858 | 0.8751  | 1.054945 | 0.48965  |
| sp P23538 PPSA_ECOLI-IEDVPQEQR            | 0.109108 | 0.3781   | 1.153899 | 1.242621 | 0.109108 | 2.2381  | 1.037329 | 1.335771 | 0.109108 | 2.2381  | 0.73015  | 0.915418 |
| sp A7ZQ54 GRPE_ECO24-AAMVTVAK             | 0.804758 | 5.2907   | 1.387915 | 0.190698 | 0.292953 | 0.7191  | 2.940341 | 0.471831 | 0.533872 | 0.5512  | 2.063682 | 0.530568 |
| sp P0A7B0 IPYR_ECO57-AEIVASFER            | 0.978097 | 0.7021   | 0.975602 | 3.91397  | 1.313828 | 2.0802  | 1.16811  | 3.91397  | 0.689417 | 0.7021  | 1.386367 | 3.388232 |
| sp P0A9S3 GATD_ECOLI-SVVNDTDGIVR          | 1.187291 | 3.4714   | 0.703277 | 1.578387 | 1.943335 | 3.4714  | 1.281771 | 1.578387 | 2.430289 | 1.24565 | 0.954037 | 2.061573 |
| sp Q1R6A9 RL13_ECOOUT-DWYVVVDATGK         | 1.444638 | 0.751    | 1.264119 | 0.719419 | 1.997516 | 0.7674  | 1.221144 | 1.083094 | 1.173594 | 0.7838  | 1.006527 | 0.555433 |
| sp P0A6Z5 HTPG_ECO57-EILQDSTVTR           | 1.129893 | 1.6864   | 1.220642 | 0.971743 | 1.189453 | 1.3005  | 1.905603 | 1.14353  | 1.256223 | 1.1548  | 2.032386 | 0.818872 |
| sp P00550 PTM3C_ECOLI-GASPLSAGDVTNDLSHVR  | 1.675858 | 0.868447 | 1.147972 | 1.500394 | 1.373025 | 0.3739  | 1.136569 | 2.086294 | 1.610334 | 0.3739  | 1.643317 | 2.143125 |
| sp P0A6Y9 DNAK_ECOL6-QVEEAGDK             | 0.866654 | 0.7333   | 1.653532 | 0.902954 | 0.84232  | 0.8407  | 1.092494 | 0.942609 | 0.869672 | 1.0156  | 1.337289 | 0.976737 |
| sp P0A802 RPOZ_ECO57-QEQEQEAAELQAVTAIAEGR | 1.424784 | 1.912546 | 1.01604  | 0.415649 | 0.498093 | 1.7782  | 1.497639 | 0.386027 | 0.938956 | 3.76685 | 1.442796 | 0.688086 |

|                                       |          |          |          |          |          |          |          |          |          |         |          |          |
|---------------------------------------|----------|----------|----------|----------|----------|----------|----------|----------|----------|---------|----------|----------|
| sp P68206 YJBJ_ECOLI-DEAGGNWK         | 0.368839 | 1.099121 | 0.745909 | 1.526923 | 2.599753 | 0.6264   | 0.431264 | 1.526923 | 0.903726 | 0.8509  | 0.727245 | 2.379133 |
| sp A1AIG0 RPOC_ECOK1-GDVISDGPEAPHDILR | 0.884969 | 1.2361   | 0.875753 | 2.113048 | 2.014426 | 1.13035  | 0.913444 | 1.105042 | 1.364633 | 1.13035 | 0.944307 | 1.324238 |
| sp P31979 NUOF_ECOLI-NPGLWELPFGTTAR   | 1.395738 | 0.8296   | 1.326871 | 0.222524 | 1.587898 | 0.8296   | 1.423085 | 0.383247 | 1.40999  | 0.9023  | 1.4198   | 0.372205 |
| sp P0AG32 RHO_ECO57-AYNTVVPASGK       | 0.282966 | 1.2076   | 1.232055 | 0.665039 | 0.929991 | 1.17605  | 0.942726 | 0.364227 | 1.037482 | 1.17605 | 1.054969 | 0.426835 |
| sp P0AEU7 SKP_ECOLI-DITADVLC          | 1.286349 | 1.1295   | 2.314837 | 1.433282 | 1.024864 | 0.85295  | 1.233434 | 1.154604 | 1.189253 | 0.95815 | 1.25039  | 1.219591 |
| sp P0A7B0 IPYR_ECO57-VEGWENAEAAK      | 0.197539 | 1.4389   | 2.371794 | 0.773756 | 2.291644 | 1.51085  | 2.634109 | 0.467143 | 0.952441 | 1.2452  | 2.274117 | 0.798295 |
| sp P0A9Y7 CSPC_ECOL6-WFNESK           | 1.04937  | 0.574582 | 1.256495 | 0.416337 | 0.73299  | 0.489013 | 0.901866 | 0.47731  | 0.955896 | 0.5514  | 0.694669 | 0.779548 |
| sp P0ACJ1 LRP_ECOL6-NILNELQK          | 3.567652 | 0.71855  | 1.261642 | 0.143964 | 4.293935 | 0.852    | 0.727677 | 0.611933 | 4.092796 | 0.73155 | 1.012329 | 0.300899 |
| sp P0A910 OMPA_ECOLI-DVVTQPQA         | 2.154251 | 0.2114   | 0.432606 | 0.312844 | 1.405582 | 1.2282   | 1.044787 | 1.704128 | 1.258027 | 1.205   | 1.00885  | 1.774859 |
| sp B1IQV7 PNP_ECOLC-VTDYLMGQEVVK      | 0.391275 | 0.5917   | 0.234284 | 1.294863 | 0.554427 | 0.6117   | 0.500886 | 0.949963 | 0.806074 | 0.6347  | 0.490828 | 0.949963 |
| sp B1IU2 SYA_ECOLC-GLALLDEELAK        | 0.706427 | 0.62095  | 0.781658 | 0.457341 | 0.92055  | 0.62095  | 0.704093 | 0.442814 | 1.187465 | 0.62095 | 0.759306 | 0.716996 |
| sp P00968 CARB_ECOLI-NASMAVLR         | 2.572255 | 1.018866 | 0.977187 | 0.064598 | 1.696844 | 1.0869   | 0.308943 | 0.051587 | 1.696844 | 1.0869  | 0.308943 | 0.064598 |
| sp P08839 PT1_ECOLI-VLGFITDAGGR       | 2.293566 | 0.65785  | 3.822976 | 0.417279 | 2.745957 | 0.9448   | 1.268979 | 1.227782 | 1.796914 | 0.9705  | 1.076587 | 1.904276 |
| sp A8A6H0 TNAE_ECOHS-SYYALAESVK       | 0.743833 | 0.8205   | 0.369737 | 0.497005 | 0.6242   | 0.8205   | 0.552419 | 0.493207 | 0.533738 | 0.8414  | 0.604301 | 0.604472 |
| sp A1AGC3 RS9_ECOK1-SLEQYFGR          | 0.379611 | 2.692811 | 2.264838 | 1.473432 | 0.581155 | 2.93945  | 19.28064 | 1.285489 | 0.589699 | 2.6703  | 4.166111 | 1.475057 |
| sp B7MIX0 RL1_ECO45-GLMPNPK           | 1.069999 | 0.97645  | 0.702882 | 0.682736 | 1.070221 | 0.9996   | 1.205051 | 0.654329 | 0.668548 | 1.0535  | 1.026938 | 0.560299 |
| sp B7UJP9 YAIQ_ECO27-NAVDNASR         | 0.145078 | 1.85695  | 0.156056 | 0.308755 | 0.146271 | 1.85695  | 0.156056 | 0.538993 | 0.193286 | 1.85695 | 0.334191 | 0.767864 |
| sp A7ZNR4 GATZ_ECO24-DHFAILK          | 0.183501 | 0.52     | 1.850477 | 1.717945 | 0.653393 | 0.52     | 1.850477 | 0.806662 | 1.186579 | 0.52    | 2.014887 | 0.743558 |
| sp A8A6H0 TNAE_ECOHS-EAFDTGVR         | 0.521034 | 1.3491   | 1        | 1.378406 | 0.521034 | 1.3491   | 1        | 1.180983 | 0.521034 | 1.3491  | 1        | 1.136675 |

|                                        |          |          |          |          |          |          |          |          |          |          |          |          |
|----------------------------------------|----------|----------|----------|----------|----------|----------|----------|----------|----------|----------|----------|----------|
| sp B7UK34 RL14_ECO27-IISLAPEVL         | 0.60818  | 2.1776   | 1.282138 | 0.082938 | 0.60818  | 2.1776   | 1.282138 | 0.230527 | 1.085034 | 1.5711   | 1.293161 | 0.225544 |
| sp P63285 CLPB_ECO57-VIGQNEAVDAVSNAIR  | 2.32569  | 0.4517   | 0.851774 | 1.465557 | 1.655422 | 0.5929   | 1.066449 | 0.861493 | 1.047706 | 0.62785  | 0.99014  | 0.856536 |
| sp B1X8H5 SYGB_ECODH-VIADYEER          | 1.02414  | 0.831033 | 1.322489 | 0.127791 | 1.41723  | 0.749006 | 0.944399 | 0.121558 | 0.706217 | 0.888039 | 0.483434 | 0.074716 |
| sp P06959 ODP2_ECOLI-SEFAENDAYVHATPLIR | 2.012665 | 0.7227   | 0.22207  | 1.803758 | 1.39942  | 0.9209   | 0.386978 | 1.336467 | 1.362825 | 1.32275  | 0.386978 | 1.053496 |
| sp P06959 ODP2_ECOLI-TDITELEAFR        | 1.634043 | 1.567013 | 2.18481  | 0.518133 | 1.729368 | 1.844    | 1.670365 | 0.717088 | 1.709435 | 1.844    | 1.278735 | 1.164073 |
| sp A8A5E7 EFG_ECOHS-AKPVLLPEIMK        | 2.262461 | 0.893598 | 0.101239 | 2.342431 | 2.920219 | 1.5732   | 0.173898 | 0.801114 | 2.988798 | 0.98725  | 0.173898 | 0.81896  |
| sp P0A9M8 PTA_ECOLI-TGGDAPDQTTTIVR     | 1.124551 | 1.9853   | 0.899354 | 0.520195 | 0.944353 | 1.9853   | 0.955038 | 0.514204 | 1.156863 | 1.5895   | 0.923186 | 0.485984 |
| sp A1A9Q9 NQOR_ECOK1-VDGAEVVVK         | 2.264364 | 0.4574   | 0.583799 | 1.310984 | 0.889197 | 0.4574   | 1.687988 | 1.656923 | 1.256718 | 0.4574   | 1.687988 | 0.751523 |
| sp P0AA18 OMPR_ECO57-ALVSHPR           | 2.686051 | 0.6005   | 3.408693 | 3.284065 | 2.817092 | 0.7695   | 2.733462 | 1.044326 | 2.817092 | 0.7695   | 1.955553 | 0.843672 |
| sp A7ZV12 CH60_ECO24-QQIEEATSDYDR      | 2.369939 | 0.3356   | 0.548811 | 2.790276 | 1.302682 | 0.6261   | 0.482109 | 2.16333  | 0.70431  | 1.0997   | 0.469808 | 1.538021 |
| sp P0A7W0 RS4_ECO57-IEQAPGQHGAR        | 1.158083 | 0.6221   | 1.266728 | 1.237464 | 1.207927 | 0.953    | 0.934748 | 0.326832 | 1.028013 | 1.1351   | 1.129975 | 0.722338 |
| sp P0A9L3 FKBB_ECOLI-VINQGEAIPAR       | 0.823388 | 0.5748   | 0.721865 | 0.339242 | 0.783905 | 0.7734   | 0.687839 | 0.349041 | 1.402876 | 0.84795  | 0.646127 | 0.347007 |
| sp P06959 ODP2_ECOLI-FNSSLSEDGQR       | 0.938955 | 1.70775  | 0.542749 | 4.434337 | 0.754672 | 1.3147   | 1.187456 | 2.760954 | 0.478926 | 1.3147   | 0.864976 | 2.697465 |
| sp P0AFG9 ODP1_ECO57-TFGMEGLFR         | 1.090519 | 0.3574   | 0.76611  | 1.354562 | 1.08953  | 0.4634   | 0.597896 | 1.580487 | 1.056017 | 0.5563   | 0.811474 | 1.35492  |
| sp P28904 TREC_ECOLI-SFQDTTGS GTGDLR   | 0.868853 | 0.6723   | 2.155972 | 0.209798 | 0.982385 | 0.6723   | 1.29136  | 0.308851 | 1.726217 | 0.9299   | 1.547794 | 0.388566 |
| sp P0A9K5 PHOL_ECO57-LGFLPGDLSQK       | 0.78342  | 1.25895  | 1.14713  | 0.412808 | 1.045362 | 1.2654   | 0.841698 | 0.823848 | 0.741983 | 1.25895  | 1.34348  | 2.350474 |
| sp P0A9Q3 ARCA_ECO57-TMNLGTVSEER       | 0.96332  | 1.1059   | 1.317452 | 1.042138 | 0.628092 | 1.8753   | 1.478019 | 1.678267 | 0.708248 | 1.8753   | 1.517526 | 1.301347 |
| sp P0AB55 YCII_ECOLI-LQLLHDEGR         | 2.760381 | 0.1084   | 0.932831 | 1.539399 | 2.806597 | 0.4046   | 0.536745 | 2.148496 | 2.806597 | 0.4046   | 0.521036 | 1.654932 |
| sp B7N1C2 RS7_ECO81-FVNILMVDGK         | 0.476174 | 0.5484   | 0.855154 | 0.624327 | 0.947418 | 0.6319   | 1.071616 | 0.272958 | 0.850941 | 1.90835  | 1.092528 | 0.325661 |

|                                            |          |          |          |          |          |          |          |          |          |         |          |          |
|--------------------------------------------|----------|----------|----------|----------|----------|----------|----------|----------|----------|---------|----------|----------|
| sp A8A466 PGK_ECOHS-ASLPTIELALK            | 1.09633  | 4.3008   | 0.751858 | 1.763006 | 2.606351 | 4.3008   | 0.751858 | 1.270303 | 1.782959 | 3.4719  | 0.797799 | 2.107745 |
| sp P15288 PEPD_ECOLI-EAVPAGFETFK           | 1.378967 | 2.0635   | 0.923707 | 1.175819 | 1.211119 | 1.9216   | 0.798805 | 1.02789  | 1.256608 | 1.81455 | 1.084274 | 0.677661 |
| sp P0ADZ2 RL23_ECO57-AYVTLK                | 0.993271 | 0.1291   | 0.739796 | 0.722526 | 0.939437 | 0.3947   | 1.120408 | 0.704277 | 0.924358 | 0.1741  | 0.592759 | 1.028147 |
| sp A7ZST1 PCKA_ECO24-DALLENVTVR            | 2.58272  | 0.52013  | 1.024802 | 6.999036 | 1.566576 | 0.6925   | 0.851287 | 4.078543 | 1.575598 | 0.5907  | 1.10607  | 2.013694 |
| sp P36683 ACNB_ECOLI-EGIEPDQPGVVGPIK       | 2.182444 | 1.2521   | 0.230335 | 1.140251 | 1.845734 | 1.3692   | 1.177315 | 0.699378 | 1.772421 | 1.3692  | 0.676129 | 0.569358 |
| sp P00350 6PGD_ECOLI-AAVLPANLIQAQR         | 1.027932 | 0.4284   | 1.156103 | 0.53998  | 0.40738  | 0.6035   | 1.138721 | 1.124877 | 1.799832 | 0.87835 | 1.667094 | 0.891937 |
| sp P0A9Q7 ADHE_ECOLI-GSLPIALDEVITDGHK      | 0.477761 | 1.6078   | 0.975158 | 0.265781 | 0.37535  | 2.05245  | 0.649208 | 0.812506 | 0.574056 | 2.1229  | 0.934525 | 0.716998 |
| sp A1AIG0 RPOC_ECOK1-DLLGITK               | 0.032585 | 0.556985 | 3.156943 | 0.355216 | 0.084094 | 0.34125  | 1.957176 | 0.426745 | 0.078079 | 0.34125 | 1.957176 | 0.710781 |
| sp P0A6Y9 DNAK_ECOL6-TTPSIIAYTQDGETLVGQPAK | 0.461076 | 1.26055  | 2.974111 | 1.10305  | 0.687818 | 1.2988   | 2.543705 | 0.746094 | 0.632532 | 1.26055 | 1.77962  | 0.909839 |
| sp P23538 PPSA_ECOLI-DSGVVSELFDER          | 2.825617 | 0.6961   | 1.303133 | 5.277929 | 1.349311 | 0.97125  | 0.987417 | 0.519925 | 1.195052 | 0.6961  | 0.264465 | 0.520321 |
| sp P0ACA3 SSPA_ECOLI-LPQLGIEFSGPGAK        | 0.584794 | 1.467606 | 0.626343 | 4.366706 | 0.584794 | 1.357997 | 0.626343 | 4.366706 | 1.019367 | 1.5378  | 1.11279  | 3.998418 |
| sp B1LNK7 GLYA_ECOSM-EAMEPEFK              | 1.037985 | 1.312    | 1.34063  | 0.860514 | 1.218528 | 1.1784   | 1.371979 | 1.122836 | 1.225402 | 1.4922  | 1.260373 | 1.12688  |
| sp P0AG68 RS1_ECOL6-YPEGTK                 | 1.846139 | 0.4155   | 0.988469 | 1.543544 | 1.513093 | 0.454    | 0.553465 | 1.916802 | 1.89986  | 0.7671  | 3.938963 | 0.683333 |
| sp A7ZTU4 ATPB_ECO24-YTLAGTEVSALLGR        | 0.842333 | 1.1668   | 0.715883 | 2.404895 | 0.834197 | 1.1274   | 0.617681 | 1.186267 | 0.741397 | 1.0008  | 0.668608 | 1.176713 |
| sp P0A9B3 G3P_ECOL6-YDSTHGR                | 1.158257 | 2.799063 | 0.870882 | 0.990908 | 1.326965 | 2.8676   | 0.968533 | 1.011412 | 1.326965 | 2.8676  | 0.606107 | 1.354499 |
| sp Q0TCG3 RS13_ECOL5-IAGINIPDHK            | 0.757969 | 0.579    | 1.541905 | 4.653247 | 1.046298 | 0.579    | 1.518828 | 1.752161 | 0.990482 | 0.9727  | 1.226716 | 1.221306 |
| sp A7ZSD0 MDH_ECO24-IQNAGTEVVEAK           | 1.516008 | 0.66775  | 0.954727 | 0.371361 | 1.396511 | 0.8102   | 0.902931 | 0.441094 | 1.312332 | 0.9054  | 1.098047 | 0.423397 |
| sp P0A3B2 TYPA_ECO27-INIVDTPGHADFGGEVER    | 1.670649 | 3.4587   | 1.669246 | 0.553493 | 2.790954 | 2.078    | 0.644782 | 0.556401 | 3.945114 | 2.078   | 0.984017 | 0.60834  |
| sp P0ACD5 ISCU_ECOL6-VNDEGIIEDAR           | 2.027333 | 0.39175  | 1.393792 | 2.274474 | 1.661698 | 0.39175  | 1.100302 | 1.352278 | 1.54018  | 0.5456  | 0.908949 | 1.084611 |

|                                           |          |          |          |          |          |         |          |          |          |         |          |          |
|-------------------------------------------|----------|----------|----------|----------|----------|---------|----------|----------|----------|---------|----------|----------|
| sp P0ABK0 CYDA_ECOL6-AYSLLEQLR            | 3.329215 | 1.7729   | 0.304478 | 0.111647 | 2.626972 | 1.7729  | 0.304478 | 0.1071   | 2.525041 | 1.7729  | 0.304478 | 0.106856 |
| sp A7ZV12 CH60_ECO24-VEDALHATR            | 0.75302  | 0.5385   | 1.742447 | 1.414114 | 0.775234 | 0.5385  | 1.747664 | 2.091963 | 0.775234 | 0.5385  | 1.545351 | 2.294509 |
| sp P0A9P2 DLDH_ECO57-IWDSTDALELK          | 1.406452 | 1.14095  | 0.810863 | 0.488656 | 0.794485 | 1.17575 | 0.95254  | 1.129699 | 0.613827 | 1.17575 | 1.211189 | 0.93338  |
| sp A1AGI6 RPOA_ECOK1-AEAIHYIGDLVQR        | 1.085816 | 0.4807   | 2.371134 | 3.29547  | 0.173783 | 0.4807  | 2.922484 | 2.641899 | 0.441711 | 0.40015 | 2.562695 | 2.673576 |
| sp P36683 ACNB_ECOLI-DVAESDR              | 0.931267 | 0.6197   | 0.509077 | 2.088884 | 0.734972 | 0.6197  | 0.314356 | 2.396131 | 4.355995 | 0.6594  | 1.005286 | 2.019244 |
| sp B7NF50 ATPA_ECOLU-GYLADVELSK           | 0.737412 | 0.9541   | 1.089088 | 1.413389 | 0.944182 | 1.2069  | 1.070474 | 2.039916 | 0.764137 | 1.1935  | 0.695973 | 1.76489  |
| sp B1LL63 ATPF_ECOSM-AEAQVIEQANK          | 0.318288 | 0.8577   | 1.244123 | 2.650502 | 0.564449 | 0.6474  | 0.932614 | 1.493384 | 1.244363 | 0.61735 | 1.377449 | 1.597897 |
| sp B1XB97 HSLU_ECODH-EVDSIIR              | 0.60303  | 0.994855 | 2.81283  | 0.403703 | 0.850025 | 1.01775 | 2.352775 | 0.774371 | 0.850025 | 1.01775 | 0.618738 | 0.995624 |
| sp P0A807 RRF_ECO57-SMSPAWEK              | 2.145731 | 0.6641   | 2.121011 | 0.852605 | 2.169237 | 0.76595 | 0.712244 | 0.343669 | 1.22802  | 0.76595 | 1.347459 | 0.282101 |
| sp P63285 CLPB_ECO57-TAIVEGLAQR           | 0.936079 | 1.259959 | 0.102451 | 0.340264 | 0.639459 | 1.3867  | 0.102451 | 0.587164 | 0.670966 | 1.3867  | 0.223189 | 0.587164 |
| sp B1LNK7 GLYA_ECOSM-YAEGYPGK             | 0.314337 | 0.83     | 1.54832  | 0.728954 | 0.451362 | 0.80965 | 1.168186 | 0.295364 | 0.522902 | 0.8731  | 1.288203 | 0.38404  |
| sp B7LA23 GLPK_ECO55-DVLEAMQADSGIR        | 0.861446 | 1.1599   | 1.83069  | 0.357665 | 1.444433 | 0.8448  | 1.215282 | 0.540082 | 1.444433 | 0.7954  | 1.199708 | 0.533719 |
| sp B1X8W6 ARNB_ECODH-DALMEALK             | 1.441749 | 0.2935   | 0.782115 | 0.53489  | 1.366033 | 0.4415  | 0.661622 | 0.500331 | 2.590679 | 0.4415  | 0.715419 | 0.613861 |
| sp P62593 BLAT_ECOLX-VLLCGAVLSR           | 1.831715 | 1.645614 | 1.62307  | 0.640992 | 1.817076 | 0.9017  | 2.776306 | 0.533786 | 1.493792 | 0.9017  | 1.467668 | 0.492447 |
| sp Q19NJ4 CH602_ECOK1-VEDALHATR           | 0.75302  | 0.5385   | 1.742447 | 1.414114 | 0.775234 | 0.5385  | 1.747664 | 2.091963 | 0.775234 | 0.5385  | 1.545351 | 2.294509 |
| sp P0A9B3 G3P_ECOL6-DNTPMFVK              | 5.236669 | 0.5406   | 1.134134 | 1.234468 | 2.382036 | 0.6279  | 0.381993 | 1.462128 | 1.513441 | 0.74375 | 0.811788 | 0.335889 |
| sp P0ABQ2 GARR_ECOLI-NPEAIADVIAAGAETASTAK | 1.390165 | 3.2993   | 0.868864 | 0.673052 | 1.591884 | 3.11165 | 0.63653  | 0.694173 | 1.735691 | 3.11165 | 0.927893 | 0.745576 |
| sp A8A6H0 TNAE_ECOHS-VIEPVK               | 2.193186 | 1.1218   | 0.93588  | 1.164165 | 1.455774 | 0.7865  | 0.905564 | 1.154499 | 0.858022 | 0.7865  | 0.694444 | 1.218731 |
| sp P13035 GLPD_ECOLI-GLVNATGPWVK          | 2.599021 | 1.2248   | 1.125951 | 1.76932  | 2.852368 | 1.2248  | 3.121382 | 1.76932  | 2.867364 | 1.3763  | 2.842023 | 1.9271   |



|                                      |          |          |          |          |          |          |          |          |          |         |          |          |
|--------------------------------------|----------|----------|----------|----------|----------|----------|----------|----------|----------|---------|----------|----------|
| sp P0A7V4 RS3_ECOL6-LGGAEIAR         | 2.238356 | 0.969586 | 2.702004 | 0.473981 | 0.769527 | 0.9177   | 3.20466  | 0.517353 | 0.687414 | 0.9177  | 1.558535 | 0.193533 |
| sp A7ZIN4 KAD_ECO24-IAQEDCR          | 0.451598 | 0.927142 | 0.930282 | 2.862762 | 0.391459 | 0.854145 | 1.019754 | 3.471479 | 0.257188 | 0.7664  | 1.123831 | 4.708042 |
| sp A7ZR7U RS21_ECO24-ENEPFDVALR      | 1.374976 | 1.39405  | 1.185988 | 1.585668 | 1.4117   | 2.5026   | 1.384507 | 1.927169 | 1.577777 | 1.8152  | 1.433575 | 1.677211 |
| sp B5Z3U4 TIG_ECO5E-NFIDAIIK         | 0.300212 | 0.25155  | 1.118582 | 0.494055 | 0.436449 | 0.3297   | 0.842932 | 0.494055 | 0.436449 | 0.3297  | 1.824297 | 0.801455 |
| sp P27550 ACSA_ECOLI-LGTAEIESALVAHPK | 7.482448 | 1.3153   | 0.420939 | 0.829716 | 6.583862 | 1.25155  | 0.420939 | 0.892789 | 3.496326 | 1.3153  | 0.774678 | 0.615517 |
| sp B5Z0E9 EFTS_ECO5E-GADEELVK        | 0.512946 | 0.9999   | 4.596837 | 0.787847 | 1.164194 | 0.9609   | 1.742258 | 0.787847 | 1.211501 | 0.996   | 1.37586  | 0.821909 |
| sp P0A7W3 RS5_ECO57-EVPAAIQK         | 1.773641 | 1.1314   | 1.5463   | 0.431988 | 1.190656 | 1.1314   | 1.5463   | 0.616737 | 1.052886 | 1.22375 | 1.332388 | 0.793181 |
| sp A8A750 KATG_ECOHS-ELFEGR          | 0.355144 | 1.1316   | 0.378395 | 0.442629 | 0.336236 | 1.1774   | 0.416156 | 0.468001 | 1.298561 | 1.1774  | 0.298447 | 0.498981 |
| sp A7ZSK4 RL22_ECO24-AAVLVK          | 1.031262 | 1.578389 | 2.319873 | 2.564777 | 0.32084  | 1.8603   | 5.515743 | 1.413991 | 0.658143 | 1.8603  | 1.753683 | 0.847673 |
| sp P0A910 OMPA_ECOLI-SDVLFNFNK       | 0.293808 | 1.9526   | 1.729678 | 1.597567 | 0.346068 | 0.7952   | 1.723729 | 0.621741 | 0.522229 | 0.75035 | 1.512162 | 0.523401 |
| sp P23843 OPPA_ECOLI-LTQPEWFGWSQEK   | 1.346459 | 0.6001   | 0.482815 | 0.181625 | 0.649959 | 0.8256   | 1.023144 | 0.181625 | 1.367935 | 1.00345 | 1.210294 | 0.300575 |
| sp A8A4Y7 ASSY_ECOHS-NLDITDTR        | 1.381665 | 1.073526 | 3.15554  | 0.227191 | 1.076173 | 1.154662 | 2.571541 | 0.464565 | 1.533751 | 1.09839 | 1.321878 | 1.287482 |
| sp P69223 IF1_ECOL6-VTVELTPYDLSK     | 1.28998  | 0.5287   | 0.358588 | 3.734043 | 2.395679 | 0.5287   | 0.730361 | 4.389097 | 1.626407 | 0.7043  | 0.396417 | 1.108332 |
| sp P0AB78 KBL_ECO57-GEFYQQLTNDLETAR  | 0.74761  | 1.1389   | 0.790994 | 0.702492 | 0.257585 | 1.1389   | 0.961685 | 1.238577 | 0.257585 | 1.1312  | 0.680942 | 2.128023 |
| sp Q19NJ4 CH602_ECOK1-GVNVLANAVK     | 1.456934 | 1.4366   | 0.583755 | 2.597234 | 1.035667 | 0.6028   | 0.70733  | 0.446627 | 1.342234 | 0.568   | 0.726782 | 0.455163 |
| sp P31979 NUOF_ECOLI-ALTGLSPDEIVNQVK | 1.376799 | 1.4399   | 0.611592 | 0.613936 | 1.376799 | 1.4399   | 0.513445 | 0.840042 | 0.884122 | 1.4399  | 0.700745 | 0.309095 |
| sp Q19NJ4 CH602_ECOK1-FENMGAQMVK     | 1.841082 | 3.713    | 0.497005 | 0.759933 | 1.229874 | 1.1553   | 0.519894 | 1.288977 | 1.458292 | 1.1553  | 0.402558 | 1.005251 |
| sp P25553 ALDA_ECOLI-IPDQAEDAR       | 0.212825 | 0.8913   | 0.381951 | 3.525403 | 1.785969 | 0.8913   | 0.381951 | 1.072265 | 2.12365  | 0.6114  | 0.610775 | 0.985431 |
| sp P0A9A7 FTSZ_ECOL6-EPDYLDIPAFLR    | 2.473916 | 1.3866   | 1.42519  | 0.349621 | 1.408189 | 1.218    | 1.217724 | 0.259439 | 1.613137 | 0.95915 | 1.399122 | 0.29153  |

|                                    |          |          |          |          |          |          |          |          |          |         |          |          |
|------------------------------------|----------|----------|----------|----------|----------|----------|----------|----------|----------|---------|----------|----------|
| sp P31979 NUOF_ECOLI-GGAGFSTGLK    | 2.784944 | 2.6012   | 1.703161 | 0.352136 | 4.344987 | 1.2795   | 2.048328 | 0.435986 | 1.757217 | 1.24945 | 1.685404 | 0.441183 |
| sp P63285 CLPB_ECO57-VLNLCDK       | 1.542821 | 1.0751   | 8.033347 | 1.243333 | 1.546406 | 1.0751   | 8.033347 | 1.243333 | 0.409157 | 1.1572  | 1.177892 | 0.525088 |
| sp B1LPI9 G6PI_ECOSM-EVVEQEYR      | 7.233746 | 0.7188   | 1.240728 | 2.06565  | 5.261605 | 0.7188   | 1.266079 | 2.630307 | 0.825946 | 0.4317  | 1.680421 | 2.630307 |
| sp B7MNJ0 DEOB_ECO45-YFGTSDMEYGK   | 2.048722 | 1.978915 | 7.487921 | 0.444849 | 2.093041 | 1.562162 | 7.487921 | 0.894824 | 1.098042 | 1.5342  | 1.891388 | 0.800151 |
| sp P00968 CARB_ECOLI-AIEDSR        | 1.66034  | 1.7527   | 1.862539 | 3.866925 | 1.78798  | 1.7527   | 7.33139  | 3.866925 | 3.820077 | 1.7527  | 7.33139  | 3.866925 |
| sp P0A9P2 DLDH_ECO57-VTAVEAK       | 1.106378 | 1.0606   | 1.522745 | 1.57465  | 0.797665 | 1.26365  | 1.556648 | 1.78152  | 1.822491 | 1.2862  | 1.243725 | 1.640166 |
| sp A8A5E7 EFG_ECOHS-GIQEQLK        | 0.567462 | 1.03105  | 11.33371 | 0.587868 | 1.365078 | 0.5015   | 10.10184 | 0.417313 | 0.380841 | 1.103   | 8.187101 | 0.642901 |
| sp P00968 CARB_ECOLI-AMEIVYDEADLR  | 1.007446 | 0.8421   | 1.216273 | 1.199365 | 0.823358 | 1.1973   | 1.152771 | 1.204399 | 0.792335 | 1.2379  | 1.152771 | 1.095483 |
| sp P0A9B3 G3P_ECOL6-TVDGPSHK       | 1.080586 | 4.5261   | 2.826801 | 0.724077 | 1.080009 | 4.00195  | 2.1621   | 0.654079 | 1.073265 | 3.4778  | 2.444989 | 0.627159 |
| sp P25553 ALDA_ECOLI-AIVDSR        | 3.616682 | 1.758271 | 1.29999  | 0.97677  | 3.348143 | 1.558122 | 1.140078 | 1.579985 | 1.998274 | 1.8774  | 1.140078 | 1.799473 |
| sp P31979 NUOF_ECOLI-QPVWLDEYR     | 0.731719 | 0.5702   | 0.819474 | 0.059994 | 8.393612 | 1.09925  | 1.940095 | 0.614417 | 6.981503 | 0.5702  | 5.115135 | 0.614417 |
| sp P0AC39 ASPA_ECOL6-ISDIPEFVR     | 0.826288 | 1.755157 | 2.860685 | 0.583956 | 0.354022 | 1.9835   | 2.973378 | 1.026067 | 0.465503 | 1.7943  | 4.255227 | 1.026067 |
| sp A7ZJA8 SUCC_ECO24-LGADGNALFR    | 0.206076 | 0.23795  | 2.924211 | 4.335252 | 0.595273 | 0.23795  | 3.494464 | 4.54317  | 0.679843 | 0.2897  | 3.061894 | 1.516162 |
| sp P0AC41 SDHA_ECOLI-LDDTSSEFNTQR  | 1.409527 | 2.228762 | 0.563651 | 0.427493 | 1.194024 | 2.370706 | 0.546321 | 0.39271  | 1.796355 | 3.19015 | 1.183053 | 0.411924 |
| sp B1LNK7 GLYA_ECOSM-NSVPNDPK      | 1.763104 | 1.4136   | 1.06556  | 0.366075 | 1.549122 | 1.7199   | 1.099529 | 0.380261 | 1.495455 | 1.7199  | 1.038236 | 0.316616 |
| sp A7ZUK1 RPOB_ECO24-LGDLPTSGQIR   | 1.083638 | 1.0465   | 0.622049 | 0.374576 | 0.981984 | 0.71335  | 0.661817 | 0.449891 | 0.794321 | 0.5885  | 1.063248 | 0.374576 |
| sp P0A6F2 CARA_ECO57-NTEDLSSYLK    | 0.776383 | 0.8107   | 0.411329 | 1.443041 | 1.662918 | 0.8107   | 0.707857 | 0.902676 | 1.612172 | 0.8107  | 0.707857 | 0.467906 |
| sp B1IQH7 YAEH_ECOLC-ILDDL         | 0.974507 | 0.82453  | 1.428584 | 0.209024 | 1.481878 | 0.5507   | 1.647853 | 0.119503 | 1.749477 | 0.5701  | 1.732515 | 0.222577 |
| sp P0AG61 RS14_ECO57-AIISDVNASDEDR | 1.447546 | 0.89645  | 1.005955 | 0.881878 | 1.447546 | 0.89645  | 1.005955 | 0.881878 | 1.443167 | 0.8337  | 0.986821 | 0.566051 |

|                                       |          |          |          |          |          |          |          |          |          |         |          |          |
|---------------------------------------|----------|----------|----------|----------|----------|----------|----------|----------|----------|---------|----------|----------|
| sp Q8FB69 PUR2_ECOL6-FGDPETQPIMLR     | 1.225353 | 2.7749   | 1.085042 | 0.952781 | 2.018046 | 2.634    | 1.060614 | 0.705298 | 2.480182 | 2.7749  | 1.060614 | 0.506809 |
| sp P0AGF0 SUCD_ECOL6-MVGGVTPGK        | 0.999412 | 1.41745  | 0.958449 | 0.432288 | 0.749881 | 0.8943   | 0.383578 | 0.511579 | 0.914483 | 0.9903  | 0.659195 | 0.51778  |
| sp B7MZ75 ENO_ECO81-VLGDK             | 2.231844 | 0.4052   | 0.58321  | 0.920009 | 1.031796 | 0.4516   | 0.730476 | 0.815179 | 1.1946   | 0.58975 | 0.771448 | 0.64913  |
| sp A7ZV12 CH60_ECO24-AMEAPLR          | 0.890598 | 1.178748 | 1.36816  | 1.514474 | 0.890598 | 1.342847 | 1.452059 | 1.43155  | 0.590703 | 1.7033  | 0.542708 | 1.863168 |
| sp A1A9Q9 NQOR_ECOK1-YQGEYVAGLAVK     | 0.314458 | 0.806463 | 0.873487 | 4.306694 | 0.413571 | 0.9641   | 0.598615 | 3.135054 | 2.518026 | 0.7427  | 1.092484 | 3.135054 |
| sp B7MZ75 ENO_ECO81-AAGYELGK          | 0.279542 | 1.2426   | 0.675394 | 2.069198 | 0.956339 | 1.2708   | 0.783586 | 1.756381 | 0.956339 | 1.10555 | 0.844126 | 0.883852 |
| sp P0AFH9 OSMY_ECOL6-LLADDIVPSR       | 0.779029 | 0.9957   | 0.722419 | 1.425651 | 0.763385 | 1.0239   | 0.7592   | 1.254774 | 0.90891  | 0.9957  | 1.311983 | 1.022216 |
| sp P69784 PTGA_ECOL6-IVGDGIAIKPTGNK   | 0.865024 | 0.5858   | 1.514919 | 0.16472  | 0.99806  | 0.6474   | 1.83106  | 0.28764  | 1.360669 | 0.75105 | 1.83106  | 0.216266 |
| sp P33599 NUOCD_ECOLI-IGGVAHDLPR      | 1.072168 | 0.453    | 1.525213 | 32.41806 | 1.091736 | 0.453    | 2.079844 | 6.099936 | 3.314253 | 0.453   | 1.990722 | 2.688881 |
| sp B7LF91 GCST_ECO55-DDLSMIAVQGPNAQAK | 1.361009 | 0.81045  | 0.777532 | 0.36535  | 0.992703 | 1.1226   | 0.675244 | 0.36535  | 2.988794 | 0.99925 | 0.787232 | 0.60753  |
| sp B7LA23 GLPK_ECO55-ATLESIAQTR       | 0.957358 | 1.273175 | 1.590727 | 1.338417 | 0.882837 | 1.71065  | 1.164893 | 1.292826 | 0.802299 | 1.3871  | 1.018548 | 1.055974 |
| sp A7ZV12 CH60_ECO24-LAGGVAVIK        | 0.260759 | 0.6154   | 1.837737 | 0.823462 | 0.38553  | 0.9401   | 2.180007 | 0.977911 | 0.44538  | 0.9401  | 1.984245 | 0.708145 |
| sp C4ZPU9 RS20_ECOBW-VYAAIEAGDK       | 2.532035 | 1.04585  | 0.089474 | 2.753238 | 7.925252 | 1.08595  | 0.308674 | 3.510075 | 1.495899 | 0.9286  | 0.692215 | 8.159788 |
| sp P0A6F2 CARA_ECO57-SALLVLEDGTQFHGR  | 3.095186 | 0.765672 | 1.293818 | 0.303875 | 2.500271 | 0.4637   | 1.01515  | 0.085958 | 1.958021 | 0.704   | 1.526912 | 0.707071 |
| sp P0AGF0 SUCD_ECOL6-SLADIGEALK       | 0.398714 | 1.3651   | 0.993867 | 0.387351 | 0.733043 | 1.4712   | 0.923265 | 0.853016 | 0.695555 | 0.99    | 0.750991 | 0.623871 |
| sp P0AG68 RS1_ECOL6-SESAIPAEQFK       | 0.352273 | 0.78255  | 0.552469 | 0.457866 | 0.557298 | 0.3748   | 0.386224 | 0.42546  | 0.818046 | 0.7658  | 0.853311 | 0.515812 |
| sp A7ZTU4 ATPB_ECO24-GVQSILQR         | 0.72547  | 0.715522 | 1.059774 | 0.778791 | 1.102692 | 0.5635   | 0.78453  | 0.904838 | 0.857306 | 0.61135 | 0.805079 | 0.668479 |
| sp P63285 CLPB_ECO57-YTIDLTER         | 1.604348 | 1.589453 | 0.622488 | 1.861279 | 2.06903  | 1.501279 | 0.395322 | 1.366434 | 1.397169 | 2.0149  | 0.485117 | 1.296341 |
| sp A1AGI5 RL17_ECOK1-HEIHK            | 0.809304 | 0.689147 | 0.857078 | 0.173649 | 0.714363 | 0.701125 | 0.521305 | 0.115484 | 0.657932 | 0.1978  | 0.78144  | 0.202971 |

|                                      |          |          |          |          |          |          |          |          |          |         |          |          |
|--------------------------------------|----------|----------|----------|----------|----------|----------|----------|----------|----------|---------|----------|----------|
| sp A1AGI6 RPOA_ECOK1-LENWPPASIADE    | 1.807059 | 1.079935 | 1.554461 | 0.704289 | 1.482773 | 0.8963   | 1.275177 | 0.704289 | 1.482773 | 1.141   | 1.275177 | 0.697914 |
| sp P0A910 OMPA_ECOLI-LGYPTDDLDIYTR   | 1.367654 | 0.9591   | 1.32605  | 0.42509  | 1.461631 | 0.8858   | 1.279411 | 0.35038  | 1.373258 | 0.96655 | 1.220806 | 0.284253 |
| sp B1LNK7 GLYA_ECOSM-VMQAQGSQTLNK    | 1.174431 | 1.68775  | 0.978303 | 0.750262 | 2.403068 | 0.67     | 0.960522 | 0.776639 | 1.531638 | 0.6453  | 0.955693 | 0.613208 |
| sp P0A6Z5 HTPG_ECO57-EGEDEFLLDDWR    | 2.712204 | 0.9814   | 1.347922 | 1.431487 | 3.487894 | 0.9814   | 0.987439 | 1.18314  | 2.953667 | 0.9814  | 0.76593  | 0.775194 |
| sp B1LNK7 GLYA_ECOSM-TLAGPR          | 1.642547 | 0.78249  | 2.547917 | 2.304881 | 1.642547 | 0.699798 | 1.963634 | 2.437406 | 7.075308 | 0.57975 | 1.248452 | 2.372985 |
| sp C4ZZ44 ILVC_ECOBW-AIPEGAVDNGQLR   | 1.01623  | 1.36759  | 0.781428 | 2.403194 | 1.170936 | 1.249248 | 0.630351 | 3.979158 | 1.11487  | 0.58    | 0.44067  | 2.886285 |
| sp P68206 YJBJ_ECOLI-LTDDDMTHIEGK    | 2.098684 | 0.2505   | 0.748778 | 1.804488 | 3.28951  | 2.68655  | 0.181345 | 1.868035 | 3.28951  | 2.101   | 0.065446 | 2.025475 |
| sp P17169 GLMS_ECOLI-GDQYPIALEGALK   | 0.896756 | 0.2157   | 0.632191 | 7.925315 | 1.555573 | 0.6036   | 0.880573 | 7.023602 | 1.544292 | 0.9036  | 1.05811  | 1.69755  |
| sp P0AGF0 SUCD_ECOL6-GGTTHLGLPVFNTVR | 1.359491 | 0.9027   | 0.823071 | 2.754726 | 1.237414 | 0.9027   | 1.015117 | 1.592426 | 1.303273 | 0.752   | 0.97965  | 1.218339 |
| sp B5YTN8 RL2_ECO5E-GKPFAPLLEK       | 1.054421 | 0.64895  | 0.853329 | 4.372004 | 1.507414 | 0.64895  | 1.087906 | 4.886574 | 3.357234 | 0.64895 | 0.38106  | 5.507083 |
| sp B7UJN9 NUSB_ECO27-DVDVLYFR        | 0.633989 | 0.71205  | 1.553638 | 3.711812 | 0.678466 | 0.759    | 0.928508 | 2.626456 | 1.466748 | 0.759   | 1.264589 | 2.626456 |
| sp P00509 AAT_ECOLI-NYLGIDGIPEFGR    | 1.215778 | 1.5289   | 0.848006 | 1.618085 | 1.040739 | 1.74035  | 0.920543 | 1.279723 | 0.974748 | 1.39055 | 0.843322 | 1.200804 |
| sp A7ZJ31 SYL_ECO24-ITVPVDATEEQVR    | 0.841565 | 1.2906   | 0.845529 | 0.689157 | 1.01093  | 0.9831   | 0.850532 | 0.587696 | 0.520209 | 1.4053  | 0.978028 | 0.645364 |
| sp B7UIL4 RS2_ECO27-SQDLASQAEESFVEAE | 1.530131 | 1.7128   | 0.798664 | 1.216079 | 1.432442 | 0.8608   | 0.971273 | 1.242848 | 1.442967 | 1.4016  | 0.841964 | 1.21529  |
| sp B1X883 RL25_ECODH-LQHIDFVR        | 0.327547 | 0.517255 | 1.269234 | 0.608079 | 0.229305 | 0.1139   | 0.960392 | 0.110329 | 0.229305 | 0.1139  | 0.861771 | 0.132014 |
| sp P63285 CLPB_ECO57-LDMLNEELSDK     | 3.472783 | 1.177    | 1.309601 | 1.379228 | 0.748317 | 1.1834   | 0.854154 | 0.641464 | 0.684839 | 1.19955 | 0.627181 | 0.532793 |
| sp P0AB78 KBL_ECO57-ALGGASGGYTAAR    | 3.956871 | 0.3329   | 0.455391 | 4.210901 | 0.942363 | 0.3329   | 0.169655 | 2.644621 | 1.57479  | 0.4837  | 0.160094 | 3.37905  |
| sp A1AID4 CAPP_ECOK1-GEAASNPEVIAR    | 17.72497 | 0.8897   | 1.111614 | 1.194958 | 14.27817 | 0.88765  | 1.323776 | 0.905633 | 13.908   | 0.88765 | 0.819105 | 0.905633 |
| sp A7ZTP0 IBPB_ECO24-GTPEQPK         | 0.745782 | 1.5147   | 3.665451 | 0.336415 | 1.345564 | 1.5147   | 11.76308 | 0.952078 | 1.36881  | 3.59365 | 16.03763 | 1.100595 |

|                                         |          |          |          |          |          |          |          |          |          |          |          |          |
|-----------------------------------------|----------|----------|----------|----------|----------|----------|----------|----------|----------|----------|----------|----------|
| sp B7MNJ0 DEOB_ECO45-ETFADIGQTLAK       | 1.375883 | 4.24815  | 0.294603 | 1.624448 | 2.386545 | 4.24815  | 0.320649 | 2.045404 | 2.401453 | 4.24815  | 0.320649 | 0.953033 |
| sp B7MIX0 RL1_ECO45-VDFDADK             | 0.566746 | 0.596194 | 0.380775 | 0.683396 | 0.619868 | 0.2721   | 0.380775 | 0.683396 | 0.394511 | 0.2721   | 0.992783 | 0.683396 |
| sp A1AGI6 RPOA_ECOK1-IHSEEDERPIGR       | 3.000651 | 0.651361 | 0.893957 | 1.204796 | 2.862288 | 0.431    | 0.597015 | 1.360189 | 2.736123 | 0.4428   | 0.608321 | 1.187318 |
| sp A8A5E7 EFG_ECOHS-DVTTGDTLCPDAPILER   | 0.663382 | 0.5991   | 0.726179 | 0.688987 | 0.663382 | 0.6627   | 0.877001 | 0.688987 | 0.644782 | 0.671115 | 0.877001 | 0.680657 |
| sp P63285 CLPB_ECO57-IPELEK             | 1.517212 | 0.5068   | 1.307223 | 18.52224 | 1.517212 | 0.5068   | 1.418437 | 22.41439 | 1.517212 | 0.5068   | 1.418437 | 4.852952 |
| sp P00579 RPOD_ECOLI-AQYVVTR            | 0.665164 | 3.6344   | 0.976356 | 0.596496 | 0.428012 | 3.6344   | 1.30253  | 0.811114 | 0.428012 | 3.6344   | 0.492956 | 0.811114 |
| sp B1LNH0 ISPG_ECOSM-INPGNIGNEER        | 2.660666 | 0.4566   | 1.177698 | 3.298256 | 3.151635 | 0.5373   | 1.739529 | 3.07563  | 2.397354 | 0.5373   | 1.739529 | 3.07563  |
| sp P77395 CNOX_ECOLI-DLTAADGQTR         | 1.34143  | 0.3577   | 0.763146 | 0.995551 | 1.34143  | 0.3577   | 0.763146 | 0.995551 | 1.461654 | 0.4953   | 3.327743 | 2.346049 |
| sp A7ZSL4 EFTU1_ECO24-TVGAGVVAK         | 0.833084 | 0.8173   | 0.578065 | 0.794597 | 0.58067  | 0.5304   | 0.924024 | 1.710164 | 0.531429 | 0.6924   | 1.07157  | 0.695368 |
| sp P0A9X5 MREB_ECOL6-GQGIVLNPSVVAIR     | 1.17873  | 0.782    | 1.694011 | 0.220752 | 1.729034 | 0.782    | 1.694011 | 0.742407 | 2.100197 | 0.782    | 1.459609 | 0.773842 |
| sp A7ZTU4 ATPB_ECO24-VGLFGGAGVGK        | 0.907751 | 0.9688   | 0.504543 | 0.348814 | 0.827873 | 0.9688   | 0.271156 | 0.772307 | 0.775915 | 0.9045   | 0.184966 | 0.417226 |
| sp P36683 ACNB_ECOLI-TDVLIDEVR          | 2.553908 | 1.083678 | 1.131198 | 1.858991 | 4.086689 | 0.726082 | 0.340116 | 2.145675 | 1.176091 | 1.1106   | 0.231512 | 2.145675 |
| sp P10384 FADL_ECOLI-GNYSSDLNR          | 1.647994 | 1.203624 | 0.465106 | 1.11088  | 2.252512 | 1.39255  | 0.804335 | 0.316449 | 1.906848 | 1.39255  | 0.773204 | 0.494551 |
| sp P36683 ACNB_ECOLI-LLDAHK             | 0.722824 | 1.334197 | 0.71545  | 1.925994 | 0.631939 | 1.268498 | 0.893913 | 0.372793 | 0.757191 | 1.46174  | 0.792566 | 0.372793 |
| sp P0AC34 FUMA_ECOL6-VWTGGGDEAALAR      | 3.579058 | 1.012982 | 3.801366 | 0.449674 | 6.084611 | 0.4021   | 3.801366 | 0.617644 | 6.084611 | 0.4021   | 1.974787 | 0.790742 |
| sp P0AFF8 NUSA_ECO57-GAQLFVTR           | 4.315846 | 0.943846 | 5.538637 | 2.152946 | 3.634214 | 0.7067   | 1.601106 | 2.855301 | 3.744901 | 0.7067   | 0.916998 | 2.652522 |
| sp A7ZP73 ARNA_ECO24-GIPVYAPDDVNHPLWVER | 0.760925 | 1.4385   | 1.363763 | 1.178938 | 0.98042  | 1.4421   | 1.363763 | 1.178938 | 1.030743 | 1.4421   | 1.363763 | 1.417731 |
| sp P0AFG5 ODO1_ECO57-IEQLYPFPHK         | 0.582357 | 2.2432   | 2.336701 | 0.341273 | 0.36904  | 0.92185  | 1.142408 | 0.38479  | 0.471441 | 1.0686   | 1.236167 | 0.357221 |
| sp P0A9M8 PTA_ECOLI-NTNITGVIVNK         | 0.271463 | 2.2815   | 0.151093 | 1.158071 | 0.297336 | 2.2815   | 0.179019 | 1.224438 | 1.271949 | 1.5433   | 0.546565 | 1.224438 |

|                                         |          |          |          |          |          |          |          |          |          |          |          |          |
|-----------------------------------------|----------|----------|----------|----------|----------|----------|----------|----------|----------|----------|----------|----------|
| sp P0ABK6 CYSK_ECO57-ALGANLVLTEGAK      | 1.40006  | 1.2931   | 1.831595 | 0.313962 | 1.959838 | 1.0087   | 1.322653 | 0.34609  | 2.164434 | 1.23565  | 2.006121 | 0.34609  |
| sp P0AC41 SDHA_ECOLI-LPGILELSR          | 0.917945 | 0.361    | 0.708484 | 1.016265 | 0.506559 | 0.7187   | 1.606684 | 0.652189 | 0.506559 | 0.53985  | 2.182316 | 1.090577 |
| sp P0ACG0 HNS_ECO57-ILNNIR              | 2.099018 | 0.7732   | 0.421078 | 0.437569 | 0.596831 | 0.7732   | 0.57845  | 0.437569 | 0.618658 | 0.7732   | 0.57845  | 0.298615 |
| sp P23869 PPIB_ECOLI-APETVK             | 0.312727 | 6.0672   | 5.688514 | 0.428268 | 0.508292 | 6.0672   | 4.819869 | 2.81441  | 0.752666 | 6.0672   | 4.750054 | 0.434838 |
| sp P0A9K5 PHOL_ECO57-EITLEPADNAR        | 1.473769 | 1.673725 | 1.136672 | 0.109286 | 1.60178  | 1.366459 | 1.376526 | 0.115287 | 1.306622 | 1.6242   | 1.213968 | 0.193173 |
| sp P0A6Z5 HTPG_ECO57-ALSNPDLYEGDGELR    | 0.783955 | 1.9811   | 0.700415 | 1.220569 | 0.783955 | 1.9811   | 0.700415 | 1.220569 | 0.576185 | 1.7219   | 0.700415 | 0.92048  |
| sp A7ZIN4 KAD_ECO24-YGIPQISTGDMLR       | 0.970163 | 0.2642   | 2.478669 | 6.040113 | 0.295245 | 0.3823   | 1.308794 | 6.382748 | 0.342502 | 0.5004   | 0.984263 | 3.519423 |
| sp P0AG68 RS1_ECOL6-HPSEIVNVGDEITVK     | 0.649405 | 0.5297   | 0.8259   | 4.104338 | 0.62951  | 1.4529   | 0.766551 | 1.380562 | 0.668662 | 1.3794   | 0.637851 | 0.735991 |
| sp P0AG68 RS1_ECOL6-ANPQQFAETHNK        | 0.750006 | 2.3182   | 0.810566 | 1.369402 | 2.75212  | 2.3182   | 0.792422 | 1.277348 | 1.596219 | 2.3182   | 0.409241 | 1.51829  |
| sp P0A6Y9 DNAK_ECOL6-NQGDHLLHSTR        | 1.312757 | 1.20785  | 1.216086 | 0.547434 | 1.71055  | 1.0041   | 1.145588 | 0.678215 | 1.71055  | 1.0041   | 1.218731 | 0.60959  |
| sp P0AEZ3 MIND_ECOLI-ASNQGEPVILDINADAGK | 0.703471 | 1.7286   | 2.001939 | 0.222559 | 1.450337 | 1.6028   | 1.653436 | 0.225314 | 1.692949 | 1.7286   | 1.176049 | 0.213431 |
| sp P0AF93 RIDA_ECOLI-TGEVPADVAAQAR      | 1.728142 | 1.318    | 0.915437 | 1.414121 | 1.277815 | 1.318    | 0.656654 | 1.329492 | 1.019824 | 1.3788   | 0.756703 | 1.168742 |
| sp P0ACD5 ISCU_ECOL6-SLDEAQAIAK         | 0.928698 | 0.85355  | 1.026015 | 0.414855 | 1.762513 | 0.85355  | 1.026015 | 0.60603  | 2.040842 | 0.64395  | 0.673492 | 0.475381 |
| sp P69832 PTKC_ECO57-FSADDIQR           | 1.076837 | 0.7843   | 0.979942 | 0.445743 | 1.213169 | 0.6841   | 0.838261 | 0.589898 | 1.190036 | 0.7843   | 0.895076 | 0.956468 |
| sp P0A6Z5 HTPG_ECO57-SSPHLELLR          | 0.460626 | 1.295691 | 1.081604 | 0.465009 | 0.59774  | 0.893833 | 2.215193 | 0.465009 | 0.609325 | 1.035871 | 1.527383 | 0.465009 |
| sp B1XB97 HSLU_ECODH-HIIGQDNAK          | 0.319921 | 6.3364   | 1.19483  | 7.466209 | 0.232067 | 3.9474   | 1.51576  | 4.003228 | 0.572423 | 0.8874   | 2.118398 | 0.523355 |
| sp P08839 PT1_ECOLI-AGETFGEEK           | 2.543821 | 1.9494   | 0.750845 | 0.998352 | 1.603276 | 1.3979   | 0.296165 | 0.602012 | 3.521133 | 1.3979   | 1.228239 | 0.568717 |
| sp B7UPE0 RL10_ECO27-AAAFEGELIPASQIDR   | 0.61165  | 2.3674   | 0.889843 | 0.154464 | 0.784301 | 2.3674   | 0.935607 | 0.782275 | 0.735352 | 1.3339   | 0.90048  | 1.576679 |
| sp B1IU2 SYA_ECOLC-IISESGTAAGVR         | 3.523728 | 0.3391   | 0.988002 | 0.393647 | 2.278369 | 0.735    | 0.988002 | 0.444292 | 2.98515  | 0.55785  | 1.70485  | 0.419146 |

|                                          |          |          |          |          |          |         |          |          |          |         |          |          |
|------------------------------------------|----------|----------|----------|----------|----------|---------|----------|----------|----------|---------|----------|----------|
| sp P63285 CLPB_ECO57-WTGIPVSR            | 1.26349  | 0.4937   | 1.709541 | 1.001819 | 1.191185 | 0.7878  | 1.013263 | 0.526355 | 1.470103 | 0.7878  | 0.674908 | 0.612682 |
| sp P0A9B3 G3P_ECOL6-AATYEQIK             | 1.133105 | 0.7477   | 1.153241 | 0.936441 | 1.133105 | 0.87835 | 1.116762 | 0.900815 | 1.024026 | 1.00875 | 1.32345  | 0.758191 |
| sp P27302 TKT1_ECOLI-QNLAQQR             | 1.801672 | 1.490225 | 0.84581  | 0.710334 | 2.307628 | 1.4943  | 1.546145 | 0.620105 | 2.307628 | 1.4943  | 1.709573 | 0.522857 |
| sp P27550 ACSA_ECOLI-NTSFAPGNVSIK        | 1.284224 | 1.5618   | 0.778127 | 6.862177 | 0.510803 | 3.08595 | 0.566628 | 0.940309 | 0.281518 | 2.4721  | 1.138884 | 0.297653 |
| sp A7ZSL0 RS10_ECO24-LIDQATAEIVETAK      | 3.143795 | 0.9685   | 0.267565 | 1.148451 | 1.977563 | 3.8006  | 0.267565 | 1.214224 | 0.848973 | 3.8006  | 0.543435 | 0.414887 |
| sp P0AE10 AHPC_ECO57-NGEFIEITEK          | 0.990958 | 1.4221   | 0.823673 | 0.307971 | 1.295842 | 1.2173  | 0.8745   | 0.36005  | 1.295276 | 1.2592  | 0.879332 | 0.338612 |
| sp P0AG32 RHO_ECO57-MNLTELK              | 2.931116 | 0.3699   | 1.994918 | 0.833471 | 3.401702 | 0.3699  | 1.773292 | 0.801256 | 1.588313 | 0.3699  | 1.773292 | 0.935305 |
| sp A7ZSD0 MDH_ECO24-SNTFVAELK            | 0.801249 | 0.59325  | 1.010106 | 0.955441 | 0.534866 | 0.6048  | 1.467482 | 1.204393 | 0.534866 | 0.76675 | 1.179232 | 0.719637 |
| sp B7UPE0 RL10_ECO27-QAIVAEVSEVAK        | 0.438978 | 0.8035   | 0.545573 | 0.276013 | 1.175586 | 0.9551  | 0.169941 | 0.228796 | 1.297315 | 0.7142  | 0.467742 | 0.233526 |
| sp A7ZJA8 SUCC_ECO24-AFAENWLK            | 0.313748 | 1.69955  | 2.179033 | 0.581835 | 0.69073  | 1.40615 | 0.864522 | 0.757859 | 0.732155 | 1.40615 | 0.205852 | 0.590661 |
| sp B7NMH9 NFUA_ECO7I-LLANQEEGTQIR        | 1.981231 | 1.318045 | 1.278432 | 0.985774 | 2.812012 | 0.9745  | 1.075435 | 1.319741 | 3.527887 | 0.9915  | 0.957694 | 0.476298 |
| sp P0AFG5 ODO1_ECO57-VYYDLLEQR           | 0.405868 | 0.9603   | 0.782843 | 0.405269 | 0.566653 | 1.66265 | 0.525491 | 1.006366 | 0.566653 | 0.9603  | 0.525491 | 0.783787 |
| sp P0A9P2 DLDH_ECO57-GISYETATFPWAASGR    | 1.215384 | 1.36425  | 0.585972 | 0.993788 | 0.993484 | 1.06025 | 0.60425  | 1.00639  | 0.974251 | 0.9164  | 0.575404 | 1.228866 |
| sp P09546 PUTA_ECOLI-GIYEGPGISIK         | 2.358587 | 1.5331   | 2.015804 | 1.5503   | 0.763179 | 1.24195 | 1.082743 | 0.884606 | 1.244752 | 1.1516  | 1.113011 | 0.926795 |
| sp P0ADB9 ECNB_ECO57-GVGEDISDGGNAISGAATK | 1.762885 | 1.336    | 1.400287 | 1.266011 | 1.116482 | 1.21755 | 1.349159 | 1.251567 | 1.159208 | 1.21755 | 1.349159 | 0.980691 |
| sp A1AIG0 RPOC_ECOK1-VADLFEAR            | 1.80523  | 0.732513 | 0.615405 | 1.064579 | 1.80523  | 0.72444 | 0.761107 | 1.171778 | 1.80523  | 0.455   | 0.500034 | 0.429709 |
| sp B7LA23 GLPK_ECO55-VHVTDYTNASR         | 0.273978 | 1.8151   | 0.894017 | 0.711136 | 0.273978 | 1.8151  | 0.736808 | 0.441178 | 0.313397 | 1.5775  | 1.43117  | 0.44089  |
| sp A8A0Q4 IHFA_ECOHS-AEMSEYLFDK          | 0.789411 | 1.2229   | 1.049114 | 0.678537 | 0.985372 | 1.3033  | 1.044908 | 0.716729 | 1.102779 | 1.2631  | 0.985947 | 0.708726 |
| sp P27298 OPDA_ECOLI-LVAVVPSPSWGR        | 1.081188 | 0.6465   | 0.634652 | 1.209914 | 1.622441 | 0.6465  | 0.49015  | 0.879125 | 1.020616 | 0.6465  | 0.49015  | 0.759872 |

|                                              |          |          |          |          |          |          |          |          |          |          |          |          |
|----------------------------------------------|----------|----------|----------|----------|----------|----------|----------|----------|----------|----------|----------|----------|
| sp B7LA23 GLPK_ECO55-MLEVLDIR                | 0.593136 | 0.7484   | 1.101772 | 0.334367 | 1.040257 | 0.9042   | 0.860813 | 0.541154 | 0.935678 | 0.949    | 0.916178 | 0.179438 |
| sp P0A9Y0 CSPA_ECOL6-GFGFITPDDGSK            | 0.939617 | 1.7947   | 0.518597 | 1.000238 | 1.103428 | 1.7947   | 0.518597 | 0.296636 | 0.775807 | 1.69835  | 2.04529  | 0.473289 |
| sp B7M1N4 RL3_ECO8A-TQDATHGNSLSHR            | 0.758587 | 1.242235 | 0.731124 | 0.327377 | 0.501084 | 1.149832 | 0.705131 | 0.4682   | 0.867204 | 0.2129   | 0.796429 | 0.563063 |
| sp P63285 CLPB_ECO57-AGLADPNRPIGSFLFLGPTGVGK | 0.270913 | 0.29075  | 4.150681 | 0.724417 | 0.712639 | 0.3867   | 3.043563 | 0.721087 | 0.780807 | 0.3867   | 1.967017 | 0.543046 |
| sp B5Z3U4 TIG_ECO5E-SQAIEGLVK                | 1.418897 | 0.6375   | 0.650478 | 0.562188 | 2.005888 | 1.05715  | 0.650478 | 0.687849 | 1.93618  | 1.05715  | 0.648891 | 0.585266 |
| sp B5Z0E9 EFTS_ECO5E-AQFEEER                 | 1.886569 | 1.3397   | 1.202278 | 2.115389 | 1.542053 | 1.02425  | 1.019949 | 1.515955 | 1.450448 | 1.1334   | 1.002431 | 1.628901 |
| sp A7ZTP0 IBPB_ECO24-QWIGFDK                 | 0.700606 | 0.94795  | 1.182598 | 0.364695 | 0.754051 | 0.8902   | 0.572372 | 0.534232 | 0.82008  | 0.77735  | 0.511553 | 0.475017 |
| sp P0A9B3 G3P_ECOL6-GASQNIIPSSTGAAK          | 1.190623 | 0.6248   | 0.965868 | 1.160493 | 1.329128 | 0.6406   | 0.862245 | 1.269991 | 1.392262 | 0.7854   | 0.960021 | 0.907958 |
| sp B7NH52 DEOD_ECOLU-IALESVLLGDKE            | 1.055693 | 1.7776   | 0.921639 | 0.266386 | 0.571664 | 1.7776   | 0.883984 | 1.4267   | 0.547717 | 1.1639   | 1.314486 | 0.782854 |
| sp A8A466 PGK_ECOHS-SLYEADLVDEAK             | 1.945324 | 1.0411   | 0.962563 | 1.519075 | 1.808782 | 0.9652   | 1.003625 | 1.223032 | 1.725984 | 0.9652   | 0.931422 | 1.467499 |
| sp P0A9B3 G3P_ECOL6-VLPELNGK                 | 1.771509 | 1.2128   | 0.081404 | 2.066852 | 1.494233 | 1.0546   | 0.13182  | 0.894197 | 2.292428 | 0.67525  | 0.500744 | 1.205937 |
| sp P0AB72 ALF_ECO57-DSVSYGVVK                | 0.854186 | 1.0294   | 3.314185 | 0.555159 | 1.733881 | 1.0294   | 0.693898 | 0.569336 | 0.564575 | 0.8513   | 1.249017 | 0.393204 |
| sp A8A2B9 AIS_ECOHS-VYLDGEFVNH               | 0.405226 | 3.786471 | 1.066201 | 0.750563 | 0.513752 | 3.891916 | 1.066201 | 1.088832 | 0.462671 | 5.0535   | 1.066201 | 1.125447 |
| sp A7ZJA8 SUCC_ECO24-IGAGPWVVK               | 0.315703 | 5.07295  | 1.110175 | 0.210028 | 1.727064 | 0.5428   | 1.131545 | 0.475427 | 1.727064 | 0.967    | 1.00078  | 0.365686 |
| sp P0AAI6 FABF_ECOL6-TIFGEAASR               | 0.54911  | 1.337266 | 1.155476 | 2.425673 | 0.701978 | 1.343819 | 1.143977 | 1.380868 | 0.544146 | 1.301518 | 1.413465 | 1.363058 |
| sp P0AEK2 FABG_ECOLI-AGILAQVPAGR             | 0.942077 | 1.3642   | 1.200498 | 0.86838  | 1.701554 | 0.93665  | 1.152716 | 0.881653 | 1.50899  | 0.8346   | 2.002115 | 1.051109 |
| sp P0A8N4 SYK1_ECOL6-VFEINR                  | 1.124711 | 1.068613 | 1.083106 | 0.056681 | 2.255014 | 0.5551   | 0.755737 | 0.795929 | 1.817165 | 0.5569   | 0.98864  | 0.59488  |
| sp P0A6Y9 DNAK_ECOL6-IINEPTAAALAYGLDK        | 0.995647 | 1.7557   | 1.055666 | 0.35442  | 0.881187 | 1.7491   | 0.96091  | 0.229881 | 0.773694 | 1.5041   | 1.344422 | 0.33872  |
| sp P0AES6 GYRB_ECOLI-GLLEEDAFIER             | 0.993986 | 2.9762   | 1.269025 | 2.13592  | 1.088975 | 1.7058   | 0.476627 | 1.478364 | 1.349803 | 0.7546   | 0.565002 | 1.760093 |



|                                         |          |          |          |          |          |         |          |          |          |         |          |          |
|-----------------------------------------|----------|----------|----------|----------|----------|---------|----------|----------|----------|---------|----------|----------|
| sp B7MZ75 ENO_ECO81-IQLVGDDLFVTNTK      | 0.746768 | 0.46795  | 0.55375  | 1.67975  | 0.765265 | 0.4943  | 0.531966 | 0.620973 | 0.828171 | 0.51265 | 0.7034   | 0.637914 |
| sp A7ZNR4 GATZ_ECO24-TGFNDSLDIR         | 1.039336 | 1.034113 | 0.837033 | 1.289137 | 0.875556 | 0.89225 | 1.303937 | 1.109884 | 0.525179 | 1.26915 | 0.872154 | 0.965876 |
| sp B7M1N4 RL3_ECO8A-AIQVTTGAK           | 0.562748 | 6.9224   | 0.503797 | 0.368315 | 0.562748 | 0.45885 | 0.87924  | 0.453383 | 0.66681  | 0.6423  | 0.653871 | 0.453383 |
| sp P25553 ALDA_ECOLI-LGEAMQAVQFGNPAER   | 0.475384 | 1.3366   | 0.823671 | 2.854763 | 0.26551  | 0.9758  | 1.242979 | 3.545912 | 0.366729 | 0.8886  | 1.242979 | 1.930873 |
| sp A8A2C2 ARNA_ECOHS-GIPVYAPDNVNHPLWVER | 0.760925 | 1.4385   | 1.363763 | 1.178938 | 0.98042  | 1.1731  | 1.293572 | 1.178938 | 1.471433 | 1.1731  | 1.293572 | 1.106398 |
| sp A7ZV12 CH60_ECO24-GQNEQNVGDK         | 1.951026 | 0.68055  | 0.933944 | 1.329809 | 1.953556 | 0.9326  | 0.790324 | 1.313032 | 1.529761 | 0.78425 | 0.864426 | 1.323201 |
| sp A7ZNR4 GATZ_ECO24-IQSGELSAIPHQLIMDK  | 0.438847 | 2.4838   | 0.206176 | 0.6298   | 0.482202 | 1.29995 | 0.623839 | 0.232406 | 0.482202 | 1.4184  | 0.693305 | 0.210555 |
| sp A7ZSL4 EFTU1_ECO24-REEIER            | 2.312817 | 0.3539   | 0.688125 | 3.561489 | 4.368525 | 0.4707  | 0.566416 | 2.766305 | 2.812397 | 0.57015 | 0.566416 | 2.541738 |
| sp A7ZQP6 FUCI_ECO24-YGEDENNK           | 1.462191 | 1.22965  | 1.532865 | 0.469894 | 1.828225 | 1.6192  | 1.396912 | 0.376819 | 1.922444 | 1.6192  | 1.404983 | 0.423252 |
| sp P00968 CARB_ECOLI-ALLSVR             | 3.494817 | 3.909782 | 0.209802 | 1.210756 | 8.920768 | 5.4301  | 0.270503 | 1.019102 | 4.679664 | 5.4301  | 0.270503 | 1.019102 |
| sp Q19NJ4 CH602_ECOK1-SFGAPTITK         | 0.983588 | 0.94875  | 0.667319 | 0.724552 | 0.942353 | 0.9286  | 1.182062 | 0.647997 | 0.908812 | 1.1508  | 0.843467 | 0.635471 |
| sp P0ACG0 HNS_ECO57-LEVVVNER            | 0.702561 | 0.922    | 0.392652 | 0.446521 | 0.668538 | 1.3869  | 0.646036 | 0.735241 | 0.747338 | 1.41295 | 0.540437 | 0.956721 |
| sp P69784 PTGA_ECOL6-MVAPVDGTIGK        | 0.662526 | 0.85225  | 3.285203 | 1.950522 | 0.849285 | 0.9183  | 1.305741 | 1.110678 | 0.809224 | 0.9183  | 2.137726 | 1.485481 |
| sp P45523 FKBA_ECOLI-LDGVIPGWTEGLK      | 0.123898 | 1.0435   | 0.289137 | 0.386342 | 0.645905 | 0.5375  | 0.550598 | 0.338915 | 0.465538 | 0.7237  | 0.355458 | 0.264389 |
| sp P0AG68 RS1_ECOL6-GAIVTGK             | 8.554373 | 2.2455   | 1.092622 | 1.38283  | 2.958399 | 1.4162  | 0.958315 | 1.661144 | 1.444797 | 1.5871  | 0.816844 | 1.603235 |
| sp P0A6Y9 DNAK_ECOL6-NTTIPTK            | 0.912089 | 0.5163   | 1.844725 | 1.787472 | 0.236142 | 0.8488  | 1.12183  | 1.157664 | 0.409997 | 0.7538  | 1.145858 | 0.721696 |
| sp A7ZSK4 RL22_ECO24-VSQUALDILTYTNK     | 0.574484 | 0.474037 | 0.685669 | 2.772589 | 3.829663 | 0.1749  | 0.592786 | 1.873454 | 4.176813 | 0.25315 | 0.378983 | 1.873454 |
| sp A7ZTU4 ATPB_ECO24-GEIGEEER           | 7.04003  | 1.7545   | 0.804949 | 2.071044 | 3.48154  | 1.5089  | 1.113916 | 1.865039 | 3.075558 | 1.6796  | 0.619727 | 2.360925 |
| sp A1AGK1 RL16_ECOK1-GLAQGTDVSGSFGLK    | 0.450643 | 1.3822   | 0.479205 | 2.223073 | 0.789509 | 1.3822  | 1.66494  | 2.790583 | 0.842936 | 1.3822  | 1.66494  | 2.790583 |

|                                      |          |          |          |          |          |         |          |          |          |         |          |          |
|--------------------------------------|----------|----------|----------|----------|----------|---------|----------|----------|----------|---------|----------|----------|
| sp P0AFG9 ODP1_ECO57-GAITIATR        | 0.939367 | 1.3795   | 2.375724 | 0.159345 | 0.895733 | 1.3795  | 1.923113 | 0.159345 | 0.685287 | 0.97565 | 4.011684 | 0.56441  |
| sp P31554 LPTD_ECOLI-EAPGQPEPVR      | 1.128683 | 0.9716   | 0.378378 | 1.545302 | 1.190055 | 0.96825 | 0.071175 | 1.562459 | 0.637045 | 0.9649  | 0.130436 | 1.562459 |
| sp A7ZHT6 SYP_ECO24-AQGIEVLLDDR      | 0.433879 | 1.996784 | 1.887362 | 0.920371 | 0.19193  | 1.9416  | 2.666765 | 2.143655 | 0.40056  | 1.0731  | 2.820698 | 0.898656 |
| sp B7UHB4 CSRA_ECO27-EVSVHR          | 0.317644 | 2.502742 | 0.966543 | 0.14749  | 0.245327 | 3.8696  | 0.29602  | 0.133751 | 1.04343  | 3.8696  | 0.310569 | 0.133751 |
| sp B7LA26 RRAA_ECO55-ALVDAELAR       | 0.66073  | 1.3945   | 1.449249 | 1.093687 | 0.75097  | 1.4423  | 2.122946 | 1.156665 | 0.801533 | 1.8296  | 2.153013 | 0.604667 |
| sp A7ZTP0 IBPB_ECO24-SDDNHYR         | 0.707358 | 2.7428   | 0.957887 | 0.454042 | 1.391378 | 3.39705 | 0.96471  | 0.700562 | 1.681434 | 3.39705 | 1.087399 | 0.645074 |
| sp A7ZSJ0 RL15_ECO24-AAIEAAGGK       | 1.193425 | 3.2195   | 14.9409  | 0.14708  | 1.973263 | 1.2414  | 5.440233 | 1.137305 | 1.853166 | 0.91435 | 2.49424  | 0.914351 |
| sp P09394 GLPQ_ECOLI-AGVNGLFTDFPK    | 1.13456  | 1.0274   | 0.781469 | 0.365054 | 0.799345 | 0.8918  | 0.929228 | 0.633559 | 0.733489 | 1.0131  | 0.615275 | 0.474037 |
| sp P37330 MASZ_ECOLI-ELGYLVPQPER     | 0.385079 | 3.328328 | 0.465481 | 0.84062  | 0.44814  | 5.1311  | 0.638094 | 1.033966 | 0.405301 | 5.1311  | 0.644748 | 0.692043 |
| sp P0A9Y7 CSPC_ECOL6-GPAAVNVTAI      | 1.645868 | 0.9067   | 1.304767 | 0.812292 | 1.651571 | 0.7715  | 1.264018 | 0.909963 | 1.660695 | 1.07325 | 1.161689 | 0.637701 |
| sp P0AG68 RS1_ECOL6-ISLGVK           | 0.949583 | 0.2576   | 1.29471  | 0.28969  | 0.828426 | 0.6881  | 1.108849 | 0.457238 | 0.467526 | 1.21285 | 1.360539 | 0.457238 |
| sp B1IT06 RS6_ECOLC-HAVTEASPMVK      | 0.296359 | 0.3426   | 0.8476   | 2.038818 | 0.307993 | 0.60535 | 0.493092 | 0.962001 | 0.350668 | 0.43125 | 0.823815 | 1.067556 |
| sp B5Z3U4 TIG_ECO5E-NVALEEQA VEAVLAK | 0.970547 | 0.51445  | 1.513903 | 0.127384 | 0.93591  | 0.5906  | 1.070113 | 0.172515 | 0.928959 | 0.5906  | 1.076644 | 0.184968 |
| sp P0A7W3 RS5_ECO57-SVEEILGK         | 0.402663 | 0.6607   | 4.802365 | 2.039739 | 0.564286 | 0.4205  | 1.189589 | 0.340247 | 0.488424 | 0.6607  | 0.866543 | 0.612147 |
| sp A1AIG0 RPOC_ECOK1-FTDMIDGQTITR    | 0.888555 | 2.4472   | 0.958241 | 1.532324 | 0.367768 | 3.61305 | 2.229249 | 1.898107 | 0.370659 | 3.61305 | 2.479573 | 3.28171  |
| sp P0A9B0 FUR_ECOL6-VIEFSDDSIEAR     | 1.537675 | 0.582702 | 1.893834 | 1.237872 | 2.109648 | 0.6222  | 1.148831 | 0.929319 | 1.433481 | 0.6222  | 1.239146 | 1.763994 |
| sp A7ZUM3 PUR9_ECO24-VPGLDFK         | 1.922831 | 0.60735  | 3.518519 | 1.869504 | 0.370455 | 0.5702  | 2.182328 | 1.681069 | 0.840709 | 0.5702  | 1.677241 | 2.158259 |
| sp B5Z3U4 TIG_ECO5E-INPAGAPTYVPGEYK  | 1.415752 | 0.7654   | 0.64824  | 0.49747  | 1.332544 | 0.8642  | 0.589425 | 0.476511 | 1.536455 | 0.8642  | 0.830086 | 0.40365  |
| sp B7M1N3 RL4_ECO8A-AEVTGSGK         | 1.196726 | 1.058    | 0.908525 | 0.537447 | 1.350308 | 1.77165 | 0.904381 | 0.514    | 1.977843 | 1.3859  | 0.888985 | 0.492757 |

|                                          |          |          |          |          |          |         |          |          |          |         |          |          |
|------------------------------------------|----------|----------|----------|----------|----------|---------|----------|----------|----------|---------|----------|----------|
| sp P63285 CLPB_ECO57-GYEIHISDEALK        | 1.620989 | 1.6043   | 1.016665 | 2.882105 | 1.391928 | 1.6043  | 1.2176   | 1.357626 | 1.592111 | 1.6043  | 0.988303 | 2.401463 |
| sp A7ZUJ6 RL11_ECO24-TPPAVLLK            | 1.388149 | 0.93693  | 3.985657 | 1.284809 | 0.466593 | 1.6631  | 3.664235 | 1.617133 | 0.466593 | 0.4237  | 1.237678 | 1.549571 |
| sp B5YTN8 RL2_ECO5E-DGAYVTLR             | 1.212529 | 2.4972   | 1.352056 | 0.255794 | 1.649984 | 2.4972  | 1.674417 | 0.344159 | 2.479933 | 2.4972  | 1.674417 | 0.255794 |
| sp P45523 FKBA_ECOLI-DAADNEAK            | 3.502037 | 0.8856   | 0.8576   | 6.162159 | 2.05472  | 1.0078  | 2.466085 | 6.162159 | 1.36064  | 1.16175 | 1.888862 | 1.309115 |
| sp P36683 ACNB_ECOLI-ILEIEGLPDLK         | 0.886128 | 1.616088 | 1.911018 | 0.304172 | 1.10112  | 1.3502  | 0.979154 | 0.237022 | 1.19509  | 1.3502  | 1.280371 | 0.31333  |
| sp K0BE10 TAL_ECO1E-AAEQLEK              | 0.461656 | 0.732    | 0.607573 | 0.771121 | 3.523888 | 0.68645 | 1.357933 | 0.708149 | 3.164423 | 0.6148  | 1.67884  | 2.396503 |
| sp B5Z3U4 TIG_ECO5E-ASDFVLAMGQGR         | 0.764005 | 2.7542   | 0.668913 | 5.422595 | 0.791667 | 2.5274  | 0.720914 | 3.484579 | 0.791667 | 2.0113  | 0.694913 | 1.031414 |
| sp K0BE10 TAL_ECO1E-ITESEFLWQHNQDPMVAVDK | 1.334012 | 1.1288   | 2.533357 | 1.049871 | 1.430024 | 1.1288  | 2.367559 | 1.069133 | 1.615665 | 1.25475 | 1.783555 | 1.069133 |
| sp B7MZ75 ENO_ECO81-EIIDS                | 8.228667 | 0.7306   | 0.271705 | 3.197173 | 5.081    | 0.7306  | 0.258572 | 7.511406 | 5.081    | 0.7306  | 0.258572 | 7.511406 |
| sp P0ACG2 STPA_ECO57-TWTGQGR             | 2.057499 | 3.6371   | 0.133156 | 1.173792 | 2.755826 | 3.6371  | 0.188472 | 1.473467 | 3.111626 | 3.6371  | 0.192032 | 1.179102 |
| sp P0AG19 PURE_ECO57-AQTDEVLENPDPR       | 1.199032 | 1.0292   | 0.892233 | 1.410195 | 0.482628 | 1.5729  | 0.930424 | 1.547806 | 0.592607 | 1.09375 | 1.0825   | 2.439294 |
| sp A8A750 KATG_ECOHS-AVAEVYASSDAHEK      | 1.784436 | 3.6286   | 1.594696 | 0.750957 | 2.123302 | 2.3178  | 1.044023 | 0.509547 | 0.605117 | 1.007   | 1.328631 | 0.500721 |
| sp P08839 PT1_ECOLI-TEFLFMDR             | 0.473407 | 2.501942 | 0.385805 | 4.542495 | 0.304914 | 3.9593  | 0.598244 | 2.527696 | 0.354058 | 2.1627  | 0.663414 | 0.486181 |
| sp A7ZST1 PCKA_ECO24-NTYASPEQWQEK        | 1.323143 | 1.5451   | 0.135851 | 0.779378 | 1.014958 | 1.5451  | 0.27083  | 0.587438 | 1.887856 | 1.1467  | 0.326944 | 1.072084 |
| sp A8A6H0 TNAE_ECOHS-YDIPVVMDSAR         | 1.669905 | 1.457028 | 0.87414  | 0.749551 | 0.735286 | 1.5486  | 1.184885 | 1.091249 | 1.415017 | 1.5486  | 0.994877 | 0.753777 |
| sp A7ZJA8 SUCC_ECO24-GLTDAAQQVVAAVEGK    | 0.695404 | 1.5299   | 5.709046 | 0.542806 | 0.569508 | 1.7872  | 5.709046 | 0.432734 | 0.849729 | 1.5299  | 5.62199  | 0.150201 |
| sp P62593 BLAT_ECOLX-VGYIELDLNSGK        | 14.59337 | 0.42215  | 0.753966 | 2.515286 | 11.93641 | 0.4462  | 0.850631 | 2.220888 | 9.40328  | 0.58365 | 0.500176 | 1.513989 |
| sp P0ABH7 CISY_ECOLI-ITFIDGDEGILLHR      | 1.544744 | 0.598197 | 0.480588 | 1.344123 | 0.836222 | 0.39465 | 0.635337 | 1.237861 | 0.80831  | 0.5146  | 0.63073  | 1.367855 |
| sp P0A9S3 GATD_ECOLI-IASSGLCGSDLPR       | 2.184951 | 2.2261   | 1.715397 | 1.20732  | 1.599386 | 2.2972  | 2.422895 | 0.808007 | 1.383652 | 2.2972  | 1.475619 | 0.480351 |

|                                        |          |          |          |          |          |          |          |          |          |          |          |          |
|----------------------------------------|----------|----------|----------|----------|----------|----------|----------|----------|----------|----------|----------|----------|
| sp P0AFG9 ODP1_ECO57-VQLLGSGSILR       | 1.372257 | 1.032989 | 1.017487 | 0.185754 | 1.309563 | 0.7835   | 0.75921  | 0.487738 | 1.309563 | 0.7835   | 0.75921  | 0.487738 |
| sp P0A6Z5 HTPG_ECO57-LADEVDESAK        | 0.459271 | 2.10965  | 1.358179 | 0.993619 | 0.454255 | 2.3908   | 0.681346 | 1.623655 | 0.567618 | 1.1148   | 0.688471 | 0.917338 |
| sp P0AEZ3 MIND_ECOLI-LVGVIPEDQSVLR     | 0.94754  | 0.60785  | 0.627685 | 7.065427 | 0.94754  | 0.60785  | 0.666694 | 7.065427 | 1.288802 | 0.60785  | 0.577394 | 7.065427 |
| sp B5YTN8 RL2_ECO5E-DGIPAVVER          | 0.935981 | 1.251    | 0.69427  | 1.114747 | 3.05709  | 1.251    | 0.190119 | 1.114747 | 3.273038 | 1.0303   | 0.190119 | 1.114747 |
| sp P0ABH7 CISY_ECOLI-YSIGQPFVYPR       | 0.581666 | 0.7734   | 0.833904 | 3.115494 | 1.091164 | 0.65645  | 0.830457 | 2.334641 | 0.871014 | 0.8776   | 0.804277 | 1.243014 |
| sp A7ZTP0 IBPB_ECO24-QEDLEIQLEGTR      | 1.186993 | 0.57585  | 1.216547 | 1.792149 | 1.400854 | 0.7657   | 1.016787 | 2.173492 | 1.369716 | 0.57585  | 0.741663 | 2.173492 |
| sp P0AG32 RHO_ECO57-TNDDFFEMMK         | 0.703314 | 2.0999   | 0.9303   | 1.017284 | 0.997507 | 1.56305  | 0.945767 | 1.319155 | 0.680223 | 2.0999   | 1.235503 | 1.447045 |
| sp A1AIG0 RPOC_ECOK1-LGIQAFEPVLIIEGK   | 0.766023 | 1.7786   | 0.372662 | 0.579342 | 1.051546 | 1.7786   | 1.263666 | 0.309454 | 1.155609 | 1.79225  | 1.263666 | 0.210286 |
| sp P00350 6PGD_ECOLI-EFVESLETPR        | 3.583513 | 2.474764 | 1.031173 | 0.951916 | 19.58235 | 2.38015  | 2.69601  | 0.723687 | 5.152296 | 3.71835  | 1.457689 | 0.83067  |
| sp B5Z0E9 EFTS_ECO5E-EHNAEVTGFIR       | 2.00435  | 2.2621   | 0.394912 | 2.133183 | 6.100193 | 2.2621   | 0.771257 | 1.478464 | 5.896964 | 1.5317   | 0.444558 | 1.478464 |
| sp P00509 AAT_ECOLI-TPVLTSVK           | 1.279138 | 1.5144   | 2.713697 | 1.284164 | 1.666299 | 0.9078   | 2.260403 | 0.376063 | 1.424195 | 2.31745  | 2.260403 | 1.024087 |
| sp Q00037 TNPA_ECOLI-LISEIR            | 1.172824 | 0.639847 | 0.578119 | 1.469111 | 0.127257 | 0.6666   | 0.617722 | 1.071289 | 0.127257 | 0.6666   | 0.272968 | 1.09123  |
| sp B7LF91 GCST_ECO55-EALEVQR           | 0.280641 | 0.822152 | 1.717141 | 2.079999 | 0.423196 | 0.6853   | 1.717141 | 0.963502 | 0.625849 | 1.6219   | 2.041229 | 0.259697 |
| sp P36683 ACNB_ECOLI-GFPLAYVGDVVGTGSSR | 0.995122 | 1.9482   | 1.023468 | 1.082554 | 5.729186 | 2.68635  | 0.580947 | 1.170764 | 5.178204 | 1.7327   | 0.585067 | 1.155619 |
| sp P23869 PIIB_ECOLI-EGFYNTIFHR        | 3.757964 | 1.963355 | 0.872989 | 3.568323 | 0.759728 | 1.289614 | 0.831367 | 3.524026 | 0.633871 | 1.090649 | 0.822817 | 1.039848 |
| sp P0AD50 YFIA_ECOL6-DANFVEEVEEE       | 0.340071 | 0.6396   | 1.00674  | 0.537583 | 0.340071 | 0.2975   | 1.462622 | 0.537583 | 0.542853 | 0.4116   | 1.013454 | 0.528377 |
| sp B7M107 RL30_ECO8A-ATLLGLGLR         | 0.779897 | 1.37     | 1.077366 | 0.443033 | 1.194519 | 1.66975  | 1.191056 | 0.827861 | 0.97172  | 1.9892   | 1.086248 | 0.538557 |
| sp A7ZP72 ARNC_ECO24-ADEGYDVGTVR       | 0.749379 | 0.6643   | 2.914146 | 0.535833 | 1.136078 | 0.6643   | 3.985974 | 0.534671 | 1.078564 | 0.6643   | 2.779467 | 0.572438 |
| sp B7MRB2 RL7_ECO81-ALEEAGAEVEVK       | 1.451199 | 0.4523   | 1.884845 | 0.413742 | 1.986659 | 0.4849   | 1.380932 | 1.109914 | 1.368879 | 0.7424   | 1.795779 | 0.423664 |

|                                         |          |          |          |          |          |          |          |          |          |         |          |          |
|-----------------------------------------|----------|----------|----------|----------|----------|----------|----------|----------|----------|---------|----------|----------|
| sp A7ZV12 CH60_ECO24-DTTTIDGVGEEAAIQGR  | 1.022251 | 0.34665  | 0.854911 | 2.744798 | 0.847669 | 0.7488   | 1.009095 | 2.000814 | 0.988564 | 0.8001  | 0.86694  | 2.045681 |
| sp P63285 CLPB_ECO57-VLALDMGALVAGAK     | 0.496305 | 2.52925  | 0.863544 | 0.630845 | 0.364601 | 2.56725  | 1.525128 | 2.873281 | 0.318296 | 2.25145 | 2.118774 | 1.025122 |
| sp P0AFG7 ODO2_ECO57-QQASLEEQNNDALSPAIR | 1.045592 | 1.5965   | 1.19316  | 3.629281 | 0.960713 | 1.39995  | 1.314778 | 2.316184 | 1.078258 | 1.39995 | 1.175634 | 2.130535 |
| sp P0A6G1 CH10_ECO57-SAGGIVLTGSAAAK     | 1.170251 | 0.6533   | 1.34588  | 0.951559 | 1.132444 | 0.81945  | 0.792206 | 0.7362   | 1.092556 | 0.7761  | 0.743156 | 0.775675 |
| sp P0A9B3 G3P_ECOL6-HITAGAK             | 0.53725  | 0.5627   | 2.651329 | 1.360641 | 0.463833 | 0.3993   | 1.254374 | 1.360641 | 0.294089 | 0.481   | 1.939432 | 1.354164 |
| sp A7ZTH0 TDH_ECO24-FSIDDFQK            | 0.667932 | 1.11075  | 1.929788 | 0.40233  | 0.719864 | 1.4112   | 1.022881 | 0.47705  | 0.361133 | 1.4146  | 1.128325 | 0.48161  |
| sp B1LNK7 GLYA_ECOSM-VGTPAIR            | 2.873279 | 1.2429   | 1.02776  | 3.074921 | 2.873279 | 1.2429   | 0.452368 | 2.707228 | 1.906669 | 1.027   | 0.473185 | 2.549717 |
| sp P39831 YDFG_ECOLI-AVLPGMVER          | 0.548112 | 1.018402 | 0.774473 | 1.873805 | 1.504309 | 0.810798 | 0.875801 | 1.691183 | 1.216332 | 0.42    | 0.781142 | 2.20593  |
| sp B7MGS0 DPS_ECO45-AVQLGGVALGTTQVINSK  | 0.873937 | 0.45765  | 1.656332 | 0.502037 | 0.139761 | 0.6574   | 1.687336 | 0.447877 | 0.129023 | 0.49985 | 4.44531  | 0.502037 |
| sp P0AC39 ASPA_ECOL6-AVEFQDILK          | 0.418832 | 2.5799   | 0.890772 | 0.584309 | 0.974208 | 1.4053   | 1.125164 | 1.211029 | 0.550849 | 0.6644  | 1.125164 | 1.014048 |
| sp A8A6H0 TNAE_ECOHS-GLTFTYEPK          | 1.671403 | 0.9674   | 0.847058 | 2.03485  | 1.770017 | 0.9674   | 1.160149 | 1.391317 | 1.455247 | 1.0955  | 1.046555 | 1.293551 |
| sp P0ACG0 HNS_ECO57-TPAVIK              | 2.82765  | 1.292696 | 6.84868  | 1.718653 | 3.124693 | 0.3977   | 4.295295 | 5.5397   | 2.691351 | 0.3977  | 3.629923 | 6.808072 |
| sp P0AC41 SDHA_ECOLI-GEGGYLLNK          | 0.374118 | 1.3059   | 3.50038  | 0.539654 | 1.332298 | 1.52195  | 15.85835 | 0.189923 | 1.629588 | 1.738   | 0.487681 | 0.189923 |
| sp P0AC41 SDHA_ECOLI-GLEQLK             | 1.09816  | 4.2121   | 1.617095 | 0.954415 | 0.383914 | 3.08255  | 1.388717 | 0.503951 | 0.267247 | 3.08255 | 1.637446 | 0.541597 |
| sp P09546 PUTA_ECOLI-LAQQEQGTGLPHPK     | 1.214786 | 1.629672 | 0.909356 | 0.7721   | 1.405163 | 1.2981   | 0.580687 | 1.266144 | 1.86507  | 1.11295 | 1.055506 | 0.733929 |
| sp P0A819 METK_ECO57-QSPDINQGVDR        | 0.929373 | 0.929635 | 0.186813 | 1.017278 | 0.644105 | 0.5954   | 0.080353 | 0.959887 | 1.908788 | 0.9549  | 0.445825 | 1.070761 |
| sp P0AFG9 ODP1_ECO57-GYGMGDAAEGK        | 0.644866 | 0.38595  | 0.563294 | 4.894535 | 0.938091 | 0.9938   | 0.691958 | 1.323951 | 0.88127  | 0.9938  | 0.728469 | 1.110152 |
| sp A7ZSL4 EFTU1_ECO24-STCTGVEMFR        | 1.704961 | 0.8865   | 1.313184 | 1.569661 | 0.949736 | 0.6483   | 1.313184 | 1.128075 | 0.915146 | 0.6543  | 1.206357 | 1.122301 |
| sp A7ZS83 RL21_ECO24-VSEGTQTVR          | 4.997586 | 1.0168   | 0.475182 | 1.406264 | 3.036416 | 1.0168   | 0.435783 | 1.075585 | 2.89908  | 1.0168  | 0.720261 | 1.012596 |

|                                        |          |          |          |          |          |          |          |          |          |          |          |          |
|----------------------------------------|----------|----------|----------|----------|----------|----------|----------|----------|----------|----------|----------|----------|
| sp P62593 BLAT_ECOLX-IHYSQNDLVEYSPVTEK | 0.50513  | 0.2628   | 0.627318 | 0.781067 | 0.643119 | 0.9494   | 1.060174 | 1.258731 | 0.657483 | 0.7059   | 0.853015 | 0.897722 |
| sp P0ACG0 HNS_ECO57-TWTGQGR            | 2.057499 | 3.6371   | 0.133156 | 1.173792 | 2.755826 | 3.6371   | 0.188472 | 1.473467 | 3.111626 | 3.6371   | 0.192032 | 1.179102 |
| sp P0AFG5 ODO1_ECO57-GYEVGGTVR         | 1.541074 | 1.128964 | 0.438976 | 1.767285 | 11.09834 | 1.256653 | 0.454481 | 3.011365 | 1.425176 | 1.126829 | 0.23016  | 2.304455 |
| sp A7ZV12 CH60_ECO24-LIAEAMDK          | 1.009195 | 0.75565  | 0.254413 | 1.1439   | 0.749193 | 0.9661   | 1.032688 | 0.704293 | 0.829117 | 0.92425  | 1.742115 | 0.749848 |
| sp P0A7W9 RS8_ECO57-AAVTMPSSK          | 0.986377 | 0.9262   | 0.621631 | 1.295689 | 0.889791 | 0.8526   | 0.942836 | 0.969604 | 0.588977 | 0.82875  | 0.927195 | 0.808427 |
| sp C4ZRQ8 DAPD_ECOBW-AEITPANADTVTR     | 1.041592 | 1.2347   | 1.139627 | 0.362849 | 0.967999 | 1.05375  | 1.211187 | 0.367117 | 1.178203 | 1.065    | 1.221987 | 0.551478 |
| sp B7NF50 ATPA_ECOLU-VVNTLGAPIDGK      | 0.867606 | 1.10915  | 1.06969  | 0.519162 | 0.867606 | 1.1207   | 1.06969  | 0.411923 | 1.055086 | 1.1066   | 0.696203 | 0.410489 |
| sp P0A6Z5 HTPG_ECO57-YSDHIALPVEIEK     | 0.777397 | 0.9291   | 1.291521 | 0.857026 | 0.822795 | 1.0253   | 1.106071 | 0.72163  | 0.868498 | 0.9023   | 0.92583  | 0.650349 |
| sp P0A6Y9 DNAK_ECOL6-NDPLAMQR          | 0.803821 | 1.018506 | 4.242221 | 0.336314 | 1.60175  | 0.9946   | 2.680972 | 0.336314 | 2.300479 | 1.1196   | 4.534304 | 0.247553 |
| sp B7MZ75 ENO_ECO81-IEEALGEK           | 1.94871  | 0.90005  | 1.471364 | 0.230399 | 1.32404  | 1.0472   | 1.758192 | 0.350094 | 0.755185 | 1.05     | 1.28999  | 0.62074  |
| sp P39325 YTFQ_ECOLI-AAETNVAK          | 0.30998  | 1.511633 | 1.420341 | 0.695127 | 0.456487 | 1.0212   | 1.210591 | 0.651382 | 0.524245 | 1.032    | 1.210591 | 0.703634 |
| sp P00582 DPO1_ECOLI-EQGYVETLDGR       | 0.884391 | 1.243673 | 1.275298 | 1.702845 | 1.098232 | 1.576008 | 0.67931  | 1.560849 | 1.098232 | 1.467316 | 0.67931  | 1.560849 |
| sp A7ZJ31 SYL_ECO24-VTDDIGR            | 1.440338 | 0.669131 | 1.635982 | 1.649318 | 0.823753 | 0.4501   | 3.051003 | 1.649318 | 0.960111 | 0.4895   | 3.077745 | 1.649318 |
| sp P0AE10 AHPC_ECO57-YAMIGDPTGALTR     | 1.359815 | 1.2612   | 0.460122 | 0.31851  | 0.759656 | 1.12655  | 0.640099 | 0.553157 | 0.896095 | 0.9919   | 0.721872 | 0.622529 |
| sp P0A9B3 G3P_ECOL6-VVMTGPSK           | 8.619207 | 0.6717   | 3.537493 | 0.780405 | 0.549911 | 0.6717   | 2.468209 | 0.777755 | 0.69986  | 0.58585  | 1.467958 | 0.515016 |
| sp P00968 CARB_ECOLI-STGEVMGVGR        | 2.683973 | 1.2008   | 0.774448 | 1.172573 | 6.097931 | 1.3751   | 0.10546  | 1.430676 | 5.620608 | 1.3751   | 0.097193 | 1.855403 |
| sp A7ZJA8 SUCC_ECO24-MNLHEYQAK         | 4.145852 | 0.639173 | 0.656317 | 2.653708 | 1.066832 | 0.9499   | 1.016734 | 1.228152 | 0.767613 | 0.9499   | 1.344064 | 1.318653 |
| sp A1A9Q9 NQOR_ECOK1-GGTPYGATTIAGGDGSR | 1.285665 | 0.7034   | 0.781112 | 0.436912 | 1.407726 | 0.9718   | 1.160627 | 0.529237 | 1.314951 | 0.89655  | 1.157731 | 0.590924 |
| sp P0A910 OMPA_ECOLI-AQGVQLTAK         | 0.959051 | 2.43045  | 0.729956 | 0.832176 | 1.391192 | 1.37585  | 0.729956 | 0.660313 | 0.88195  | 1.4457   | 1.765893 | 0.529669 |

|                                     |          |          |          |          |          |         |          |          |          |         |          |          |
|-------------------------------------|----------|----------|----------|----------|----------|---------|----------|----------|----------|---------|----------|----------|
| sp A7ZUK1 RPOB_ECO24-VIVSQLHR       | 2.010348 | 1.464312 | 0.790517 | 0.756965 | 2.123258 | 1.38124 | 0.724602 | 0.676752 | 2.970465 | 0.9182  | 0.931677 | 1.415182 |
| sp A7ZJA8 SUCC_ECO24-EAEEAASK       | 1.88455  | 2.04     | 2.255753 | 2.470528 | 0.587597 | 2.7069  | 1.500051 | 1.78778  | 0.600035 | 2.7069  | 1.710587 | 2.201397 |
| sp A1AC27 SYD_ECOK1-NPMELTDVADLLK   | 4.82533  | 2.8435   | 2.35391  | 0.444562 | 2.29684  | 1.039   | 2.794839 | 0.500764 | 2.037576 | 1.039   | 2.034466 | 0.51233  |
| sp A7ZJD0 GPMA_ECO24-YGDEQVK        | 1.110474 | 1.08885  | 1.084565 | 0.6564   | 0.983864 | 1.2579  | 0.959284 | 0.600336 | 1.419703 | 1.28925 | 1.029073 | 0.348301 |
| sp P0A8N6 SYK2_ECO57-WDLGDIIGAR     | 0.649974 | 0.8325   | 0.098666 | 1.024054 | 0.305192 | 0.8325  | 0.229178 | 0.794606 | 1.679579 | 0.8325  | 0.926636 | 0.643973 |
| sp C4ZPU9 RS20_ECOBW-ANLTAQINK      | 1.880863 | 5.352    | 3.28508  | 0.079846 | 1.607378 | 3.079   | 2.837808 | 0.598459 | 1.287248 | 1.587   | 1.343655 | 1.030021 |
| sp P69832 PTKC_ECO57-VVLAE          | 2.888257 | 0.946603 | 0.671209 | 0.481162 | 1.924104 | 0.7186  | 0.213108 | 0.539732 | 0.458622 | 0.9659  | 0.596933 | 0.391853 |
| sp A7ZTP0 IBPB_ECO24-ITLALAGFR      | 0.947496 | 1.1228   | 0.91142  | 0.647451 | 1.022376 | 0.9505  | 0.709628 | 1.782905 | 0.947496 | 0.7782  | 0.42324  | 1.520035 |
| sp P0A6Z5 HTPG_ECO57-EGPAEDFANQEAIK | 8.985476 | 1.6759   | 1.795236 | 6.376264 | 2.322699 | 2.0397  | 0.826197 | 3.000577 | 2.097894 | 1.8236  | 0.868709 | 1.246529 |
| sp P09394 GLPQ_ECOLI-APWFHHQEGK     | 11.02133 | 0.4808   | 0.46982  | 0.927622 | 3.495326 | 0.50375 | 0.46982  | 1.334    | 0.747745 | 0.5267  | 0.157624 | 1.421203 |
| sp P0A9B3 G3P_ECOL6-VLDLIAHISK      | 0.426834 | 1.59415  | 0.092622 | 0.339579 | 0.423333 | 0.9667  | 0.182764 | 0.489933 | 0.43844  | 2.0997  | 0.910387 | 0.30414  |
| sp P0A910 OMPA_ECOLI-VEIEVK         | 1.143251 | 1.4854   | 2.609757 | 0.75247  | 0.938295 | 1.19695 | 2.486181 | 1.908687 | 0.82606  | 1.2944  | 2.486181 | 1.908687 |
| sp P0A7D6 PURA_ECO57-TGWLDTVAVR     | 0.9547   | 0.686845 | 0.642021 | 0.6142   | 1.292066 | 0.4284  | 0.831784 | 0.6142   | 1.658569 | 0.5854  | 0.791391 | 1.049529 |
| sp A8A0Q4 IHFA_ECOHS-LSGFGNFDLR     | 1.557616 | 0.4025   | 1.208906 | 0.367736 | 1.153351 | 0.71745 | 1.093461 | 0.292475 | 1.13357  | 1.0324  | 1.093461 | 0.354159 |
| sp P0AG68 RS1_ECOL6-ISLGLK          | 0.031581 | 0.8744   | 0.451874 | 2.358954 | 0.119856 | 0.1919  | 1.266239 | 2.109291 | 0.093298 | 0.88295 | 3.069751 | 2.038727 |
| sp A8A5E7 EFG_ECOHS-IATDPFVGNTFFR   | 1.108974 | 0.9503   | 1.243386 | 0.061944 | 1.407947 | 1.0351  | 1.300139 | 0.10016  | 1.230461 | 1.00155 | 1.083006 | 0.085181 |
| sp P0ADZ2 RL23_ECO57-EGQNLDVFGGAE   | 2.053487 | 1.495    | 1.522831 | 0.904965 | 1.976376 | 1.47465 | 1.269744 | 1.854861 | 2.13698  | 1.47465 | 1.269744 | 1.65568  |
| sp P36683 ACNB_ECOLI-MLLPDVTGGDSHTR | 1.165873 | 5.207428 | 0.57062  | 1.351006 | 1.10066  | 6.6493  | 0.884487 | 2.331853 | 1.277573 | 6.6493  | 1.083235 | 0.937882 |
| sp P0ACG0 HNS_ECO57-SLDDFLIK        | 0.80066  | 1.1233   | 1.970781 | 0.835773 | 0.780798 | 0.8982  | 0.862215 | 0.657299 | 0.851774 | 1.1233  | 0.862215 | 0.604914 |

|                                           |          |          |          |          |          |          |          |          |          |         |          |          |
|-------------------------------------------|----------|----------|----------|----------|----------|----------|----------|----------|----------|---------|----------|----------|
| sp B7M1N3 RL4_ECO8A-DAQSALTVSETTFGR       | 2.225894 | 0.279    | 1.722989 | 0.397348 | 2.232502 | 0.43805  | 0.513604 | 0.424499 | 2.297116 | 0.5971  | 0.816071 | 0.458198 |
| sp P0AC41 SDHA_ECOLI-NFGGEQAAR            | 3.227202 | 3.3145   | 0.439241 | 1.779261 | 3.578458 | 2.2509   | 0.475159 | 1.569055 | 3.896956 | 2.2509  | 0.777167 | 1.253241 |
| sp P0AG32 RHO_ECO57-KEELLTTQEELQK         | 0.414745 | 0.5024   | 0.4429   | 2.227238 | 0.705016 | 0.74605  | 0.657672 | 1.096753 | 0.881348 | 0.84855 | 1.217897 | 0.748629 |
| sp P0A9L3 FKBB_ECOLI-LIDGTVFDSSVAR        | 1.754828 | 0.8421   | 6.291335 | 0.081841 | 1.071581 | 1.24755  | 1.14186  | 0.116947 | 1.317011 | 1.2801  | 1.253324 | 0.166142 |
| sp P0A7W3 RS5_ECO57-AVLEVAGVHNVLAK        | 0.894346 | 0.5793   | 3.106592 | 0.142741 | 0.69583  | 0.5793   | 2.945277 | 0.204486 | 0.574921 | 0.404   | 2.548451 | 0.272813 |
| sp P06959 ODP2_ECOLI-AEAAPAATGGGIPGMLPWPK | 0.945733 | 2.6085   | 1.139852 | 0.235    | 0.906701 | 1.132    | 1.22235  | 0.220383 | 0.82523  | 1.132   | 1.140631 | 0.406134 |
| sp P0ACA3 SSPA_ECOLI-LYMHR                | 0.344583 | 1.604737 | 0.478006 | 0.633464 | 0.387108 | 1.521104 | 0.137278 | 0.552515 | 4.445915 | 2.22245 | 0.573742 | 0.946461 |
| sp B7L4J7 RL5_ECO55-LHDYYK                | 0.554686 | 1.264214 | 3.893516 | 1.214145 | 0.708439 | 0.8195   | 5.996328 | 1.214145 | 1.086451 | 0.6177  | 1.123013 | 0.887421 |
| sp P00509 AAT_ECOLI-VGACTLVAADSETVDR      | 0.29869  | 0.6734   | 0.792845 | 0.614265 | 0.260003 | 0.6734   | 0.887147 | 0.750927 | 0.305124 | 0.42175 | 0.887147 | 0.861806 |
| sp P0AGF0 SUCD_ECOL6-MGHAGAIAGGK          | 0.65893  | 0.7205   | 1.02538  | 0.652339 | 0.196646 | 0.5016   | 1.302797 | 2.732427 | 0.632681 | 0.7601  | 1.117381 | 1.442443 |
| sp B1IPL0 IF3_ECOLC-LTGLEGEQLGIVSLR       | 0.983892 | 0.63905  | 1.418698 | 0.547036 | 0.796371 | 0.63905  | 1.27734  | 3.55719  | 0.663762 | 0.9584  | 2.079579 | 1.027451 |
| sp P0AC41 SDHA_ECOLI-DASESDVEASLDR        | 0.97583  | 0.9368   | 1.293451 | 0.854073 | 0.900729 | 0.9584   | 1.389987 | 0.949482 | 0.900729 | 0.9584  | 1.389987 | 0.949482 |
| sp B1XB97 HSLU_ECODH-NILMIGPTGVGK         | 1.171214 | 0.98615  | 0.301173 | 3.49048  | 1.304093 | 1.2679   | 0.301173 | 3.49048  | 1.221311 | 1.30005 | 0.157844 | 3.65597  |
| sp P0AEQ3 GLNH_ECOLI-ADAVLHDTPNILYFIK     | 0.922465 | 7.0443   | 0.495745 | 1.401814 | 5.518439 | 7.0443   | 0.123811 | 3.695392 | 2.732099 | 6.26305 | 0.123811 | 3.334193 |
| sp P0ACG0 HNS_ECO57-AMDEQGK               | 0.277667 | 1.2422   | 0.605146 | 0.816622 | 0.68211  | 0.7259   | 1.055695 | 0.652869 | 0.759475 | 1.3656  | 1.080654 | 0.772901 |
| sp P33602 NUOG_ECOLI-DAAPDATFR            | 0.543038 | 0.7986   | 1.08056  | 1.60595  | 0.952418 | 0.7986   | 0.857423 | 1.336795 | 0.952418 | 1.00205 | 0.97368  | 1.336795 |
| sp P0A6Y9 DNAK_ECOL6-DAEANAADR            | 3.379462 | 0.6692   | 0.461325 | 6.513747 | 3.813074 | 0.78535  | 0.548668 | 5.962226 | 6.38797  | 0.6954  | 0.534604 | 6.513747 |
| sp P19926 AGP_ECOLI-FDSVLNEAVK            | 1.47     | 0.8448   | 1.582332 | 1.027789 | 1.052466 | 0.8448   | 0.834412 | 1.027789 | 1.164927 | 0.87455 | 1.217753 | 0.56411  |
| sp A7ZTU4 ATPB_ECO24-GLDVK                | 0.318956 | 0.68755  | 3.040157 | 0.303089 | 3.223094 | 0.82485  | 5.448477 | 1.068302 | 1.846666 | 0.8234  | 1.63403  | 1.070464 |



|                                          |          |          |          |          |          |          |          |          |          |          |          |          |
|------------------------------------------|----------|----------|----------|----------|----------|----------|----------|----------|----------|----------|----------|----------|
| sp B7L4J7 RL5_ECO55-EQIIFPEIDYDK         | 2.141313 | 1.42725  | 0.744558 | 0.414647 | 1.539642 | 1.4152   | 0.954234 | 0.768423 | 1.570861 | 1.4184   | 0.912474 | 0.572232 |
| sp P15254 PUR4_ECOLI-DNAAVMEGSEVGR       | 4.561462 | 1.1716   | 0.644605 | 3.875935 | 4.845311 | 0.722    | 0.581164 | 0.449492 | 6.120219 | 0.722    | 1.004283 | 6.875225 |
| sp P0A9G6 ACEA_ECOLI-VQQPEFAAAK          | 0.509173 | 0.55715  | 5.554111 | 0.488408 | 1.053478 | 0.6027   | 1.50144  | 0.464753 | 1.053478 | 0.574    | 1.02477  | 0.450285 |
| sp A8A466 PGK_ECOHS-MTDLDLAGK            | 1.231847 | 0.5021   | 0.736901 | 1.764525 | 1.48168  | 0.9268   | 0.653085 | 0.935697 | 1.234259 | 0.7621   | 0.628044 | 1.075482 |
| sp P0A910 OMPA_ECOLI-DGSVVVLGYTDR        | 1.133637 | 0.7447   | 1.032544 | 1.285779 | 1.155994 | 0.99435  | 0.727388 | 1.344975 | 1.058907 | 0.9761   | 0.732883 | 1.383802 |
| sp B7NMH9 NFUA_ECO7I-VEYMLQSQINPQLAGHGGR | 1.288406 | 1.276501 | 0.98091  | 1.651687 | 1.288406 | 1.046556 | 0.711589 | 1.39206  | 1.288406 | 1.077603 | 0.711589 | 1.39206  |
| sp P00968 CARB_ECOLI-NNEVYLIEVNPR        | 0.755073 | 1.0142   | 0.765794 | 0.255011 | 2.017588 | 0.9916   | 0.255207 | 0.729298 | 0.960311 | 0.70635  | 0.661603 | 0.815643 |
| sp P37902 GLTI_ECOLI-LMDDTIAQVQTSGEAEK   | 0.335516 | 1.0734   | 0.78038  | 0.085856 | 0.183259 | 0.90835  | 0.864133 | 0.094291 | 0.447787 | 0.90835  | 0.741835 | 0.096692 |
| sp P0A9P2 DLDH_ECO57-ALAEHGIVFGPEK       | 0.852178 | 0.64035  | 8.150321 | 3.236681 | 0.426436 | 0.57815  | 2.985617 | 3.231319 | 0.615975 | 0.7934   | 2.09502  | 3.155088 |
| sp Q47452 PCOA_ECOLX-VTADALGR            | 3.593818 | 2.968503 | 0.086807 | 1.283924 | 3.608358 | 2.876952 | 0.193777 | 1.174796 | 3.593818 | 3.6407   | 0.160021 | 0.97898  |
| sp A7ZSL4 EFTU1_ECO24-TTLTAAITTVLAK      | 2.473814 | 1.265713 | 2.321022 | 0.125116 | 2.912616 | 1.249395 | 1.862734 | 0.218814 | 3.243487 | 1.7737   | 1.198918 | 0.052874 |
| sp P0ABC8 HFLK_ECO57-GGNLMVPLDQMLK       | 4.061917 | 0.734    | 0.152971 | 0.508109 | 4.086173 | 0.734    | 0.168955 | 0.306589 | 3.831815 | 1.626    | 0.74084  | 0.941754 |
| sp P0A9S3 GATD_ECOLI-HQDEVR              | 1.859608 | 1.4719   | 0.928545 | 0.445085 | 1.859608 | 1.4719   | 0.928545 | 0.374547 | 2.119059 | 1.4719   | 0.988914 | 0.30372  |
| sp P0AG68 RS1_ECOL6-HEAWITLAK            | 0.894324 | 0.6791   | 2.131046 | 2.772878 | 1.185948 | 0.6791   | 5.400476 | 2.09343  | 1.309472 | 0.6791   | 5.400476 | 2.09343  |
| sp A7ZPU1 UPP_ECO24-LVSNIDER             | 0.674907 | 0.746    | 1.615262 | 1.154574 | 1.856194 | 0.9254   | 1.870977 | 1.398631 | 1.68255  | 0.9254   | 1.870977 | 1.398631 |
| sp P00579 RPOD_ECOLI-AATHDVLGLTAR        | 0.701714 | 0.491123 | 0.90128  | 4.408731 | 0.607667 | 0.2046   | 0.53063  | 6.1764   | 0.486004 | 0.16095  | 0.567219 | 5.377279 |
| sp B1IQV7 PNP_ECOLC-AAVAGIAMGLVK         | 0.987458 | 0.2083   | 0.270139 | 3.028033 | 1.260559 | 0.2083   | 0.334669 | 2.099206 | 0.958155 | 1.4959   | 0.397415 | 0.897672 |
| sp P0AFG5 ODO1_ECO57-LALDFR              | 2.8081   | 0.2734   | 1.380849 | 44.53903 | 4.349515 | 2.3194   | 1.496126 | 2.443034 | 0.411631 | 2.3194   | 0.507121 | 6.629154 |
| sp B7M6B0 TOLB_ECO8A-FPAWSPYL            | 1.497782 | 0.931969 | 0.215851 | 0.844693 | 1.106276 | 1.317807 | 0.223434 | 1.183719 | 1.158138 | 1.461685 | 0.286377 | 0.864326 |

|                                            |          |          |          |          |          |         |          |          |          |         |          |          |
|--------------------------------------------|----------|----------|----------|----------|----------|---------|----------|----------|----------|---------|----------|----------|
| sp B7M1N4 RL3_ECO8A-MAGQMGNER              | 0.414946 | 1.8488   | 1.666791 | 0.362782 | 0.719208 | 1.43915 | 4.72685  | 0.279498 | 0.658498 | 0.8122  | 8.393455 | 1.033731 |
| sp K0BE10 TAL_ECO1E-AQQIVDATDK             | 0.736945 | 1.1389   | 0.684553 | 0.753695 | 0.505739 | 1.25165 | 0.861534 | 0.9222   | 0.703172 | 1.3299  | 0.861534 | 1.074227 |
| sp B5Z3U4 TIG_ECO5E-SELVNVAK               | 2.622613 | 0.99095  | 0.28858  | 0.867994 | 1.134845 | 0.99095 | 0.284715 | 0.71856  | 0.643926 | 0.8674  | 0.513982 | 0.910117 |
| sp B7MZ75 ENO_ECO81-SGETEDATIADLAVGTAAGQIK | 0.798024 | 0.4738   | 1.81685  | 2.391785 | 0.661023 | 0.4738  | 1.704372 | 1.402242 | 1.197335 | 0.6477  | 1.350935 | 1.382583 |
| sp P0A9B3 G3P_ECOL6-AAAEGEMK               | 1.245317 | 0.8499   | 0.873131 | 0.937372 | 1.229269 | 0.9149  | 0.932808 | 0.971022 | 1.178794 | 0.9344  | 1.072977 | 0.899202 |
| sp A8A5E7 EFG_ECOHS-MGLALGR                | 2.503912 | 0.926812 | 1.334316 | 2.311564 | 4.378745 | 1.0897  | 1.071286 | 2.842396 | 2.082243 | 0.8711  | 2.000256 | 1.430093 |
| sp P0AE10 AHPC_ECO57-AAQYVASHPGEVCPAK      | 0.652878 | 0.5539   | 0.719638 | 0.746626 | 1.809534 | 1.18865 | 0.827604 | 0.483775 | 1.17047  | 1.4729  | 0.881909 | 0.784487 |
| sp P0A7B0 IPYR_ECO57-DVNDLPELLK            | 1.827514 | 0.98255  | 0.784784 | 0.960253 | 1.869655 | 1.1423  | 1.014297 | 0.566941 | 1.262599 | 1.1423  | 0.998002 | 0.568966 |
| sp P63285 CLPB_ECO57-QLEAATQLEGK           | 0.690607 | 1.1107   | 1.29306  | 0.468612 | 0.677012 | 0.949   | 2.734439 | 0.393796 | 0.923332 | 0.9458  | 1.837835 | 0.330974 |
| sp A8A750 KATG_ECOHS-VDLLNQHSNR            | 1.616792 | 0.571354 | 1.021287 | 1.460195 | 0.873655 | 0.7342  | 0.573128 | 2.794277 | 0.660545 | 0.7342  | 0.573128 | 2.794277 |
| sp A7ZMI4 RL20_ECO24-ASVEIDR               | 1.443073 | 1.321736 | 3.224097 | 8.159213 | 0.284532 | 0.91455 | 2.501171 | 5.345199 | 0.284532 | 1.4407  | 6.08532  | 6.66661  |
| sp B1XB97 HSLU_ECODH-LVNPEELK              | 0.547595 | 0.4308   | 1.091621 | 0.902045 | 0.547595 | 0.41945 | 0.737007 | 0.881533 | 1.362188 | 0.41945 | 2.104274 | 1.033109 |
| sp P69784 PTGA_ECOL6-STLTPVVISNMDEIK       | 0.479178 | 0.951    | 1.044031 | 0.24094  | 0.584421 | 1.0027  | 0.752667 | 0.446913 | 0.718822 | 0.792   | 0.659671 | 0.458984 |
| sp P0ACF1 DBHA_ECOL6-EGDAVQLVGFGTK         | 0.827537 | 2.8582   | 1.017754 | 0.458631 | 0.97382  | 1.27325 | 1.14585  | 0.549231 | 0.979781 | 1.19005 | 0.624238 | 0.561724 |
| sp C4ZRQ8 DAPD_ECOBW-FADYDEAR              | 4.106672 | 0.2347   | 0.106106 | 0.530202 | 17.8008  | 0.43535 | 0.12294  | 1.128703 | 3.721367 | 0.636   | 0.095216 | 0.568538 |
| sp P31979 NUOF_ECOLI-AIAEATEAGLLGK         | 2.395658 | 1.075012 | 0.364897 | 0.949535 | 5.911846 | 0.4081  | 0.527289 | 0.64962  | 3.285601 | 0.39585 | 0.435052 | 0.64962  |
| sp P36683 ACNB_ECOLI-VEQAFELTDASAER        | 0.537323 | 2.1063   | 2.798001 | 1.343516 | 0.732947 | 2.1063  | 1.463358 | 0.372327 | 0.76296  | 1.4905  | 1.425289 | 0.398927 |
| sp P0A6Y9 DNAK_ECOL6-KQVEEAGDK             | 3.233962 | 0.6405   | 0.067557 | 0.777959 | 4.344317 | 0.6407  | 0.065124 | 0.693779 | 3.233962 | 0.6407  | 0.367616 | 0.707091 |
| sp Q1R6A9 RL13_ECOOUT-VIEIAVK              | 2.946667 | 0.36     | 1.213182 | 0.850488 | 2.378171 | 1.0302  | 1.878543 | 1.503222 | 2.378171 | 0.4367  | 1.765637 | 1.503222 |

|                                         |          |          |          |          |          |          |          |          |          |          |          |          |
|-----------------------------------------|----------|----------|----------|----------|----------|----------|----------|----------|----------|----------|----------|----------|
| sp P25553 ALDA_ECOLI-VCLELGK            | 0.446721 | 0.572738 | 0.561732 | 9.224406 | 0.478988 | 0.790425 | 1.120714 | 9.165412 | 0.470189 | 0.873975 | 0.75334  | 1.554147 |
| sp P0AEB2 DACA_ECOLI-EFASEPVWFGSDR      | 1.691713 | 0.925667 | 0.387466 | 0.685873 | 1.132761 | 1.1306   | 0.441473 | 0.423684 | 1.435223 | 1.3613   | 0.602219 | 0.64707  |
| sp A7ZPS1 PUR7_ECO24-AAGSLVK            | 2.313526 | 1.3046   | 1.934662 | 5.631949 | 2.83098  | 1.12255  | 0.256046 | 4.544713 | 3.687231 | 1.1083   | 0.594427 | 5.521393 |
| sp P00968 CARB_ECOLI-EVIPPYYSVK         | 1.343178 | 0.8567   | 0.196198 | 0.329313 | 0.776367 | 0.8919   | 0.609988 | 0.600154 | 1.049145 | 1.2502   | 0.741118 | 0.64263  |
| sp P0A807 RRF_ECO57-MISDIR              | 0.401744 | 0.3746   | 0.075393 | 3.187454 | 1.15425  | 1.4567   | 0.181329 | 2.860459 | 1.15425  | 1.4567   | 0.116629 | 2.860459 |
| sp A1AF92 GCSP_ECOK1-DDEILTHPVFNR       | 0.73483  | 0.68165  | 0.655882 | 1.451346 | 0.73483  | 0.899    | 0.683022 | 1.181062 | 0.739164 | 0.9752   | 0.832966 | 1.474251 |
| sp A7ZUK1 RPOB_ECO24-GEVDDIDHLGNR       | 1.746534 | 0.8284   | 0.970532 | 2.371624 | 1.746534 | 2.2447   | 1.917047 | 0.751511 | 1.746534 | 0.8279   | 1.988956 | 0.650291 |
| sp A7ZQ54 GRPE_ECO24-IANLEAQLAEAQTR     | 0.779807 | 1.2598   | 1.779831 | 1.512861 | 0.677686 | 0.9892   | 1.602544 | 1.165081 | 0.127563 | 0.9892   | 1.617624 | 1.512861 |
| sp A8A750 KATG_ECOHS-VLGANFDGSK         | 1.666751 | 0.8248   | 1.754499 | 0.999058 | 0.866314 | 1.3198   | 0.939289 | 0.969665 | 1.020217 | 1.3198   | 0.895778 | 1.402695 |
| sp B1LNK7 GLYA_ECOSM-GGSEELYK           | 3.857723 | 4.57615  | 2.100472 | 0.863996 | 4.299947 | 1.2086   | 2.100472 | 2.591077 | 6.642555 | 1.8727   | 2.100472 | 0.650013 |
| sp B1X8H5 SYGB_ECODH-VADISLLQ           | 0.1107   | 1.2317   | 0.603589 | 0.394519 | 0.1107   | 1.2317   | 0.603589 | 0.394519 | 0.478545 | 4.63875  | 0.603589 | 0.35882  |
| sp B7UIL4 RS2_ECO27-LKDLETQSQDGTFDK     | 1.591009 | 0.4314   | 0.091236 | 0.294966 | 1.42519  | 0.7505   | 1.140269 | 0.584682 | 1.801876 | 0.7505   | 1.178691 | 0.990622 |
| sp B7LD85 SYS_ECO55-AELDALQAEIR         | 0.488541 | 2.92715  | 1.226693 | 1.435584 | 0.770193 | 2.92715  | 1.670365 | 1.132106 | 1.074922 | 2.2683   | 1.226693 | 0.523946 |
| sp P0ADG8 IMDH_ECO57-VGAAVGAGAGNEER     | 1.656764 | 3.4125   | 0.959535 | 0.067042 | 1.656764 | 3.4125   | 1.387961 | 0.053247 | 1.752873 | 3.4125   | 2.012341 | 0.168619 |
| sp P00579 RPOD_ECOLI-SHATAQEEILK        | 1.450944 | 1.396937 | 1.76416  | 2.474217 | 0.457387 | 1.462099 | 0.949174 | 1.275786 | 0.981874 | 1.7138   | 0.949174 | 0.617018 |
| sp A7ZP90 NUON_ECO24-GPDADSLFSYR        | 2.896461 | 0.739    | 1.055091 | 0.749009 | 2.600801 | 0.85755  | 1.749393 | 0.655495 | 3.788815 | 0.9761   | 1.183602 | 0.841307 |
| sp B7MIU7 RS16_ECO45-VGFFNPIASEK        | 0.527736 | 0.7148   | 1.648576 | 0.300424 | 0.688695 | 1.01185  | 1.075837 | 0.239912 | 0.67272  | 0.8764   | 1.131619 | 0.234269 |
| sp B7UJP9 YAJQ_ECO27-GIEGSSLDVPENIVHSGK | 0.903997 | 2.1095   | 1.858674 | 1.318468 | 1.35881  | 0.3579   | 0.540304 | 0.43217  | 1.4375   | 0.3579   | 0.575896 | 0.43217  |
| sp P77774 BAMB_ECOLI-ALNADDGK           | 0.99218  | 1.5005   | 1.248531 | 0.761206 | 1.801606 | 0.9095   | 0.534017 | 0.785992 | 3.297724 | 0.9095   | 1.095427 | 0.855341 |

|                                     |          |          |          |          |          |          |          |          |          |          |          |          |
|-------------------------------------|----------|----------|----------|----------|----------|----------|----------|----------|----------|----------|----------|----------|
| sp A1A7M1 BAMA_ECOK1-DEVPWWNVVGDR   | 2.657684 | 2.20855  | 1.945672 | 0.571084 | 1.956044 | 2.1379   | 1.505471 | 0.752566 | 4.782302 | 2.12685  | 1.291835 | 0.554204 |
| sp A8A750 KATG_ECOHS-FLNDPQAFNEAFAR | 2.016575 | 0.7398   | 0.535535 | 2.006537 | 2.998085 | 0.916    | 0.535853 | 1.247963 | 2.016575 | 0.916    | 0.494874 | 0.503487 |
| sp B5YTN8 RL2_ECO5E-LEYPDNR         | 1.13937  | 0.9865   | 1.289804 | 1.824226 | 1.079293 | 1.6852   | 1.114269 | 1.824226 | 1.104644 | 1.3289   | 1.435437 | 2.586859 |
| sp Q19NJ4 CH602_ECOK1-LAGGVAVIK     | 0.260759 | 0.6154   | 1.837737 | 0.823462 | 0.38553  | 0.9401   | 2.180007 | 0.977911 | 0.44538  | 0.9401   | 1.984245 | 0.708145 |
| sp Q1R626 RL18_ECOUT-AIAEQLK        | 0.376391 | 0.1854   | 0.11477  | 0.268876 | 0.400799 | 1.1038   | 0.157436 | 0.676625 | 0.425185 | 1.1038   | 0.157436 | 0.803338 |
| sp P00968 CARB_ECOLI-IMVLGGGPNR     | 0.678706 | 1.181589 | 3.787778 | 1.019909 | 0.753172 | 1.194959 | 3.365701 | 1.109413 | 3.760501 | 1.235132 | 0.786071 | 0.718761 |
| sp A7ZUD3 TPIS_ECO24-ESDELIAK       | 1.817826 | 1.080334 | 0.602177 | 1.639911 | 2.483865 | 1.040062 | 1.877049 | 1.738735 | 2.735407 | 1.1515   | 1.131793 | 1.521657 |
| sp P33602 NUOG_ECOLI-ADAVVVLENDLHR  | 1.267578 | 0.859    | 1.28241  | 0.803348 | 1.046131 | 0.8159   | 0.987101 | 0.910985 | 1.216367 | 0.74905  | 1.414002 | 0.690821 |
| sp P63285 CLPB_ECO57-IDMSEFMEK      | 0.786408 | 1.376    | 0.466372 | 2.13314  | 1.438002 | 1.46455  | 0.351072 | 2.499469 | 1.476201 | 1.32     | 0.377556 | 1.477853 |
| sp B1IU2 SYA_ECOLC-AVEDLVNTQIR      | 1.998769 | 1.553    | 0.851852 | 1.150845 | 2.032328 | 0.9842   | 0.719214 | 1.102109 | 2.032328 | 0.9842   | 0.611101 | 1.021537 |
| sp A7ZST1 PCKA_ECO24-AETLAK         | 1.398184 | 1.58515  | 1.11425  | 4.242034 | 1.037215 | 1.0791   | 1.68045  | 4.696029 | 1.639037 | 1.0791   | 1.159081 | 3.82002  |
| sp P0A910 OMPA_ECOLI-DNTWYTGAK      | 0.60886  | 1.09625  | 0.363054 | 0.548557 | 0.712785 | 1.1805   | 0.513243 | 0.701699 | 1.359713 | 1.09625  | 0.444898 | 0.831837 |
| sp B7LE54 FABA_ECO55-ALGVGEVK       | 1.038578 | 0.4167   | 0.558813 | 0.810061 | 1.073944 | 0.5549   | 0.613671 | 0.781256 | 1.021701 | 0.6427   | 0.654115 | 0.623385 |
| sp B1IQV7 PNP_ECOLC-EIMQVALNQAK     | 4.07602  | 1.38275  | 1.001499 | 0.306849 | 4.07602  | 1.45385  | 0.797226 | 2.775724 | 3.813093 | 0.5456   | 0.778556 | 1.746397 |
| sp A8A6H0 TNAE_ECOHS-GDEAYSGSR      | 4.317822 | 2.0847   | 1.202843 | 1.205396 | 3.018868 | 1.8125   | 0.742453 | 1.45961  | 3.018868 | 1.7195   | 0.911848 | 1.727101 |
| sp P0A9B3 G3P_ECOL6-KHITAGAK        | 1.080442 | 0.6926   | 1.056691 | 0.280364 | 0.846033 | 1.1308   | 1.964091 | 0.346066 | 0.846033 | 0.6926   | 1.434066 | 0.262818 |
| sp A7ZSL4 EFTU1_ECO24-EHILLGR       | 0.432057 | 0.4311   | 2.550632 | 7.85983  | 1.581367 | 0.70035  | 1.783156 | 1.02607  | 1.581367 | 0.70035  | 0.756953 | 0.899744 |
| sp B1LNK7 GLYA_ECOSM-EADAALGR       | 0.386315 | 0.59635  | 1.169903 | 2.289534 | 0.492266 | 0.8877   | 0.833907 | 2.68393  | 0.492266 | 1.3577   | 0.979817 | 1.663214 |
| sp P00509 AAT_ECOLI-AIWEQELTDMR     | 0.988175 | 0.5932   | 0.691859 | 1.198873 | 0.809983 | 0.56695  | 1.685144 | 0.897102 | 0.923514 | 0.5932   | 1.604966 | 0.889275 |

|                                              |          |          |          |          |          |          |          |          |          |         |          |          |
|----------------------------------------------|----------|----------|----------|----------|----------|----------|----------|----------|----------|---------|----------|----------|
| sp A8A466 PGK_ECOHS-LTVLDSLK                 | 0.403834 | 3.71045  | 0.296695 | 1.890864 | 0.628018 | 2.60525  | 0.569844 | 1.630095 | 1.698886 | 2.5902  | 0.90541  | 1.361209 |
| sp A7ZPS1 PUR7_ECO24-LGVQLD                  | 0.73059  | 0.4614   | 0.179123 | 2.794118 | 0.73059  | 0.4614   | 0.179123 | 3.433092 | 0.73059  | 0.4614  | 0.179123 | 2.904725 |
| sp P0AC41 SDHA_ECOLI-EFDAVVIGAGGAGMR         | 1.670993 | 1.5423   | 0.666704 | 0.571981 | 0.847497 | 1.14315  | 0.58665  | 2.489993 | 1.494528 | 1.1084  | 0.393683 | 2.333875 |
| sp P0AD62 KPYK1_ECO57-LDAPLIVVATQGK          | 0.647192 | 0.6117   | 0.456622 | 1.006946 | 0.5797   | 0.5453   | 0.427374 | 1.20899  | 0.685751 | 0.6117  | 0.520776 | 1.133012 |
| sp A7ZSD0 MDH_ECO24-FFSQPLLLGK               | 1.137911 | 1.3541   | 1.25889  | 2.130029 | 0.503816 | 0.8793   | 1.511979 | 0.545288 | 0.590123 | 0.91795 | 1.339691 | 0.298032 |
| sp P63285 CLPB_ECO57-IINGEVPEGLK             | 1.790528 | 0.7314   | 0.335941 | 0.588489 | 1.978028 | 0.66295  | 0.575206 | 0.563597 | 1.978028 | 0.66295 | 0.629481 | 0.669885 |
| sp P00968 CARB_ECOLI-FQHAYER                 | 0.236526 | 0.9146   | 0.651924 | 0.365296 | 0.241455 | 0.9146   | 0.516796 | 0.365296 | 0.403286 | 0.9146  | 0.553452 | 0.264357 |
| sp P0AB78 KBL_ECO57-YANNDMQELEAR             | 1.10758  | 1.439735 | 0.763931 | 0.863941 | 0.666669 | 1.6338   | 0.689815 | 0.815976 | 0.618262 | 2.3955  | 1.061839 | 0.730415 |
| sp P0A9A7 FTSZ_ECOL6-QVQQPVMDR               | 0.498492 | 1.7791   | 0.695819 | 1.671916 | 0.498492 | 1.0957   | 0.695819 | 7.873579 | 0.498492 | 1.0957  | 0.771789 | 1.743082 |
| sp A7ZNH9 YEEX_ECO24-VDDYIHK                 | 1.810871 | 1.06075  | 0.071988 | 0.343377 | 3.664116 | 0.7673   | 0.071988 | 1.116205 | 2.505828 | 0.8874  | 0.179216 | 1.089397 |
| sp A8A750 KATG_ECOHS-SNPLGEDFDYR             | 0.746234 | 0.90305  | 0.767458 | 2.342285 | 0.602592 | 1.008403 | 0.767458 | 2.013914 | 0.657004 | 1.4731  | 1.922202 | 0.972623 |
| sp A7ZMI4 RL20_ECO24-ILADIAVFDK              | 0.929171 | 0.6434   | 0.693333 | 0.06865  | 0.957388 | 0.5917   | 0.713178 | 0.07331  | 0.874805 | 0.3991  | 0.683164 | 0.286972 |
| sp P27302 TKT1_ECOLI-TIIFGSPNK               | 4.564199 | 1.266107 | 1.306295 | 0.823403 | 2.475264 | 0.9742   | 4.713556 | 1.526202 | 2.795808 | 1.1785  | 5.500567 | 0.096534 |
| sp P0A910 OMPA_ECOLI-AQSVVDYLSK              | 1.741559 | 1.0536   | 2.407871 | 0.724191 | 1.182709 | 0.9936   | 0.806513 | 0.992606 | 1.365666 | 0.86875 | 0.779528 | 0.992995 |
| sp P60624 RL24_ECOLI-DDEVIVLTGK              | 0.402648 | 7.2471   | 0.151709 | 0.912293 | 0.519742 | 7.2471   | 0.064168 | 1.556537 | 0.443134 | 7.2471  | 0.171049 | 1.556537 |
| sp A7ZPA8 YFBU_ECO24-VTFLGFDAATEAR           | 0.212391 | 1.2289   | 0.595632 | 0.810506 | 0.384256 | 1.2289   | 0.537703 | 0.90988  | 0.729392 | 1.08385 | 0.537703 | 0.686476 |
| sp P23869 PPIB_ECOLI-NFLDYCR                 | 1.433482 | 1.710275 | 1.051077 | 0.950051 | 1.826686 | 1.6134   | 1.123802 | 1.668485 | 1.826686 | 1.6134  | 5.311573 | 1.668485 |
| sp B7NF50 ATPA_ECOLU-DHAPLMQEINQTTGGYNDEIEGK | 1.005554 | 2.4579   | 0.745163 | 2.82741  | 0.796593 | 2.4579   | 0.352703 | 1.307212 | 0.572992 | 0.7572  | 0.202919 | 1.307212 |

|                                         |          |          |          |          |          |          |          |          |          |         |          |          |
|-----------------------------------------|----------|----------|----------|----------|----------|----------|----------|----------|----------|---------|----------|----------|
| sp A7ZTU4 ATPB_ECO24-AAPSYEELSNSQELLETK | 0.380161 | 0.2228   | 0.595344 | 0.676727 | 0.536108 | 1.1106   | 0.297773 | 1.881392 | 0.536108 | 1.305   | 0.922294 | 1.953217 |
| sp A7ZTU4 ATPB_ECO24-WAIHR              | 0.999267 | 0.9655   | 1.882677 | 2.79499  | 1.316393 | 0.9655   | 2.765288 | 2.79499  | 3.178358 | 0.9655  | 3.136656 | 1.796436 |
| sp B1IT06 RS6_ECOLC-FNDAVIR             | 1.456601 | 0.185    | 11.63959 | 8.468154 | 0.748199 | 0.6749   | 2.894356 | 4.780624 | 1.209889 | 0.6749  | 2.045801 | 0.894816 |
| sp A1AIG0 RPOC_ECOK1-IPQESGGTK          | 1.36312  | 1.16145  | 2.216771 | 0.240231 | 1.119833 | 0.8565   | 1.634199 | 0.317321 | 1.135598 | 1.28015 | 1.733577 | 0.32358  |
| sp P0A910 OMPA_ECOLI-HFTLK              | 2.022956 | 5.1719   | 1.068978 | 1.1949   | 1.339014 | 5.1621   | 1.068978 | 0.688024 | 2.061644 | 5.1621  | 1.697079 | 1.950097 |
| sp P08200 IDH_ECOLI-TVTYDFER            | 0.591759 | 1.060747 | 3.021595 | 1.538732 | 0.551282 | 1.021856 | 2.669734 | 1.059657 | 0.573238 | 0.5443  | 1.450832 | 2.17923  |
| sp P0A7B0 IPYR_ECO57-ESGALFVDR          | 7.524718 | 0.778443 | 0.536034 | 0.84525  | 5.76301  | 0.773887 | 0.407767 | 0.84525  | 1.860845 | 0.7771  | 0.418439 | 1.979593 |
| sp P0A6Y9 DNAK_ECOL6-HMNIK              | 5.259117 | 0.1961   | 1.564174 | 0.350757 | 0.842138 | 1.3294   | 7.53511  | 0.641665 | 0.652537 | 0.2612  | 1.438098 | 0.341235 |
| sp B7L4J7 RL5_ECO55-ALLAAFDPFPR         | 1.885785 | 0.924699 | 0.601369 | 0.595994 | 1.775783 | 0.832513 | 0.627046 | 0.854987 | 1.729649 | 0.3864  | 0.822786 | 0.226586 |
| sp P63285 CLPB_ECO57-RLDMLNEELSDK       | 1.198749 | 0.997645 | 0.173537 | 1.529355 | 0.584579 | 0.585168 | 0.579032 | 0.47151  | 1.233187 | 0.24445 | 0.579032 | 0.920217 |
| sp P06959 ODP2_ECOLI-FGEIEEVELGR        | 17.13912 | 1.712908 | 0.553083 | 7.827221 | 2.855578 | 1.60282  | 0.802457 | 5.60573  | 2.683788 | 1.5498  | 1.061408 | 3.678303 |
| sp A1AHU3 ILVD_ECOK1-VSDSQSDQVER        | 1.449931 | 1.1325   | 1.588766 | 0.803659 | 1.456333 | 1.04515  | 1.161944 | 0.560544 | 1.631459 | 1.04515 | 1.221989 | 0.794996 |
| sp P0A9S3 GATD_ECOLI-SVTAIDISSEK        | 0.296163 | 1.8789   | 0.258846 | 0.67301  | 0.2927   | 1.16765  | 0.427868 | 0.875728 | 0.260827 | 1.16765 | 1.056998 | 0.831413 |
| sp A7ZNT3 SYM_ECO24-DAPYFGFEIPNAPGK     | 3.275137 | 0.8283   | 1.205421 | 0.140555 | 2.494178 | 0.80445  | 0.88891  | 0.202151 | 1.709749 | 0.7806  | 1.728038 | 0.359853 |
| sp P00954 SYW_ECOLI-NNVIGLLEDPK         | 0.709752 | 2.2163   | 0.591067 | 0.10355  | 0.796584 | 2.2163   | 0.522909 | 0.10355  | 3.187444 | 1.8404  | 0.856423 | 0.480025 |
| sp A7ZUK1 RPOB_ECO24-GETQLTPEEK         | 1.523482 | 1.7861   | 0.833062 | 0.342706 | 1.120775 | 1.0916   | 0.867266 | 0.880091 | 1.154278 | 1.0916  | 0.857886 | 0.710168 |
| sp C4ZRQ8 DAPD_ECOBW-INDNQVIEGAESR      | 1.336259 | 0.4783   | 0.776812 | 1.380803 | 0.840939 | 0.4783   | 0.554853 | 1.557266 | 1.679706 | 0.4783  | 0.797845 | 0.927181 |
| sp P0AC39 ASPA_ECOL6-GEYQYLNPNHDVVK     | 1.029638 | 1.561    | 0.969168 | 0.356553 | 1.055629 | 1.5724   | 0.961899 | 0.379467 | 1.043093 | 1.561   | 0.896151 | 0.370221 |
| sp B6HYN0 MIAB_ECOSE-GENYDGTGGSFADLLR   | 2.803222 | 0.622082 | 0.888792 | 1.218757 | 1.70915  | 0.8179   | 0.703157 | 2.281765 | 1.628147 | 0.8179  | 0.693779 | 2.239201 |

|                                                |          |          |          |          |          |          |          |          |          |          |          |          |
|------------------------------------------------|----------|----------|----------|----------|----------|----------|----------|----------|----------|----------|----------|----------|
| sp P45523 FKBA_ECOLI-TSSTGLVYQVVEAGK           | 1.301955 | 1.9674   | 0.568074 | 0.707811 | 0.515525 | 2.0208   | 1.193929 | 0.77653  | 0.452314 | 2.0742   | 1.380776 | 0.899283 |
| sp P0A7W0 RS4_ECO57-LSDYGVQLR                  | 0.263863 | 1.400422 | 0.226277 | 1.097382 | 0.424034 | 1.223107 | 0.435305 | 0.816864 | 0.585288 | 1.307831 | 0.406739 | 0.872418 |
| sp A7ZTU4 ATPB_ECO24-QLDPLVVGQEHYDTAR          | 0.923311 | 0.7232   | 0.832661 | 2.831945 | 1.54338  | 0.7754   | 0.732079 | 1.186984 | 1.761093 | 0.8438   | 0.763618 | 1.183956 |
| sp P0A6Y9 DNAK_ECOL6-TFEVLATNGDTHLGGEDFDSR     | 1.227119 | 0.9809   | 0.603203 | 0.822615 | 1.058217 | 0.9809   | 0.610809 | 0.822615 | 1.001463 | 0.60495  | 1.07563  | 0.569884 |
| sp B7MRB2 RL7_ECO81-DLVESAPAALK                | 1.584992 | 1.1993   | 1.613877 | 0.827251 | 1.957363 | 1.1993   | 1.026142 | 1.386314 | 1.198174 | 1.29225  | 1.053391 | 1.555876 |
| sp P0AFD2 NUOE_ECOL6-MHENQQPQTEAFELSAER        | 0.245205 | 1.2915   | 0.88081  | 4.965613 | 0.418792 | 1.18785  | 0.937336 | 1.383161 | 0.288238 | 1.2915   | 1.146862 | 1.113699 |
| sp B7M1N3 RL4_ECO8A-DATGIDPVSLIAFDK            | 1.429418 | 1.17985  | 1.112731 | 0.125821 | 1.486431 | 0.94365  | 1.54077  | 0.121081 | 1.533751 | 0.9066   | 1.54077  | 0.10371  |
| sp A7ZSJ4 RL6_ECO24-HADNLTFTGPR                | 0.459536 | 0.646175 | 1.938891 | 0.525913 | 0.62457  | 0.569307 | 1.609826 | 0.473442 | 0.62457  | 0.54205  | 1.597552 | 0.474084 |
| sp P33599 NUOCD_ECOLI-ATGIDFDVR                | 2.822516 | 1.341641 | 0.911966 | 0.96524  | 1.245749 | 0.9115   | 0.841648 | 0.858548 | 0.529573 | 1.34425  | 0.994126 | 0.923958 |
| sp P21513 RNE_ECOLI-MLINATQQEELR               | 1.659695 | 1.8187   | 0.418962 | 0.746949 | 1.327818 | 1.4579   | 0.476917 | 0.628947 | 3.084859 | 1.0971   | 0.390298 | 0.628947 |
| sp A7ZV12 CH60_ECO24-SFGAPTITK                 | 0.983588 | 0.94875  | 0.667319 | 0.724552 | 0.942353 | 0.9286   | 1.182062 | 0.647997 | 0.908812 | 1.1508   | 0.843467 | 0.635471 |
| sp B1XB97 HSLU_ECODH-ILDVLIPPAK                | 0.794403 | 0.78945  | 0.977173 | 0.174802 | 0.743139 | 0.8348   | 0.910021 | 0.18813  | 0.834585 | 0.8333   | 1.070817 | 0.17284  |
| sp B7MYP6 RL19_ECO81-VFQTHSPVVDISVK            | 0.823753 | 1.7931   | 1.41718  | 1.261865 | 0.830077 | 1.37435  | 1.371539 | 0.672844 | 0.913327 | 1.97855  | 1.435574 | 0.892303 |
| sp A7ZV12 CH60_ECO24-GVNVLADAVK                | 1.043178 | 0.75725  | 1.922536 | 1.296939 | 1.107424 | 0.654    | 1.049496 | 1.408043 | 1.40065  | 0.63955  | 0.860292 | 1.142774 |
| sp P0A910 OMPA_ECOLI-<br>FGQGEAAPVVAPAPAPEVQTK | 0.509197 | 0.7355   | 1.229337 | 1.229135 | 0.731638 | 0.8412   | 1.008556 | 0.869026 | 0.693428 | 0.8098   | 1.173852 | 0.734728 |
| sp B7UPE0 RL10_ECO27-LATLPTYEEAIAR             | 4.23341  | 0.1321   | 0.131196 | 2.457798 | 4.23341  | 0.1321   | 0.131196 | 2.457798 | 1.161615 | 1.00845  | 0.56703  | 1.349576 |
| sp P0AFG5 ODO1_ECO57-ATFNSEEK                  | 1.086569 | 0.3738   | 0.896367 | 1.064294 | 1.27045  | 0.7221   | 1.346033 | 1.076342 | 1.270368 | 0.7221   | 1.057012 | 1.113301 |
| sp P62593 BLAT_ECOLX-LLTGELLTLASR              | 0.610759 | 0.1537   | 0.42099  | 0.501415 | 0.610759 | 0.2138   | 0.421073 | 0.554432 | 1.140371 | 0.2739   | 0.730495 | 0.317607 |

|                                       |          |          |          |          |          |          |          |          |          |          |          |          |
|---------------------------------------|----------|----------|----------|----------|----------|----------|----------|----------|----------|----------|----------|----------|
| sp P0A807 RRF_ECO57-SQDDVQK           | 3.227046 | 1.099785 | 2.280428 | 0.115117 | 3.851843 | 1.2991   | 1.373488 | 0.312468 | 3.740292 | 1.2991   | 1.439777 | 1.106834 |
| sp P08200 IDH_ECOLI-FTEGAFK           | 1.567329 | 4.1844   | 2.42999  | 0.239804 | 1.567329 | 1.8386   | 0.367107 | 0.729086 | 1.340573 | 0.9714   | 0.633993 | 0.239804 |
| sp P0A9P2 DLDH_ECO57-FNLMLETK         | 1.503441 | 1.84695  | 1.373441 | 0.402152 | 0.7951   | 0.71255  | 2.025544 | 0.307634 | 0.782717 | 0.76225  | 1.735068 | 0.275305 |
| sp P0ABK0 CYDA_ECOL6-SGSTDQAVR        | 2.120734 | 1.0725   | 0.979915 | 1.001967 | 0.63194  | 1.0725   | 2.344711 | 1.304909 | 0.608263 | 0.9121   | 2.165118 | 0.685242 |
| sp P0A9P2 DLDH_ECO57-VINQLTGGLAGMAK   | 2.770363 | 1.502369 | 0.837761 | 1.178511 | 3.798086 | 1.290867 | 0.166144 | 0.820254 | 0.321743 | 1.094798 | 1.656989 | 0.748264 |
| sp A8A4Y7 ASSY_ECOHS-AYSTDSNMLGATHEAK | 1.044828 | 1.50895  | 1.610236 | 0.903933 | 0.770918 | 1.0786   | 1.414081 | 0.964759 | 0.751638 | 1.45285  | 1.534766 | 0.810551 |
| sp A8A4Y4 IF2_ECOHS-GMASGAVIESFLDK    | 0.137359 | 0.6233   | 3.273743 | 0.037103 | 0.539354 | 0.9316   | 1.222626 | 0.769821 | 0.560941 | 0.6667   | 0.569056 | 0.254181 |
| sp P0A807 RRF_ECO57-VPLPPLTEER        | 1.778358 | 1.63735  | 1.079785 | 1.372707 | 1.209981 | 1.3211   | 0.711739 | 0.833333 | 1.846272 | 1.1593   | 0.733628 | 0.653896 |
| sp B1LNK7 GLYA_ECOSM-ANITVNK          | 1.566183 | 0.6532   | 0.526702 | 0.77368  | 0.813181 | 0.856    | 0.964194 | 0.827874 | 0.827686 | 0.8217   | 1.32032  | 0.800239 |
| sp P08200 IDH_ECOLI-DWGYQLAR          | 1.446081 | 1.036324 | 0.157348 | 1.222336 | 3.314534 | 1.51925  | 0.385422 | 1.432682 | 3.10409  | 1.207    | 0.493081 | 2.238511 |
| sp P0A9A7 FTSZ_ECOL6-MFEPMELTNDVIK    | 1.447412 | 3.87995  | 2.251777 | 0.880553 | 1.350285 | 4.6766   | 1.390004 | 1.2184   | 2.022186 | 4.5096   | 1.780117 | 0.817489 |
| sp A1AF92 GCSP_ECOK1-LQDAFPVLYTGR     | 0.743263 | 0.5415   | 1.176076 | 0.428046 | 0.795785 | 0.7652   | 1.174866 | 0.583382 | 0.899923 | 0.95035  | 1.057478 | 0.466709 |
| sp B7LA23 GLPK_ECO55-SSEVYGQTNIGGK    | 0.842354 | 0.47365  | 1.02632  | 0.726899 | 0.816469 | 0.6022   | 1.036033 | 0.493258 | 0.913406 | 0.8297   | 1.251371 | 0.493258 |
| sp P0AB72 ALF_ECO57-ANEAYLQGQLGNPK    | 1.147773 | 0.7882   | 0.649816 | 0.402603 | 1.192743 | 0.8787   | 0.962678 | 0.473202 | 1.053379 | 0.9547   | 1.278158 | 0.337412 |
| sp P0AD50 YFIA_ECOL6-QMEITPAIR        | 0.246403 | 0.3084   | 1.536113 | 0.711767 | 0.27349  | 3.575    | 1.612188 | 0.57917  | 1.705934 | 0.3084   | 1.612188 | 1.781983 |
| sp P0AG68 RS1_ECOL6-AISLSVR           | 1.81479  | 0.800901 | 1.082343 | 0.123678 | 2.48081  | 0.3283   | 1.533649 | 0.1069   | 1.967525 | 0.3957   | 2.735273 | 0.090991 |
| sp A1AIG0 RPOC_ECOK1-YIVNEVQDVYR      | 3.235499 | 0.2887   | 0.297773 | 1.481821 | 3.931423 | 1.4849   | 0.201451 | 1.765817 | 3.610324 | 1.4849   | 0.175919 | 1.765817 |
| sp P33602 NUOG_ECOLI-IPELAGIK         | 1.584982 | 0.1564   | 1.001042 | 2.363549 | 0.942047 | 0.5426   | 0.589574 | 2.755284 | 0.394298 | 0.4375   | 0.420817 | 3.627744 |
| sp P0AG68 RS1_ECOL6-VSLGLK            | 0.550166 | 0.605915 | 0.227801 | 1.303925 | 0.533117 | 0.705922 | 0.61985  | 2.663993 | 0.906681 | 0.9456   | 0.644543 | 2.376873 |



|                                    |          |          |          |          |          |          |          |          |          |         |          |          |
|------------------------------------|----------|----------|----------|----------|----------|----------|----------|----------|----------|---------|----------|----------|
| sp A7ZJA8 SUCC_ECO24-VAEETPHLIHK   | 0.469484 | 0.998169 | 0.494108 | 2.033565 | 1.085132 | 1.2996   | 0.304146 | 2.814726 | 0.416159 | 0.70225 | 0.299361 | 3.052951 |
| sp A7ZJ31 SYL_ECO24-APTGDGEQDR     | 0.95581  | 0.59438  | 1.101473 | 6.460896 | 4.653426 | 0.852789 | 1.101473 | 4.150004 | 5.356831 | 1.5956  | 0.734958 | 6.587691 |
| sp A7ZSJ4 RL6_ECO24-DGYADGWAQAGTAR | 0.904575 | 1.2821   | 0.884484 | 0.747723 | 1.171163 | 1.2821   | 2.335826 | 1.160136 | 1.185686 | 1.2821  | 2.587126 | 0.855999 |
| sp P0AFH7 OPPC_ECO57-VAIGGR        | 0.320212 | 3.98455  | 0.217692 | 0.365207 | 2.019728 | 0.4164   | 0.688735 | 0.392891 | 0.89162  | 0.4164  | 1.134803 | 0.636911 |
| sp B7MGS0 DPS_ECO45-NDVSDSEK       | 3.14217  | 5.078938 | 1.373675 | 0.403701 | 5.735711 | 9.3636   | 1.75214  | 0.276657 | 5.770619 | 9.3636  | 1.942711 | 0.369103 |
| sp P13035 GLPD_ECOLI-APLLSVFGGK    | 1.277169 | 0.39715  | 1.967149 | 0.28595  | 1.402663 | 0.4325   | 2.323388 | 1.374425 | 0.438437 | 0.4797  | 2.884046 | 6.375668 |
| sp P0AEY0 MALE_ECO57-IAATMENAQK    | 0.881818 | 1.6371   | 0.574113 | 0.545153 | 0.994784 | 1.6371   | 1.08272  | 1.071781 | 1.060404 | 1.0889  | 1.238093 | 1.487824 |
| sp B1IT06 RS6_ECOLC-QLAYPINK       | 1.861097 | 1.2616   | 1.27115  | 0.317058 | 1.897405 | 1.2616   | 1.182269 | 0.35262  | 1.897405 | 1.2616  | 1.516678 | 0.231961 |
| sp P08200 IDH_ECOLI-HPELTDVIFR     | 0.894862 | 1.1487   | 0.856797 | 0.600538 | 1.034759 | 1.0732   | 1.42474  | 0.462922 | 1.13468  | 1.1487  | 1.175499 | 0.418053 |
| sp B1LNK7 GLYA_ECOSM-YPVYA         | 4.377968 | 1.239335 | 0.921677 | 1.832684 | 4.377968 | 0.955531 | 1.546206 | 1.919272 | 3.116679 | 0.7382  | 2.292503 | 1.972493 |
| sp P0AC39 ASPA_ECOL6-IEEDLLGTR     | 0.652302 | 1.7399   | 0.206228 | 1.185063 | 0.614007 | 1.4031   | 0.189297 | 1.496794 | 1.349155 | 1.7399  | 0.292009 | 1.598321 |
| sp P0A9B3 G3P_ECOL6-LTGMAFR        | 1.715842 | 1.0825   | 2.124966 | 1.346742 | 2.884819 | 0.3187   | 1.444102 | 1.275501 | 1.832432 | 0.3187  | 1.331249 | 1.275501 |
| sp B1IQH7 YAEH_ECOLC-SLGITNPEEIDR  | 0.667656 | 1.312855 | 0.607843 | 1.796798 | 1.384704 | 1.2648   | 1.032659 | 0.97517  | 1.411463 | 1.2648  | 1.130592 | 1.221921 |
| sp B7M1N4 RL3_ECO8A-VTVQSLDVVR     | 2.175889 | 1.606009 | 2.177479 | 0.094803 | 2.652937 | 1.855    | 2.398859 | 0.082432 | 2.856625 | 1.5938  | 3.941508 | 0.08351  |
| sp A7ZJD0 GPMA_ECO24-GFAVTPPELTK   | 0.061349 | 0.35255  | 1.129272 | 1.571749 | 1.146371 | 0.4148   | 1.047313 | 0.623238 | 1.240239 | 0.7492  | 1.583156 | 0.687026 |
| sp P0ACG0 HNS_ECO57-YSYVDENGETK    | 1.193844 | 0.9587   | 0.470683 | 1.388056 | 1.319899 | 0.9531   | 0.443301 | 1.05494  | 1.71634  | 1.0119  | 0.614225 | 0.684119 |
| sp A7ZS83 RL21_ECO24-AEVVAHGR      | 0.96824  | 0.610274 | 0.920543 | 2.157855 | 0.812388 | 0.5116   | 0.775713 | 0.927836 | 0.546138 | 0.5116  | 0.775713 | 0.927836 |
| sp P0ACA3 SSPA_ECOLI-ELTLWESR      | 3.844157 | 1.286    | 0.240684 | 0.191436 | 6.217255 | 1.286    | 0.769293 | 0.227432 | 6.217255 | 1.54805 | 0.124048 | 0.091113 |
| sp P0AFG5 ODO1_ECO57-QQQDLVNDALNVE | 0.655152 | 0.8154   | 0.032585 | 4.956317 | 1.096557 | 1.2053   | 0.532826 | 3.793174 | 1.096557 | 1.2053  | 0.642498 | 1.458705 |

|                                        |          |          |          |          |          |          |          |          |          |          |          |          |
|----------------------------------------|----------|----------|----------|----------|----------|----------|----------|----------|----------|----------|----------|----------|
| sp A7ZV12 CH60_ECO24-AAVEEGVVAGGGVALIR | 0.998393 | 1.03455  | 1.85342  | 0.766755 | 0.757299 | 0.8794   | 0.75907  | 0.587425 | 0.981832 | 0.8794   | 0.766576 | 0.69654  |
| sp B7N9S6 SYQ_ECOLU-GLAYVDELTPEQIR     | 0.598572 | 0.4894   | 1.552623 | 1.294501 | 0.65608  | 0.4699   | 1.552623 | 1.294501 | 0.643802 | 0.4699   | 1.552623 | 1.294501 |
| sp K0BE10 TAL_ECO1E-EHGYETVVMGASFR     | 0.212045 | 1.7315   | 0.735934 | 2.717461 | 0.688719 | 1.4346   | 0.684861 | 2.436359 | 0.711591 | 1.0642   | 0.77316  | 2.634269 |
| sp P38489 NFSB_ECOLI-SAAGNYVFNER       | 0.436337 | 0.60025  | 1.087987 | 1.573263 | 0.637216 | 0.60025  | 0.886589 | 0.97727  | 0.724264 | 0.60025  | 4.721006 | 1.16529  |
| sp P0AB82 ILVE_ECO57-WGWLDQVNO         | 1.329655 | 0.957556 | 1.444875 | 0.756979 | 0.869448 | 1.003258 | 1.026774 | 0.661794 | 1.62803  | 0.991428 | 1.107388 | 0.633494 |
| sp P0A9A7 FTSZ_ECOL6-RPEITLVTK         | 0.796716 | 0.750276 | 9.503839 | 6.895454 | 1.249087 | 0.635727 | 2.961224 | 1.335961 | 0.694691 | 0.172    | 2.369022 | 4.743619 |
| sp B7LA23 GLPK_ECO55-DGLEDYIR          | 0.644892 | 1.67865  | 1.155334 | 0.612265 | 0.597569 | 0.9812   | 0.837268 | 0.565297 | 0.933834 | 1.07735  | 1.062772 | 0.526092 |
| sp P0AG61 RS14_ECO57-GEIPGLK           | 1.168831 | 0.2319   | 0.836005 | 0.911977 | 1.381914 | 0.8481   | 0.968762 | 0.745751 | 0.414216 | 0.54145  | 1.105609 | 0.669767 |
| sp P37902 GLTI_ECOLI-QAAFSDTIFVVGTR    | 0.554098 | 0.6362   | 0.910362 | 11.97821 | 0.403467 | 0.8074   | 0.985223 | 0.946645 | 0.670598 | 0.7537   | 1.222483 | 0.809061 |
| sp P0AC41 SDHA_ECOLI-LDDGR             | 0.377132 | 1.897    | 1.396165 | 3.979546 | 0.313396 | 1.897    | 1.291178 | 19.51666 | 0.167323 | 1.897    | 1.291178 | 3.321749 |
| sp P00509 AAT_ECOLI-NFGLYNER           | 0.853042 | 1.1164   | 0.513972 | 1.993799 | 0.487629 | 1.1164   | 0.634547 | 1.786729 | 0.553947 | 0.9625   | 0.910068 | 1.327458 |
| sp A7ZUD3 TPIS_ECO24-DIGAQYIIHGHSER    | 1.760846 | 0.598255 | 0.968589 | 2.142109 | 1.760846 | 0.658865 | 0.98936  | 1.75815  | 1.294023 | 0.65955  | 0.904822 | 0.821276 |
| sp B7L4J7 RL5_ECO55-GNYSMGVR           | 0.709844 | 1.636454 | 1.596461 | 0.584196 | 1.558328 | 0.683006 | 1.479492 | 0.584196 | 1.662902 | 0.762285 | 1.479492 | 0.584196 |
| sp B1XB97 HSLU_ECODH-LLIEEEAAK         | 0.981934 | 0.5528   | 0.065318 | 0.995155 | 1.252668 | 1.5791   | 0.134586 | 0.845603 | 0.979145 | 1.41555  | 0.779347 | 1.319831 |
| sp P63285 CLPB_ECO57-NNPVLIGEPGVGK     | 0.853615 | 0.9752   | 1.335062 | 0.719953 | 0.778364 | 0.8853   | 0.907121 | 0.501347 | 0.697225 | 0.7789   | 1.077411 | 0.468881 |
| sp A7ZUM3 PUR9_ECO24-GVELLSTGGTAR      | 2.630577 | 0.857297 | 1.944194 | 1.157094 | 4.085489 | 0.725285 | 12.82537 | 1.334282 | 4.085489 | 0.3408   | 1.942743 | 0.642795 |
| sp P27302 TKT1_ECOLI-TEEQLANIAR        | 2.394312 | 1.4737   | 0.444173 | 0.683059 | 1.848745 | 1.517    | 0.376293 | 2.131511 | 0.316903 | 1.4737   | 0.557835 | 1.718889 |
| sp P60624 RL24_ECOLI-NVLSSGK           | 3.653531 | 1.9384   | 0.173452 | 1.213612 | 1.204026 | 3.2065   | 0.267637 | 0.528136 | 1.486455 | 1.0199   | 0.679888 | 0.421687 |
| sp A7ZIN4 KAD_ECO24-DDVTGEELTTR        | 1.511158 | 1.3456   | 1.379326 | 0.682601 | 1.294376 | 1.66505  | 1.379326 | 1.286389 | 1.758571 | 1.515    | 0.917209 | 0.991244 |

|                                   |          |          |          |          |          |         |          |          |          |         |          |          |
|-----------------------------------|----------|----------|----------|----------|----------|---------|----------|----------|----------|---------|----------|----------|
| sp P0A6A4 ACKA_ECOL6-LGVLGFEVDHER | 1.091999 | 0.6949   | 1.272495 | 0.232153 | 1.142789 | 0.6949  | 1.029798 | 0.255789 | 1.584326 | 0.6811  | 2.903673 | 0.38664  |
| sp P0ACF1 DBHA_ECOL6-NPQTGK       | 2.260256 | 0.6398   | 1.729743 | 0.582428 | 3.360532 | 0.70665 | 1.127366 | 1.018394 | 2.169399 | 0.7735  | 0.95624  | 1.838352 |
| sp B7L6J2 SYT_ECO55-DAMFTTSENK    | 1.004692 | 0.641793 | 0.705423 | 3.290292 | 8.079624 | 1.1215  | 0.665904 | 1.019165 | 2.035826 | 0.6798  | 1.076619 | 0.74599  |
| sp P0AG68 RS1_ECOL6-VTAVDAK       | 0.177636 | 1.3491   | 1.585116 | 1.247038 | 0.723139 | 1.41635 | 1.198461 | 0.74449  | 1.77464  | 1.41635 | 1.801004 | 0.67962  |

---

**Table S2** The up- and down-regulated boundaries of mdCATs DIA quantification acquired from equally mixed pooled serum.

|    | Up-border  | Low-border |
|----|------------|------------|
| 1  | 1.22817726 | 0.77182274 |
| 2  | 1.26537114 | 0.73462886 |
| 3  | 1.24878224 | 0.75121776 |
| 4  | 1.34395305 | 0.65604695 |
| 5  | 1.32402135 | 0.67597865 |
| 6  | 1.29212899 | 0.70787101 |
| 7  | 1.22965322 | 0.77034678 |
| 8  | 1.21631817 | 0.78368183 |
| 9  | 1.2537667  | 0.74623331 |
| 10 | 1.2272334  | 0.7727666  |
| 11 | 1.32181333 | 0.67818667 |
| 12 | 1.31544869 | 0.68455131 |
| 13 | 1.29434109 | 0.70565891 |
| 14 | 1.29120688 | 0.70879312 |
| 15 | 1.20281265 | 0.79718735 |
| 16 | 1.25541023 | 0.74458977 |
| 17 | 1.21729554 | 0.78270447 |
| 18 | 1.30874683 | 0.69125317 |
| 19 | 1.23546627 | 0.76453373 |
| 20 | 1.27912793 | 0.72087207 |
| 21 | 1.28978196 | 0.71021804 |

**Table S3** Proteins quantified from 21 human serum using mdCATs DIA strategy.

| Protein_ID                | Pep_seq                       | Protein_ID            | Pep_seq                    | Protein_ID            | Pep_seq                              |
|---------------------------|-------------------------------|-----------------------|----------------------------|-----------------------|--------------------------------------|
| sp P01009 A1AT_HUMAN      | ITPNLAEFASFSLYR               | sp P02652 APOA2_HUMAN | AGTELVNFLSYFVELGTQPATQ     | sp P01876 IGHA1_HUMAN | TPLTATLSK                            |
| sp P02774 VTDB_HUMAN      | YTFELSR                       | sp P04114 APOB_HUMAN  | LNDLNSVLVMPTFHVPFTDLQVPSCK | sp P06396 GELS_HUMAN  | EVQGFESATFLGYFK                      |
| sp P02671 FIBA_HUMAN      | GSESGIFTNTK                   | sp P69905 HBA_HUMAN   | VDPVNFK                    | sp P07360 CO8G_HUMAN  | VQEAHLTEDQIFYFPK                     |
| sp P01023 A2MG_HUMAN      | LLIYAVLPTGDVIGDSAK            | sp P01024 CO3_HUMAN   | AYYENSPQQVFSTEFVK          | sp P0C0L5 CO4B_HUMAN  | GHLFLQTDQPIYNPGQR                    |
| sp P03952 KLKB1_HUMAN     | LVGITSWGEGCAR                 | sp P01042 KNG1_HUMAN  | KLQSLDCNAEVYVVPWEK         | sp P01008 ANT3_HUMAN  | RVWELSK                              |
| sp P02774 VTDB_HUMAN      | HQPQEFPTYVEPTNDEICEAFR        | sp P0C0L5 CO4B_HUMAN  | LTSLSDR                    | sp P01877 IGHA2_HUMAN | SAVQGPPER                            |
| sp P01876 IGHA1_HUMAN     | DASGVFTWTPSSGK                | sp P01024 CO3_HUMAN   | LMNIFLK                    | sp P08185 CBG_HUMAN   | GTWTQPFDLASTR                        |
| sp P02652 APOA2_HUMAN     | EPCVESLVSQYFQTVTDYGKDL<br>MEK | sp P00747 PLMN_HUMAN  | FSPATHPSEGLEENYCR          | sp P01859 IGHG2_HUMAN | STSESTAALGCLVK                       |
| sp P02671 FIBA_HUMAN      | ESSSHHPGIAEFPSR               | sp P02768 ALBU_HUMAN  | AEFAEVSK                   | sp P0DOX7 IGK_HUMAN   | VDNALQSGNSQESVTEQDSKST<br>YLSSTLTLSK |
| sp P02655 APOC2_HUMAN     | TAAQNLYEK                     | sp P02649 APOE_HUMAN  | LGADMEDVCGR                | sp P00751 CFAB_HUMAN  | IDEIR                                |
| sp P69905 HBA_HUMAN       | VGAHAGEYGAEALER               | sp Q8NEM8 CBPC3_HUMAN | QLPNQGLAHCK                | sp P04114 APOB_HUMAN  | EYSGTIASEANTYLSK                     |
| sp P04114 APOB_HUMAN      | ALVDTLK                       | sp P19652 A1AG2_HUMAN | YEGGR                      | sp P02647 APOA1_HUMAN | AELQEGAR                             |
| sp A0A0C4DH29 HV103_HUMAN | SEDTAVYYCAR                   | sp P05090 APOD_HUMAN  | VLNQELR                    | sp P00747 PLMN_HUMAN  | LFLEPTR                              |
| sp P02768 ALBU_HUMAN      | QNCELFEQLGEYK                 | sp P01024 CO3_HUMAN   | EYVLPSFEVIVEPTEK           | sp P01023 A2MG_HUMAN  | IAQWQSFQLEGGLK                       |
| sp P02787 TRFE_HUMAN      | YLGEYVK                       | sp P68871 HBB_HUMAN   | FFESFGDLSTPDVAVMGNPK       | sp P04114 APOB_HUMAN  | VHANPLLIDVVTYLVALIPEPSAQ<br>QLR      |
| sp P13671 CO6_HUMAN       | ALNHLPLEYNSALYSR              | sp P01876 IGHA1_HUMAN | QEPSQGTTFFAVTSILR          | sp P04114 APOB_HUMAN  | ATFQTPDFIVPLTDLR                     |
| sp P01009 A1AT_HUMAN      | SVLGQLGITK                    | sp P04114 APOB_HUMAN  | AEPLAFTFSHDYK              | sp P08603 CFAH_HUMAN  | SSNLIIIEHLK                          |
| sp P02649 APOE_HUMAN      | AATVGSAGQPLQER                | sp P02763 A1AG1_HUMAN | WFYIASAFR                  | sp P01871 IGHM_HUMAN  | LICQATGFSPR                          |
| sp P0C0L5 CO4B_HUMAN      | EPFLSCCQFAESLR                | sp P02771 FETA_HUMAN  | LVLVDVAHVHEHCCR            | sp P04114 APOB_HUMAN  | IISDYHQQFR                           |
| sp P01876 IGHA1_HUMAN     | DLCGCYSVSSVLPGCAEPWNHG        | sp P02748 CO9_HUMAN   | LSPIYNLVPVK                | sp P04114 APOB_HUMAN  | FPEVDVLTk                            |

| K                     |                        |                           |                         |                       |                                         |
|-----------------------|------------------------|---------------------------|-------------------------|-----------------------|-----------------------------------------|
| sp P04114 APOB_HUMAN  | MLETVR                 | sp P01871 IGHM_HUMAN      | NVPLPVIAELPPK           | sp P06727 APOA4_HUMAN | ISASAEELR                               |
| sp P02647 APOA1_HUMAN | VEPLR                  | sp P04004 VTNC_HUMAN      | FEDGVLDPDYPR            | sp P01024 CO3_HUMAN   | QPSSAFAAFVK                             |
| sp P08603 CFAH_HUMAN  | KGEWVALNPLR            | sp P01782 HV309_HUMAN     | FTISR                   | sp P02768 ALBU_HUMAN  | QNCSELFELGGEYKFNALLVR                   |
| sp P27169 PON1_HUMAN  | YVYIAELLAHK            | sp P01859 IGHG2_HUMAN     | EPQVYTLPPSR             | sp P02768 ALBU_HUMAN  | VHTECCHGDLLECADDRADLAK                  |
| sp O75636 FCN3_HUMAN  | LLGEVDHYQLALGK         | sp P01031 CO5_HUMAN       | EYVLPFHVSIEPEYNFIGYK    | sp P01009 A1AT_HUMAN  | SASLHLPK                                |
| sp P04003 C4BPA_HUMAN | LMQCLPNPEDVK           | sp P01024 CO3_HUMAN       | DYAGVFS DAGLFTSSSGQQTQR | sp P04114 APOB_HUMAN  | LLSGGNTLHLVSTTK                         |
| sp P01024 CO3_HUMAN   | SNLDEDIAEENIVSR        | sp P00747 PLMN_HUMAN      | EQQCIVMAENR             | sp P02671 FIBA_HUMAN  | EVVTSEDGSDCPEAMDGLTSLGIG<br>TLDGFR      |
| sp P02775 CXCL7_HUMAN | NIQSLEVIGK             | sp P0C0L5 CO4B_HUMAN      | MRPSTDTITVMVENSHGLR     | sp P01861 IGHG4_HUMAN | EPQVYTLPPSQEEMTK                        |
| sp P0C0L4 CO4A_HUMAN  | TLEIPGNSDPNMIPDGFNSYVR | sp P01031 CO5_HUMAN       | DVFLEMNIPYSVVR          | sp P05546 HEP2_HUMAN  | NYNLVESLK                               |
| sp P02774 VTDB_HUMAN  | EVVSLTEACCAEGADPDCYDTR | sp P04114 APOB_HUMAN      | EIFNMAR                 | sp P01871 IGHM_HUMAN  | FTCTVTHTDLPSPLK                         |
| sp Q9H1C0 LPAR5_HUMAN | LVAASVPAR              | sp P02655 APOC2_HUMAN     | TYLPAVDEK               | sp P04114 APOB_HUMAN  | VSALLTPAEGTGTWK                         |
| sp P08603 CFAH_HUMAN  | EGWIHTVCINGR           | sp P02652 APOA2_HUMAN     | KAGTELVNFLSYFVELGTQPATQ | sp O43866 CD5L_HUMAN  | CSGEEQSLEQCQHR                          |
| sp P02768 ALBU_HUMAN  | CCAAADPHECYAK          | sp P04003 C4BPA_HUMAN     | GYILVGQAK               | sp Q14624 ITIH4_HUMAN | DQFNLIVFSTEATQWRPSLVPASA<br>ENVNK       |
| sp P00747 PLMN_HUMAN  | EAQLPVIENK             | sp P07358 CO8B_HUMAN      | SVFLHAR                 | sp P0C0L4 CO4A_HUMAN  | GLEEELQFSLGSK                           |
| sp P08603 CFAH_HUMAN  | SCDIPVFMNAR            | sp P0DOX2 IGA2_HUMAN      | VAAEDWK                 | sp P0DOX2 IGA2_HUMAN  | DLCGCYSVSSVLPGCAQPWNHGE<br>TFTCTAAHPELK |
| sp P01024 CO3_HUMAN   | TFISPIK                | sp P01859 IGHG2_HUMAN     | GFYPSDISVEWESNGQPENNYK  | sp P01024 CO3_HUMAN   | IHWESASLLR                              |
| sp P01024 CO3_HUMAN   | VTIKPAPETEK            | sp P01024 CO3_HUMAN       | RIPIEDGSGEVLSR          | sp P02751 FINC_HUMAN  | EESPLLIGQQSTVSDVPR                      |
| sp P02656 APOC3_HUMAN | DYWSTVK                | sp A0A0A0MS15 HV349_HUMAN | GLEWVGFIR               | sp P02787 TRFE_HUMAN  | MYLGYEYVTAIR                            |
| sp P02787 TRFE_HUMAN  | EGYYGYTGAFR            | sp P00751 CFAB_HUMAN      | DAQYAPGYDK              | sp P06727 APOA4_HUMAN | LNHQLEGLTFQMK                           |
| sp P01772 HV333_HUMAN | FTISR                  | sp P01042 KNG1_HUMAN      | YFIDFVAR                | sp P00751 CFAB_HUMAN  | QLNEINYEDHK                             |
| sp P02647 APOA1_HUMAN | DYVSQFEGSALGK          | sp P0C0L5 CO4B_HUMAN      | LELSVDGAK               | sp P0DJ18 SAA1_HUMAN  | EANYIGSDK                               |
| sp P01042 KNG1_HUMAN  | EGDCPVQSGK             | sp P01024 CO3_HUMAN       | VSHSEDDCLAFK            | sp Q08380 LG3BP_HUMAN | ELSEALGQIFDSQR                          |

|                       |                                |                           |                           |                       |                       |
|-----------------------|--------------------------------|---------------------------|---------------------------|-----------------------|-----------------------|
|                       |                                |                           |                           | N                     |                       |
| sp P0C0L4 CO4A_HUMAN  | LLLFSPSVVHLGVPLSVGVQLQ<br>DVPR | sp P00734 THRB_HUMAN      | ETAASLLQAGYK              | sp P00738 HPT_HUMAN   | LPECEAVCGKPK          |
| sp P01024 CO3_HUMAN   | TIYTPGSTVLYR                   | sp A0A0B4J1Y9 HV372_HUMAN | GLEWVGR                   | sp P01031 CO5_HUMAN   | DGHVILQLNSIPSSDFLCVR  |
| sp P02649 APOE_HUMAN  | LASHLR                         | sp Q86V48 LUZP1_HUMAN     | IMGGSGTETTLEK             | sp P19827 ITIHI_HUMAN | QAVDTAVDGVFIR         |
| sp P0C0L5 CO4B_HUMAN  | ASAGLLGAHAAAITAYALTLTK         | sp P00747 PLMN_HUMAN      | VVGGCVAHPHSWPWQVSLR       | sp P04003 C4BPA_HUMAN | LNNGEITQHR            |
| sp P00734 THRB_HUMAN  | SEGSSVNLSPPLEQCVPDR            | sp P02790 HEMO_HUMAN      | LYLVQGTQVYVFLTK           | sp P02749 APOH_HUMAN  | VSFFCK                |
| sp P02751 FINC_HUMAN  | RPGGEPSPGTTGQSYNQYSQR          | sp P0DOY2 IGLC2_HUMAN     | AAPSVTLFPPSSEELQANK       | sp P02768 ALBU_HUMAN  | RHPYFYAPELFFAKR       |
| sp P02749 APOH_HUMAN  | EHSSLAFWK                      | sp P01031 CO5_HUMAN       | GLLVGEILSAVLSQEGINILTHLPK | sp P0C0L5 CO4B_HUMAN  | GSFEFVPGDAVSK         |
| sp P01009 A1AT_HUMAN  | LSITGTYDLK                     | sp P27169 PON1_HUMAN      | IFFYDSENPPASEVLR          | sp P04114 APOB_HUMAN  | GMALFGEGK             |
| sp P00751 CFAB_HUMAN  | YGLVTYATYPK                    | sp P0C0L5 CO4B_HUMAN      | DFALLSLQVPLKDAK           | sp P10643 CO7_HUMAN   | GCPTEEGCGER           |
| sp P0C0L5 CO4B_HUMAN  | GPEVQLVAHSPWLK                 | sp P01023 A2MG_HUMAN      | EQAPHICANGR               | sp P02768 ALBU_HUMAN  | TCVADESAENC DK        |
| sp P02771 FETA_HUMAN  | QKPQITEEQLEAVIADFSGLLEK        | sp P01602 KV105_HUMAN     | VTITCR                    | sp P02774 VTDB_HUMAN  | THLPEVFLSK            |
| sp P00738 HPT_HUMAN   | VMPICLPSK                      | sp P00734 THRB_HUMAN      | IVEGSDAEIGMSPWQVMLFR      | sp P0DOX5 IGG1_HUMAN  | STSGGTAALGCLVK        |
| sp P02768 ALBU_HUMAN  | DLGEENFK                       | sp P04217 A1BG_HUMAN      | VTLTCVAPLSGVDFQLR         | sp P01023 A2MG_HUMAN  | QGIPFFGQVR            |
| sp P02787 TRFE_HUMAN  | DSAHGFLK                       | sp P01024 CO3_HUMAN       | DQLTCNK                   | sp P00450 CERU_HUMAN  | NNEGTYYSPNYPQSR       |
| sp P0DOX5 IGG1_HUMAN  | DELTK                          | sp P0DOX6 IGM_HUMAN       | LICQATGFSPR               | sp P04114 APOB_HUMAN  | AVSMPSFSILGSDVR       |
| sp P68871 HBB_HUMAN   | GTFATLSELHCDK                  | sp P01024 CO3_HUMAN       | VFLDCCNYITELR             | sp P01009 A1AT_HUMAN  | LGMFNIQHCK            |
| sp P0C0L5 CO4B_HUMAN  | VDVQAGACEGK                    | sp P01031 CO5_HUMAN       | ESYSGVTLDPR               | sp P19652 A1AG2_HUMAN | DKCEPLEK              |
| sp P01700 LV147_HUMAN | RPSGVPDR                       | sp P68871 HBB_HUMAN       | VNVDEVGGEALGR             | sp P01024 CO3_HUMAN   | WLILEK                |
| sp P01019 ANGT_HUMAN  | QPFVQGLALYTPVVLPR              | sp P04114 APOB_HUMAN      | VPSYTLILPSLELPVLHVPR      | sp P00738 HPT_HUMAN   | DIAPTLTYVGK           |
| sp P00734 THRB_HUMAN  | AIEGR                          | sp P19652 A1AG2_HUMAN     | TLMFGSYLDDEK              | sp P04114 APOB_HUMAN  | LSLESLSYFSIESSTK      |
| sp P02768 ALBU_HUMAN  | HPDYSVVLLLR                    | sp P0C0L5 CO4B_HUMAN      | LNMGITDLQGLR              | sp P01023 A2MG_HUMAN  | VDSHFR                |
| sp P01011 AACT_HUMAN  | GTHVDLGLASANVDFAFSLYK          | sp P0DOX6 IGM_HUMAN       | DGFFGNPR                  | sp P0DOX5 IGG1_HUMAN  | CPAPPELLGGPSVFLFPPKPK |
| sp P01031 CO5_HUMAN   | IDTQDIEASHYR                   | sp P02671 FIBA_HUMAN      | DSHSLTTNIMEILR            | sp P01876 IGHA1_HUMAN | GDTFSCMVGHEALPLAFTQK  |

|                           |                         |                           |                           |                           |                          |
|---------------------------|-------------------------|---------------------------|---------------------------|---------------------------|--------------------------|
| sp P02766 TTHY_HUMAN      | GSPAINVAVHVFR           | sp A0M8Q6 IGLC7_HUMAN     | AAPSVTLFPPSSEELQANK       | sp P06727 APOA4_HUMAN     | IDQTVEELR                |
| sp P02787 TRFE_HUMAN      | SVIPSDGSPVACVK          | sp P36955 PEDF_HUMAN      | EIPDEISILLGLVAHFK         | sp P00738 HPT_HUMAN       | TEGDGVVYTLNDK            |
| sp P0DOX6 IGM_HUMAN       | ESGPTTYK                | sp P25311 ZA2G_HUMAN      | EIPAWVPFDPAQAQITK         | sp P04114 APOB_HUMAN      | FIIPGLK                  |
| sp P00450 CERU_HUMAN      | SVPPSASHVAPTETFTYEWTVPK | sp P04114 APOB_HUMAN      | VPLLLSEPINIIDALEMR        | sp P01019 ANGT_HUMAN      | AAMVGMFLANFLGFR          |
| sp P01024 CO3_HUMAN       | VVLVAVDK                | sp P01876 IGHA1_HUMAN     | KGDTFSCMVGHEALPLAFTQK     | sp P05543 THBG_HUMAN      | AVLHIGEK                 |
| sp P04114 APOB_HUMAN      | LVTELR                  | sp P0DOX5 IGG1_HUMAN      | GFYPSDIAVEWESNGQPENNYK    | sp P01023 A2MG_HUMAN      | DNGCFR                   |
| sp P0DOX6 IGM_HUMAN       | GVALHRPDVYLLPPAR        | sp P04003 C4BPA_HUMAN     | GVGWSHPLPQCEIVK           | sp P02741 CRP_HUMAN       | ESDTSYVSLK               |
| sp P02771 FETA_HUMAN      | GYQELLEK                | sp P04114 APOB_HUMAN      | AHLNIK                    | sp P01011 AACT_HUMAN      | DSLEFR                   |
| sp P02768 ALBU_HUMAN      | EFNAETFTFHADICTLSEK     | sp P04114 APOB_HUMAN      | AHLDIAGSLEGHLR            | sp P02790 HEMO_HUMAN      | NFPSPVDAAFR              |
| sp P19823 ITIH2_HUMAN     | TILDDL                  | sp P02671 FIBA_HUMAN      | GGSTSYGTGSETESPR          | sp A0A0C4DH72 KV106_HUMAN | LIYAASSLQSGVPSR          |
| sp P04114 APOB_HUMAN      | GIISALLVPPETEEAK        | sp P02768 ALBU_HUMAN      | AWAVAR                    | sp P02766 TTHY_HUMAN      | TSESGELHGLTTEEEFVEGIYK   |
| sp P01619 KV320_HUMAN     | ATGIPDR                 | sp P01023 A2MG_HUMAN      | ETTFNSLLCPSGGEVSEELSLK    | sp P02768 ALBU_HUMAN      | DLGEENFKALVLIIFAQYLQQCPF |
| sp P04217 A1BG_HUMAN      | NGVAQEPVHLDSPAIAK       | sp P35542 SAA4_HUMAN      | AYWDIMISNHQNSNR           | sp P01024 CO3_HUMAN       | DSCVGSLLVVK              |
| sp P08603 CFAH_HUMAN      | EQVQSCGPPPELLNGNVK      | sp P00738 HPT_HUMAN       | VSVNER                    | sp P02751 FINC_HUMAN      | VPGTSTSATLTGLTR          |
| sp P01024 CO3_HUMAN       | IPIEDGSGEVVLSR          | sp P01860 IGHG3_HUMAN     | SCDTPPPCPR                | sp P15169 CBPN_HUMAN      | EALIQFLEQVHQGIK          |
| sp P01023 A2MG_HUMAN      | LVHVEEPHTETVR           | sp P02768 ALBU_HUMAN      | HPYFYAPELLFFAK            | sp P08603 CFAH_HUMAN      | TDCLSLPSFENAIIPMGEK      |
| sp P01042 KNG1_HUMAN      | IASFSQNCDIYPGK          | sp A0A0J9YX35 HV64D_HUMAN | FTISR                     | sp P02748 CO9_HUMAN       | VVEESELAR                |
| sp A0A0A0MS15 HV349_HUMAN | FTISR                   | sp P0C0L4 CO4A_HUMAN      | LLATLCSAEVCQCAEGK         | sp P02649 APOE_HUMAN      | SWFEPLVEDMQR             |
| sp P02768 ALBU_HUMAN      | AVMDDFAAFVEK            | sp P0C0L4 CO4A_HUMAN      | SMQGGLVGNDETVALTAFVTIALHH | sp P68871 HBB_HUMAN       | VVAGVANALAHK             |
| sp P02647 APOA1_HUMAN     | EQLGPVTQEFWDNLEKETEGLR  | sp P00738 HPT_HUMAN       | FTDHLK                    | sp P05543 THBG_HUMAN      | GWVDLFPVK                |
| sp P01023 A2MG_HUMAN      | TEVSSNHVLIYLDK          | sp P01023 A2MG_HUMAN      | QTVSWAVTPK                | sp P06310 KV230_HUMAN     | DSGVPDR                  |
| sp P01834 IGKC_HUMAN      | TVAAPSVFIFPPSDEQLK      | sp P0DOX5 IGG1_HUMAN      | GPSVFPLAPSSK              | sp P01024 CO3_HUMAN       | LVLSEK                   |
| sp P02748 CO9_HUMAN       | RPWNVASLIYETK           | sp P10643 CO7_HUMAN       | EQTMSECEAGALR             | sp P02751 FINC_HUMAN      | LGVRPSQGGEAPR            |



|                       |                         |                       |                           |                           |                       |
|-----------------------|-------------------------|-----------------------|---------------------------|---------------------------|-----------------------|
| sp P02766 TTHY_HUMAN  | RYTIAALLSPYSYSTTAVVTNPK | sp P01008 ANT3_HUMAN  | EQLQDMGLVDFLSPEK          | sp P0C0L5 CO4B_HUMAN      | SHALQLNNR             |
| sp P0DOX7 IGK_HUMAN   | VDNALQSGNSQESVTEQDSK    | sp P68871 HBB_HUMAN   | LLVVYPWTQR                | sp P05155 IC1_HUMAN       | TLYSSSPR              |
| sp P02775 CXCL7_HUMAN | LAGDESAD                | sp P01024 CO3_HUMAN   | VVLVSLQSGYLFIQTDK         | sp P00751 CFAB_HUMAN      | LEDSVTYHCSR           |
| sp P01599 KV117_HUMAN | VTITCR                  | sp P02751 FINC_HUMAN  | DLEVVAATPTSLISWDAPAVTVR   | sp P0C0L4 CO4A_HUMAN      | VETVDR                |
| sp P04114 APOB_HUMAN  | ILGEELGFASLHDLQLLGK     | sp P02787 TRFE_HUMAN  | DLLFRDDTVCLAK             | sp P02768 ALBU_HUMAN      | KYLYEIAR              |
| sp P0C0L4 CO4A_HUMAN  | LNMGITDLQGLR            | sp P01860 IGHG3_HUMAN | ALPAPIEK                  | sp P02751 FINC_HUMAN      | EINLAPDSSSVVVSGLMVATK |
| sp P00739 HPTR_HUMAN  | TEGDGVYTLNDK            | sp P00450 CERU_HUMAN  | TTIEKPVWLGFLGPIIK         | sp P0C0L4 CO4A_HUMAN      | EELVYELNPLDHR         |
| sp P00738 HPT_HUMAN   | TEGDGVYTLNNEK           | sp P01031 CO5_HUMAN   | DINYVNPVIK                | sp P02042 HBD_HUMAN       | LLVVYPWTQR            |
| sp P10909 CLUS_HUMAN  | ALQEYR                  | sp P01009 A1AT_HUMAN  | RLGMFNIQHCK               | sp P02652 APOA2_HUMAN     | SPELQAEAK             |
| sp P19827 ITIH1_HUMAN | GHMLNHVER               | sp Q14624 ITIH4_HUMAN | TGLLLLSDPDK               | sp P02768 ALBU_HUMAN      | FKDLGEENFK            |
| sp P01619 KV320_HUMAN | FSGSGSGTDFTLTISR        | sp P02768 ALBU_HUMAN  | CCTESLVNR                 | sp P02647 APOA1_HUMAN     | LSPLGEEMR             |
| sp P01024 CO3_HUMAN   | FYYIYNEK                | sp P01859 IGHG2_HUMAN | GLPAPIEK                  | sp P43652 AFAM_HUMAN      | IAPQLSTEELVSLGEEK     |
| sp P01031 CO5_HUMAN   | GTVYNYR                 | sp P02768 ALBU_HUMAN  | AAFTECCQAADK              | sp P0DOY2 IGLC2_HUMAN     | TVAPTECS              |
| sp P01877 IGHA2_HUMAN | YLTWASR                 | sp P01024 CO3_HUMAN   | DICEEQVNSLPGSITK          | sp P00450 CERU_HUMAN      | LISVDTEHSNIYLQNGPDR   |
| sp P01024 CO3_HUMAN   | QPVPQQMTLK              | sp P08603 CFAH_HUMAN  | CFEGFGIDGPAIAK            | sp P01042 KNG1_HUMAN      | TVGSDTFYSEK           |
| sp P01011 AACT_HUMAN  | AVLDVFEEGTEASAATAVK     | sp Q9UGM5 FETUB_HUMAN | GGLGSLFYLTLDVLETDCHVLR    | sp P02768 ALBU_HUMAN      | LVTDLTK               |
| sp P01011 AACT_HUMAN  | ADLSGITGAR              | sp P01861 IGHG4_HUMAN | GFYPSDIAVEWESNGQPENNYK    | sp A0A0B4J1X5 HV374_HUMAN | FTISR                 |
| sp P04114 APOB_HUMAN  | SVSDGIAALDLNAVANK       | sp P02774 VTDB_HUMAN  | HLSLLTTLNLR               | sp P10909 CLUS_HUMAN      | ASSIIDELFQDR          |
| sp P0DOX6 IGM_HUMAN   | QVGSGVTTDQVQAEAK        | sp P0C0L5 CO4B_HUMAN  | GLEEELQFSLGSK             | sp P19827 ITIH1_HUMAN     | AAISGENAGLVR          |
| sp P00751 CFAB_HUMAN  | ALFVSEEEK               | sp P00450 CERU_HUMAN  | ERGPEEEHLGILGPVIWAEVGDITR | sp P01861 IGHG4_HUMAN     | STSESTAALGCLVK        |
| sp P0DOX8 IGL1_HUMAN  | ATLVCLISDFYPGAVTVAWK    | sp P02751 FINC_HUMAN  | NLQPASEYTVSLVAIK          | sp P01024 CO3_HUMAN       | QLYNVEATSYALLALLQLK   |
| sp P01024 CO3_HUMAN   | VQLSNDFDEYIMAIEQTIK     | sp P02775 CXCL7_HUMAN | ICLDPDAPR                 | sp P01834 IGKC_HUMAN      | VDNALQSGNSQESVTEQDSK  |
| sp P01011 AACT_HUMAN  | DYNLNDILLQLGIEEAFTSK    | sp P68871 HBB_HUMAN   | VLGAFSDGLAHLNLDNLK        | sp P08519 APOA_HUMAN      | GTYSTTVTGR            |
| sp O43866 CD5L_HUMAN  | LADGPGHCK               | sp P02768 ALBU_HUMAN  | SLHTLFGDKLCTVATLR         | sp P0DOX5 IGG1_HUMAN      | DTLMISR               |

|                           |                                    |                       |                                                                |                           |                                 |
|---------------------------|------------------------------------|-----------------------|----------------------------------------------------------------|---------------------------|---------------------------------|
| sp P02749 APOH_HUMAN      | TCPKPDDLPFSTVVPLK                  | sp P08603 CFAH_HUMAN  | SIDVACHPGYALPK                                                 | sp P02768 ALBU_HUMAN      | RHPYFYAPELFFAK                  |
| sp P02790 HEMO_HUMAN      | SLGPNSCSANGPGLYLIHGPNLY<br>CYSDVEK | sp P02768 ALBU_HUMAN  | EFNAETFTFHADICTLSEKER                                          | sp P01023 A2MG_HUMAN      | YNILPEKEEFPFALGVQTLPTQCD<br>EPK |
| sp P04003 C4BPA_HUMAN     | DTIVFK                             | sp P08603 CFAH_HUMAN  | EEYGHSEVVEYYCNPR                                               | sp P01031 CO5_HUMAN       | SYFPESWLWEVHLVPR                |
| sp A0A0C4DH68 KV224_HUMAN | FSGVPDR                            | sp P04004 VTNC_HUMAN  | DWHGVPGQVDAAMAGR                                               | sp A0A0C4DH67 KV108_HUMAN | LLIYAASTLQSGVPSR                |
| sp P02765 FETUA_HUMAN     | ATLSEK                             | sp P02768 ALBU_HUMAN  | LAKTYETTLEK                                                    | sp Q14624 ITIH4_HUMAN     | LWAYLTIQQLLEQTVSASDADQQ<br>ALR  |
| sp A0A0C4DH29 HV103_HUMAN | DTSASTAYMELSSLR                    | sp P01008 ANT3_HUMAN  | TSDQIHFFFAK                                                    | sp P0DOY2 IGLC2_HUMAN     | YAASSYLSLTPEQWK                 |
| sp O43866 CD5L_HUMAN      | LVGGDNLCSGR                        | sp P0C0L5 CO4B_HUMAN  | LPMSVR                                                         | sp P02746 C1QB_HUMAN      | FDHVITNMNNNYEPR                 |
| sp P01024 CO3_HUMAN       | KGYTQQLAFR                         | sp P01861 IGHG4_HUMAN | WQEGNVFSCSVMEALHNHYTQK<br>VWPQQPSGELFEIEIDTLETTCHVLDP<br>TPVAR | sp P01024 CO3_HUMAN       | RAPSTWLTAYVVK                   |
| sp P0C0L4 CO4A_HUMAN      | DSSTWLTAFVLK                       | sp P02765 FETUA_HUMAN | CPNPPVQENFDVNK                                                 | sp P00739 HPTR_HUMAN      | DIAPTLTLYVGK                    |
| sp P0C0L4 CO4A_HUMAN      | VTASDPLDTLGSEGALSPGGVA<br>SLLR     | sp P05090 APOD_HUMAN  | DFSLWEK                                                        | sp P01024 CO3_HUMAN       | DMALTAFLVLSLQEAK                |
| sp P02790 HEMO_HUMAN      | GECQAEGVLLFFQGDR                   | sp P04114 APOB_HUMAN  | RGHLFLQTDQPIYNPGQR                                             | sp P01861 IGHG4_HUMAN     | TTPPVLDSDGSFFLYSR               |
| sp P35858 ALS_HUMAN       | LAYLQPALFSGLAELR                   | sp P0C0L4 CO4A_HUMAN  | DADPDTFFAK                                                     | sp P10909 CLUS_HUMAN      | FMETVAEK                        |
| sp P02771 FETA_HUMAN      | YIQESQALAK                         | sp P43652 AFAM_HUMAN  | ESGVPDR                                                        | sp P01743 HV146_HUMAN     | DTSTSTVYMELSSLR                 |
| sp P01023 A2MG_HUMAN      | TFAQAR                             | sp P06312 KV401_HUMAN | YIFHNFMER                                                      | sp P00739 HPTR_HUMAN      | LRTEGDGVYTLNDK                  |
| sp P06727 APOA4_HUMAN     | LVPFATELHER                        | sp Q14624 ITIH4_HUMAN | SLGECDDVEDSTTCFNAK                                             | sp P02790 HEMO_HUMAN      | LLQDEFPGIPSPLDAAVECHR           |
| sp P01023 A2MG_HUMAN      | YGAATFTR                           | sp P02774 VTDB_HUMAN  | GEFVWK                                                         | sp P04114 APOB_HUMAN      | ESDEETQIK                       |
| sp P19823 ITIH2_HUMAN     | SSALDMENFR                         | sp P02790 HEMO_HUMAN  | VFSNGADLSGVTEEAPLK                                             | sp P05546 HEP2_HUMAN      | NFGYTLR                         |
| sp P01019 ANGT_HUMAN      | ALQDQLVLVAAK                       | sp P01009 A1AT_HUMAN  | ALVQQMEQLR                                                     | sp P19823 ITIH2_HUMAN     | HLEVDVWVIEPQGLR                 |
| sp P04114 APOB_HUMAN      | TEVIPLIENR                         | sp P06727 APOA4_HUMAN | KAADDTWEPFASGK                                                 | sp P19823 ITIH2_HUMAN     | AHVSEFKPTVAQQR                  |
| sp P02787 TRFE_HUMAN      | SKEFQLFSSPHGK                      | sp P02766 TTHY_HUMAN  | VGFYESDVMGR                                                    | sp P02787 TRFE_HUMAN      | EACVHK                          |
| sp P01861 IGHG4_HUMAN     | DTLMISR                            | sp P01023 A2MG_HUMAN  | CAEENCFIQK                                                     | sp P02649 APOE_HUMAN      | WVQTLSEVQVEELLSSQVTQELR         |
| sp Q92985 IRF7_HUMAN      | AWAVAR                             | sp P01024 CO3_HUMAN   | DLYSGLIGPLIVCR                                                 | sp P04196 HRG_HUMAN       | IADAHLDR                        |
| sp P19823 ITIH2_HUMAN     | LGSYEHR                            | sp P00450 CERU_HUMAN  |                                                                | sp P05156 CFAI_HUMAN      | GLETSLAECTFTK                   |

|                       |                               |                           |                                  |                           |                                 |
|-----------------------|-------------------------------|---------------------------|----------------------------------|---------------------------|---------------------------------|
| sp P27169 PON1_HUMAN  | EVQPVELPNCNLVK                | sp P02741 CRP_HUMAN       | GYSIFSATK                        | sp P01871 IGHM_HUMAN      | GFPSVLR                         |
| sp P02787 TRFE_HUMAN  | EDLIWELLNQAQEHLGKDK           | sp Q6Q759 SPG17_HUMAN     | VVIVERK                          | sp P01042 KNG1_HUMAN      | DIPTNSPELEETLTHTITK             |
| sp P0C0L4 CO4A_HUMAN  | VEYGFQVK                      | sp P02768 ALBU_HUMAN      | DAHKSEVAHR                       | sp A0A0C4DH72 KV106_HUMAN | VTITCR                          |
| sp P01859 IGHG2_HUMAN | DTLMISR                       | sp P04114 APOB_HUMAN      | QVFLYPEKDEPTYILNIK               | sp P02750 A2GL_HUMAN      | LHLEGNK                         |
| sp P01859 IGHG2_HUMAN | VVSVLTVVHQDWLNGK              | sp P0C0L4 CO4A_HUMAN      | YVSHFETEGPHVLLYFDSVPTSR          | sp P02768 ALBU_HUMAN      | ADLAK                           |
| sp P01042 KNG1_HUMAN  | ICVGCPR                       | sp A0A075B6P5 KV228_HUMAN | ASGVPDR                          | sp P01024 CO3_HUMAN       | KQELSEAEQATR                    |
| sp P0C0L4 CO4A_HUMAN  | YVLPNFEVK                     | sp P08603 CFAH_HUMAN      | GEWVALNPLR                       | sp P01871 IGHM_HUMAN      | ESDWLGQSMFTCR                   |
| sp P06727 APOA4_HUMAN | EAVEHLQK                      | sp P0C0L5 CO4B_HUMAN      | DHAVDLIQK                        | sp P02741 CRP_HUMAN       | RQDNEILIFWSK                    |
| sp P10909 CLUS_HUMAN  | IDSLENDR                      | sp P02765 FETUA_HUMAN     | QPNCDPETEEAALVAIDYINQNLPW<br>GYK | sp P01024 CO3_HUMAN       | GVFVLNK                         |
| sp O43866 CD5L_HUMAN  | LVGGLHR                       | sp P01009 A1AT_HUMAN      | DTEEDDFHVDQVTTVK                 | sp P05156 CFAI_HUMAN      | VFSLQWGEVK                      |
| sp P00450 CERU_HUMAN  | ALYLQYTDETFR                  | sp P01876 IGHA1_HUMAN     | DVLVR                            | sp P01023 A2MG_HUMAN      | AIGYLNTGYQR                     |
| sp P0C0L5 CO4B_HUMAN  | VTASDPLDTLGSEALSPGGVA<br>SLLR | sp P04114 APOB_HUMAN      | HLIDSLIDFLNFP                    | sp P02768 ALBU_HUMAN      | SHCIAEVENDEMPADLPSLAADFV<br>ESK |
| sp Q14624 ITIH4_HUMAN | GSEMVVAGK                     | sp P02751 FINC_HUMAN      | GEWTCIAYSQRL                     | sp P01023 A2MG_HUMAN      | TGTHGLLVK                       |
| sp P00450 CERU_HUMAN  | EFYLFPTVFDENESLLEDNIR         | sp P69905 HBA_HUMAN       | MFLSFPTTK                        | sp P00738 HPT_HUMAN       | YVMLPVADQDQCIR                  |
| sp P04114 APOB_HUMAN  | LPQQANDYLNFSNWER              | sp P01876 IGHA1_HUMAN     | SVTCHVK                          | sp P02763 A1AG1_HUMAN     | YVGGQEHFAHLLILR                 |
| sp P02763 A1AG1_HUMAN | EQLGEFYEALDCLR                | sp P04114 APOB_HUMAN      | TLQGIPQMIGEVIR                   | sp P01860 IGHG3_HUMAN     | LTVDK                           |
| sp P04004 VTNC_HUMAN  | SIAQYWLGCAPAGHL               | sp P01024 CO3_HUMAN       | KVEGTAFVIFGIQDGEQR               | sp P08603 CFAH_HUMAN      | VSVLCQENYLIQEGEETCK             |
| sp P02790 HEMO_HUMAN  | ELISER                        | sp P0C0L5 CO4B_HUMAN      | VLSLAQEQVGGSPK                   | sp P02771 FETA_HUMAN      | GQCIIHAENDEKPEGLSPNLNR          |
| sp P04114 APOB_HUMAN  | QAEAVLK                       | sp P0C0L4 CO4A_HUMAN      | ASAGLLGAHAAAITAYALTLTK           | sp P01024 CO3_HUMAN       | SEETKENEGFTVTAEGK               |
| sp P01008 ANT3_HUMAN  | DIPMNPNCIYR                   | sp P19823 ITIH2_HUMAN     | ALYAQAR                          | sp P08603 CFAH_HUMAN      | IDVHLPDR                        |
| sp P02787 TRFE_HUMAN  | DSSLCK                        | sp P00450 CERU_HUMAN      | HYYIGIIEETWDYASDHGEK             | sp P02768 ALBU_HUMAN      | LDELRDEGK                       |
| sp P00747 PLMN_HUMAN  | WELCDIPR                      | sp P02768 ALBU_HUMAN      | YLVEIAR                          | sp P02771 FETA_HUMAN      | GDVLDCLQDGEK                    |
| sp P01861 IGHG4_HUMAN | GLPSSIEK                      | sp P04114 APOB_HUMAN      | EVGTVLSQVYSK                     | sp P02787 TRFE_HUMAN      | EDPQTFYAVAVVK                   |
| sp P00734 THRB_HUMAN  | VIDQFGE                       | sp P0DOX6 IGM_HUMAN       | ESDWLGESMFTCR                    | sp P02771 FETA_HUMAN      | QEFLINLVK                       |

|                           |                    |                       |                         |                           |                        |
|---------------------------|--------------------|-----------------------|-------------------------|---------------------------|------------------------|
| sp P0DOX5 IGG1_HUMAN      | FTISR              | sp P00747 PLMN_HUMAN  | NPDGDVGGPWCYTTNPR       | sp P02771 FETA_HUMAN      | CCQGQEVEVCFABEEGQK     |
| sp P01023 A2MG_HUMAN      | GEAFTLK            | sp P02775 CXCL7_HUMAN | GKEESLSDSLYAELR         | sp P04114 APOB_HUMAN      | DNVFDGLVR              |
| sp P02768 ALBU_HUMAN      | ETCFABEEGK         | sp P02768 ALBU_HUMAN  | MPCAEDYLSVVLNQLCVLHEK   | sp P04217 A1BG_HUMAN      | FALVR                  |
| sp P02787 TRFE_HUMAN      | IECVSAETTEDCIAK    | sp P0C0L4 CO4A_HUMAN  | SCGLHQLLR               | sp Q8NGF3 O51D1_HUMAN     | IGLSALTR               |
| sp P02790 HEMO_HUMAN      | RLWWLDLK           | sp P01023 A2MG_HUMAN  | AHTSFQISLSVSYTGSR       | sp P02787 TRFE_HUMAN      | SCHTGLGR               |
| sp P01024 CO3_HUMAN       | TLDPER             | sp P0DOY2 IGLC2_HUMAN | ADSSPVK                 | sp P01024 CO3_HUMAN       | VHQYFNVELIQPGAVK       |
| sp P06727 APOA4_HUMAN     | SELTQQLNALFQDK     | sp P10909 CLUS_HUMAN  | EILSVCSTNNPSQAK         | sp P0C0L5 CO4B_HUMAN      | LQETSNWLLSQQADGSFQDLSP |
| sp P19823 ITIH2_HUMAN     | KLWAYLTINQLLAER    | sp P01024 CO3_HUMAN   | IWDVVEK                 | sp P43652 AFAM_HUMAN      | ESLLNHFLYEVAR          |
| sp P02790 HEMO_HUMAN      | YYCFQGNQFLR        | sp P05155 IC1_HUMAN   | TNLESILSYPK             | sp A0A0A0MT36 KVD21_HUMAN | VTITCR                 |
| sp P01861 IGHG4_HUMAN     | NQVSLTCLVK         | sp P02655 APOC2_HUMAN | STAAMSTYTGTGIFTDQVLSVLK | sp P01008 ANT3_HUMAN      | EVPLNTIIFMGR           |
| sp P01023 A2MG_HUMAN      | DMYSFLEDMGLK       | sp P02768 ALBU_HUMAN  | LVNEVTEFAK              | sp P0DOX6 IGM_HUMAN       | EQLNLR                 |
| sp P01031 CO5_HUMAN       | IIHFGTR            | sp P00751 CFAB_HUMAN  | DISEVVTPR               | sp P0C0L4 CO4A_HUMAN      | LPMSVR                 |
| sp P08603 CFAH_HUMAN      | SSQESYAHGTK        | sp P06727 APOA4_HUMAN | LGPHAGDVEGHLSFLEK       | sp P0C0L4 CO4A_HUMAN      | GQIVFMNR               |
| sp P0C0L4 CO4A_HUMAN      | AAANQMR            | sp P10643 CO7_HUMAN   | ELSHLPSLYDYSAYR         | sp P0C0L5 CO4B_HUMAN      | AACAQLNDFLQEYGTQGCQV   |
| sp P05155 IC1_HUMAN       | VTTSQDMLSIMEK      | sp P01700 LV147_HUMAN | SGTSASLAISGLR           | sp P04217 A1BG_HUMAN      | LELHVDGPPRPQLR         |
| sp P04003 C4BPA_HUMAN     | EDVYVVGTVLR        | sp P02768 ALBU_HUMAN  | RPCFSALEVDETYVPK        | sp P01042 KNG1_HUMAN      | AATGECTATVGK           |
| sp P02753 RET4_HUMAN      | LLNLDGTCADSYSFVFSR | sp P0DJ18 SAA1_HUMAN  | FFGHGAEDSLADQAANEWGR    | sp P04003 C4BPA_HUMAN     | QSSYSFFK               |
| sp P02042 HBD_HUMAN       | LHVDPENFR          | sp P02654 APOC1_HUMAN | EWFSETFQK               | sp P04114 APOB_HUMAN      | NIQEYLSILTDPDGK        |
| sp P25311 ZA2G_HUMAN      | WEAEPVYVQR         | sp P01011 AACT_HUMAN  | EIGELYLPK               | sp P01023 A2MG_HUMAN      | QSSEITR                |
| sp P02768 ALBU_HUMAN      | ETCFABEEGKK        | sp P01024 CO3_HUMAN   | ACEPGVDYVYK             | sp P01023 A2MG_HUMAN      | NEDSLVFVQTDK           |
| sp Q14624 ITIH4_HUMAN     | VQGNDSATR          | sp P01024 CO3_HUMAN   | VELLHNPAFCSLATTK        | sp P00736 C1R_HUMAN       | LPVANPQACENWLR         |
| sp P02748 CO9_HUMAN       | DVVLTTTFVDDIK      | sp P35542 SAA4_HUMAN  | GNYDAAQR                | sp P02787 TRFE_HUMAN      | KDSGFQMNQLR            |
| sp P13671 CO6_HUMAN       | DLHLSDVFLK         | sp P01019 ANGT_HUMAN  | VLSALQAVQGLLVAQGR       | sp P0DOX5 IGG1_HUMAN      | ALPAPIEK               |
| sp A0A0C4DH31 HV118_HUMAN | SDDTAVYYCAR        | sp Q14624 ITIH4_HUMAN | ETLFSVMPGLK             | sp P00739 HPTR_HUMAN      | QLVEIEK                |

|                       |                                      |                           |                                   |                           |                                 |
|-----------------------|--------------------------------------|---------------------------|-----------------------------------|---------------------------|---------------------------------|
| AN                    |                                      |                           |                                   |                           |                                 |
| sp P01591 IGJ_HUMAN   | IIVPLNNR                             | sp P0DJ18 SAA1_HUMAN      | GPGGVWAAEASDAR                    | sp P0C0L5 CO4B_HUMAN      | VFALDQK                         |
| sp P02790 HEMO_HUMAN  | GGYTLVSGYPK                          | sp P01011 AACT_HUMAN      | AKWEMPFDPQDTHQSR                  | sp Q14624 ITIH4_HUMAN     | NPLVWVHASPEHVVVTR               |
| sp P02649 APOE_HUMAN  | LAVYQAGAR                            | sp P01860 IGHG3_HUMAN     | VVSVLTVLHQDWLNGK                  | sp Q06033 ITIH3_HUMAN     | ESPGNVQIVNGYFVHFFAPQGLPV<br>VPK |
| sp P0C0L5 CO4B_HUMAN  | EGAIHR                               | sp P00738 HPT_HUMAN       | HYEGSTVPEK                        | sp P02647 APOA1_HUMAN     | VKDLATVYVDVLK                   |
| sp P01009 A1AT_HUMAN  | FLENEDRR                             | sp P00450 CERU_HUMAN      | VYPGEQYTYMLLATEEQSPGEGDGN<br>CVTR | sp O15162 PLS1_HUMAN      | IIDNMGQEVITLERPLR               |
| sp P04114 APOB_HUMAN  | VNWEEEEASGLLTSLK                     | sp P27169 PON1_HUMAN      | GIETGSEDLLEILPNGLAFISSGLK         | sp P02787 TRFE_HUMAN      | CDEWSVNSVGK                     |
| sp P00450 CERU_HUMAN  | VYVHLK                               | sp P0C0L5 CO4B_HUMAN      | LLATLCSAEVCQCAEGK                 | sp P01024 CO3_HUMAN       | VPVAVQGEDTVQSLTQGDGVAK          |
| sp P02787 TRFE_HUMAN  | FDEFFSEGCAPGSK                       | sp P02649 APOE_HUMAN      | FWDYLR                            | sp A0A0J9YVY3 HV741_HUMAN | AEDTAVYYCAR                     |
| sp P02787 TRFE_HUMAN  | KPVEEYANCHLAR                        | sp P00738 HPT_HUMAN       | TIAEN                             | sp P0DOX6 IGM_HUMAN       | VSVFVPPR                        |
| sp P01871 IGHM_HUMAN  | YFAHSILTVSEEEWNTGETYTCV<br>VAHEALPNR | sp P08603 CFAH_HUMAN      | ECDTDGWTNDIPICEVVK                | sp Q06033 ITIH3_HUMAN     | GMTNINDGLLR                     |
| sp P01008 ANT3_HUMAN  | LPGIVAEGR                            | sp P13671 CO6_HUMAN       | ENPAVIDFELAPIVDLVR                | sp P0DOX7 IGK_HUMAN       | DSTYLSSTLTLSK                   |
| sp P00450 CERU_HUMAN  | RQSEDSTFYLGER                        | sp P08603 CFAH_HUMAN      | EYHFGQAVR                         | sp P01023 A2MG_HUMAN      | GHFSISIPVK                      |
| sp P01008 ANT3_HUMAN  | GDDITMVLILPKPEK                      | sp P0DJ19 SAA2_HUMAN      | RGPGGAWAAEVISNAR                  | sp P19827 ITIH1_HUMAN     | VTYDVSR                         |
| sp P01871 IGHM_HUMAN  | GQPLSPEK                             | sp P00734 THRB_HUMAN      | TFGSGEADCLRPLFEK                  | sp P01780 HV307_HUMAN     | AEDTAVYYCAR                     |
| sp P43652 AFAM_HUMAN  | FTDSENVQQR                           | sp P01023 A2MG_HUMAN      | GVPIPNK                           | sp P0DOX7 IGK_HUMAN       | DIQMTQSPSTLSASVGDR              |
| sp P02787 TRFE_HUMAN  | DSGFQMNQLR                           | sp P01859 IGHG2_HUMAN     | EPQVYTLPPSREEMTK                  | sp P02787 TRFE_HUMAN      | SCHTAVGR                        |
| sp P00734 THRB_HUMAN  | LAACLEGNAEGLGTNYR                    | sp P0C0L4 CO4A_HUMAN      | GSVFLR                            | sp O95445 APOM_HUMAN      | NQEACELSNN                      |
| sp P01709 LV208_HUMAN | RPSGVPDR                             | sp A0A075B6P5 KV228_HUMAN | FSGSGSGTDFTLK                     | sp P04114 APOB_HUMAN      | YGMVAQVTQTLK                    |
| sp P02748 CO9_HUMAN   | GTVIDVTDVFNWASSINDAPVLI<br>SQK       | sp P0DOX2 IGA2_HUMAN      | VPPPPCCHPR                        | sp P01023 A2MG_HUMAN      | SDIAPVAR                        |
| sp P08697 A2AP_HUMAN  | WFLLEQPEIQVAHFPPK                    | sp P0C0L4 CO4A_HUMAN      | VFALDQK                           | sp P04196 HRG_HUMAN       | ADLFYDVEALDLESPK                |
| sp P04114 APOB_HUMAN  | NLQNNAEWVYQGAIR                      | sp A0A0C4DH25 KVD20_HUMAN | LLIYDASSRATGIPDR                  | sp P02750 A2GL_HUMAN      | VAAGAFQGLR                      |

|                       |                       |                           |                           |                           |                                      |
|-----------------------|-----------------------|---------------------------|---------------------------|---------------------------|--------------------------------------|
|                       |                       | UMAN                      |                           |                           |                                      |
| sp P02768 ALBU_HUMAN  | SEVAHR                | sp P01008 ANT3_HUMAN      | DDLTVSADFHK               | sp A0A0A0MRZ8 KVD11_HUMAN | LLIYDASNR                            |
| sp Q00975 CAC1B_HUMAN | AESGEPGAR             | sp P02790 HEMO_HUMAN      | VDGALCMEK                 | sp P01772 HV333_HUMAN     | AEDTAVYYCAR                          |
| sp P0C0L5 CO4B_HUMAN  | EELVYELNPLDHR         | sp P02749 APOH_HUMAN      | FICPLTGLWPINTLK           | sp P0C0L4 CO4A_HUMAN      | NFLVR                                |
| sp P00738 HPT_HUMAN   | SCAVAEGVYVVK          | sp P0C0L5 CO4B_HUMAN      | DKGQAGLQR                 | sp P02765 FETUA_HUMAN     | FSVVYAK                              |
| sp P0C0L5 CO4B_HUMAN  | AVGSGATFSHYYYMILSR    | sp P02768 ALBU_HUMAN      | LKECCEKPLEK               | sp P02766 TTHY_HUMAN      | VEIDTK                               |
| sp Q14624 ITIH4_HUMAN | QLGLPGPPDVPDHAAYHPFR  | sp P02743 SAMP_HUMAN      | GYVIKPLVWV                | sp P04004 VTNC_HUMAN      | TYLFK                                |
| sp P02775 CXCL7_HUMAN | KICLDPDAPR            | sp Q14624 ITIH4_HUMAN     | LPEGSVSLIILLTDGDPTVGETNPR | sp P00450 CERU_HUMAN      | SGAGTEDSACIPWAYYSTVDQVK              |
| sp P02649 APOE_HUMAN  | DADDLQK               | sp P02765 FETUA_HUMAN     | TVVQPSVGAAGPVVPPCPGR      | sp P02751 FINC_HUMAN      | DSMIWDCTCIGAGR                       |
| sp P05156 CFAI_HUMAN  | TMGYQDFADVVCYTQK      | sp A0M8Q6 IGLC7_HUMAN     | ADGSPVK                   | sp P35542 SAA4_HUMAN      | EALQGVGDMGR                          |
| sp P04217 A1BG_HUMAN  | GVTFLLR               | sp P02671 FIBA_HUMAN      | TVIGPDGHK                 | sp P08603 CFAH_HUMAN      | AGEQVTYTCATYYK                       |
| sp P19652 A1AG2_HUMAN | EYQTR                 | sp P0C0L4 CO4A_HUMAN      | GSFEPVGDVAVSK             | sp P02768 ALBU_HUMAN      | KLVAASQAALGL                         |
| sp P01009 A1AT_HUMAN  | LYHSEAFVNFVDTEEAK     | sp P01871 IGHM_HUMAN      | ESATITCLVTGFSPADVVFQWMQR  | sp P01024 CO3_HUMAN       | SGIPIVTSPIYQIHFTK                    |
| sp P02647 APOA1_HUMAN | VQPYLDDFQK            | sp P04114 APOB_HUMAN      | GVISIPR                   | sp P01834 IGKC_HUMAN      | RTVAAPSVFIFPPSDEQLK                  |
| sp O43866 CD5L_HUMAN  | IWLDNVR               | sp Q14624 ITIH4_HUMAN     | NVVFVIDK                  | sp P01009 A1AT_HUMAN      | FLENEDR                              |
| sp P02042 HBD_HUMAN   | VHLTPEEK              | sp P02649 APOE_HUMAN      | ALMDETMK                  | sp P01009 A1AT_HUMAN      | WERPFEVK                             |
| sp P01024 CO3_HUMAN   | VLLDGVQNPR            | sp A0A0B4J1Y9 HV372_HUMAN | FTISR                     | sp P04114 APOB_HUMAN      | TSSFALNPLTLPEVK                      |
| sp P0DOX8 IGL1_HUMAN  | VTVLGQPK              | sp P01009 A1AT_HUMAN      | TLNQPDSQLQLTTGNGLFLSEGLK  | sp P00747 PLMN_HUMAN      | NPDNDPQGPWCYTTDPEKR                  |
| sp P02771 FETA_HUMAN  | NIFLASFVHEYSR         | sp P08603 CFAH_HUMAN      | SITCIHGVWTQLPQCVAIDK      | sp P02751 FINC_HUMAN      | NTFAEVTGLSPGVTYFYFK                  |
| sp P01009 A1AT_HUMAN  | LYHSEAFVNFVDTEEAKK    | sp P01024 CO3_HUMAN       | ISLPESLK                  | sp P01023 A2MG_HUMAN      | EEFPFALGVQTLPQTCDEPK                 |
| sp P00739 HPTR_HUMAN  | TIAEN                 | sp P02790 HEMO_HUMAN      | VWVYPPEK                  | sp P0C0L5 CO4B_HUMAN      | KYVLPNFEVK                           |
| sp P04114 APOB_HUMAN  | QTIIVVLENVQR          | sp P0C0L4 CO4A_HUMAN      | ALEILQEEDLIDEDDIPVR       | sp P01876 IGHA1_HUMAN     | SGNTFRPEVHLLPPPSEELALNELV<br>TLTCLAR |
| sp P04114 APOB_HUMAN  | EFNLQNMGLPDFHIPENLFLK | sp P06727 APOA4_HUMAN     | SLAELGGHLDQQVEEFRR        | sp P0DOX2 IGA2_HUMAN      | SGNTFRPEVHLLPPPSEELALNELV<br>TLTCLAR |

|                       |                                    |                       |                                  |                       |                           |
|-----------------------|------------------------------------|-----------------------|----------------------------------|-----------------------|---------------------------|
| sp P01860 IGHG3_HUMAN | TPLGDTTHTCPR                       | sp P01024 CO3_HUMAN   | QGALELIK                         | sp P02768 ALBU_HUMAN  | ADDKETCFAEEGK             |
| sp P02647 APOA1_HUMAN | WQEEMELYR                          | sp P02787 TRFE_HUMAN  | SMGGKEDLIWELLNQAQEHFGK           | sp P01024 CO3_HUMAN   | SGSDEVQVGGQR              |
| sp P04114 APOB_HUMAN  | VQGVFESH                           | sp P04114 APOB_HUMAN  | GNVATEISTER                      | sp P02649 APOE_HUMAN  | AQAWGER                   |
| sp P00748 FA12_HUMAN  | LHEAFSPVSYQHDLALLR                 | sp P0DOX6 IGM_HUMAN   | VFAIPPSFASIFLTK                  | sp P04217 A1BG_HUMAN  | DAVLR                     |
| sp P01019 ANGT_HUMAN  | ADSQAQLLLSTVVGVTAPGLH<br>LK        | sp P05546 HEP2_HUMAN  | GGETAQSADPQWEQLNKK               | sp P01011 AACT_HUMAN  | LINDYVK                   |
| sp P0DOX7 IGK_HUMAN   | SGTASVVCLLNNFYPR                   | sp P02749 APOH_HUMAN  | ATFGCHDGYSLDGPEEIECTK            | sp P01591 IGJ_HUMAN   | IVLVDNK                   |
| sp P01619 KV320_HUMAN | LLIYGASSR                          | sp P19823 ITIH2_HUMAN | IYGNQDTSSQLK                     | sp P68871 HBB_HUMAN   | LLGNVLVLCVLAHFFGK         |
| sp P04003 C4BPA_HUMAN | LSLEIEQLELQR                       | sp P01024 CO3_HUMAN   | FISLGEACK                        | sp P02790 HEMO_HUMAN  | LDTSR                     |
| sp P01024 CO3_HUMAN   | SSLSVPYVIVPLK                      | sp P0C0L5 CO4B_HUMAN  | YVSHFETEGPHVLLYFDSVPTSR          | sp P02649 APOE_HUMAN  | QQTEWQSGQR                |
| sp P10909 CLUS_HUMAN  | TLLSNLEEAK                         | sp P02751 FINC_HUMAN  | VFAVSHGR                         | sp P02652 APOA2_HUMAN | EPCVESLVSQYFQTVTDYGK<br>N |
| sp P02656 APOC3_HUMAN | DALSSVQESQVAQQAR                   | sp P02647 APOA1_HUMAN | LREQLGPVTQEFWDNLEK               | sp P01599 KV117_HUMAN | LIYAASSLQSGVPSR           |
| sp P01871 IGHM_HUMAN  | YVTSAPMPEPQAPGR                    | sp Q14624 ITIH4_HUMAN | FSSHVGGTLGQFYQEVWLGSPAASD<br>DGR | sp P02753 RET4_HUMAN  | LIVHNGYCDGR               |
| sp P01859 IGHG2_HUMAN | NQVSLTCLVK                         | sp P05090 APOD_HUMAN  | NILTSNNIDVK                      | sp P06727 APOA4_HUMAN | GNTEGLQK<br>N             |
| sp O75636 FCN3_HUMAN  | ELLSQGATLSGWYHLCLPEGR              | sp P02753 RET4_HUMAN  | GNDDHWIVDTDYDTYAVQYSCR           | sp P01023 A2MG_HUMAN  | VSNQTLSLFFTVLQDVPVR       |
| sp P0DOX6 IGM_HUMAN   | ESATITCLVTGFSPADVQVWQW<br>QR       | sp P19827 ITIH1_HUMAN | GFSLDEATNLNGGLLR                 | sp P04114 APOB_HUMAN  | EVYGFNPEGK                |
| sp P02790 HEMO_HUMAN  | EVGTPHGIILDSVDAAFICPGSSR           | sp P0DOX5 IGG1_HUMAN  | VVSVLTVLHQDWLNGK                 | sp P01008 ANT3_HUMAN  | IPEATNR                   |
| sp P08603 CFAH_HUMAN  | IVSSAMEPDREYHFGQAVR                | sp P01876 IGHA1_HUMAN | SAVQGPPER                        | sp P08185 CBG_HUMAN   | NIFISPVISMALAMLSLGTGCHTR  |
| sp P02771 FETA_HUMAN  | APQLTSELMAITR                      | sp P01860 IGHG3_HUMAN | TTPMLDSDGSFFLYSK                 | sp P08603 CFAH_HUMAN  | NDFTWFK                   |
| sp P0C0L5 CO4B_HUMAN  | NPSDPMPQAPALWIETTAYALL<br>HLLLHEGK | sp P02656 APOC3_HUMAN | DKFSEFWLDPEVRPTSAVAA             | sp P01860 IGHG3_HUMAN | CPAPELLGGPSVFLFPPKPK      |
| sp P08603 CFAH_HUMAN  | LSYTCEGGFR                         | sp P25311 ZA2G_HUMAN  | HVEDVPAFQALGSLNDLQFFR            | sp P04114 APOB_HUMAN  | DKDQEVLLQTFLDDASPGDKR     |
| sp P01024 CO3_HUMAN   | AAVYHHFISDGVR                      | sp P01871 IGHM_HUMAN  | ESGPTTYK                         | sp P04114 APOB_HUMAN  | NNALDFVTK                 |
| sp P02649 APOE_HUMAN  | GEVQAMLGQSTEELR                    | sp P02787 TRFE_HUMAN  | SAGWNIPIGLLYCDLPEPR              | sp P06396 GELS_HUMAN  | AQPVQVAEGSEPDGFWEALGGK    |
| sp P06396 GELS_HUMAN  | EPGLQIWR                           | sp P02748 CO9_HUMAN   | GEIHLGR                          | sp P00747 PLMN_HUMAN  | NPADADKGPWCFTDPSVR        |

|                           |                          |                           |                                |                       |                       |
|---------------------------|--------------------------|---------------------------|--------------------------------|-----------------------|-----------------------|
| sp P0C0L4 CO4A_HUMAN      | AEFQDALEK                | sp P0C0L5 CO4B_HUMAN      | VQQPDCR                        | sp P01023 A2MG_HUMAN  | AYIFIDEAHITQALIWLSQR  |
| sp P02649 APOE_HUMAN      | SELEEQLTPVAEETR          | sp P06396 GELS_HUMAN      | AVEVLPK                        | sp P10643 CO7_HUMAN   | LIDQYGTHYLQSGSLGGEYR  |
| sp P04004 VTNC_HUMAN      | GQYCYELDEK               | sp P01876 IGHA1_HUMAN     | YLTWASR                        | sp P01877 IGHA2_HUMAN | WLQGSQELPR            |
| sp P07357 CO8A_HUMAN      | YNPVVIDFEMQPIHEVLR       | sp P35858 ALS_HUMAN       | DLHFLEELQLGHNR                 | sp P06396 GELS_HUMAN  | GASQAGAPQGR           |
| sp P01042 KNG1_HUMAN      | LGQSLDCNAEVYVVPWEK       | sp P00450 CERU_HUMAN      | VNKDDEEFIESNK                  | sp P01876 IGHA1_HUMAN | VAAEDWK               |
| sp P02766 TTHY_HUMAN      | AADDTWEPFASGK            | sp A0A0J9YXX1 HV5X1_HUMAN | GLEWMGR                        | sp P00738 HPT_HUMAN   | VTSIQDWVQK            |
| sp P01023 A2MG_HUMAN      | NALFCLESARK              | sp P01024 CO3_HUMAN       | NEQVEIR                        | sp P04217 A1BG_HUMAN  | ELLVPR                |
| sp P00739 HPTR_HUMAN      | SCAVAEYGVYVK             | sp Q66K66 TM198_HUMAN     | MPGTVATLR                      | sp Q08380 LG3BP_HUMAN | GQWGTVCDNLWDLTASVCCR  |
| sp Q14624 ITIH4_HUMAN     | RLDYQEGPPGVEISCWSVEL     | sp P01023 A2MG_HUMAN      | LPPNVVEESAR                    | sp P04114 APOB_HUMAN  | QIDDIDVR              |
| sp P00450 CERU_HUMAN      | QYTDSTFR                 | sp P02771 FETA_HUMAN      | LTTLER                         | sp P0DOX2 IGA2_HUMAN  | WLQGSQELPR            |
| sp P0C0L4 CO4A_HUMAN      | VLSLAQEQVGGSPK           | sp P01024 CO3_HUMAN       | TELRPGETLNVNLLR                | sp Q14624 ITIH4_HUMAN | LGVEYELLLK            |
| sp P04114 APOB_HUMAN      | EQHLFLPFSYK              | sp P01024 CO3_HUMAN       | VFSLAVNLIADSQVLCGAVK           | sp P01024 CO3_HUMAN   | SEFPESWLWNVEDLKEPPK   |
| sp P04196 HRG_HUMAN       | DGYLFQLLR                | sp P00751 CFAB_HUMAN      | EKLQDEDLGF                     | sp P01023 A2MG_HUMAN  | AGAFCLSEDAGLGISSTASLR |
| sp P02751 FINC_HUMAN      | ATITGYR                  | sp P10643 CO7_HUMAN       | DGFVQDEGTMFPVGK                | sp P0C0L4 CO4A_HUMAN  | DFALLSLQVPLKDAK       |
| sp P01876 IGHA1_HUMAN     | WLQGSQELPR               | sp P02652 APOA2_HUMAN     | EQLTPLIK                       | sp P02654 APOC1_HUMAN | EFGNTLEDK             |
| sp P02787 TRFE_HUMAN      | AVGNLR                   | sp P00734 THRB_HUMAN      | SGIECQLWR                      | sp P00736 C1R_HUMAN   | IAHDLR                |
| sp P10909 CLUS_HUMAN      | ELDESLQVAER              | sp P04114 APOB_HUMAN      | IDDIWNLEVK                     | sp P06727 APOA4_HUMAN | LAPLAEDVR             |
| sp P02787 TRFE_HUMAN      | DLLFK                    | sp P00734 THRB_HUMAN      | GQQYQGR                        | sp P01023 A2MG_HUMAN  | TEHPFTVEEFVLPK        |
| sp P02647 APOA1_HUMAN     | DLEEVK                   | sp P02748 CO9_HUMAN       | AEQCCEETASSISLHGK              | sp P02751 FINC_HUMAN  | GNLLQCICTGNR          |
| sp A0A0C4DH25 KVD20_HUMAN | FSGSGSGTDFTLTISR         | sp P0C0L4 CO4A_HUMAN      | HLVPGAPFLQALVR                 | sp P02771 FETA_HUMAN  | YGHSDCCSQSEGR         |
| sp P08697 A2AP_HUMAN      | HQMDLVATLSQLGLQELFQAPDLR | sp P02649 APOE_HUMAN      | EQVAEVR                        | sp P00734 THRB_HUMAN  | IYIHR                 |
| sp P01023 A2MG_HUMAN      | ATVLNYLPK                | sp P01024 CO3_HUMAN       | LESEETMVLEAHDAQGDVPVTVTVHDFPGK | sp P0C0L4 CO4A_HUMAN  | EGAIHR                |



|                       |                                        |                      |                                |                           |                                  |
|-----------------------|----------------------------------------|----------------------|--------------------------------|---------------------------|----------------------------------|
| sp P02763 A1AG1_HUMAN | TYMLAFDVNDEK                           | sp P10643 CO7_HUMAN  | NVVTTCNEGYSLIGNPVAR            | sp P05155 IC1_HUMAN       | GVTSVSQIFHSPDLAIR                |
| sp P02751 FINC_HUMAN  | ITYGETGGNSPVQEFTVPGSK                  | sp P02749 APOH_HUMAN | ATVVYQGER                      | sp P02647 APOA1_HUMAN     | ETEGLR                           |
| sp P01023 A2MG_HUMAN  | SASNMAIVDVK                            | sp P01023 A2MG_HUMAN | GPTQEFK                        | sp P01742 HV169_HUMAN     | SEDTAVYYCAR                      |
| sp P01834 IGKC_HUMAN  | VDNALQSGNSQESVTEQDSKDS<br>TYSLSSTLTLSK | sp P00450 CERU_HUMAN | VDKDNEDFQESNR                  | sp A0A0J9YXX1 HV5X1_HUMAN | ASDTAMYCAR                       |
| sp P05155 IC1_HUMAN   | DFTCVHQALK                             | sp P00747 PLMN_HUMAN | NLDENYCR                       | sp P01042 KNG1_HUMAN      | QVVAGLNFR                        |
| sp P05546 HEP2_HUMAN  | FTVDRPFLFLIYEHR                        | sp P0C0L5 CO4B_HUMAN | LHLETDSLALVALGALDTALYAAGS<br>K | sp P0C0L4 CO4A_HUMAN      | ECVGFQEVQVGLVQPASATL<br>YDYNNPER |
| sp P02760 AMBP_HUMAN  | VVAQGVGIPEDSIFTMADR                    | sp P05155 IC1_HUMAN  | LEDMEQALSPSVFK                 | sp P00751 CFAB_HUMAN      | DLLYIGK                          |
| sp P02768 ALBU_HUMAN  | LCTVATLR                               | sp P00738 HPT_HUMAN  | QLVEIEK                        | sp P06727 APOA4_HUMAN     | IDQTVEELRR                       |
| sp P01860 IGHG3_HUMAN | EPQVYTLPPSR                            | sp P02768 ALBU_HUMAN | VFDEFKPLVEEPQNLK               | sp P01009 A1AT_HUMAN      | AVLTIDEK                         |
| sp P01024 CO3_HUMAN   | AVLYNYR                                | sp P01024 CO3_HUMAN  | ILLQGTQVPAQMTEDAVER            | sp P01008 ANT3_HUMAN      | IEDGFSLK                         |
| sp P02766 TTHY_HUMAN  | ALGISPFHEHADEVVFTANDSGPR               | sp P00734 THRB_HUMAN | SPQELLCGASLISDR                | sp P06727 APOA4_HUMAN     | LGEVNTYAGDLQK                    |
| sp P0C0L5 CO4B_HUMAN  | ECVGFQEVQVGLVQPASAT<br>LYDYNNPER       | sp P00751 CFAB_HUMAN | DFHINLFQVLPWLK                 | sp P02787 TRFE_HUMAN      | IMNGEADAMSLDGGFVYIAGK            |
| sp P04114 APOB_HUMAN  | VLVDHFGYTK                             | sp P04217 A1BG_HUMAN | TPGAAANLELIFVGPQHAGNYR         | sp P01602 KV105_HUMAN     | DIQMTQSPSTLSASVGDR               |
| sp P02655 APOC2_HUMAN | ESLSSYWESAK                            | sp P02753 RET4_HUMAN | QEELCLAR                       | sp P06310 KV230_HUMAN     | FSGSGSGTDFTLK                    |
| sp P02743 SAMP_HUMAN  | DNELLVYK                               | sp P02768 ALBU_HUMAN | LVRPEVDVMCTAFHDNEETFLKK        | sp P0C0L4 CO4A_HUMAN      | VDFTLSSER                        |
| sp P36955 PEDF_HUMAN  | LTQVEHR                                | sp P01009 A1AT_HUMAN | KLSSWVLLMK                     | sp P00450 CERU_HUMAN      | QSEDSTFYLGGER                    |
| sp P02760 AMBP_HUMAN  | ETLLQDFR                               | sp P02771 FETA_HUMAN | ESSLLNQHACAVMK                 | sp P00738 HPT_HUMAN       | ILGGHLDK                         |
| sp P02647 APOA1_HUMAN | LLDNWDSVTSTFSK                         | sp P02774 VTDB_HUMAN | VCSQYAAAYGEK                   | sp P02765 FETUA_HUMAN     | VVHAAK                           |
| sp P02768 ALBU_HUMAN  | QEPERNECFLOHK                          | sp P00738 HPT_HUMAN  | VGYSVSWGR                      | sp P00738 HPT_HUMAN       | VMPICLPSKDYAEVGR                 |
| sp P02787 TRFE_HUMAN  | SASDLTWDNLK                            | sp P04217 A1BG_HUMAN | SLPAPWLSMAPVSWITPGLK           | sp P0DJ18 SAA1_HUMAN      | GNYDAAK                          |
| sp P01031 CO5_HUMAN   | ELSYYSLEDLNNK                          | sp P01024 CO3_HUMAN  | QLANGVDR                       | sp P31513 FMO3_HUMAN      | GVFPPLLEK                        |
| sp P02768 ALBU_HUMAN  | ETYGEMADCCAK                           | sp P02768 ALBU_HUMAN | QEPERNECFLOHKDDNPPLPR          | sp P04003 C4BPA_HUMAN     | FSAICQGDGTWSPR                   |

|                           |                             |                           |                        |   |                       |                        |
|---------------------------|-----------------------------|---------------------------|------------------------|---|-----------------------|------------------------|
| sp P02746 C1QB_HUMAN      | LEQGENVFLQATDK              | sp P01782 HV309_HUMAN     | AEDTALYYCAK            | N | sp P00450 CERU_HUMAN  | DIFTGLIGPMK            |
| sp Q96PD5 PGRP2_HUMAN     | GSQTQSHPDLGTEGCWDQLSAP<br>R | sp P02790 HEMO_HUMAN      | LWWLDLK                |   | sp P02768 ALBU_HUMAN  | QEPER                  |
| sp P01024 CO3_HUMAN       | LLPVGR                      | sp O43866 CD5L_HUMAN      | ELGCGAASGTPSGILYEPPAEK |   | sp P01591 IGJ_HUMAN   | MVETALTPDACYPD         |
| sp P19652 A1AG2_HUMAN     | EHVAHLLFLR                  | sp P0DOX2 IGA2_HUMAN      | EVQLVETGGGLIQPGGSLR    |   | sp P19823 ITIH2_HUMAN | HADPDFTR               |
| sp P02787 TRFE_HUMAN      | QQQHFLGNSVTDTCGDFCLFR       | sp P02042 HBD_HUMAN       | VLGAFSDGLAHLNLK        |   | sp P01023 A2MG_HUMAN  | QQNAQGGFSTQDTVVALHALSK |
| sp P04114 APOB_HUMAN      | HINIDQFVR                   | sp P01009 A1AT_HUMAN      | LSSWVLLMK              |   | sp Q14624 ITIH4_HUMAN | FAHTVVTSR              |
| sp P01024 CO3_HUMAN       | WLNEQR                      | sp A0A075B6K4 LV310_HUMAN | RPSGIPER               |   | sp P0DOX8 IGL1_HUMAN  | ADGSPVK                |
| sp P0CF74 IGLC6_HUMAN     | SYSCQVTHEGSTVEK             | sp P0DOX8 IGL1_HUMAN      | SYSCQVTHEGSTVEK        |   | sp P27169 PON1_HUMAN  | ALYCEL                 |
| sp P10643 CO7_HUMAN       | AASGTQNNVLR                 | sp P02787 TRFE_HUMAN      | KPVDEYK                |   | sp P0DOX2 IGA2_HUMAN  | YLTWASR                |
| sp P01023 A2MG_HUMAN      | TAQEGDHGSHVYTK              | sp P25311 ZA2G_HUMAN      | AYLEEECPATLR           |   | sp P08603 CFAH_HUMAN  | EIMENYNIALR            |
| sp P01024 CO3_HUMAN       | QKPDGVFQEDAPVIHQEMIGGL<br>R | sp P01860 IGHG3_HUMAN     | NQVSLTCLVK             |   | sp P06396 GELS_HUMAN  | EGGQTAPASTR            |
| sp P07951 TPM2_HUMAN      | IVTNNLK                     | sp P19827 ITIH1_HUMAN     | ILGDMQPGDYFDLVLFGR     |   | sp P0C0L4 CO4A_HUMAN  | LTSLSDR                |
| sp P10909 CLUS_HUMAN      | SGSGLVGR                    | sp P01860 IGHG3_HUMAN     | DTLMISR                |   | sp P02768 ALBU_HUMAN  | RMPCAEDYLSVVLNQLCVLHEK |
| sp P01023 A2MG_HUMAN      | AFQPFVVELTMPYSVIR           | sp P02768 ALBU_HUMAN      | NECFLQHK               |   | sp P02671 FIBA_HUMAN  | HPDEAAFFDTASTGK        |
| sp P00747 PLMN_HUMAN      | ATTVTGTPCQDWAAQEPHR         | sp P01009 A1AT_HUMAN      | VVNPTQK                |   | sp P04217 A1BG_HUMAN  | IFFHLNAVALGDGGHYTCR    |
| sp Q86T65 DAAM2_HUMAN     | FLYEMSR                     | sp P02774 VTDB_HUMAN      | VPTADLEDVLPLAEDITNILSK |   | sp P04114 APOB_HUMAN  | HSITNPLAVLCEFISQSIK    |
| sp P01023 A2MG_HUMAN      | DTVIKPLLVEPEGLEK            | sp P0C0L4 CO4A_HUMAN      | DFALLSLQVPLK           |   | sp P00736 C1R_HUMAN   | TLDEFTIIQNLQPQYQFR     |
| sp P02042 HBD_HUMAN       | VVAGVANALAHK                | sp P02743 SAMP_HUMAN      | AYSDSLRS               |   | sp P01619 KV320_HUMAN | ATLSCR                 |
| sp A0A0A0MRZ8 KVD11_HUMAN | ATLSCR                      | sp P02768 ALBU_HUMAN      | NECFLQHKDDNPNLPR       |   | sp P02787 TRFE_HUMAN  | NPDPWAK                |
| sp P36955 PEDF_HUMAN      | DTDTGALLFIGK                | sp A0A0C4DH67 KV108_HUMAN | VTITCR                 |   | sp P0DOX2 IGA2_HUMAN  | FTISR                  |
| sp P00734 THRB_HUMAN      | KPVAFSDYIHPVCLPDR           | sp P02787 TRFE_HUMAN      | DKEACVHK               |   | sp P0C0L4 CO4A_HUMAN  | ANSFLGEK               |
| sp P00739 HPTR_HUMAN      | SDLGAVISLLLWGR              | sp P01011 AACT_HUMAN      | MEEVEAMLLPETLK         |   | sp P02763 A1AG1_HUMAN | DKCEPLEK               |

|                       |                               |                       |                      |                           |                                         |
|-----------------------|-------------------------------|-----------------------|----------------------|---------------------------|-----------------------------------------|
| sp P01861 IGHG4_HUMAN | LTVDK                         | sp P0C0L4 CO4A_HUMAN  | VVEEQESR             | sp P04114 APOB_HUMAN      | AQONLYQELLTQEGQASFQGLK                  |
| sp P0C0L4 CO4A_HUMAN  | STQDTVIALDALSAYWIASHTTE<br>ER | sp P04430 KV116_HUMAN | VTITCR               | sp P08603 CFAH_HUMAN      | SLGNVIMVCR                              |
| sp P0C0L4 CO4A_HUMAN  | VGDTLNLNLR                    | sp P19827 ITIH1_HUMAN | LWAYLTIQELLAK        | sp P01876 IGHA1_HUMAN     | NFPPSQDASGDLYTTSSQLTLPAT<br>QCLAGK      |
| sp P0C0L5 CO4B_HUMAN  | VHYTVCIWR                     | sp P01008 ANT3_HUMAN  | VAEGTQVLELPGK        | sp P02774 VTDB_HUMAN      | DVCDPGNTK                               |
| sp P01860 IGHG3_HUMAN | GPSVFPLAPCSR                  | sp P0C0L5 CO4B_HUMAN  | TYNVLDMK             | sp P02774 VTDB_HUMAN      | EFSHLGK                                 |
| sp P19823 ITIH2_HUMAN | AEDHFSVIDFNQNR                | sp P00734 THRB_HUMAN  | ENLDR                | sp Q14624 ITIH4_HUMAN     | LALDNGGLAR                              |
| sp P01024 CO3_HUMAN   | APSTWLTAYVVK                  | sp P02741 CRP_HUMAN   | AFVFPK               | sp P00450 CERU_HUMAN      | IDTINLFPATLFDAYMVAQNPGEW<br>MLSCQNLNHLK |
| sp P01024 CO3_HUMAN   | SVQLTEK                       | sp P0DOX5 IGG1_HUMAN  | NQVSLTCLVK           | sp P01877 IGHA2_HUMAN     | DVLVR                                   |
| sp P00734 THRB_HUMAN  | ELLESYIDGR                    | sp P04114 APOB_HUMAN  | LLLMGAR              | sp P00450 CERU_HUMAN      | EYTDASFTRN                              |
| sp O00159 MYO1C_HUMAN | GFVLR                         | sp P02787 TRFE_HUMAN  | LCMGSGNLNCEPNK       | sp P02790 HEMO_HUMAN      | DGWHWSPIAHQWPQGPSAVDAA<br>FSWEEK        |
| sp P01780 HV307_HUMAN | FTISR                         | sp P02750 A2GL_HUMAN  | DLLLPQDLR            | sp P00739 HPTR_HUMAN      | LPECEAVCGKPK                            |
| sp P00739 HPTR_HUMAN  | KQLVEIEK                      | sp P05155 IC1_HUMAN   | FQPTLLTLPR           | sp P04114 APOB_HUMAN      | NIILPVYDK                               |
| sp P01024 CO3_HUMAN   | TVMVNIENPEGIPVK               | sp P02763 A1AG1_HUMAN | SDVVYTDWK            | sp P0C0L4 CO4A_HUMAN      | VQQPDCR                                 |
| sp P04004 VTNC_HUMAN  | DVWGIEGPIDAAFTR               | sp P02649 APOE_HUMAN  | ELQAAQAR             | sp O14791 APOL1_HUMA<br>N | VNEPSILEMSR                             |
| sp P02787 TRFE_HUMAN  | ADRDQYELLCLDNTR               | sp P02649 APOE_HUMAN  | VQAAVGTSAAPVPSDNH    | sp P18428 LBP_HUMAN       | GLQYAAQEGLLALQSELLR                     |
| sp P04114 APOB_HUMAN  | ITLPDFR                       | sp P02656 APOC3_HUMAN | GWVTDGFSSLK          | sp P02748 CO9_HUMAN       | AIEDYINEFSVR                            |
| sp P00450 CERU_HUMAN  | GAYPLSIEPIGVR                 | sp P02760 AMBP_HUMAN  | EYCGVPGDGDEELLR      | sp P01009 A1AT_HUMAN      | IVDLVK                                  |
| sp P0DOX8 IGL1_HUMAN  | RPSGVPDR                      | sp P01031 CO5_HUMAN   | EGMLSIMSYR           | sp P05090 APOD_HUMAN      | WYEIEK                                  |
| sp P0C0L4 CO4A_HUMAN  | GLESQTK                       | sp P02768 ALBU_HUMAN  | TYETTLEK             | sp P00751 CFAB_HUMAN      | GDSGGPLIVHK                             |
| sp P02768 ALBU_HUMAN  | SLHTLFGDK                     | sp P0C0L5 CO4B_HUMAN  | SCGLHQLLR            | sp P04217 A1BG_HUMAN      | SWVPHTFESESDPVPELLVAES                  |
| sp P02765 FETUA_HUMAN | AHYDLR                        | sp P00739 HPTR_HUMAN  | GSFPWQAK             | sp P02774 VTDB_HUMAN      | ELPEHTVK                                |
| sp P02787 TRFE_HUMAN  | CSTSSLLEACTFR                 | sp O43866 CD5L_HUMAN  | NTCNHDEDTWVECEDPFDLR | sp P01009 A1AT_HUMAN      | ELDRDRTVFALVNYIFFK                      |
| sp P02774 VTDB_HUMAN  | VLEPTLK                       | sp P01591 IGJ_HUMAN   | SSEDPNEDIVER         | sp P01877 IGHA2_HUMAN     | DLCGCYSVSSVLPGCAQPWNHGE<br>TFTCTAAHPELK |

|                           |                                     |                           |                                    |                           |                        |
|---------------------------|-------------------------------------|---------------------------|------------------------------------|---------------------------|------------------------|
| sp P08603 CFAH_HUMAN      | SPDVIINGSPISQK                      | sp A0A0B4J1X5 HV374_HUMAN | AEDTAVYYCAR                        | sp P02768 ALBU_HUMAN      | ECCEKPLEK              |
| sp P04217 A1BG_HUMAN      | HQFLLTGDTQGR                        | sp P0C0L4 CO4A_HUMAN      | LQETSNWLLSQQADGSFQDPCPVLD<br>R     | sp P01023 A2MG_HUMAN      | YSDASDCHGEDSQAFCEK     |
| sp P02768 ALBU_HUMAN      | TPVSDR                              | sp P02787 TRFE_HUMAN      | KASYLDCIR                          | sp Q9H1C0 LPAR5_HUMAN     | LVAASVPARDR            |
| sp P00738 HPT_HUMAN       | KQLVEIEK                            | sp P02746 C1QB_HUMAN      | TINVPLR                            | sp P02649 APOE_HUMAN      | LQAEAFQAR              |
| sp P02765 FETUA_HUMAN     | EATEAAK                             | sp P02647 APOA1_HUMAN     | DSGRDYVSQFEGSALGK                  | sp P0C0L4 CO4A_HUMAN      | VHYTVCIWR              |
| sp P02787 TRFE_HUMAN      | WCALSHHER                           | sp P04004 VTNC_HUMAN      | RVDTVDPYPYR                        | sp P02750 A2GL_HUMAN      | GPLQLER                |
| sp P01877 IGHA2_HUMAN     | SGNTRPEVHLLPPPSEELALNE<br>LVTLTCLAR | sp P01011 AACT_HUMAN      | FTEDAK                             | sp A0A075B6S2 KVD29_HUMAN | FSGSGSGTDFTLK          |
| sp P02787 TRFE_HUMAN      | DYELLCLDGTR                         | sp P00738 HPT_HUMAN       | SPVGVQPILNEHTFCAGMSK               | sp P01042 KNG1_HUMAN      | DFVQPPTK               |
| sp Q96PD5 PGRP2_HUMAN     | AGLLRPDYALLGHR                      | sp P01024 CO3_HUMAN       | DTWVEHWPEEDECQDEENQK               | sp P0C0L4 CO4A_HUMAN      | KYVLPNFEVK             |
| sp P08603 CFAH_HUMAN      | DGWSAQPTCIK                         | sp P01780 HV307_HUMAN     | GLEWVANIK                          | sp P02751 FINC_HUMAN      | VTIMWTPPESAVTGYR       |
| sp P06727 APOA4_HUMAN     | RVEPYGENFNK                         | sp P04114 APOB_HUMAN      | GFEPTLEALFGK                       | sp P0DOY2 IGLC2_HUMAN     | ATLVCLISDFYPGAVTVAWK   |
| sp P07360 CO8G_HUMAN      | YGFCEAADQFHVLDDEV                   | sp P02751 FINC_HUMAN      | SYTITGLQPGTDYK                     | sp P04196 HRG_HUMAN       | DSPVLIDFFEDTER         |
| sp P02775 CXCL7_HUMAN     | GTHCNQVEVIATLK                      | sp P02768 ALBU_HUMAN      | KQTALVELVK                         | sp P02751 FINC_HUMAN      | DLQFVEVTDVK            |
| sp A0A075B6S2 KVD29_HUMAN | FSGVPDR                             | sp P01871 IGHM_HUMAN      | VFAIPPSFASIFLTK                    | sp P0C0L5 CO4B_HUMAN      | GLESQTK                |
| sp P02751 FINC_HUMAN      | ESKPLTAQQTTK                        | sp P02768 ALBU_HUMAN      | KVPQVSTPTLVEVSR                    | sp P01782 HV309_HUMAN     | LSCAASGFTFDDYAMHWVR    |
| sp P01024 CO3_HUMAN       | GQGTLVVTMYHAK                       | sp P01011 AACT_HUMAN      | WEMPFDPQDTHQSR                     | sp P01859 IGHG2_HUMAN     | LTVDK                  |
| sp P01023 A2MG_HUMAN      | HYDGSYSTFGER                        | sp P06312 KV401_HUMAN     | ATINCK                             | sp P01023 A2MG_HUMAN      | VSVQLEASPAFLAVPVEK     |
| sp P06312 KV401_HUMAN     | LLIYWASTR                           | sp Q14624 ITIH4_HUMAN     | FSSHVGGTILGQFYQEVWLGSPAASD<br>DGRR | sp P0C0L5 CO4B_HUMAN      | VETVDR                 |
| sp P04196 HRG_HUMAN       | QIGSVYR                             | sp P0C0L5 CO4B_HUMAN      | VEYGFQVK                           | sp P00450 CERU_HUMAN      | GEFYIGSK               |
| sp P02787 TRFE_HUMAN      | EGTCPEAPTDECKPVK                    | sp P0DOX5 IGG1_HUMAN      | LTVDK                              | sp P02787 TRFE_HUMAN      | KPVDEYKDCHLAQVPSHTVVAR |
| sp P02760 AMBP_HUMAN      | ECLQTCR                             | sp P25311 ZA2G_HUMAN      | IDVHWTR                            | sp P06681 CO2_HUMAN       | AVISPGFDVFAK           |
| sp P08603 CFAH_HUMAN      | WQSIPLCVEK                          | sp Q03591 FHR1_HUMAN      | EIMENYNIALR                        | sp P01009 A1AT_HUMAN      | TDTSHHDQDHPTFNK        |

|                       |                          |                       |                                      |                           |                                    |
|-----------------------|--------------------------|-----------------------|--------------------------------------|---------------------------|------------------------------------|
| sp P04003 C4BPA_HUMAN | EEHYECDK                 | sp P04114 APOB_HUMAN  | ENFAGEATLQR                          | sp P02768 ALBU_HUMAN      | YICENQDSISSK                       |
| sp P25311 ZA2G_HUMAN  | AGEVQEPELR               | sp P0C0L4 CO4A_HUMAN  | VDVQAGACEGK                          | sp P04114 APOB_HUMAN      | ALVEQGFTVPEIK                      |
| sp P01023 A2MG_HUMAN  | LHTEAQIQEEGTVVELTGR      | sp P02750 A2GL_HUMAN  | DGFDISGNPWICDQNLSDLYR                | sp P01024 CO3_HUMAN       | LPYSVVR                            |
| sp P02647 APOA1_HUMAN | KWQEEMELYR               | sp P0CF74 IGLC6_HUMAN | AAPSVTLFPPSSEELQANK                  | sp P19823 ITIH2_HUMAN     | VQSTITSR                           |
| sp P01860 IGHG3_HUMAN | EPQVYTLPPSREEMTK         | sp P10643 CO7_HUMAN   | SCVGETTESTQCEDEELEHLR                | sp P01023 A2MG_HUMAN      | SLFTDLEAENDVLHCVAFAVPK             |
| sp P02748 CO9_HUMAN   | FEGIACEISK               | sp P00450 CERU_HUMAN  | DVDKEFYLFPTVFDENESLLEDNIR            | sp P02787 TRFE_HUMAN      | DQYELLCLDNTR                       |
| sp P0DOX2 IGA2_HUMAN  | GTTVTVSSASPTSPK          | sp P02750 A2GL_HUMAN  | LQELHLSSNGLESLSPEFLRPVPQLR           | sp P23083 HV102_HUMAN     | SDDTAVYYCAR                        |
| sp P02647 APOA1_HUMAN | DLATVYVDVLK              | sp P00739 HPTR_HUMAN  | NPANPVQR                             | sp P08603 CFAH_HUMAN      | AVYTCNEGYQLLGEINYR                 |
| sp P01024 CO3_HUMAN   | ASHLGLAR                 | sp P01024 CO3_HUMAN   | SLYVSATVILHSGSDMVQAER                | sp P36955 PEDF_HUMAN      | ALYYDLISSPDIHGTYK                  |
| sp P01042 KNG1_HUMAN  | TWQDCEYK                 | sp P0C0L5 CO4B_HUMAN  | HLVPGAPFLQALVR                       | sp Q96PD5 PGRP2_HUMAN     | EFTEAFLGCPAIHPR                    |
| sp Q9UPR6 ZFR2_HUMAN  | VLGMDLLPPR               | sp P01591 IGJ_HUMAN   | CYTAVVPLVYGGETK                      | sp P02751 FINC_HUMAN      | DDKESVPISDTHIPVPPPTDLR             |
| sp P05155 IC1_HUMAN   | LVLLNAIYLSAK             | sp P19823 ITIH2_HUMAN | FYNQVSTPLLR                          | sp P0C0L5 CO4B_HUMAN      | VGDTLNLNLR                         |
| sp P00751 CFAB_HUMAN  | DLEIEVVLFHPNYNINGK       | sp P02671 FIBA_HUMAN  | QFTSSTSYNR                           | sp P05156 CFAI_HUMAN      | YQIWTTVVDWIHPDLK                   |
| sp P04217 A1BG_HUMAN  | LLELTGPK                 | sp P02771 FETA_HUMAN  | DLCQAQGVALQTMK                       | sp P0C0L5 CO4B_HUMAN      | RGHLFLQTDQPIYNPGQR                 |
| sp P00739 HPTR_HUMAN  | ILGGHLDK                 | sp P02768 ALBU_HUMAN  | DDNPNLPR                             | sp A0A075B6H9 LV469_HUMAN | FSGSSGAER                          |
| sp P02751 FINC_HUMAN  | LLCQCLGFGSGHFR           | sp P35858 ALS_HUMAN   | VAGLLEDTFPGLLGLR                     | sp P01031 CO5_HUMAN       | MVETTAYALLTSLNLK                   |
| sp P0C0L5 CO4B_HUMAN  | STQDTVIALDALSAYWIASHTTER | sp P19823 ITIH2_HUMAN | IQPSGGTNINEALLR                      | sp P01023 A2MG_HUMAN      | SSSNEEVMFLTVQVK                    |
| sp P00734 THRB_HUMAN  | ETWTANVGK                | sp P0DOX5 IGG1_HUMAN  | EPQVYTLPPSR                          | sp P02771 FETA_HUMAN      | KPTPASIFLQVPEPVTSCAYEED<br>RETFMNK |
| sp P00738 HPT_HUMAN   | HYEGSTVPEKK              | sp P01011 AACT_HUMAN  | DLDSQTMMVLVNYIFFK                    | sp P00450 CERU_HUMAN      | GPEEEHLGILGPVIWAEVGDITR            |
| sp Q06033 ITIH3_HUMAN | EHLVQATPENLQEAR          | sp P0C0L4 CO4A_HUMAN  | TTNIQGINLLFSSR                       | sp P68871 HBB_HUMAN       | LHVDPENFR                          |
| sp P25311 ZA2G_HUMAN  | EDIFMETLK                | sp P0DJ9 SAA2_HUMAN   | AYSDMR                               | sp P01023 A2MG_HUMAN      | TTVMVK                             |
| sp P0C0L5 CO4B_HUMAN  | AEFQDALEK                | sp P0C0L5 CO4B_HUMAN  | AEMADQAAAWLTR                        | sp P02787 TRFE_HUMAN      | TAGWNIPMGLLYNK                     |
| sp P0C0L4 CO4A_HUMAN  | DKGQAGLQR                | sp Q14624 ITIH4_HUMAN | SFAAGIQALGGTNINDAMLMVQLL<br>DSSNQEER | sp P01024 CO3_HUMAN       | DSITTWEILAVSMSDK                   |
| sp P01011 AACT_HUMAN  | FSISR                    | sp P01011 AACT_HUMAN  | KLINDYVK                             | sp P02787 TRFE_HUMAN      | DCHLAQVPSHTVVAR                    |

|                       |                                |                           |                                  |                           |                          |
|-----------------------|--------------------------------|---------------------------|----------------------------------|---------------------------|--------------------------|
| sp P50213 IDH3A_HUMAN | IAEFAFEYAR                     | sp P01861 IGHG4_HUMAN     | VVSVLTVLHQDWLNGK                 | sp P01877 IGHA2_HUMAN     | SVTCHVK                  |
| sp P19827 ITIH1_HUMAN | FAHYVVTSQVVNTANEAR             | sp P00751 CFAB_HUMAN      | EELLP AQDIK                      | sp P04114 APOB_HUMAN      | TGISPLALIK               |
| sp Q13790 APOF_HUMAN  | SYDLDPGAGSLEI                  | sp P19652 A1AG2_HUMAN     | TEDTIFLR                         | sp P01009 A1AT_HUMAN      | FNKPFVFLMIEQNTK          |
| sp P01871 IGHM_HUMAN  | EQLNLR                         | sp P02654 APOC1_HUMAN     | ELISR                            | sp P0CF74 IGLC6_HUMAN     | YAASSYLSLTPEQWK          |
| sp P01859 IGHG2_HUMAN | WYVDGVEVHNAK                   | sp A0A0B4J1U7 HV601_HUMAN | GLEWLGR                          | sp P0DJ19 SAA2_HUMAN      | GPGGAWAAEVISNAR          |
| sp P01011 AACT_HUMAN  | ITDLIK                         | sp P01023 A2MG_HUMAN      | SPCYGYQWVSEEHEEAHHTAYLVFSP<br>SK | sp P02787 TRFE_HUMAN      | HQTVPQNTGGK              |
| sp P00747 PLMN_HUMAN  | TPENYPNAGLTMNYCR               | sp O43866 CD5L_HUMAN      | DVAVLCR                          | sp P19823 ITIH2_HUMAN     | LWAYLTINQLLAER           |
| sp P02743 SAMP_HUMAN  | IVLGQEQDSYGGK                  | sp P19827 ITIH1_HUMAN     | EVAFDLEIPK                       | sp P00751 CFAB_HUMAN      | LLQEQQALEYVCPSPGFYPYVQTR |
| sp P01024 CO3_HUMAN   | VYAYYNLEESCTR                  | sp P02765 FETUA_HUMAN     | EHAVEGDCDFQLLK                   | sp Q14624 ITIH4_HUMAN     | LCVDPR                   |
| sp P0C0L5 CO4B_HUMAN  | NFLVR                          | sp P19652 A1AG2_HUMAN     | SDVMYTDWK                        | sp P01860 IGHG3_HUMAN     | STSGGTAALGCLVK           |
| sp Q14624 ITIH4_HUMAN | ANTVQEATFQMELPK                | sp P01024 CO3_HUMAN       | GYTQQLAFR                        | sp P04114 APOB_HUMAN      | TLADLTLLDSPIK            |
| sp P02768 ALBU_HUMAN  | ALVLIAFAQYLQQPFEDHVK           | sp P02771 FETA_HUMAN      | ITECCK                           | sp P0C0L4 CO4A_HUMAN      | VGLSGMAIADVTLLSGFHALR    |
| sp P01861 IGHG4_HUMAN | GPSVFPLAPCSR                   | sp P0C0L5 CO4B_HUMAN      | EMSGSPASGIPVK                    | sp P01766 HV313_HUMAN     | FTISR                    |
| sp P02647 APOA1_HUMAN | LHELQEK                        | sp P0C0L5 CO4B_HUMAN      | GQIVFMNR                         | sp P01023 A2MG_HUMAN      | HNVYINGITYTPVSSTNEK      |
| sp P0C0L4 CO4A_HUMAN  | LGQYASPTAK                     | sp P04114 APOB_HUMAN      | IYSLWEHSTK                       | sp A0A0C4DH38 HV551_HUMAN | GLEWMGIYPGDS DTR         |
| sp P01024 CO3_HUMAN   | EPGQDLVVLPLSITDFIPSR           | sp P0DOX5 IGG1_HUMAN      | EEQYNSTYR                        | sp P0C0L5 CO4B_HUMAN      | ALEILQEEDLIDEDDIPVR      |
| sp P0C0L4 CO4A_HUMAN  | EFHLHLR                        | sp P02647 APOA1_HUMAN     | LAEYHAK                          | sp P01023 A2MG_HUMAN      | SLNEEAVK                 |
| sp P04114 APOB_HUMAN  | IEGNLIFDPNNYLPK                | sp P02765 FETUA_HUMAN     | HTLNQIDEVK                       | sp P04114 APOB_HUMAN      | TPALHFK                  |
| sp P0C0L5 CO4B_HUMAN  | LLLFSPSVVHLGVPLSVGVQLQ<br>DVPR | sp P04003 C4BPA_HUMAN     | GSSVIHCDADSK                     | sp A0A0B4J1V6 HV373_HUMAN | FTISR                    |
| sp P01861 IGHG4_HUMAN | FNWYVDGVEVHNAK                 | sp P0C0L4 CO4A_HUMAN      | SHALQLNNR                        | sp P0C0L4 CO4A_HUMAN      | GLCVATPVQLR              |
| sp P08603 CFAH_HUMAN  | EFDHNSNIR                      | sp P01023 A2MG_HUMAN      | LLLQQVSLPELPGEYSMK               | sp P02647 APOA1_HUMAN     | AKPALEDLR                |
| sp P0DOX6 IGM_HUMAN   | GEPLSPEK                       | sp P01023 A2MG_HUMAN      | MCPQLQQYEMHGPEGLR                | sp P02749 APOH_HUMAN      | VCPFAGILENGAVR           |
| sp P01860 IGHG3_HUMAN | TPEVTCVVVDVSHEDPEVQFK          | sp P02790 HEMO_HUMAN      | FDPVR                            | sp P01011 AACT_HUMAN      | LYGSEAFATDFQDSAAAK       |
| sp P19652 A1AG2_HUMAN | EQLGEFYEALDCLCIPR              | sp P02768 ALBU_HUMAN      | LVRPEVDVMCTAFHDNEETFLK           | sp P02774 VTDB_HUMAN      | LPDATPTELAK              |

|                       |                                   |                       |                                             |                           |                                     |
|-----------------------|-----------------------------------|-----------------------|---------------------------------------------|---------------------------|-------------------------------------|
| sp P01009 A1AT_HUMAN  | GTEAAGAMFLEAIPMSIPPEVK            | sp P0C0L5 CO4B_HUMAN  | GQAGLQR                                     | sp P00739 HPTR_HUMAN      | VMPICLPSK                           |
| sp P01024 CO3_HUMAN   | QDSLSSQNQLGVLPLSWDIPELV<br>NMGQWK | sp P0DOX5 IGG1_HUMAN  | FNWYVDGVEVHNAK                              | sp P02790 HEMO_HUMAN      | DYFMPCPGR                           |
| sp P00739 HPTR_HUMAN  | NYAEVGR                           | sp P0C0L4 CO4A_HUMAN  | GHLFLQTDQPIYNPGQR                           | sp P04114 APOB_HUMAN      | GMTRPLSTLISSSQSCQYTLDAK             |
| sp P01009 A1AT_HUMAN  | QINDYVEK                          | sp P0C0L5 CO4B_HUMAN  | SMQGGVLVGNDETVALTAFVTIALHH<br>GLAVFQDEGAEPK | sp P0C0L4 CO4A_HUMAN      | EMSGSPASGIPVK                       |
| sp P06727 APOA4_HUMAN | SLAPYAQDTQEK                      | sp P01860 IGHG3_HUMAN | WQQGNIFSCSVMEALHNR                          | sp P08603 CFAH_HUMAN      | IEGDEEMHCSDDGFWSK                   |
| sp P01023 A2MG_HUMAN  | VYDYYETDEFAIAEYNAPCSK             | sp P05546 HEP2_HUMAN  | QFPILLDFK                                   | sp P07360 CO8G_HUMAN      | SLPVSDSVLSGFEQR                     |
| sp P0C0L4 CO4A_HUMAN  | EVYMPSSIFQDDFVIPDISEPGTW<br>K     | sp P02768 ALBU_HUMAN  | ADDKETCFAEEGKK                              | sp Q9UHR4 BI2L1_HUMA<br>N | LNESLDENFK                          |
| sp P04003 C4BPA_HUMAN | GFVLR                             | sp P68871 HBB_HUMAN   | SAVTALWGK                                   | sp P04114 APOB_HUMAN      | IAELSATAQEIIK                       |
| sp P0C0L5 CO4B_HUMAN  | EFHLHLR                           | sp O95445 APOM_HUMAN  | EELATFDPVDNIVFNMAAGSAPMQL<br>HLR            | sp P04114 APOB_HUMAN      | ITENDIQIALDDAK                      |
| sp P04114 APOB_HUMAN  | LQDFSDQLSDYYEK                    | sp P0DJ19 SAA2_HUMAN  | EANYIGSDK                                   | sp P02763 A1AG1_HUMA<br>N | EYQTR                               |
| sp P0DOX2 IGA2_HUMAN  | QEPSQGTTTYAVTSILR                 | sp P01024 CO3_HUMAN   | AGDFLEANYMNLQR                              | sp P08603 CFAH_HUMAN      | TGDEITYQCR                          |
| sp P0DOX7 IGK_HUMAN   | GTVAAPSVFIFPPSDEQLK               | sp P02774 VTDB_HUMAN  | SCESNSPPFVHPGTAECCTK                        | sp P02790 HEMO_HUMAN      | GEVPPR                              |
| sp P04114 APOB_HUMAN  | SLWDFLK                           | sp P00738 HPT_HUMAN   | LRTEGDGVYTLNDK                              | sp P0DOX5 IGG1_HUMAN      | EPQVYTLPPSRDELTK                    |
| sp P02768 ALBU_HUMAN  | FQNALLVR                          | sp Q96PD5 PGRP2_HUMAN | EYGVVLAPDGGSTVAVEPLLAGLEAGL<br>QGR          | sp P02750 A2GL_HUMAN      | GQTLAVAK                            |
| sp Q06033 ITIH3_HUMAN | DYIFGN YIER                       | sp P01023 A2MG_HUMAN  | VVSMDFHPLNELIPLVYIQDPK                      | sp P0C0L5 CO4B_HUMAN      | GLCVATPVQLR                         |
| sp P01871 IGHM_HUMAN  | YAATSQVLLPSK                      | sp P0DOX5 IGG1_HUMAN  | WQQGNVFCVMEALHNHYTQK                        | sp P02649 APOE_HUMAN      | WELALGR                             |
| sp P02768 ALBU_HUMAN  | MPCAEDYLSVVLNQLCVLHEKT<br>PVSDR   | sp P02750 A2GL_HUMAN  | TLDLGENQLETLPPDLLR                          | sp P01024 CO3_HUMAN       | TGLQEVEVK                           |
| sp P06727 APOA4_HUMAN | SLAELGGHLDQQVEEFR                 | sp P00450 CERU_HUMAN  | EVGPTNADPVCLAK                              | sp P01023 A2MG_HUMAN      | GGVEDEVTL SAYITIALLEIPLTVT<br>HPVVR |
| sp P05090 APOD_HUMAN  | NPNLPPETVDSLK                     | sp P02655 APOC2_HUMAN | STAAMSTYTGFITDQVLSVLKGEE                    | sp Q9HCJ0 TNR6C_HUMA<br>N | TSSWLVL R                           |
| sp P00751 CFAB_HUMAN  | VSEADSSNADWVTK                    | sp P02751 FINC_HUMAN  | SSPVVIDASTAIDAPSNLR                         | sp P0C0L5 CO4B_HUMAN      | TTNIQGINLLFSSR                      |

|                              |                                    |                       |                          |                           |                          |
|------------------------------|------------------------------------|-----------------------|--------------------------|---------------------------|--------------------------|
| sp P01008 ANT3_HUMAN         | ANRPFLVFIR                         | sp P01024 CO3_HUMAN   | ADIGCTPGSGK              | sp P00450 CERU_HUMAN      | TYCSEPEK                 |
| sp P0C0L5 CO4B_HUMAN         | AAANQMR                            | sp P04114 APOB_HUMAN  | AQIPILR                  | sp P04114 APOB_HUMAN      | NSEEFAAAMSR              |
| sp P0C0L5 CO4B_HUMAN         | VDFTLSSER                          | sp P10909 CLUS_HUMAN  | RPHFFFPK                 | sp P02750 A2GL_HUMAN      | ENQLEVLEVSWLHGLK         |
| sp P0DOX2 IGA2_HUMAN         | DVLVR                              | sp P0C0L5 CO4B_HUMAN  | DFALLSLQVPLK             | sp P02750 A2GL_HUMAN      | ALGHLDLSGNR              |
| sp P01023 A2MG_HUMAN         | SSGSLLNNAIK                        | sp P00751 CFAB_HUMAN  | EAGIPEFYDYDVALIK         | sp P01871 IGHM_HUMAN      | QIQVSWLR                 |
| sp P0C0L5 CO4B_HUMAN         | EVYMPSIFQDDFVIPDISEPGTW<br>K       | sp P01024 CO3_HUMAN   | DAPDHQELNLDVSLQLPSR      | sp P02771 FETA_HUMAN      | LLACGEGAADIIGHLCIR       |
| sp P0DOX7 IGK_HUMAN          | TVAAPSVFIFPPSDEQLK                 | sp P01042 KNG1_HUMAN  | ENFLFLTPDCK              | sp P02647 APOA1_HUMA<br>N | THLAPYSDELK              |
| sp P04114 APOB_HUMAN         | ESQLPTVMDFR                        | sp P00738 HPT_HUMAN   | LPECEADDGCPKPEIAHGVEHSVR | sp P01024 CO3_HUMAN       | VVPEGIR                  |
| sp P01009 A1AT_HUMAN         | KQINDYVEK                          | sp P08185 CBG_HUMAN   | MNTVIAALSR               | sp P0C0L4 CO4A_HUMAN      | GLQDEDEGYR               |
| sp P68871 HBB_HUMAN          | EFTPPVQAAYQK                       | sp P01023 A2MG_HUMAN  | VTAAPQSVCALR             | sp P02768 ALBU_HUMAN      | LVAASQAALGL              |
| sp P0C0L4 CO4A_HUMAN         | NPSDPMPQAPALWIETTAYALL<br>HLLLHEGK | sp P02751 FINC_HUMAN  | GLKPGVVYEGQLISIQYGHQEVTR | sp P0DJI8 SAA1_HUMAN      | SFFSFLGEAFDGR            |
| sp P0DJI9 SAA2_HUMAN         | SFFSFLGEAFDGR                      | sp P01861 IGHG4_HUMAN | WYVDGVEVHNAK             | sp P02749 APOH_HUMAN      | WSPELPVCAPICPPPSIPTFATLR |
| sp A0A075B6K5 LV39_HUMA<br>N | RPSGIPER                           | sp P06727 APOA4_HUMAN | LTPYADEFK                | sp P02647 APOA1_HUMA<br>N | EQLGPVTQEFWDNLEK         |
| sp P01023 A2MG_HUMAN         | VDLSFSPSQSLPASHAHLR                | sp P01780 HV307_HUMAN | YYVDSVK                  | sp P01871 IGHM_HUMAN      | VSVFVPPR                 |
| sp P0C0L5 CO4B_HUMAN         | TLEIPGNSDPNMIPDGFNSYVR             | sp P0DOX2 IGA2_HUMAN  | AEDTAVYYCAR              | sp P05546 HEP2_HUMAN      | FPVEMTHNHNFR             |
| sp P01024 CO3_HUMAN          | KVFLDCCNYITELR                     | sp P01024 CO3_HUMAN   | QNQELK                   | sp P0DP03 HV335_HUMA<br>N | FTISR                    |
| sp P02760 AMBP_HUMAN         | TVAACNLPIVR                        | sp P01031 CO5_HUMAN   | DSEITFIK                 | sp P0C0L5 CO4B_HUMAN      | SFFPENWLWR               |
| sp P01591 IGJ_HUMAN          | FVYHLSDLCK                         | sp P06727 APOA4_HUMAN | TQVNTQAEQLR              | sp P01024 CO3_HUMAN       | IEGDHGAR                 |
| sp P04114 APOB_HUMAN         | IVQILPWEQNEQVK                     | sp P0DOX2 IGA2_HUMAN  | SAVEGPPER                | sp P01024 CO3_HUMAN       | ENEGFTVTAEGK             |
| sp P27169 PON1_HUMAN         | IQNILTEEPK                         | sp P02760 AMBP_HUMAN  | AFIQLWAFDAVK             | sp P02787 TRFE_HUMAN      | HSTIFENLANK              |
| sp P05546 HEP2_HUMAN         | YEITTIHNLFR                        | sp P51884 LUM_HUMAN   | ISNIPDEYFK               | sp P01877 IGHA2_HUMAN     | VAAEDWK                  |
| sp P01871 IGHM_HUMAN         | QVGSVTTDQVQAEAK                    | sp P00734 THRB_HUMAN  | HQDFNSAVQLVENFCR         | sp P10909 CLUS_HUMAN      | VTTVASHTSDSDVPSGVTEVVVK  |
| sp P01008 ANT3_HUMAN         | LQPLDFK                            | sp P02652 APOA2_HUMAN | VKSPELQAEAK              | sp P02749 APOH_HUMAN      | TFYEPGEEITYSCKPGYVSR     |
| sp P01009 A1AT_HUMAN         | LQHLENELTHDIITK                    | sp P01023 A2MG_HUMAN  | QFSFPLSSEPFQGSYK         | sp P00747 PLMN_HUMAN      | QLGAGSIEECAAK            |



|                           |                                    |                       |                     |                           |                                |
|---------------------------|------------------------------------|-----------------------|---------------------|---------------------------|--------------------------------|
| sp P0C0L5 CO4B_HUMAN      | VVEEQESR                           | sp P02652 APOA2_HUMAN | SKEQLTPLIK          | sp P04217 A1BG_HUMAN      | CEGPIPDVTFELLR                 |
| sp P08603 CFAH_HUMAN      | GDAVCTESGWRPLPSCEEK                | sp P02787 TRFE_HUMAN  | DDTVCLAK            | sp P0DP03 HV335_HUMAN     | AEDTAVYYCAK                    |
| sp P01859 IGHG2_HUMAN     | FNWYVDGVEVHNAK                     | sp P01860 IGHG3_HUMAN | WYVDGVEVHNAK        | sp P01876 IGHA1_HUMAN     | TFTCTAAYPESK                   |
| sp P02763 A1AG1_HUMAN     | TEDTIFLR                           | sp P02768 ALBU_HUMAN  | CASLQK              | sp P01859 IGHG2_HUMAN     | GPSVFPLAPCSR                   |
| sp P0C0L4 CO4A_HUMAN      | EPFLSCCQFAESLR                     | sp P01766 HV313_HUMAN | AGDTAVYYCAR         | sp P02787 TRFE_HUMAN      | DGAGDVAFVK                     |
| sp P02647 APOA1_HUMAN     | QGLLPVLESFK                        | sp P02787 TRFE_HUMAN  | GDVAFVK             | sp P0DOX5 IGG1_HUMAN      | TPEVTCVVVDVSHEDPEVK            |
| sp P00747 PLMN_HUMAN      | DVVLF EK                           | sp P68871 HBB_HUMAN   | VHLTPEEK            | sp P0C0L4 CO4A_HUMAN      | GQAGLQR                        |
| sp P04114 APOB_HUMAN      | SVSLPSLDPASAK                      | sp P02790 HEMO_HUMAN  | EFWFDLATGTMK        | sp P01024 CO3_HUMAN       | AEDLVGK                        |
| sp P0DOX6 IGM_HUMAN       | GFPSVLR                            | sp P01859 IGHG2_HUMAN | TTPM L DSDGSFFLYSK  | sp P04114 APOB_HUMAN      | VIGNMGQTMEQLTPELK              |
| sp P04114 APOB_HUMAN      | LAPGELTIIL                         | sp P02763 A1AG1_HUMAN | NWGLSVYADKPETTK     | sp P01024 CO3_HUMAN       | LVAYYTLIGASGQR                 |
| sp P0DOY2 IGLC2_HUMAN     | SYSCQVTHEGSTVEK                    | sp P0C0L4 CO4A_HUMAN  | MRPSTDTITVMVENSHGLR | sp P02647 APOA1_HUMAN     | LREQLGPVTQEFWDNLEKETEGLR       |
| sp P01031 CO5_HUMAN       | GIYGTISR                           | sp P02771 FETA_HUMAN  | DFNQFSSGEK          | sp P01701 LV151_HUMAN     | LLIYDNNK                       |
| sp P02768 ALBU_HUMAN      | RHPDYSVVLLLR                       | sp P01024 CO3_HUMAN   | FVTVQATFGTQVVEK     | sp P00738 HPT_HUMAN       | NPANPVQR                       |
| sp P02771 FETA_HUMAN      | HEMTPVNPVGVCCTSSYANR               | sp P01024 CO3_HUMAN   | SDDKVTL EER         | sp P00450 CERU_HUMAN      | GVYSSDVFDIFPGTYQTLEMFPR        |
| sp P04217 A1BG_HUMAN      | ATWSGAVLAGR                        | sp P08697 A2AP_HUMAN  | DSFHLDEQFTVPVEMMQAR | sp A0A0B4J1Y9 HV372_HUMAN | TEDTAVYYCAR                    |
| sp P01011 AACT_HUMAN      | NLAVSQVVHK                         | sp Q14624 ITIH4_HUMAN | SPEQQETVLDGNLIIR    | sp A0A0B4J1X5 HV374_HUMAN | GLVWVSR                        |
| sp P04114 APOB_HUMAN      | ADYVETVLDSTCSSTVQFLEYEL<br>NVLGTHK | sp P02774 VTDB_HUMAN  | ELSSFIDK            | sp P00738 HPT_HUMAN       | DYAEVGR                        |
| sp P00734 THRB_HUMAN      | RQECSIPVCGQDQVTVAMTPR              | sp P02768 ALBU_HUMAN  | QTALVELVK           | sp P0C0L4 CO4A_HUMAN      | LHLETDSLALVALGALDTALYAA<br>GSK |
| sp Q14624 ITIH4_HUMAN     | QGPVNLLSDPEQGVEVTGQYER             | sp P00450 CERU_HUMAN  | DIASGLIGPLICK       | sp P01023 A2MG_HUMAN      | VTGEGCVYLQTSLK                 |
| sp P01859 IGHG2_HUMAN     | WQQGNVFSVMSVMHEALHNHYT<br>QK       | sp A0M8Q6 IGLC7_HUMAN | YAASSYLSLTPEQWK     | sp P01834 IGKC_HUMAN      | DSTYLSSTLTLSK                  |
| sp A0A0C4DH72 KV106_HUMAN | LLIYAASSLQSGVPSR                   | sp P19827 ITIH1_HUMAN | GSLVQASEANLQAAQDFVR | sp P00739 HPTR_HUMAN      | VLVNER                         |

|                       |                                    |                       |                             |                       |                            |
|-----------------------|------------------------------------|-----------------------|-----------------------------|-----------------------|----------------------------|
| sp P0C0L5 CO4B_HUMAN  | YVLPNFEVK                          | sp P05155 IC1_HUMAN   | LLDSLPSDTR                  | sp P0C0L4 CO4A_HUMAN  | TYNVLDMK                   |
| sp P01024 CO3_HUMAN   | AFSDR                              | sp P05546 HEP2_HUMAN  | EYYFAEAQIADFSDFPAFISK       | sp P00739 HPTR_HUMAN  | SPVGVQPILNEHTFCVGMKS       |
| sp P02647 APOA1_HUMAN | AHVDALR                            | sp P0DOY2 IGLC2_HUMAN | AGVETTTTPSK                 | sp Q14624 ITIH4_HUMAN | SIQNNVR                    |
| sp P04114 APOB_HUMAN  | VELEVPQLCSFILK                     | sp P01871 IGHM_HUMAN  | DGFFGNPR                    | sp P01024 CO3_HUMAN   | TMQALPYSTVGNNSNYLHLSVLR    |
| sp P02787 TRFE_HUMAN  | APNHAVVTR                          | sp P00736 C1R_HUMAN   | QRPPDLDTSSNAVDLLFFTDESGDSR  | sp O14791 APOL1_HUMAN | ILQADQEL                   |
| sp P0C0L4 CO4A_HUMAN  | SFFPENWLWR                         | sp P01024 CO3_HUMAN   | KVLLDGVQNPR                 | sp P02679 FIBG_HUMAN  | EGFGHLSPTGTTEFWLGNEK       |
| sp P02768 ALBU_HUMAN  | VPQVSTPTLVEVSR                     | sp P10909 CLUS_HUMAN  | LFSDSPITVTVPVEVSR           | sp P01024 CO3_HUMAN   | YFKPGMPFDLMVFVTNPDGSPAYR   |
| sp P01624 KV315_HUMAN | ATGIPAR                            | sp P01042 KNG1_HUMAN  | AVDAALK                     | sp P43652 AFAM_HUMAN  | RHPDLSIPELLR               |
| sp P19652 A1AG2_HUMAN | WFYIASAFR                          | sp P01019 ANGT_HUMAN  | LQAILGVPWK                  | sp P01009 A1AT_HUMAN  | SPLFMGK                    |
| sp P00751 CFAB_HUMAN  | LQDEDLGL                           | sp P0C0L5 CO4B_HUMAN  | LGQYASPTAK                  | sp P01624 KV315_HUMAN | ATLSCR                     |
| sp P02647 APOA1_HUMAN | ATEHLSTLSEK                        | sp P00738 HPT_HUMAN   | GSPFWQAK                    | sp P04114 APOB_HUMAN  | IADFELPTIIVPEQTIEPSIK      |
| sp P01834 IGKC_HUMAN  | SGTASVVCLNNFYPR                    | sp P05156 CFAI_HUMAN  | AQLGDLPWQVAIK               | sp P04114 APOB_HUMAN  | DLGQCDR                    |
| sp P19823 ITIH2_HUMAN | FLHVPDTFEGHFDGVPVISK               | sp P08603 CFAH_HUMAN  | NTEILTGSWSDQTYPEGTQAIYK     | sp P00734 THRB_HUMAN  | GQPSVLQVVNLPIVERPVCK       |
| sp Q14624 ITIH4_HUMAN | AGFSWIEVTFK                        | sp P00751 CFAB_HUMAN  | CLVNLIEK                    | sp P43652 AFAM_HUMAN  | ELISLVEDVSSNYDGCCEGDVVQCIR |
| sp P01714 LV319_HUMAN | ITCQGDSLR                          | sp P06727 APOA4_HUMAN | LLPHANEVSQK                 | sp P04196 HRG_HUMAN   | RPSEIVIGQCK                |
| sp P0C0L4 CO4A_HUMAN  | GPEVQLVAHSPWLK                     | sp P0C0L4 CO4A_HUMAN  | AACAQLNDFLQEYGTQGCQV        | sp P01877 IGHA2_HUMAN | QEPSQGTTTTYAVTSILR         |
| sp P02790 HEMO_HUMAN  | SGAQATWTELPWPHEK                   | sp P02787 TRFE_HUMAN  | DLLFR                       | sp P01624 KV315_HUMAN | LLIYGASTR                  |
| sp P00738 HPT_HUMAN   | VVLHPNYSQVDIGLIK                   | sp P01023 A2MG_HUMAN  | AVDQSVLLMKPDAELSASSVYNLLPEK | sp P01011 AACT_HUMAN  | EQLSLDR                    |
| sp Q14624 ITIH4_HUMAN | EAVSGR                             | sp P01023 A2MG_HUMAN  | YDVENCLANK                  | sp P07996 TSP1_HUMAN  | GGVNDNFQGVLQNVNR           |
| sp P02787 TRFE_HUMAN  | WCAVSEHEATK                        | sp P01023 A2MG_HUMAN  | FQVDNNNR                    | sp P02787 TRFE_HUMAN  | ASYLDCIR                   |
| sp P02743 SAMP_HUMAN  | AYSLSYNTQGR                        | sp P06727 APOA4_HUMAN | ENADSLQASLRPHADELK          | sp P01024 CO3_HUMAN   | IFTVNHK                    |
| sp P05543 THBG_HUMAN  | GTEAAA VPEVELSDQPENTFLHP<br>IIQIDR | sp P02768 ALBU_HUMAN  | NYAEAK                      | sp P02774 VTDB_HUMAN  | LCMAALK                    |
| sp P01023 A2MG_HUMAN  | ALLAYAFALAGNQDK                    | sp O43866 CD5L_HUMAN  | LEV LHK                     | sp P04114 APOB_HUMAN  | SHDELPR                    |

|                       |                          |                           |                       |                       |                              |
|-----------------------|--------------------------|---------------------------|-----------------------|-----------------------|------------------------------|
| sp P19823 ITIH2_HUMAN | TILDDLRAEDHFSVIDFNQNIR   | sp P0C0L4 CO4A_HUMAN      | AVGSGATFSHYYYMILSR    | sp P04196 HRG_HUMAN   | ALDLINK                      |
| sp P01019 ANGT_HUMAN  | SLDFTELDVAAEK            | sp P0DOX8 IGL1_HUMAN      | TVAPTECS              | sp P02771 FETA_HUMAN  | AENAVECFQTK                  |
| sp P0DJ19 SAA2_HUMAN  | GNYDAAK                  | sp P06681 CO2_HUMAN       | DFHINLFR              | sp P06396 GELS_HUMAN  | DPDQTDGLGLSYLSSHIANVER       |
| sp P02787 TRFE_HUMAN  | EDLIWELLNQAQEHFGK        | sp P04114 APOB_HUMAN      | IAIANIIDEIIEK         | sp P02751 FINC_HUMAN  | NFLVR                        |
| sp P04114 APOB_HUMAN  | LQAEAR                   | sp P01871 IGHM_HUMAN      | GVALHRPDVYLLPPAR      | sp P04114 APOB_HUMAN  | SPAFTDLHLR                   |
| sp P02768 ALBU_HUMAN  | VHTECCHGDLLECADDR        | sp A0A0A0MRZ8 KVD11_HUMAN | ATGIPAR               | sp P01011 AACT_HUMAN  | DEELSCTVVELK                 |
| sp P08603 CFAH_HUMAN  | RPYFPVAVGK               | sp P22792 CPN2_HUMAN      | GQVVPALNEK            | sp P01024 CO3_HUMAN   | EVVADSVWVDVK                 |
| sp P04114 APOB_HUMAN  | ETLEDTR                  | sp P05546 HEP2_HUMAN      | GETHEQVHSILHFK        | sp O43866 CD5L_HUMAN  | GQWGTVCDDGWDIK               |
| sp Q14624 ITIH4_HUMAN | ILDDLSPR                 | sp P04114 APOB_HUMAN      | SVGFHLPSR             | sp P02647 APOA1_HUMAN | VSFSALEEYTK                  |
| sp P01871 IGHM_HUMAN  | DVMQGTDEHVVCK            | sp P02787 TRFE_HUMAN      | EFQLFSSPHGK           | sp P0DOX6 IGM_HUMAN   | YAATSQVLLPSK                 |
| sp P19827 ITIH1_HUMAN | ELAAQTIK                 | sp P01024 CO3_HUMAN       | DFDFVPPVVR            | sp P02765 FETUA_HUMAN | HTFMGVVSLGSPSGEVSHPR         |
| sp P0C0L5 CO4B_HUMAN  | GLQDEDGYR                | sp P02768 ALBU_HUMAN      | ALLVR                 | sp P04003 C4BPA_HUMAN | CEWETPEGCEQVLTGK             |
| sp P02787 TRFE_HUMAN  | NLNEKDYELLCLDGTR         | sp P00751 CFAB_HUMAN      | VSVGGEK               | sp P02768 ALBU_HUMAN  | AACLLPK                      |
| sp P01024 CO3_HUMAN   | QELSEAEQATR              | sp P0DOX2 IGA2_HUMAN      | SVTCHVK               | sp P02647 APOA1_HUMAN | QKVEPLR                      |
| sp P0DOX8 IGL1_HUMAN  | ANPTVTLFPPSSEELQANK      | sp P02771 FETA_HUMAN      | IMSYICSQQDTLSNK       | sp P01825 HV459_HUMAN | LSSVTAADTAVYYCAR             |
| sp P0DOX6 IGM_HUMAN   | FTCTVTHTDLPSPK           | sp P02760 AMBIP_HUMAN     | GECVPGEQEPEPILIPR     | sp P0DOX8 IGL1_HUMAN  | YAASSYLSLTPEQWK              |
| sp P01024 CO3_HUMAN   | SYTVAIAGYALAQMGR         | sp P0DOX5 IGG1_HUMAN      | WYVDGVEVHNAK          | sp P02751 FINC_HUMAN  | VVTPLSPPTNLHLEANPDTGVLTVSWER |
| sp P06396 GELS_HUMAN  | SEDCFILDHGK              | sp P0C0L4 CO4A_HUMAN      | LELSVDGAK             | sp P04114 APOB_HUMAN  | SPSQADINK                    |
| sp P02765 FETUA_HUMAN | AQLVPLPPSTYVEFTVSGTDCVAK | sp P04003 C4BPA_HUMAN     | WTPYQGCEALCCPEPK      | sp P01877 IGHA2_HUMAN | VPPPPCCHPR                   |
| sp P0DOX7 IGK_HUMAN   | VTITCR                   | sp P02751 FINC_HUMAN      | VDVIPVNLPGEHGQR       | sp P01011 AACT_HUMAN  | ITLLSALVETR                  |
| sp P02768 ALBU_HUMAN  | DVFLGMFLYEYAR            | sp P02671 FIBA_HUMAN      | GLIDEVNQDFTNR         | sp P01024 CO3_HUMAN   | NTLIHYLDK                    |
| sp P02774 VTDB_HUMAN  | GQELCADYSENTFTEYK        | sp P02771 FETA_HUMAN      | RPCFSSLVDETYVPPAFSDDK | sp P19827 ITIH1_HUMAN | QYYEGSEIVVAGR                |

|                      |                                |                       |                  |                               |                         |
|----------------------|--------------------------------|-----------------------|------------------|-------------------------------|-------------------------|
| sp P0C0L5 CO4B_HUMAN | GSVFLR                         | sp P01031 CO5_HUMAN   | ALVEGVDQLFTDYQIK | sp P01743 HV146_HUMAN         | SEDTAVYYCAR             |
| sp P01834 IGKC_HUMAN | VYACEVTHQGLSSPVTK              | sp P01594 KV133_HUMAN | LLIYDASNLETGVPSR | sp P0DOX6 IGM_HUMAN           | ALEWLAR                 |
| sp P0DOX5 IGG1_HUMAN | TTPPVLDSDGSFFLYSK              | sp P0DJI8 SAA1_HUMAN  | AYSDMR           | sp Q06033 ITIH3_HUMAN         | LWAYLTIEQLLEK           |
| sp P0DOX5 IGG1_HUMAN | THTCPPCPAPELLGGPSVFLFPPK<br>PK | sp P00738 HPT_HUMAN   | LRTEGDGVYTLNNEK  | sp O75636 FCN3_HUMAN          | GVGHPYR                 |
| sp P01009 A1AT_HUMAN | DTVFALVNYIFFK                  | sp P01624 KV315_HUMAN | LLIYGASTRATGIPAR | sp P04114 APOB_HUMAN          | GSVLSR                  |
| sp P01023 A2MG_HUMAN | FEVQVTVPK                      | sp P0DOX6 IGM_HUMAN   | NVPLPVIAELPPK    | sp P0C0L5 CO4B_HUMAN          | VGLSGMAIADVTLTLLSGFHALR |
| sp P0DOX7 IGK_HUMAN  | VYACEVTHQGLSSPVTK              | sp P0DOX6 IGM_HUMAN   | YVTSAPMPEPQAPGR  | sp A0A0B4J1V6 HV373_H<br>UMAN | GLEWVGR                 |
| sp P01024 CO3_HUMAN  | EDIPPADLSDQVPDTESETR           | sp O43866 CD5L_HUMAN  | EATLQDCPSGPWGK   | sp A0A0C4DH38 HV551_H<br>UMAN | ASDTAMYYPYCAR           |
| sp P02771 FETA_HUMAN | KPTPASIFLQVPEPVTSCAEAYEE<br>DR | sp P0C0L4 CO4A_HUMAN  | DHAVDLIQK        | sp P02790 HEMO_HUMAN          | QGHNSVFLIK              |

---

**Table S4** Differential expression proteins filtered from mdCATs DIA quantification of 21 human serum.

|           | <b>ID</b>  | <b>Entry</b> | <b>lev</b> | <b>pvalue</b> | <b>fc</b> | <b>log(FoldChange)</b> | <b>-log(pvalue)</b> | <b>sig</b> |
|-----------|------------|--------------|------------|---------------|-----------|------------------------|---------------------|------------|
| <b>1</b>  | P08697     | A2AP         | 0.018157   | 0.007495      | 0.621472  | -0.68624               | 7.05977             | down       |
| <b>2</b>  | P02760     | AMBP         | 0.077769   | 1.62E-05      | 0.605891  | -0.72287               | 15.91547            | down       |
| <b>3</b>  | P05090     | APOD         | 0.047224   | 0.000535      | 1.878491  | 0.909574               | 10.86746            | up         |
| <b>4</b>  | P02649     | APOE         | 0.017675   | 4.59E-06      | 0.639602  | -0.64475               | 17.73177            | down       |
| <b>5</b>  | P08185     | CBG          | 0.002242   | 0.005377      | 0.442845  | -1.17512               | 7.538911            | down       |
| <b>6</b>  | P06681     | CO2          | 0.112869   | 0.030043      | 1.371948  | 0.456226               | 5.05684             | up         |
| <b>7</b>  | P13671     | CO6          | 0.004926   | 0.000252      | 0.336167  | -1.57275               | 11.95233            | down       |
| <b>8</b>  | P10643     | CO7          | 0.001727   | 8.73E-05      | 1.694949  | 0.761242               | 13.48425            | up         |
| <b>9</b>  | Q03591     | CFHR1        | 0.00065    | 7.28E-09      | 0.328254  | -1.60712               | 27.03273            | down       |
| <b>10</b> | P02671     | FIBA         | 0.007809   | 0.000252      | 1.828676  | 0.870799               | 11.95236            | up         |
| <b>11</b> | P04196     | HRG          | 0.05172    | 0.001109      | 1.692974  | 0.75956                | 9.816808            | up         |
| <b>12</b> | P01782     | HV309        | 0.142328   | 0.000336      | 0.647356  | -0.62737               | 11.5408             | down       |
| <b>13</b> | P01772     | HV333        | 0.161285   | 0.000323      | 0.647103  | -0.62793               | 11.59776            | down       |
| <b>14</b> | A0A0B4J1X5 | HV374        | 0.161285   | 0.000323      | 0.647103  | -0.62793               | 11.59776            | down       |
| <b>15</b> | A0A0J9YVY3 | HV741        | 0.243781   | 0.00011       | 0.589241  | -0.76307               | 13.15674            | down       |
| <b>16</b> | P50213     | IDH3A        | 0.022907   | 0.000584      | 1.555407  | 0.637292               | 10.74166            | up         |
| <b>17</b> | Q06033     | ITIH3        | 0.217803   | 0.000372      | 1.837598  | 0.877821               | 11.39328            | up         |
| <b>18</b> | P01624     | KV315        | 0.000834   | 2.81E-05      | 2.432804  | 1.28262                | 15.11947            | up         |
| <b>19</b> | P01619     | KV320        | 9.28E-05   | 3.37E-05      | 3.114743  | 1.639113               | 14.85591            | up         |
| <b>20</b> | A0A0A0MRZ8 | KVD11        | 8.9E-05    | 6.15E-05      | 1.950751  | 0.964029               | 13.98994            | up         |
| <b>21</b> | P18428     | LBP          | 0.022844   | 0.007412      | 0.352637  | -1.50375               | 7.075983            | down       |
| <b>22</b> | Q9H1C0     | LPAR5        | 0.023606   | 1.16E-08      | 0.334008  | -1.58204               | 26.35557            | down       |
| <b>23</b> | Q96PD5     | PGRP2        | 0.001421   | 0.001395      | 0.407898  | -1.29372               | 9.486025            | down       |
| <b>24</b> | P35542     | SAA4         | 0.150559   | 0.002399      | 0.570855  | -0.8088                | 8.703384            | down       |
| <b>25</b> | Q66K66     | TM198        | 0.134209   | 0.000241      | 1.605782  | 0.683276               | 12.02               | up         |
| <b>26</b> | P02766     | TTHY         | 0.000512   | 1.98E-07      | 0.450554  | -1.15023               | 22.26808            | down       |
| <b>27</b> | P04004     | VTNC         | 0.564499   | 7E-09         | 0.613816  | -0.70412               | 27.09094            | down       |

## References

- 1 Z. J. Kaminski, B. Kolesińska, J. Kolesińska, G. Sabatino, M. Chelli, P. Rovero, M. Błaszczuk, M. L. Głowska and A. M. Papini, *J. Am. Chem. Soc.*, 2005, **127**, 16912–16920.
- 2 Q. Gao, H. Zhu, L. Dong, W. Shi, R. Chen, Z. Song, C. Huang, J. Li, X. Dong, Y. Zhou, Q. Liu, L. Ma, X. Wang, J. Zhou, Y. Liu, E. Boja, A. I. Robles, W. Ma, P. Wang, Y. Li, L. Ding, B. Wen, B. Zhang, H. Rodriguez, D. Gao, H. Zhou and J. Fan, *Cell*, 2019, **179**, 561-577 e522.
- 3 Y. Jiang, A. Sun, Y. Zhao, W. Ying, H. Sun, X. Yang, B. Xing, W. Sun, L. Ren, B. Hu, C. Li, L. Zhang, G. Qin, M. Zhang, N. Chen, M. Zhang, Y. Huang, J. Zhou, Y. Zhao, M. Liu, X. Zhu, Y. Qiu, Y. Sun, C. Huang, M. Yan, M. Wang, W. Liu, F. Tian, H. Xu, J. Zhou, Z. Wu, T. Shi, W. Zhu, J. Qin, L. Xie, J. Fan, X. Qian, F. He and C. Chinese Human Proteome Project, *Nature*, 2019, **567**, 257-261.
